# Supplementary material for: Development of a Prognostic Model Based on Pyroptosis-Related Genes in Pancreatic Adenocarcinoma
Source: Hindawi journal article supplement (doi:10.1155/2022/9141117), 2022-05-29
Supplement: f1 [file 9141117.f1.pdf]

Table S1

| id       | logFC    | AveExpr  | t        | adj.P.Val | P.Value  | B        |
|----------|----------|----------|----------|-----------|----------|----------|
| SIGLEC11 | -1.18033 | 0.358111 | -7.01368 | 4.48E-11  | 5.78E-08 | 14.69692 |
| STAB2    | -1.01441 | 0.188531 | -5.85623 | 2.19E-08  | 1.11E-05 | 8.900629 |
| CD33     | -1.01299 | 0.691405 | -5.46193 | 1.54E-07  | 5.61E-05 | 7.081999 |
| HBA1     | -1.08005 | 0.238181 | -5.08332 | 9.21E-07  | 0.000246 | 5.420568 |
| SOWAHD   | -1.11713 | 0.869964 | -5.0617  | 1.02E-06  | 0.000269 | 5.328318 |
| RASGRP3  | -1.13792 | 1.308507 | -5.03187 | 1.17E-06  | 0.000292 | 5.201526 |
| TFEC     | -1.18031 | 0.734619 | -5.00419 | 1.32E-06  | 0.000317 | 5.084374 |
| CD68     | -1.1302  | 0.973534 | -4.95219 | 1.68E-06  | 0.000376 | 4.865576 |
| CLECL1   | -1.20748 | 0.51323  | -4.87033 | 2.42E-06  | 0.000524 | 4.524639 |
| GZMA     | -1.47823 | 1.081629 | -4.83925 | 2.78E-06  | 0.000579 | 4.396315 |
| KEL      | -1.03204 | 0.290412 | -4.82632 | 2.95E-06  | 0.000604 | 4.343137 |
| KLRF1    | -1.01212 | 0.569993 | -4.77549 | 3.69E-06  | 0.000733 | 4.135048 |
| PARVG    | -1.73874 | 1.573965 | -4.75416 | 4.06E-06  | 0.000789 | 4.048228 |
| GDPD5    | -1.08617 | 1.555631 | -4.73609 | 4.39E-06  | 0.000838 | 3.974935 |
| MATK     | -1.23222 | 0.91888  | -4.70682 | 4.99E-06  | 0.000925 | 3.856628 |
| AGR2     | 4.39935  | 6.893834 | 4.690099 | 5.37E-06  | 0.000958 | 3.789298 |
| SIGLEC7  | -1.25931 | 1.002212 | -4.63139 | 6.92E-06  | 0.001213 | 3.554405 |
| CX3CR1   | -1.42765 | 0.892325 | -4.53525 | 1.05E-05  | 0.001665 | 3.174683 |
| GNGT2    | -1.05051 | 1.02428  | -4.50244 | 1.20E-05  | 0.001852 | 3.046537 |
| ADAP2    | -1.29034 | 1.875658 | -4.49016 | 1.27E-05  | 0.001905 | 2.998778 |
| P2RX7    | -1.07935 | 1.041922 | -4.46819 | 1.39E-05  | 0.002058 | 2.913567 |
| BAALC    | -1.00186 | 0.791721 | -4.44638 | 1.52E-05  | 0.002179 | 2.829285 |
| GAB3     | -1.11803 | 1.108956 | -4.40814 | 1.78E-05  | 0.002495 | 2.68234  |
| MYO1F    | -1.57978 | 2.033575 | -4.40328 | 1.82E-05  | 0.002525 | 2.663752 |
| DOK3     | -1.48542 | 1.692232 | -4.3798  | 2.01E-05  | 0.002741 | 2.574091 |
| LILRA4   | -1.24515 | 0.529409 | -4.29072 | 2.90E-05  | 0.003556 | 2.237474 |
| FADS3    | -1.17681 | 2.077556 | -4.28034 | 3.02E-05  | 0.003663 | 2.198632 |
| AIM2     | -1.11037 | 1.191384 | -4.25977 | 3.29E-05  | 0.003934 | 2.12184  |
| SCIMP    | -1.52884 | 1.18793  | -4.21112 | 4.00E-05  | 0.00451  | 1.941418 |
| SIGLEC9  | -1.20319 | 1.294977 | -4.19724 | 4.23E-05  | 0.004687 | 1.890242 |
| GAPT     | -1.45139 | 0.934427 | -4.18055 | 4.53E-05  | 0.004955 | 1.828917 |
| TMEM131  | -1.42492 | 1.923222 | -4.17604 | 4.61E-05  | 0.005017 | 1.812357 |
| NPL      | -1.26306 | 1.933729 | -4.15238 | 5.06E-05  | 0.005392 | 1.72584  |
| PLD4     | -1.16546 | 0.916632 | -4.13494 | 5.43E-05  | 0.005707 | 1.662292 |
| P2RY13   | -1.47319 | 1.14221  | -4.11435 | 5.89E-05  | 0.006009 | 1.587591 |
| LILRB2   | -1.40812 | 1.421726 | -4.10825 | 6.04E-05  | 0.006089 | 1.565512 |
| TLR7     | -1.15712 | 0.858733 | -4.10422 | 6.13E-05  | 0.006124 | 1.550942 |
| CEACAM21 | -1.13031 | 0.938907 | -4.09621 | 6.33E-05  | 0.006223 | 1.522022 |
| CASP1    | -1.42702 | 1.870362 | -4.05065 | 7.57E-05  | 0.007187 | 1.358364 |
| 1-Mar    | -1.09197 | 1.08626  | -4.00999 | 8.87E-05  | 0.00799  | 1.213579 |
| DPEP2    | -1.32822 | 1.311917 | -4.00111 | 9.19E-05  | 0.008194 | 1.182125 |
| BTK      | -1.65389 | 1.578263 | -3.99945 | 9.24E-05  | 0.008209 | 1.176254 |
| FGD2     | -1.22557 | 1.243879 | -3.98936 | 9.61E-05  | 0.008443 | 1.140602 |
| CIITA    | -1.49369 | 1.764208 | -3.98866 | 9.64E-05  | 0.008443 | 1.138129 |
| PRAM1    | -1.21196 | 1.263649 | -3.96065 | 0.000107  | 0.009015 | 1.039559 |
| RUBCNL   | -1.19743 | 0.934822 | -3.95841 | 0.000108  | 0.009015 | 1.031676 |
| RNF166   | -1.05922 | 2.411873 | -3.95073 | 0.000112  | 0.009228 | 1.004768 |
| GPR65    | -1.07736 | 0.996651 | -3.93488 | 0.000119  | 0.00968  | 0.949343 |
| FAM49A   | -1.35087 | 1.907901 | -3.93383 | 0.000119  | 0.00968  | 0.94571  |

|           |          |          |          |          |          |          |
|-----------|----------|----------|----------|----------|----------|----------|
| EOMES     | -1.02337 | 0.550118 | -3.92998 | 0.000121 | 0.009783 | 0.932255 |
| C19orf38  | -1.07853 | 1.222025 | -3.9122  | 0.000129 | 0.010341 | 0.870405 |
| TLR1      | -1.11146 | 1.512327 | -3.86146 | 0.000157 | 0.012053 | 0.695118 |
| CD180     | -1.37059 | 1.093215 | -3.85731 | 0.000159 | 0.012165 | 0.680859 |
| CSF3R     | -1.50373 | 1.525931 | -3.84775 | 0.000165 | 0.012431 | 0.648095 |
| TRAF1     | -1.16675 | 1.972102 | -3.84048 | 0.00017  | 0.012657 | 0.623192 |
| LRRC25    | -1.45172 | 2.012722 | -3.83416 | 0.000174 | 0.012822 | 0.601592 |
| WDFY4     | -1.48629 | 1.063431 | -3.83338 | 0.000174 | 0.012822 | 0.598943 |
| PERP      | 1.673863 | 6.10352  | 3.829411 | 0.000177 | 0.012916 | 0.585391 |
| NFAM1     | -1.30003 | 1.738313 | -3.81765 | 0.000185 | 0.013243 | 0.545314 |
| TNFAIP8L2 | -1.55995 | 2.199493 | -3.81071 | 0.00019  | 0.013496 | 0.52172  |
| PLXNA2    | 1.117304 | 2.737373 | 3.79245  | 0.000203 | 0.014219 | 0.459811 |
| BCL11A    | -1.01907 | 0.726188 | -3.77322 | 0.000218 | 0.015076 | 0.394893 |
| CR1       | -1.03003 | 0.495877 | -3.76027 | 0.000229 | 0.015595 | 0.351313 |
| PSTPIP2   | -1.19712 | 1.692729 | -3.73655 | 0.00025  | 0.016845 | 0.271854 |
| ADAMTS10  | -1.32335 | 1.972843 | -3.7228  | 0.000263 | 0.017643 | 0.225971 |
| STX11     | -1.13779 | 1.573246 | -3.72209 | 0.000264 | 0.017643 | 0.223626 |
| TP53      | -1.20605 | 1.173448 | -3.7138  | 0.000272 | 0.01794  | 0.196022 |
| MCOLN2    | -1.08447 | 0.824295 | -3.70576 | 0.00028  | 0.018166 | 0.16932  |
| IL12RB1   | -1.01859 | 1.094602 | -3.67975 | 0.000308 | 0.019648 | 0.083283 |
| PIK3R5    | -1.30725 | 1.416306 | -3.67717 | 0.000311 | 0.019758 | 0.074776 |
| DOCK2     | -1.46722 | 1.531073 | -3.67639 | 0.000312 | 0.019758 | 0.072232 |
| LAIR1     | -1.51936 | 2.160242 | -3.67193 | 0.000317 | 0.019867 | 0.057536 |
| SMIM22    | 1.957261 | 4.727291 | 3.671301 | 0.000318 | 0.019867 | 0.055458 |
| ATG16L2   | -1.12311 | 1.897917 | -3.67002 | 0.000319 | 0.019877 | 0.05125  |
| S100P     | 4.532104 | 6.526922 | 3.66181  | 0.000329 | 0.020197 | 0.024253 |
| CCL4L2    | -1.53545 | 1.539281 | -3.66078 | 0.00033  | 0.020197 | 0.020884 |
| HVCN1     | -1.27166 | 1.617675 | -3.64876 | 0.000345 | 0.020949 | -0.01854 |
| APOBR     | -1.35819 | 2.485205 | -3.64322 | 0.000352 | 0.02124  | -0.03668 |
| FAM78A    | -1.28984 | 1.48049  | -3.62867 | 0.000371 | 0.021675 | -0.08415 |
| PLCB2     | -1.51326 | 2.133986 | -3.58667 | 0.000431 | 0.024469 | -0.22034 |
| DNASE1L3  | -1.19217 | 0.574344 | -3.58615 | 0.000432 | 0.024469 | -0.22201 |
| CD84      | -1.36781 | 1.422977 | -3.58231 | 0.000438 | 0.024591 | -0.23441 |
| PALD1     | -1.21078 | 2.266572 | -3.57924 | 0.000443 | 0.024735 | -0.24429 |
| CHI3L2    | -1.35008 | 0.966065 | -3.57112 | 0.000456 | 0.02501  | -0.27043 |
| FAM83E    | 2.406399 | 3.922469 | 3.568252 | 0.00046  | 0.025109 | -0.27963 |
| DOCK8     | -1.33026 | 1.722185 | -3.56762 | 0.000461 | 0.025109 | -0.28165 |
| AMTN      | -1.5686  | 0.580396 | -3.56422 | 0.000467 | 0.025201 | -0.29256 |
| RNF144B   | -1.0779  | 2.241565 | -3.56095 | 0.000472 | 0.025354 | -0.30305 |
| REBP      | -1.36819 | 2.670714 | -3.54903 | 0.000493 | 0.026088 | -0.34125 |
| PIK3CD    | -1.30891 | 2.095466 | -3.54386 | 0.000502 | 0.026354 | -0.35776 |
| CAPN8     | 2.947615 | 4.049022 | 3.516112 | 0.000554 | 0.028678 | -0.44605 |
| NCF1      | -1.2156  | 0.984382 | -3.5098  | 0.000566 | 0.029166 | -0.46606 |
| MYO1G     | -1.13298 | 1.26331  | -3.49397 | 0.000598 | 0.030347 | -0.51608 |
| MAP3K8    | -1.13298 | 2.227833 | -3.49115 | 0.000604 | 0.030554 | -0.52496 |
| CAMK1D    | -1.19789 | 1.984038 | -3.49053 | 0.000606 | 0.030554 | -0.52691 |
| IRF1      | 2.65291  | 3.403888 | 3.465187 | 0.000662 | 0.032952 | -0.60653 |
| MUC13     | 2.951292 | 5.151257 | 3.463748 | 0.000665 | 0.033032 | -0.61103 |
| RAB42     | -1.06933 | 1.466679 | -3.45897 | 0.000676 | 0.033372 | -0.62597 |
| PSTPIP1   | -1.09589 | 1.292481 | -3.44681 | 0.000705 | 0.034503 | -0.66395 |

|          |          |          |          |          |          |          |
|----------|----------|----------|----------|----------|----------|----------|
| STEAP2   | 1.101423 | 2.576224 | 3.443053 | 0.000715 | 0.034867 | -0.67564 |
| SPN      | -1.29989 | 1.506878 | -3.43763 | 0.000728 | 0.035349 | -0.69252 |
| TLR10    | -1.24859 | 0.591108 | -3.43587 | 0.000733 | 0.03546  | -0.69798 |
| KCNAB2   | -1.11811 | 2.041968 | -3.43528 | 0.000734 | 0.03546  | -0.69984 |
| BIN2     | -1.32112 | 1.726731 | -3.42682 | 0.000756 | 0.036331 | -0.7261  |
| IFFO1    | -1.01726 | 2.256532 | -3.42096 | 0.000771 | 0.036981 | -0.74424 |
| SIGLEC10 | -1.53414 | 1.912802 | -3.41875 | 0.000777 | 0.037079 | -0.75108 |
| POU2F2   | -1.07744 | 0.94003  | -3.41279 | 0.000794 | 0.037478 | -0.7695  |
| NRROS    | -1.08395 | 1.42659  | -3.40862 | 0.000805 | 0.037742 | -0.78239 |
| SERPINB5 | 2.520371 | 3.434883 | 3.402756 | 0.000821 | 0.038233 | -0.80049 |
| LCP2     | -1.34266 | 2.170879 | -3.3985  | 0.000833 | 0.038684 | -0.81358 |
| BAIAP2L2 | 2.382142 | 3.895569 | 3.396693 | 0.000839 | 0.038757 | -0.81916 |
| BCL2     | -1.18758 | 1.446044 | -3.3905  | 0.000857 | 0.0394   | -0.8382  |
| PDE7A    | -1.1766  | 2.268587 | -3.38701 | 0.000867 | 0.039685 | -0.84893 |
| SCNN1G   | -1.41262 | 0.739288 | -3.38538 | 0.000872 | 0.039728 | -0.85393 |
| TLCD1    | 1.151904 | 2.890138 | 3.383985 | 0.000876 | 0.039728 | -0.8582  |
| IGSF6    | -1.43799 | 2.175704 | -3.3761  | 0.0009   | 0.040514 | -0.88237 |
| SDR16C5  | 2.303876 | 3.061898 | 3.363417 | 0.00094  | 0.041631 | -0.92112 |
| CD300LF  | -1.41804 | 1.891238 | -3.35453 | 0.000969 | 0.042449 | -0.94821 |
| LAT2     | -1.24123 | 2.168763 | -3.34372 | 0.001005 | 0.043364 | -0.98105 |
| IRF2     | -1.24336 | 1.8576   | -3.34119 | 0.001014 | 0.043364 | -0.98873 |
| NPY1R    | -1.21467 | 0.971785 | -3.34079 | 0.001015 | 0.043364 | -0.98994 |
| KLHL6    | -1.24112 | 1.178263 | -3.33133 | 0.001048 | 0.044578 | -1.0186  |
| DOCK10   | -1.15718 | 1.443065 | -3.3216  | 0.001083 | 0.045867 | -1.04801 |
| SHANK3   | -1.05855 | 2.23681  | -3.31158 | 0.00112  | 0.047131 | -1.0782  |
| VAV3     | -1.1412  | 1.271273 | -3.30236 | 0.001155 | 0.048092 | -1.10592 |
| RASGRP1  | -1.21295 | 1.425864 | -3.29976 | 0.001166 | 0.048268 | -1.11371 |
| TLR8     | -1.01169 | 0.835723 | -3.29934 | 0.001167 | 0.048268 | -1.11496 |
| LILRB4   | -1.32439 | 1.743429 | -3.28337 | 0.001231 | 0.050418 | -1.16278 |
| FLI1     | -1.17165 | 1.706667 | -3.28316 | 0.001232 | 0.050418 | -1.16341 |
| RASAL3   | -1.39291 | 1.79006  | -3.27599 | 0.001262 | 0.051099 | -1.18481 |
| EPHB3    | 1.493113 | 2.877361 | 3.244436 | 0.001402 | 0.054799 | -1.27845 |
| CXorf21  | -1.07371 | 1.212769 | -3.24349 | 0.001406 | 0.05486  | -1.28124 |
| MSLN     | 3.733287 | 5.896286 | 3.236816 | 0.001438 | 0.055435 | -1.30095 |
| CD300C   | -1.00101 | 1.356099 | -3.23052 | 0.001468 | 0.056242 | -1.3195  |
| CELF2    | -1.37511 | 1.85905  | -3.22115 | 0.001514 | 0.057326 | -1.34706 |
| STYK1    | 1.379954 | 1.949745 | 3.218561 | 0.001527 | 0.057704 | -1.35465 |
| DOK2     | -1.32978 | 2.336376 | -3.21254 | 0.001558 | 0.058377 | -1.37231 |
| CDS1     | 1.181389 | 3.183767 | 3.211943 | 0.001561 | 0.058377 | -1.37406 |
| AOAH     | -1.4334  | 1.779706 | -3.20168 | 0.001614 | 0.059519 | -1.40409 |
| MYEOV    | 2.539241 | 3.323241 | 3.199384 | 0.001627 | 0.059663 | -1.41078 |
| TFF1     | 4.988691 | 7.529882 | 3.197445 | 0.001637 | 0.059663 | -1.41644 |
| CETP     | -1.01002 | 0.87353  | -3.19298 | 0.001661 | 0.060247 | -1.42945 |
| TFF2     | 4.431589 | 6.058127 | 3.191438 | 0.00167  | 0.060247 | -1.43395 |
| STX1A    | 1.552546 | 3.277815 | 3.191438 | 0.00167  | 0.060247 | -1.43395 |
| ARHGEF16 | 1.422491 | 3.402142 | 3.183333 | 0.001714 | 0.061292 | -1.45753 |
| TMEM273  | -1.08302 | 1.750032 | -3.17884 | 0.00174  | 0.061516 | -1.47058 |
| TRAF3IP3 | -1.14116 | 0.96654  | -3.17576 | 0.001757 | 0.061793 | -1.4795  |
| FCGR2B   | -1.02228 | 1.260825 | -3.17152 | 0.001782 | 0.062313 | -1.49179 |
| C1orf210 | 1.32334  | 3.494263 | 3.166507 | 0.001811 | 0.06311  | -1.50631 |

|           |          |          |          |          |          |          |
|-----------|----------|----------|----------|----------|----------|----------|
| MNDA      | -1.60172 | 2.446067 | -3.15992 | 0.00185  | 0.064075 | -1.52535 |
| CCL3L1    | -1.07563 | 1.00609  | -3.15963 | 0.001852 | 0.064075 | -1.52619 |
| PILRA     | -1.27432 | 2.287261 | -3.14781 | 0.001925 | 0.065755 | -1.56026 |
| EPS8L3    | 2.523512 | 4.250237 | 3.14627  | 0.001934 | 0.06585  | -1.56468 |
| GIMAP1    | -1.03134 | 1.368052 | -3.14548 | 0.001939 | 0.065902 | -1.56695 |
| PAPLN     | -1.25245 | 2.083255 | -3.13307 | 0.002019 | 0.068359 | -1.60257 |
| CLEC7A    | -1.21896 | 1.788413 | -3.12092 | 0.002099 | 0.070383 | -1.63733 |
| ZNF486    | -1.0546  | 1.336133 | -3.11707 | 0.002125 | 0.070981 | -1.64832 |
| ETV4      | 1.529234 | 3.102408 | 3.115193 | 0.002138 | 0.070985 | -1.65366 |
| C19orf33  | 2.956421 | 6.719931 | 3.109839 | 0.002175 | 0.071467 | -1.66891 |
| AQP5      | 3.13276  | 4.181649 | 3.107863 | 0.002189 | 0.071744 | -1.67454 |
| SLC15A3   | -1.18256 | 2.966613 | -3.09352 | 0.002292 | 0.07411  | -1.71525 |
| GPRC5A    | 2.751295 | 5.598289 | 3.089776 | 0.00232  | 0.074502 | -1.72585 |
| PLCG1     | 1.721044 | 3.820182 | 3.086516 | 0.002344 | 0.074615 | -1.73507 |
| IL27RA    | -1.00244 | 2.61824  | -3.08622 | 0.002346 | 0.074615 | -1.7359  |
| CD1D      | -1.17092 | 1.539477 | -3.08618 | 0.002346 | 0.074615 | -1.73601 |
| STEAP1    | 1.445222 | 3.705888 | 3.08154  | 0.002382 | 0.075433 | -1.74913 |
| GIMAP8    | -1.21779 | 1.994401 | -3.07904 | 0.002401 | 0.075711 | -1.75618 |
| MANSC1    | 1.018486 | 3.273489 | 3.077065 | 0.002416 | 0.07594  | -1.76175 |
| TOX3      | 1.339434 | 2.180353 | 3.070688 | 0.002465 | 0.077245 | -1.77971 |
| CCR1      | -1.30634 | 2.027739 | -3.06478 | 0.002512 | 0.078206 | -1.79633 |
| GALNT5    | 1.894807 | 2.779412 | 3.064759 | 0.002512 | 0.078206 | -1.79638 |
| CCL4      | -1.3012  | 1.793344 | -3.06422 | 0.002516 | 0.078214 | -1.7979  |
| FERMT1    | 1.664923 | 3.395695 | 3.061041 | 0.002542 | 0.078406 | -1.80682 |
| SLC2A6    | -1.03857 | 2.122444 | -3.05876 | 0.00256  | 0.078691 | -1.81321 |
| LRRN2     | -1.04716 | 1.333644 | -3.05423 | 0.002597 | 0.079324 | -1.82591 |
| CD86      | -1.28074 | 2.196421 | -3.04742 | 0.002654 | 0.08029  | -1.84497 |
| PPL       | 1.601911 | 4.185422 | 3.03791  | 0.002735 | 0.082094 | -1.87151 |
| BAIAP2    | 1.024611 | 2.702987 | 3.037293 | 0.00274  | 0.082126 | -1.87323 |
| IQANK1    | 1.413324 | 2.48084  | 3.03339  | 0.002774 | 0.082756 | -1.8841  |
| SFN       | 2.793027 | 6.19994  | 3.032575 | 0.002781 | 0.082841 | -1.88637 |
| PLEKHA6   | 1.218906 | 3.802962 | 3.025326 | 0.002846 | 0.083919 | -1.90652 |
| ITGA4     | -1.11266 | 1.339849 | -3.02057 | 0.002888 | 0.08459  | -1.9197  |
| PPP1R14D  | 2.086011 | 2.552903 | 3.019011 | 0.002903 | 0.084878 | -1.92404 |
| FCRL2     | -1.07104 | 0.394005 | -3.01812 | 0.002911 | 0.084985 | -1.92649 |
| VSIG2     | 2.810892 | 5.190837 | 3.01735  | 0.002918 | 0.085063 | -1.92864 |
| ZAP70     | -1.272   | 1.167883 | -3.01678 | 0.002923 | 0.085088 | -1.93023 |
| HIST2H2BE | 1.527689 | 3.49877  | 3.010237 | 0.002984 | 0.086071 | -1.94832 |
| PRKAR2B   | -1.17376 | 1.91674  | -2.98743 | 0.003204 | 0.091199 | -2.01115 |
| TMC4      | 1.354045 | 5.111578 | 2.98072  | 0.003272 | 0.092359 | -2.02955 |
| JAK3      | -1.16148 | 2.177506 | -2.97819 | 0.003297 | 0.092627 | -2.03647 |
| MAB21L4   | 1.540494 | 2.013164 | 2.973382 | 0.003347 | 0.093885 | -2.04963 |
| OVOL2     | 1.105518 | 2.308261 | 2.969316 | 0.00339  | 0.094801 | -2.06074 |
| CKMT1A    | 1.10017  | 1.458783 | 2.964774 | 0.003438 | 0.095866 | -2.07313 |
| GSDMC     | 1.826796 | 3.929475 | 2.962457 | 0.003462 | 0.096139 | -2.07945 |
| LAMA3     | 1.876476 | 3.885905 | 2.961821 | 0.003469 | 0.09619  | -2.08118 |
| FPR1      | -1.5078  | 2.556967 | -2.94897 | 0.00361  | 0.099372 | -2.11612 |
| SH2D3C    | -1.01073 | 2.146078 | -2.94358 | 0.00367  | 0.100136 | -2.13072 |
| FYB1      | -1.42648 | 2.147446 | -2.93954 | 0.003716 | 0.10072  | -2.14168 |
| PRKCB     | -1.23991 | 1.012945 | -2.93833 | 0.00373  | 0.100952 | -2.14493 |

|          |          |          |          |          |          |          |
|----------|----------|----------|----------|----------|----------|----------|
| TUFT1    | 1.155307 | 3.57482  | 2.932319 | 0.0038   | 0.102119 | -2.16118 |
| CBLC     | 1.704237 | 4.435955 | 2.930581 | 0.00382  | 0.102237 | -2.16588 |
| SAMSN1   | -1.27368 | 2.014304 | -2.92957 | 0.003832 | 0.102271 | -2.1686  |
| CYFIP2   | -1.1628  | 2.026328 | -2.92681 | 0.003864 | 0.102857 | -2.17605 |
| AREG     | 2.115515 | 3.769233 | 2.924916 | 0.003887 | 0.10317  | -2.18115 |
| SH3RF2   | 1.296353 | 2.408859 | 2.923887 | 0.003899 | 0.103354 | -2.18392 |
| TMEM125  | 1.171083 | 3.590633 | 2.917615 | 0.003975 | 0.104782 | -2.20079 |
| EBI3     | -1.18825 | 1.51157  | -2.90024 | 0.004191 | 0.108914 | -2.24736 |
| PSCA     | 4.090589 | 4.952495 | 2.89428  | 0.004268 | 0.1104   | -2.26327 |
| GZMH     | -1.32893 | 1.630726 | -2.89155 | 0.004304 | 0.111171 | -2.27055 |
| ARHGEF6  | -1.0885  | 2.037992 | -2.89086 | 0.004313 | 0.111255 | -2.27238 |
| TRPV2    | -1.06295 | 2.944888 | -2.88997 | 0.004324 | 0.111408 | -2.27476 |
| SYT13    | 1.758583 | 3.910811 | 2.88875  | 0.004341 | 0.111671 | -2.27801 |
| CKMT1B   | 1.120157 | 1.525855 | 2.887585 | 0.004356 | 0.111769 | -2.28111 |
| HSPB8    | -1.36295 | 2.889229 | -2.88484 | 0.004392 | 0.112159 | -2.28843 |
| CCR5     | -1.21141 | 1.536554 | -2.88476 | 0.004393 | 0.112159 | -2.28862 |
| TNFSF8   | -1.07436 | 0.932272 | -2.88375 | 0.004407 | 0.112182 | -2.29132 |
| AGR3     | 2.450536 | 4.396762 | 2.881638 | 0.004435 | 0.112615 | -2.29693 |
| TNS4     | 2.580521 | 3.529673 | 2.88047  | 0.004451 | 0.112707 | -2.30003 |
| SLC37A2  | -1.08549 | 1.679495 | -2.87509 | 0.004524 | 0.113516 | -2.31431 |
| KLRB1    | -1.4047  | 1.835549 | -2.87416 | 0.004537 | 0.113685 | -2.31676 |
| GLIPR1   | -1.11694 | 2.338643 | -2.8734  | 0.004547 | 0.113801 | -2.3188  |
| GNG7     | -1.20735 | 1.884914 | -2.8628  | 0.004695 | 0.116007 | -2.34682 |
| TNF      | -1.03215 | 1.970844 | -2.86234 | 0.004702 | 0.116007 | -2.34805 |
| GOLT1A   | 1.307242 | 2.704399 | 2.859886 | 0.004737 | 0.116127 | -2.35453 |
| BAIAP2L1 | 1.377532 | 4.47948  | 2.857721 | 0.004768 | 0.116731 | -2.36024 |
| SDC1     | 1.762254 | 6.479449 | 2.853803 | 0.004824 | 0.11764  | -2.37056 |
| SLPI     | 2.373393 | 7.756588 | 2.853483 | 0.004829 | 0.11764  | -2.37141 |
| HAVCR2   | -1.22527 | 2.431438 | -2.84324 | 0.00498  | 0.119879 | -2.39833 |
| KRT8     | 1.546078 | 8.282877 | 2.842202 | 0.004995 | 0.119879 | -2.40106 |
| COL17A1  | 3.005202 | 4.345785 | 2.841083 | 0.005012 | 0.119879 | -2.404   |
| PYGB     | 1.232825 | 5.954027 | 2.835996 | 0.005089 | 0.120561 | -2.41733 |
| NMU      | 2.116493 | 2.617234 | 2.835767 | 0.005093 | 0.120561 | -2.41793 |
| TRIM15   | 1.774713 | 2.554413 | 2.832402 | 0.005144 | 0.121484 | -2.42674 |
| ATP1B1   | 1.319412 | 7.241751 | 2.825994 | 0.005244 | 0.122632 | -2.44348 |
| SEZ6L2   | 1.160552 | 4.637596 | 2.815253 | 0.005415 | 0.125558 | -2.47147 |
| SLC4A11  | 1.457142 | 2.230501 | 2.808932 | 0.005517 | 0.127568 | -2.4879  |
| TM4SF5   | 2.407407 | 3.54129  | 2.80453  | 0.00559  | 0.128391 | -2.49932 |
| IKZF1    | -1.23636 | 1.332332 | -2.79139 | 0.005812 | 0.131765 | -2.5333  |
| ZG16B    | 2.021161 | 3.191195 | 2.789329 | 0.005848 | 0.132106 | -2.53862 |
| CHIT1    | -1.70105 | 1.339481 | -2.78256 | 0.005966 | 0.134145 | -2.55606 |
| PLA2G7   | -1.41438 | 2.324357 | -2.78083 | 0.005996 | 0.134363 | -2.56052 |
| TMEM54   | 1.154321 | 5.64707  | 2.77768  | 0.006052 | 0.13499  | -2.56862 |
| CLRN3    | 2.053469 | 2.738093 | 2.767315 | 0.00624  | 0.138055 | -2.59521 |
| ESRP2    | 1.089543 | 2.944604 | 2.765967 | 0.006265 | 0.138286 | -2.59866 |
| RASL11B  | -1.05294 | 1.724215 | -2.76091 | 0.006359 | 0.13908  | -2.61158 |
| NLRC4    | 2.626986 | 4.076057 | 2.758711 | 0.0064   | 0.139192 | -2.61721 |
| FMNL1    | -1.05272 | 2.558248 | -2.75521 | 0.006466 | 0.139838 | -2.62613 |
| PITX1    | 1.904083 | 2.724011 | 2.753284 | 0.006502 | 0.140473 | -2.63105 |
| CDHR5    | 2.027152 | 2.956126 | 2.751175 | 0.006543 | 0.141027 | -2.63643 |

|           |          |          |          |          |          |          |
|-----------|----------|----------|----------|----------|----------|----------|
| BCAS1     | 1.879451 | 2.861526 | 2.748191 | 0.0066   | 0.142105 | -2.64402 |
| SP140     | -1.03033 | 0.957736 | -2.74466 | 0.006669 | 0.142625 | -2.65301 |
| TRIM29    | 2.366632 | 3.585312 | 2.739793 | 0.006764 | 0.143629 | -2.66536 |
| AKAP7     | -1.31285 | 1.945418 | -2.73961 | 0.006768 | 0.143629 | -2.66584 |
| CCL3      | -1.11105 | 1.623692 | -2.73319 | 0.006896 | 0.145382 | -2.6821  |
| SMAGP     | 1.137472 | 3.181393 | 2.725406 | 0.007054 | 0.148098 | -2.70178 |
| GPR34     | -1.29232 | 1.993125 | -2.72533 | 0.007055 | 0.148098 | -2.70198 |
| TMEM30B   | 1.088929 | 3.995396 | 2.722599 | 0.007111 | 0.148614 | -2.70887 |
| SIGLEC14  | -1.22674 | 1.354209 | -2.71289 | 0.007315 | 0.150192 | -2.73333 |
| IRF6      | 1.166223 | 4.446178 | 2.702541 | 0.007537 | 0.152879 | -2.7593  |
| CDCP1     | 1.233773 | 4.053172 | 2.70083  | 0.007574 | 0.153476 | -2.76359 |
| IQGAP3    | 1.232842 | 2.112166 | 2.696899 | 0.007661 | 0.154577 | -2.77342 |
| MUC5B     | 2.544291 | 3.210792 | 2.691402 | 0.007783 | 0.15652  | -2.78716 |
| CYSTM1    | 1.375992 | 6.391773 | 2.691398 | 0.007783 | 0.15652  | -2.78717 |
| ASPHD1    | 1.290041 | 3.396751 | 2.690721 | 0.007798 | 0.156534 | -2.78886 |
| SPINT2    | 1.120525 | 6.751568 | 2.687463 | 0.007872 | 0.157353 | -2.79698 |
| HIST1H1C  | 1.572258 | 5.772911 | 2.671809 | 0.008234 | 0.162377 | -2.8359  |
| SLAMF8    | -1.2573  | 2.661274 | -2.67149 | 0.008241 | 0.162377 | -2.83669 |
| ARL14     | 2.255795 | 3.939378 | 2.664239 | 0.008414 | 0.164604 | -2.85465 |
| TAGAP     | -1.12946 | 1.564343 | -2.66286 | 0.008447 | 0.164921 | -2.85805 |
| KDELR3    | 1.165025 | 4.435358 | 2.661589 | 0.008478 | 0.165351 | -2.8612  |
| JAML      | -1.09722 | 1.711874 | -2.66037 | 0.008507 | 0.165426 | -2.86422 |
| MYH14     | 1.411382 | 4.968232 | 2.65654  | 0.008601 | 0.166739 | -2.87367 |
| ECT2      | 1.052246 | 2.707372 | 2.650229 | 0.008757 | 0.168918 | -2.88921 |
| CEACAM5   | 3.904918 | 5.917084 | 2.649376 | 0.008778 | 0.169157 | -2.89131 |
| AK4       | 1.195213 | 2.209801 | 2.643647 | 0.008922 | 0.170108 | -2.90539 |
| IL2RB     | -1.0571  | 1.676988 | -2.64356 | 0.008925 | 0.170108 | -2.90562 |
| HIST1H2BC | 1.277395 | 2.037065 | 2.641825 | 0.008969 | 0.170734 | -2.90987 |
| ACSM3     | -1.06319 | 1.609952 | -2.6319  | 0.009225 | 0.173796 | -2.93418 |
| SUSD3     | -1.08169 | 1.753501 | -2.6314  | 0.009238 | 0.173843 | -2.93541 |
| CORO2A    | 1.34971  | 3.386274 | 2.625637 | 0.00939  | 0.176013 | -2.94948 |
| CD247     | -1.02996 | 1.288699 | -2.6245  | 0.00942  | 0.176067 | -2.95226 |
| TSTA3     | 1.134247 | 5.343461 | 2.615958 | 0.00965  | 0.179154 | -2.97306 |
| ANKS4B    | 1.324711 | 1.667027 | 2.613562 | 0.009715 | 0.179771 | -2.97888 |
| PHLDA2    | 2.012052 | 4.862767 | 2.613217 | 0.009725 | 0.179771 | -2.97972 |
| NOD1      | 1.49288  | 3.723495 | 2.608652 | 0.009851 | 0.180095 | -2.9908  |
| TSPAN8    | 2.347181 | 6.55077  | 2.602412 | 0.010025 | 0.182749 | -3.00592 |
| ID1       | 1.571531 | 5.863948 | 2.601764 | 0.010043 | 0.182749 | -3.00749 |
| MUCL3     | 3.355299 | 4.056973 | 2.596332 | 0.010197 | 0.185206 | -3.02061 |
| ADGRF1    | 1.256589 | 1.676143 | 2.593611 | 0.010275 | 0.18625  | -3.02718 |
| TPSAB1    | 1.351121 | 3.177492 | 2.591952 | 0.010323 | 0.186264 | -3.03118 |
| SLC6A8    | 1.497744 | 3.807262 | 2.586131 | 0.010493 | 0.18809  | -3.04521 |
| RAPGEFL1  | 1.65316  | 3.213684 | 2.582837 | 0.01059  | 0.188351 | -3.05313 |
| HNF4A     | 1.190828 | 3.086836 | 2.582706 | 0.010594 | 0.188351 | -3.05344 |
| STARD10   | 1.042007 | 4.744593 | 2.581992 | 0.010615 | 0.188351 | -3.05516 |
| ADCY5     | -1.00154 | 1.550345 | -2.57717 | 0.010759 | 0.189852 | -3.06672 |
| SLC39A4   | 1.504142 | 3.176612 | 2.574384 | 0.010843 | 0.190709 | -3.07341 |
| FCGR3B    | -1.07118 | 0.792297 | -2.57424 | 0.010847 | 0.190709 | -3.07374 |
| GZMM      | -1.10869 | 1.311501 | -2.57307 | 0.010882 | 0.190809 | -3.07655 |
| HRASLS2   | 1.827494 | 2.247299 | 2.569133 | 0.011002 | 0.192054 | -3.08598 |

|          |          |          |          |          |          |          |
|----------|----------|----------|----------|----------|----------|----------|
| EVPL     | 1.616394 | 3.193904 | 2.567871 | 0.011041 | 0.192541 | -3.089   |
| GCNT3    | 2.043299 | 4.204002 | 2.566856 | 0.011072 | 0.192737 | -3.09142 |
| EPHA2    | 1.691633 | 5.035453 | 2.559048 | 0.011315 | 0.194009 | -3.11005 |
| EVI2A    | -1.19837 | 2.384982 | -2.559   | 0.011316 | 0.194009 | -3.11017 |
| CYP2C18  | 1.639669 | 2.296978 | 2.553588 | 0.011487 | 0.195204 | -3.12305 |
| AOC1     | 1.984035 | 4.021138 | 2.550472 | 0.011587 | 0.196203 | -3.13046 |
| SEMA4G   | 1.213442 | 2.906316 | 2.547707 | 0.011676 | 0.197189 | -3.13702 |
| GPX2     | 2.24774  | 6.923819 | 2.546007 | 0.011731 | 0.197771 | -3.14105 |
| HTR1D    | 1.094691 | 1.457604 | 2.543156 | 0.011824 | 0.198466 | -3.14781 |
| ITGA3    | 1.384617 | 5.304145 | 2.541937 | 0.011863 | 0.198657 | -3.15069 |
| KRT18    | 1.351603 | 7.846318 | 2.541548 | 0.011876 | 0.198657 | -3.15162 |
| ATP2C2   | 1.077761 | 1.768296 | 2.5382   | 0.011986 | 0.199693 | -3.15954 |
| OSCAR    | -1.10664 | 2.240498 | -2.53784 | 0.011998 | 0.199693 | -3.16038 |
| C6orf132 | 1.125902 | 2.8337   | 2.53491  | 0.012095 | 0.20024  | -3.16731 |
| TRIM31   | 1.922296 | 2.912943 | 2.526812 | 0.012368 | 0.20249  | -3.18641 |
| SPIRE2   | 1.172926 | 1.997319 | 2.525952 | 0.012397 | 0.202758 | -3.18844 |
| TLR2     | -1.00768 | 2.549985 | -2.51323 | 0.012837 | 0.206741 | -3.21831 |
| PLCD3    | 1.247272 | 3.284774 | 2.512034 | 0.012879 | 0.207167 | -3.22112 |
| NGEF     | 1.092006 | 2.263525 | 2.511224 | 0.012908 | 0.207323 | -3.22301 |
| KLK11    | 1.92882  | 3.531978 | 2.500086 | 0.013307 | 0.212267 | -3.24904 |
| DMBT1    | 2.774281 | 3.54291  | 2.496004 | 0.013455 | 0.213756 | -3.25855 |
| TMC7     | 1.018567 | 1.941467 | 2.495018 | 0.013492 | 0.21388  | -3.26084 |
| IL16     | -1.00178 | 1.46709  | -2.48803 | 0.01375  | 0.215596 | -3.27708 |
| FA2H     | 1.595493 | 3.75155  | 2.48706  | 0.013787 | 0.215816 | -3.27934 |
| CEACAM1  | 1.294036 | 3.599048 | 2.482218 | 0.013969 | 0.217258 | -3.29056 |
| AMN      | 1.662884 | 2.377541 | 2.478897 | 0.014095 | 0.218166 | -3.29825 |
| KCNN4    | 1.889996 | 4.55898  | 2.476663 | 0.014181 | 0.218612 | -3.30341 |
| CRTAC1   | -1.03582 | 1.267412 | -2.47071 | 0.014411 | 0.22055  | -3.31717 |
| AADAC    | 1.634972 | 2.136183 | 2.467514 | 0.014536 | 0.221956 | -3.32452 |
| FAM129C  | -1.09026 | 0.47697  | -2.46437 | 0.01466  | 0.222512 | -3.33176 |
| SLCO2B1  | -1.16352 | 2.832056 | -2.46087 | 0.014799 | 0.223763 | -3.3398  |
| NLRP3    | 2.784323 | 4.635135 | 2.451079 | 0.015194 | 0.227128 | -3.36226 |
| OVOL1    | 1.077584 | 1.52023  | 2.447703 | 0.015332 | 0.228184 | -3.36999 |
| LSR      | 1.183113 | 6.562062 | 2.447646 | 0.015335 | 0.228184 | -3.37012 |
| ITGAM    | -1.03296 | 2.413058 | -2.44662 | 0.015377 | 0.228634 | -3.37245 |
| SIGLEC1  | -1.04523 | 1.584516 | -2.4462  | 0.015394 | 0.228717 | -3.37342 |
| TMPRSS3  | 1.348987 | 3.089397 | 2.443736 | 0.015496 | 0.229702 | -3.37905 |
| ITIH5    | -1.10481 | 2.14831  | -2.44291 | 0.015531 | 0.229966 | -3.38094 |
| PLA2G10  | 1.466295 | 2.044724 | 2.442698 | 0.015539 | 0.229966 | -3.38142 |
| CMKLR1   | -1.00873 | 1.840774 | -2.44094 | 0.015613 | 0.230364 | -3.38542 |
| MBOAT2   | 1.013546 | 3.029598 | 2.438992 | 0.015694 | 0.231394 | -3.38987 |
| C3AR1    | -1.26405 | 2.98097  | -2.43765 | 0.015751 | 0.231997 | -3.39292 |
| EFNA1    | 1.271386 | 5.331603 | 2.435459 | 0.015843 | 0.231997 | -3.39791 |
| RUNX3    | -1.15552 | 2.084979 | -2.43545 | 0.015844 | 0.231997 | -3.39792 |
| SPIB     | -1.37635 | 1.467879 | -2.4277  | 0.016175 | 0.235314 | -3.41555 |
| GIMAP6   | -1.10921 | 2.33749  | -2.4273  | 0.016192 | 0.235314 | -3.41644 |
| KRT15    | 1.196103 | 1.678607 | 2.425433 | 0.016273 | 0.235957 | -3.42068 |
| MUC5AC   | 2.649871 | 3.195506 | 2.417481 | 0.016622 | 0.238316 | -3.43868 |
| PI3      | 2.502529 | 4.730764 | 2.415726 | 0.016699 | 0.238544 | -3.44264 |
| P2RY8    | -1.04372 | 1.546545 | -2.4153  | 0.016718 | 0.23864  | -3.44361 |

|           |          |          |          |          |          |          |
|-----------|----------|----------|----------|----------|----------|----------|
| FGFBP1    | 1.905455 | 2.339972 | 2.413087 | 0.016817 | 0.239335 | -3.4486  |
| AKR7A3    | 1.69571  | 3.522874 | 2.412306 | 0.016852 | 0.239396 | -3.45036 |
| ANLN      | 1.129465 | 2.222164 | 2.412158 | 0.016858 | 0.239396 | -3.45069 |
| CEMIP     | 1.539322 | 2.928196 | 2.407747 | 0.017057 | 0.241148 | -3.46063 |
| MROH6     | 1.472933 | 2.948907 | 2.405418 | 0.017162 | 0.242112 | -3.46587 |
| KCNJ5     | -1.05156 | 1.078706 | -2.40536 | 0.017165 | 0.242112 | -3.46601 |
| MS4A6A    | -1.20314 | 2.953383 | -2.40339 | 0.017255 | 0.243059 | -3.47044 |
| KLK6      | 2.608809 | 3.833298 | 2.400357 | 0.017394 | 0.244271 | -3.47724 |
| FOSL1     | 1.544576 | 3.405555 | 2.399561 | 0.017431 | 0.244271 | -3.47903 |
| FOXA1     | 1.071886 | 1.603711 | 2.399513 | 0.017433 | 0.244271 | -3.47914 |
| TMEM92    | 1.260573 | 2.802108 | 2.399303 | 0.017442 | 0.244271 | -3.47961 |
| EPS8L2    | 1.060106 | 4.505732 | 2.398175 | 0.017495 | 0.244725 | -3.48214 |
| CDHR2     | 1.80481  | 2.892204 | 2.397829 | 0.017511 | 0.244725 | -3.48292 |
| IHH       | 1.830813 | 2.390936 | 2.394907 | 0.017646 | 0.245875 | -3.48947 |
| XDH       | 1.237595 | 2.006858 | 2.393255 | 0.017723 | 0.246415 | -3.49316 |
| CRYBG2    | 1.236753 | 2.031705 | 2.392344 | 0.017766 | 0.246653 | -3.4952  |
| F2RL1     | 1.208401 | 4.478909 | 2.390669 | 0.017845 | 0.247388 | -3.49895 |
| GALNT12   | 1.120978 | 3.498099 | 2.390051 | 0.017874 | 0.24748  | -3.50033 |
| CLDN7     | 1.199736 | 5.591151 | 2.385808 | 0.018075 | 0.248611 | -3.50981 |
| HIST1H4I  | 1.002677 | 2.631677 | 2.385407 | 0.018094 | 0.248696 | -3.51071 |
| LMO7      | 1.026678 | 3.760727 | 2.379851 | 0.018361 | 0.251202 | -3.52309 |
| MMP28     | 1.478476 | 3.759104 | 2.371269 | 0.018779 | 0.254289 | -3.54217 |
| HIST1H2BK | 1.237727 | 5.358914 | 2.364638 | 0.019108 | 0.256592 | -3.55687 |
| SIT1      | -1.18279 | 1.393868 | -2.35998 | 0.019342 | 0.258654 | -3.56717 |
| ALG1L     | 1.20567  | 1.600266 | 2.356984 | 0.019494 | 0.259971 | -3.57378 |
| PDLIM3    | -1.12934 | 2.793494 | -2.35034 | 0.019834 | 0.262573 | -3.58842 |
| SLC1A3    | -1.02707 | 1.778049 | -2.34263 | 0.020237 | 0.266367 | -3.60537 |
| TRNP1     | 1.319497 | 4.812088 | 2.342068 | 0.020266 | 0.26639  | -3.6066  |
| GJB5      | 1.707743 | 2.123112 | 2.341154 | 0.020314 | 0.26669  | -3.6086  |
| SCEL      | 1.575443 | 2.190472 | 2.339564 | 0.020398 | 0.267035 | -3.61209 |
| GSDME     | 1.040202 | 6.208546 | 2.339185 | 0.020418 | 0.267117 | -3.61292 |
| LRRC66    | 1.17617  | 1.502901 | 2.332823 | 0.020758 | 0.269547 | -3.62684 |
| S100A14   | 2.210407 | 6.4625   | 2.332051 | 0.0208   | 0.269603 | -3.62853 |
| ITGA6     | 1.077943 | 5.254581 | 2.324076 | 0.021233 | 0.27205  | -3.64593 |
| CREB3L1   | 1.393182 | 4.947726 | 2.319293 | 0.021497 | 0.274341 | -3.65633 |
| ELF3      | 1.511303 | 5.834647 | 2.319098 | 0.021508 | 0.274341 | -3.65676 |
| S1PR4     | -1.06424 | 1.848913 | -2.31368 | 0.02181  | 0.276543 | -3.66852 |
| F12       | 1.04272  | 1.879898 | 2.310104 | 0.022012 | 0.278144 | -3.67627 |
| CSF2RB    | -1.12286 | 2.134882 | -2.29567 | 0.022843 | 0.282078 | -3.70744 |
| S100A10   | 1.182722 | 8.171254 | 2.293893 | 0.022947 | 0.282642 | -3.71126 |
| ABO       | 1.341263 | 2.422669 | 2.290938 | 0.023121 | 0.283241 | -3.71761 |
| INAVA     | 1.351225 | 3.575303 | 2.289805 | 0.023188 | 0.283882 | -3.72004 |
| CLDN4     | 1.55861  | 6.178514 | 2.288019 | 0.023294 | 0.284785 | -3.72388 |
| LPCAT4    | 1.227567 | 4.543175 | 2.286247 | 0.0234   | 0.285332 | -3.72768 |
| SLC6A14   | 1.849393 | 3.058517 | 2.283996 | 0.023534 | 0.285765 | -3.73251 |
| CTSE      | 2.677685 | 7.182188 | 2.283392 | 0.023571 | 0.285844 | -3.7338  |
| MIA       | 1.965957 | 2.651838 | 2.281923 | 0.023659 | 0.286377 | -3.73694 |
| CA9       | 2.558027 | 4.005191 | 2.279364 | 0.023814 | 0.287347 | -3.74242 |
| GPR35     | 1.239291 | 2.627151 | 2.271684 | 0.024284 | 0.289751 | -3.75881 |
| CYTIP     | -1.11343 | 2.362492 | -2.26909 | 0.024444 | 0.290406 | -3.76434 |



|           |          |          |          |          |          |          |
|-----------|----------|----------|----------|----------|----------|----------|
| SDCBP2    | 1.452614 | 4.747241 | 2.264672 | 0.02472  | 0.2926   | -3.77374 |
| FAM83A    | 1.829871 | 2.129048 | 2.258901 | 0.025084 | 0.295637 | -3.78599 |
| CRACR2B   | 1.347856 | 3.388587 | 2.258305 | 0.025122 | 0.295902 | -3.78725 |
| HIST1H2AC | 1.10412  | 4.506357 | 2.256752 | 0.025221 | 0.296082 | -3.79054 |
| FAM3D     | 2.284956 | 3.605048 | 2.254478 | 0.025366 | 0.296871 | -3.79536 |
| RNF39     | 1.157903 | 2.194566 | 2.250399 | 0.025629 | 0.298949 | -3.80399 |
| ENTPD8    | 1.290208 | 1.78448  | 2.249346 | 0.025697 | 0.299486 | -3.80621 |
| ALDH3A1   | 1.450366 | 1.763722 | 2.2492   | 0.025706 | 0.299486 | -3.80652 |
| RASAL1    | 1.085903 | 2.436648 | 2.24771  | 0.025803 | 0.300193 | -3.80966 |
| UGT1A10   | 1.527844 | 1.949856 | 2.231883 | 0.026851 | 0.307803 | -3.84295 |
| LYVE1     | -1.05815 | 1.362249 | -2.23042 | 0.02695  | 0.30857  | -3.84602 |
| RFLNA     | 1.439718 | 3.228775 | 2.227823 | 0.027126 | 0.309846 | -3.85146 |
| ST6GALNA  | 1.698747 | 3.523518 | 2.224941 | 0.027322 | 0.311721 | -3.85748 |
| LYPD1     | -1.10075 | 1.711399 | -2.22271 | 0.027475 | 0.312658 | -3.86214 |
| LEMD1     | 1.327157 | 2.020189 | 2.214451 | 0.028048 | 0.315844 | -3.87936 |
| PRSS3     | 2.200226 | 5.027826 | 2.205978 | 0.028646 | 0.319255 | -3.89696 |
| ALKAL2    | -1.21605 | 1.351751 | -2.20242 | 0.0289   | 0.320431 | -3.90433 |
| DDC       | 1.475118 | 1.750692 | 2.20085  | 0.029013 | 0.321424 | -3.90758 |
| VILL      | 1.517724 | 3.949155 | 2.197837 | 0.029231 | 0.322246 | -3.91381 |
| CLDN18    | 3.140873 | 4.827072 | 2.195684 | 0.029388 | 0.32314  | -3.91826 |
| CAVIN2    | -1.08182 | 2.521697 | -2.19557 | 0.029396 | 0.32314  | -3.9185  |
| AKR1B10   | 2.187531 | 3.640307 | 2.194634 | 0.029464 | 0.323704 | -3.92042 |
| GDA       | 1.168233 | 2.527319 | 2.190721 | 0.029751 | 0.325077 | -3.92849 |
| MS4A8     | 1.543328 | 2.184849 | 2.189655 | 0.02983  | 0.325596 | -3.93069 |
| MSR1      | -1.08234 | 2.369415 | -2.18254 | 0.030359 | 0.327318 | -3.94531 |
| SLCO4A1   | 1.29894  | 2.686097 | 2.182424 | 0.030368 | 0.327318 | -3.94555 |
| PLA2G16   | 1.051453 | 4.904272 | 2.18033  | 0.030525 | 0.328062 | -3.94984 |
| LGALS4    | 2.321921 | 6.766794 | 2.179841 | 0.030562 | 0.328112 | -3.95085 |
| SLC11A1   | -1.00407 | 2.046973 | -2.16973 | 0.031332 | 0.33138  | -3.97154 |
| B4GALNT3  | 1.049165 | 3.574495 | 2.165514 | 0.031658 | 0.33294  | -3.98013 |
| NPC1L1    | 1.371843 | 2.644674 | 2.16124  | 0.031992 | 0.335046 | -3.98883 |
| CCDC69    | -1.03479 | 2.665343 | -2.15941 | 0.032136 | 0.335529 | -3.99255 |
| MET       | 1.247284 | 4.156663 | 2.156498 | 0.032366 | 0.337188 | -3.99846 |
| C4BPB     | 1.252371 | 1.960204 | 2.154012 | 0.032563 | 0.337722 | -4.0035  |
| TFF3      | 2.648285 | 5.981215 | 2.14845  | 0.033009 | 0.339965 | -4.01476 |
| CAPN9     | 1.708454 | 2.217362 | 2.146262 | 0.033185 | 0.341056 | -4.01918 |
| SPINK5    | 1.005719 | 1.280839 | 2.134012 | 0.03419  | 0.345846 | -4.04387 |
| CYP4F3    | 1.123151 | 1.78755  | 2.132948 | 0.034278 | 0.346194 | -4.046   |
| GALE      | 1.028311 | 4.045716 | 2.13134  | 0.034412 | 0.347184 | -4.04923 |
| MGST1     | 1.007998 | 3.013896 | 2.127136 | 0.034765 | 0.349096 | -4.05766 |
| SHH       | 1.161245 | 1.957059 | 2.124936 | 0.03495  | 0.350049 | -4.06206 |
| CD1C      | -1.18907 | 1.94333  | -2.12341 | 0.03508  | 0.350616 | -4.06512 |
| FOXL1     | 1.32315  | 2.709618 | 2.120571 | 0.035322 | 0.351392 | -4.07079 |
| EFNA3     | 1.13162  | 2.156216 | 2.11947  | 0.035416 | 0.351803 | -4.07299 |
| NCAM1     | -1.03256 | 1.096501 | -2.11639 | 0.03568  | 0.353323 | -4.07913 |
| EHF       | 1.198039 | 3.826009 | 2.116033 | 0.035711 | 0.353441 | -4.07984 |
| FAM83D    | 1.115318 | 2.159229 | 2.111773 | 0.03608  | 0.356017 | -4.08833 |
| SYT8      | 1.950121 | 3.418448 | 2.110155 | 0.036221 | 0.356081 | -4.09154 |
| MPZL2     | 1.172565 | 4.014916 | 2.104865 | 0.036685 | 0.358858 | -4.10205 |
| F5        | 1.445703 | 2.703796 | 2.104387 | 0.036727 | 0.358997 | -4.103   |

|          |          |          |          |          |          |          |
|----------|----------|----------|----------|----------|----------|----------|
| KRT16    | 2.207135 | 3.836958 | 2.095291 | 0.037538 | 0.362782 | -4.12099 |
| CPA3     | 1.302266 | 3.198045 | 2.086235 | 0.038361 | 0.367091 | -4.13884 |
| FUT3     | 1.418958 | 4.02293  | 2.085556 | 0.038423 | 0.36745  | -4.14017 |
| C9orf152 | 1.335785 | 2.729067 | 2.078662 | 0.03906  | 0.369672 | -4.1537  |
| CYP3A5   | 1.448802 | 3.768728 | 2.07331  | 0.039561 | 0.371735 | -4.16418 |
| MYRF     | 1.048532 | 3.967406 | 2.068321 | 0.040033 | 0.373332 | -4.17392 |
| UBE2C    | 1.21948  | 3.699031 | 2.065275 | 0.040324 | 0.374298 | -4.17986 |
| NAPRT    | 1.107564 | 4.417809 | 2.052803 | 0.041532 | 0.380284 | -4.20408 |
| TMEM238  | 1.103042 | 2.715998 | 2.049666 | 0.041841 | 0.381581 | -4.21015 |
| VSIG1    | 2.035395 | 2.947758 | 2.049001 | 0.041907 | 0.381733 | -4.21143 |
| TMC5     | 1.386727 | 4.254849 | 2.046076 | 0.042197 | 0.382653 | -4.21708 |
| APOBEC1  | 1.483655 | 1.839146 | 2.036756 | 0.043133 | 0.385652 | -4.23504 |
| PADI1    | 2.016432 | 2.584981 | 2.036484 | 0.04316  | 0.385652 | -4.23556 |
| SLC2A1   | 1.501424 | 5.347178 | 2.032945 | 0.04352  | 0.385652 | -4.24236 |
| KLK7     | 2.195014 | 3.382465 | 2.031949 | 0.043622 | 0.385981 | -4.24427 |
| GZMK     | -1.14685 | 1.675011 | -2.02803 | 0.044025 | 0.388796 | -4.25177 |
| FCN1     | -1.09591 | 1.272393 | -2.02701 | 0.044131 | 0.38902  | -4.25374 |
| SLC5A1   | 1.309972 | 3.089471 | 2.025227 | 0.044315 | 0.389751 | -4.25714 |
| HSPA1B   | 1.164059 | 4.896876 | 2.024426 | 0.044398 | 0.390304 | -4.25867 |
| HLA-DRB5 | -1.41097 | 6.556056 | -2.0215  | 0.044703 | 0.390847 | -4.26426 |
| WNT7B    | 1.018572 | 2.240428 | 2.020996 | 0.044755 | 0.391127 | -4.26522 |
| TPSB2    | 1.228141 | 3.21238  | 2.01501  | 0.045385 | 0.39305  | -4.27662 |
| AHNAK2   | 1.257772 | 2.944915 | 2.014448 | 0.045445 | 0.39305  | -4.27769 |
| CPVL     | -1.03918 | 3.217338 | -2.00594 | 0.046354 | 0.396806 | -4.29384 |
| VSTM2L   | 1.724216 | 4.093742 | 2.002448 | 0.046731 | 0.397189 | -4.30045 |
| MMP1     | 2.28372  | 5.433185 | 1.997067 | 0.047318 | 0.399219 | -4.31061 |
| SFTA2    | 1.799108 | 4.316565 | 1.995428 | 0.047498 | 0.399907 | -4.3137  |
| GJC2     | 1.020088 | 1.763996 | 1.991075 | 0.047979 | 0.402329 | -4.3219  |
| GJB4     | 1.07428  | 1.900193 | 1.980639 | 0.049148 | 0.408466 | -4.34148 |
| CCR7     | -1.27951 | 1.726426 | -1.98057 | 0.049156 | 0.408466 | -4.3416  |
| FPR3     | -1.11367 | 2.786241 | -1.9792  | 0.049311 | 0.409404 | -4.34416 |
| MYO1A    | 1.334634 | 1.809085 | 1.97556  | 0.049726 | 0.411433 | -4.35097 |
