# Supplementary material for: Development of a Prognostic Model Based on Pyroptosis-Related Genes in Pancreatic Adenocarcinoma
Source: Hindawi journal article supplement (doi:10.1155/2022/9141117), 2022-05-29
Supplement: f2 [file 9141117.f2.pdf]

Table S2

| ONTOLOGY ID | Description                                                                                 | BgRatio   |
|-------------|---------------------------------------------------------------------------------------------|-----------|
| BP          | GO:003277 positive regulation of interleukin-1 beta production                              | 53/18866  |
| BP          | GO:003277 positive regulation of interleukin-1 production                                   | 60/18866  |
| BP          | GO:003266 regulation of interleukin-1 beta production                                       | 97/18866  |
| BP          | GO:003266 interleukin-1 beta production                                                     | 106/18866 |
| BP          | GO:003266 regulation of interleukin-1 production                                            | 111/18866 |
| BP          | GO:007026 pyroptosis                                                                        | 12/18866  |
| BP          | GO:003266 interleukin-1 production                                                          | 121/18866 |
| BP          | GO:200109 positive regulation of cysteine-type endopeptidase activity                       | 151/18866 |
| BP          | GO:001099 positive regulation of endopeptidase activity                                     | 181/18866 |
| BP          | GO:001099 positive regulation of peptidase activity                                         | 201/18866 |
| BP          | GO:000181 positive regulation of cytokine production                                        | 447/18866 |
| BP          | GO:200011 regulation of cysteine-type endopeptidase activity                                | 239/18866 |
| BP          | GO:004328 positive regulation of cysteine-type endopeptidase activity involved in apoptosis | 134/18866 |
| BP          | GO:005109 positive regulation of NF-kappaB transcription factor activity                    | 159/18866 |
| BP          | GO:000961 response to virus                                                                 | 349/18866 |
| BP          | GO:004586 positive regulation of proteolysis                                                | 370/18866 |
| BP          | GO:005254 regulation of endopeptidase activity                                              | 434/18866 |
| BP          | GO:004328 regulation of cysteine-type endopeptidase activity involved in apoptosis          | 215/18866 |
| BP          | GO:000691 activation of cysteine-type endopeptidase activity involved in apoptosis          | 86/18866  |
| BP          | GO:005254 regulation of peptidase activity                                                  | 466/18866 |
| BP          | GO:005109 positive regulation of DNA-binding transcription factor activity                  | 270/18866 |
| BP          | GO:007135 cellular response to tumor necrosis factor                                        | 297/18866 |
| BP          | GO:003461 response to tumor necrosis factor                                                 | 320/18866 |
| BP          | GO:000959 detection of biotic stimulus                                                      | 36/18866  |
| BP          | GO:004274 defense response to bacterium                                                     | 348/18866 |
| BP          | GO:003326 tumor necrosis factor-mediated signaling pathway                                  | 173/18866 |
| BP          | GO:007134 cellular response to interferon-gamma                                             | 182/18866 |
| BP          | GO:003434 response to interferon-gamma                                                      | 202/18866 |
| BP          | GO:005109 regulation of DNA-binding transcription factor activity                           | 455/18866 |
| BP          | GO:007026 necrotic cell death                                                               | 64/18866  |
| BP          | GO:007121 cellular response to biotic stimulus                                              | 246/18866 |
| BP          | GO:005166 defense response to virus                                                         | 258/18866 |
| BP          | GO:006033 interferon-gamma-mediated signaling pathway                                       | 91/18866  |
| BP          | GO:005088 defense response to Gram-positive bacterium                                       | 99/18866  |
| BP          | GO:190379 negative regulation of production of miRNAs involved in gene silencing            | 14/18866  |
| BP          | GO:001604 detection of bacterium                                                            | 17/18866  |
| BP          | GO:004454 NLRP3 inflammasome complex assembly                                               | 17/18866  |
| BP          | GO:005134 regulation of oxidoreductase activity                                             | 117/18866 |
| BP          | GO:190121 regulation of NIK/NF-kappaB signaling                                             | 119/18866 |
| BP          | GO:009854 detection of other organism                                                       | 19/18866  |
| BP          | GO:006096 negative regulation of gene silencing by miRNA                                    | 20/18866  |
| BP          | GO:005106 positive regulation of nitric-oxide synthase activity                             | 22/18866  |
| BP          | GO:003134 positive regulation of defense response                                           | 385/18866 |
| BP          | GO:003549 cellular response to interferon-beta                                              | 23/18866  |
| BP          | GO:006014 negative regulation of posttranscriptional gene silencing                         | 23/18866  |
| BP          | GO:006096 negative regulation of gene silencing by RNA                                      | 23/18866  |
| BP          | GO:190379 regulation of production of miRNAs involved in gene silencing by miRNA            | 23/18866  |
| BP          | GO:009858 detection of external biotic stimulus                                             | 24/18866  |
| BP          | GO:007092 regulation of production of small RNA involved in gene silencing by RNA           | 25/18866  |
| BP          | GO:000281 regulation of response to biotic stimulus                                         | 409/18866 |

|    |                                                                               |           |
|----|-------------------------------------------------------------------------------|-----------|
| BP | GO:000961 response to salt stress                                             | 27/18866  |
| BP | GO:000281 regulation of adaptive immune response                              | 168/18866 |
| BP | GO:003277 positive regulation of monooxygenase activity                       | 31/18866  |
| BP | GO:003541 response to interferon-beta                                         | 32/18866  |
| BP | GO:200121 positive regulation of apoptotic signaling pathway                  | 183/18866 |
| BP | GO:003801 NIK/NF-kappaB signaling                                             | 184/18866 |
| BP | GO:004311 positive regulation of I-kappaB kinase/NF-kappaB signaling          | 188/18866 |
| BP | GO:006091 negative regulation of gene silencing                               | 37/18866  |
| BP | GO:190281 positive regulation of pri-miRNA transcription by RNA polymerase II | 40/18866  |
| BP | GO:007121 cellular response to lipopolysaccharide                             | 208/18866 |
| BP | GO:007121 cellular response to molecule of bacterial origin                   | 222/18866 |
| BP | GO:007021 necroptotic process                                                 | 45/18866  |
| BP | GO:000261 regulation of acute inflammatory response                           | 49/18866  |
| BP | GO:003511 production of miRNAs involved in gene silencing by miRNA            | 49/18866  |
| BP | GO:009731 programmed necrotic cell death                                      | 50/18866  |
| BP | GO:190281 regulation of pri-miRNA transcription by RNA polymerase II          | 51/18866  |
| BP | GO:005091 regulation of nitric-oxide synthase activity                        | 52/18866  |
| BP | GO:006161 pri-miRNA transcription by RNA polymerase II                        | 53/18866  |
| BP | GO:000281 positive regulation of response to biotic stimulus                  | 251/18866 |
| BP | GO:004311 regulation of I-kappaB kinase/NF-kappaB signaling                   | 252/18866 |
| BP | GO:003101 dsRNA processing                                                    | 54/18866  |
| BP | GO:007091 production of small RNA involved in gene silencing by RNA           | 54/18866  |
| BP | GO:003021 T cell differentiation                                              | 253/18866 |
| BP | GO:005131 positive regulation of oxidoreductase activity                      | 55/18866  |
| BP | GO:004351 positive regulation of neuron apoptotic process                     | 59/18866  |
| BP | GO:006191 selective autophagy                                                 | 61/18866  |
| BP | GO:001081 regulation of tumor necrosis factor-mediated signaling pathway      | 62/18866  |
| BP | GO:200031 regulation of endothelial cell apoptotic process                    | 62/18866  |
| BP | GO:200121 positive regulation of intrinsic apoptotic signaling pathway        | 62/18866  |
| BP | GO:000721 I-kappaB kinase/NF-kappaB signaling                                 | 286/18866 |
| BP | GO:009711 intrinsic apoptotic signaling pathway                               | 290/18866 |
| BP | GO:190211 regulation of leukocyte differentiation                             | 290/18866 |
| BP | GO:003271 regulation of monooxygenase activity                                | 66/18866  |
| BP | GO:007251 endothelial cell apoptotic process                                  | 68/18866  |
| BP | GO:003561 cellular response to drug                                           | 71/18866  |
| BP | GO:004501 regulation of innate immune response                                | 307/18866 |
| BP | GO:005061 cytokine secretion                                                  | 72/18866  |
| BP | GO:007141 cellular response to external stimulus                              | 326/18866 |
| BP | GO:007121 cellular response to mechanical stimulus                            | 79/18866  |
| BP | GO:190301 regulation of leukocyte cell-cell adhesion                          | 329/18866 |
| BP | GO:007121 cellular response to abiotic stimulus                               | 331/18866 |
| BP | GO:010401 cellular response to environmental stimulus                         | 331/18866 |
| BP | GO:190121 positive regulation of NIK/NF-kappaB signaling                      | 80/18866  |
| BP | GO:003241 response to lipopolysaccharide                                      | 334/18866 |
| BP | GO:000271 regulation of cytokine production involved in immune response       | 83/18866  |
| BP | GO:000691 response to osmotic stress                                          | 85/18866  |
| BP | GO:003271 positive regulation of interleukin-6 production                     | 88/18866  |
| BP | GO:000221 response to molecule of bacterial origin                            | 356/18866 |
| BP | GO:000711 leukocyte cell-cell adhesion                                        | 364/18866 |
| BP | GO:003201 negative regulation of NF-kappaB transcription factor activity      | 93/18866  |
| BP | GO:003001 lymphocyte differentiation                                          | 368/18866 |

|    |                                                                                          |           |
|----|------------------------------------------------------------------------------------------|-----------|
| BP | GO:19040: regulation of epithelial cell apoptotic process                                | 94/18866  |
| BP | GO:00603: type I interferon signaling pathway                                            | 95/18866  |
| BP | GO:00713: cellular response to type I interferon                                         | 95/18866  |
| BP | GO:00971: execution phase of apoptosis                                                   | 95/18866  |
| BP | GO:00466: regulation of alpha-beta T cell activation                                     | 97/18866  |
| BP | GO:19012: positive regulation of neuron death                                            | 97/18866  |
| BP | GO:00343: response to type I interferon                                                  | 99/18866  |
| BP | GO:00326: interleukin-8 production                                                       | 101/18866 |
| BP | GO:00086: intrinsic apoptotic signaling pathway in response to DNA damage                | 103/18866 |
| BP | GO:00023: cytokine production involved in immune response                                | 104/18866 |
| BP | GO:00028: positive regulation of adaptive immune response based on somatic recombination | 105/18866 |
| BP | GO:00027: positive regulation of lymphocyte mediated immunity                            | 106/18866 |
| BP | GO:00466: alpha-beta T cell differentiation                                              | 106/18866 |
| BP | GO:20003: positive regulation of reactive oxygen species metabolic process               | 106/18866 |
| BP | GO:00022: T cell activation involved in immune response                                  | 109/18866 |
| BP | GO:00028: positive regulation of adaptive immune response                                | 110/18866 |
| BP | GO:20012: regulation of apoptotic signaling pathway                                      | 413/18866 |
| BP | GO:00025: acute inflammatory response                                                    | 111/18866 |
| BP | GO:00507: regulation of inflammatory response                                            | 425/18866 |
| BP | GO:00609: regulation of gene silencing by miRNA                                          | 116/18866 |
| BP | GO:19040: epithelial cell apoptotic process                                              | 117/18866 |
| BP | GO:00601: regulation of posttranscriptional gene silencing                               | 120/18866 |
| BP | GO:00609: regulation of gene silencing by RNA                                            | 120/18866 |
| BP | GO:00224: regulation of cell-cell adhesion                                               | 439/18866 |
| BP | GO:00510: negative regulation of DNA metabolic process                                   | 127/18866 |
| BP | GO:19054: positive regulation of protein localization to membrane                        | 127/18866 |
| BP | GO:00026: regulation of immune effector process                                          | 470/18866 |
| BP | GO:00513: negative regulation of hydrolase activity                                      | 473/18866 |
| BP | GO:00027: positive regulation of leukocyte mediated immunity                             | 138/18866 |
| BP | GO:00463: positive regulation of JNK cascade                                             | 138/18866 |
| BP | GO:00421: T cell activation                                                              | 483/18866 |
| BP | GO:00609: regulation of gene silencing                                                   | 140/18866 |
| BP | GO:00022: activation of innate immune response                                           | 144/18866 |
| BP | GO:00027: regulation of production of molecular mediator of immune response              | 144/18866 |
| BP | GO:19037: regulation of hemopoiesis                                                      | 498/18866 |
| BP | GO:00466: alpha-beta T cell activation                                                   | 146/18866 |
| BP | GO:00455: regulation of T cell differentiation                                           | 150/18866 |
| BP | GO:00028: regulation of adaptive immune response based on somatic recombination          | 153/18866 |
| BP | GO:00027: regulation of lymphocyte mediated immunity                                     | 154/18866 |
| BP | GO:00001: activation of MAPK activity                                                    | 156/18866 |
| BP | GO:00326: regulation of interleukin-6 production                                         | 159/18866 |
| BP | GO:19021: positive regulation of leukocyte differentiation                               | 159/18866 |
| BP | GO:00435: regulation of blood vessel endothelial cell migration                          | 164/18866 |
| BP | GO:20012: regulation of intrinsic apoptotic signaling pathway                            | 166/18866 |
| BP | GO:00326: interleukin-6 production                                                       | 170/18866 |
| BP | GO:00328: positive regulation of stress-activated MAPK cascade                           | 170/18866 |
| BP | GO:00703: positive regulation of stress-activated protein kinase signaling cascade       | 172/18866 |
| CC | GO:00617: inflammasome complex                                                           | 17/19559  |
| MF | GO:00165: peptidase activator activity                                                   | 40/18352  |
| MF | GO:00507: CARD domain binding                                                            | 16/18352  |
| MF | GO:00086: cysteine-type endopeptidase activator activity involved in apoptotic process   | 17/18352  |

|    |                                                                                         |           |
|----|-----------------------------------------------------------------------------------------|-----------|
| MF | GO:004283: peptidoglycan binding                                                        | 18/18352  |
| MF | GO:001650: peptidase activator activity involved in apoptotic process                   | 20/18352  |
| MF | GO:000202: protease binding                                                             | 137/18352 |
| MF | GO:004302: cysteine-type endopeptidase regulator activity involved in apoptotic process | 43/18352  |
| MF | GO:006113: peptidase regulator activity                                                 | 229/18352 |
| MF | GO:003097: receptor tyrosine kinase binding                                             | 72/18352  |
| MF | GO:000554: phosphatidylinositol-4,5-bisphosphate binding                                | 82/18352  |
| MF | GO:199078: protein tyrosine kinase binding                                              | 98/18352  |
| MF | GO:190293: phosphatidylinositol bisphosphate binding                                    | 119/18352 |
| MF | GO:190198: phosphatidylinositol phosphate binding                                       | 179/18352 |
| MF | GO:000103: TFIIID-class transcription factor complex binding                            | 10/18352  |
| MF | GO:009719: cysteine-type endopeptidase activity involved in apoptotic signaling pathway | 10/18352  |
| MF | GO:190162: cardiolipin binding                                                          | 11/18352  |
| MF | GO:000516: neurotrophin receptor binding                                                | 12/18352  |
| MF | GO:008972: caspase binding                                                              | 12/18352  |
| MF | GO:009719: cysteine-type endopeptidase activity involved in apoptotic process           | 15/18352  |
| MF | GO:190161: phosphatidylglycerol binding                                                 | 15/18352  |
| MF | GO:000553: glycosaminoglycan binding                                                    | 232/18352 |
| MF | GO:000109: RNA polymerase II general transcription initiation factor binding            | 19/18352  |
| MF | GO:003509: phosphatidylinositol binding                                                 | 262/18352 |
| MF | GO:000512: cytokine receptor binding                                                    | 271/18352 |
| MF | GO:003818: pattern recognition receptor activity                                        | 23/18352  |
| MF | GO:000443: phosphatidylinositol phospholipase C activity                                | 26/18352  |
| MF | GO:000462: phospholipase C activity                                                     | 28/18352  |
| MF | GO:003503: histone acetyltransferase binding                                            | 28/18352  |

| pvalue   | p.adjust | qvalue   | geneID                | Count |
|----------|----------|----------|-----------------------|-------|
| 6.20E-13 | 7.52E-10 | 3.41E-10 | NLRC4/AIM             | 6     |
| 1.35E-12 | 8.18E-10 | 3.71E-10 | NLRC4/AIM             | 6     |
| 2.63E-11 | 1.06E-08 | 4.83E-09 | NLRC4/AIM             | 6     |
| 4.53E-11 | 1.35E-08 | 6.14E-09 | NLRC4/AIM             | 6     |
| 6.00E-11 | 1.35E-08 | 6.14E-09 | NLRC4/AIM             | 6     |
| 6.69E-11 | 1.35E-08 | 6.14E-09 | NLRC4/AIM             | 4     |
| 1.02E-10 | 1.76E-08 | 7.99E-09 | NLRC4/AIM             | 6     |
| 3.90E-10 | 5.91E-08 | 2.68E-08 | NLRC4/AIM             | 6     |
| 1.16E-09 | 1.57E-07 | 7.12E-08 | NLRC4/AIM             | 6     |
| 2.19E-09 | 2.65E-07 | 1.20E-07 | NLRC4/AIM             | 6     |
| 6.07E-09 | 6.25E-07 | 2.84E-07 | NLRC4/AIM             | 7     |
| 6.19E-09 | 6.25E-07 | 2.84E-07 | NLRC4/AIM             | 6     |
| 2.06E-08 | 1.92E-06 | 8.73E-07 | NLRC4/TNI             | 5     |
| 4.87E-08 | 4.21E-06 | 1.91E-06 | NLRC4/AIM             | 5     |
| 5.91E-08 | 4.77E-06 | 2.17E-06 | AIM2/TNF <sub>α</sub> | 6     |
| 8.35E-08 | 6.32E-06 | 2.87E-06 | NLRC4/AIM             | 6     |
| 2.14E-07 | 1.48E-05 | 6.71E-06 | NLRC4/AIM             | 6     |
| 2.19E-07 | 1.48E-05 | 6.71E-06 | NLRC4/TNI             | 5     |
| 2.79E-07 | 1.78E-05 | 8.08E-06 | NLRC4/TNI             | 4     |
| 3.26E-07 | 1.97E-05 | 8.97E-06 | NLRC4/AIM             | 6     |
| 6.78E-07 | 3.91E-05 | 1.78E-05 | NLRC4/AIM             | 5     |
| 1.09E-06 | 5.98E-05 | 2.72E-05 | AIM2/TNF <sub>α</sub> | 5     |
| 1.57E-06 | 8.25E-05 | 3.75E-05 | AIM2/TNF <sub>α</sub> | 5     |
| 1.80E-06 | 9.10E-05 | 4.13E-05 | NLRC4/NO              | 3     |
| 2.36E-06 | 0.000115 | 5.21E-05 | NLRC4/TNI             | 5     |
| 4.58E-06 | 0.000213 | 9.69E-05 | AIM2/TNF <sub>α</sub> | 4     |
| 5.60E-06 | 0.000251 | 0.000114 | CASP1/IRF1            | 4     |
| 8.46E-06 | 0.000366 | 0.000166 | CASP1/IRF1            | 4     |
| 8.75E-06 | 0.000366 | 0.000166 | NLRC4/AIM             | 5     |
| 1.04E-05 | 0.00042  | 0.000191 | TNF/GSDM              | 3     |
| 1.84E-05 | 0.000719 | 0.000327 | TNF/CASP1             | 4     |
| 2.22E-05 | 0.00084  | 0.000381 | AIM2/NLRI             | 4     |
| 3.00E-05 | 0.001101 | 0.0005   | IRF1/IRF2/            | 3     |
| 3.86E-05 | 0.001375 | 0.000624 | TNF/NOD1              | 3     |
| 3.97E-05 | 0.001375 | 0.000624 | TNF/TP53              | 2     |
| 5.93E-05 | 0.001941 | 0.000882 | NLRC4/NO              | 2     |
| 5.93E-05 | 0.001941 | 0.000882 | AIM2/NLRI             | 2     |
| 6.35E-05 | 0.002027 | 0.000921 | TNF/NOD1              | 3     |
| 6.68E-05 | 0.002077 | 0.000943 | TNF/NOD1              | 3     |
| 7.45E-05 | 0.002256 | 0.001025 | NLRC4/NO              | 2     |
| 8.27E-05 | 0.002445 | 0.00111  | TNF/TP53              | 2     |
| 0.0001   | 0.002836 | 0.001288 | TNF/NOD1              | 2     |
| 0.000106 | 0.002836 | 0.001288 | NLRC4/AIM             | 4     |
| 0.00011  | 0.002836 | 0.001288 | AIM2/IRF1             | 2     |
| 0.00011  | 0.002836 | 0.001288 | TNF/TP53              | 2     |
| 0.00011  | 0.002836 | 0.001288 | TNF/TP53              | 2     |
| 0.00011  | 0.002836 | 0.001288 | TNF/TP53              | 2     |
| 0.00012  | 0.003029 | 0.001376 | NLRC4/NO              | 2     |
| 0.00013  | 0.003224 | 0.001464 | TNF/TP53              | 2     |
| 0.000133 | 0.00323  | 0.001467 | NLRC4/AIM             | 4     |

|          |          |          |            |   |
|----------|----------|----------|------------|---|
| 0.000152 | 0.003621 | 0.001645 | TNF/TP53   | 2 |
| 0.000186 | 0.00433  | 0.001967 | TNF/NLRP3  | 3 |
| 0.000202 | 0.004609 | 0.002093 | TNF/NOD1   | 2 |
| 0.000215 | 0.004823 | 0.002191 | AIM2/IRF1  | 2 |
| 0.000239 | 0.005257 | 0.002388 | TNF/GSDM   | 3 |
| 0.000243 | 0.005257 | 0.002388 | TNF/NOD1   | 3 |
| 0.000259 | 0.005502 | 0.002499 | TNF/CASP1  | 3 |
| 0.000288 | 0.006018 | 0.002733 | TNF/TP53   | 2 |
| 0.000337 | 0.00692  | 0.003143 | TNF/TP53   | 2 |
| 0.000348 | 0.007034 | 0.003195 | TNF/CASP1  | 3 |
| 0.000421 | 0.008342 | 0.003789 | TNF/CASP1  | 3 |
| 0.000427 | 0.008342 | 0.003789 | TNF/TP53   | 2 |
| 0.000506 | 0.009585 | 0.004354 | TNF/NLRP3  | 2 |
| 0.000506 | 0.009585 | 0.004354 | TNF/TP53   | 2 |
| 0.000527 | 0.009827 | 0.004464 | TNF/TP53   | 2 |
| 0.000548 | 0.010069 | 0.004574 | TNF/TP53   | 2 |
| 0.00057  | 0.010245 | 0.004654 | TNF/NOD1   | 2 |
| 0.000592 | 0.010245 | 0.004654 | TNF/TP53   | 2 |
| 0.000603 | 0.010245 | 0.004654 | NLRC4/AIM2 | 3 |
| 0.00061  | 0.010245 | 0.004654 | TNF/CASP1  | 3 |
| 0.000615 | 0.010245 | 0.004654 | TNF/TP53   | 2 |
| 0.000615 | 0.010245 | 0.004654 | TNF/TP53   | 2 |
| 0.000617 | 0.010245 | 0.004654 | NLRP3/IRF1 | 3 |
| 0.000638 | 0.010443 | 0.004744 | TNF/NOD1   | 2 |
| 0.000734 | 0.011854 | 0.005384 | TNF/TP53   | 2 |
| 0.000784 | 0.012423 | 0.005643 | NOD1/TP53  | 2 |
| 0.00081  | 0.012423 | 0.005643 | TNF/CASP1  | 2 |
| 0.00081  | 0.012423 | 0.005643 | TNF/PLCG1  | 2 |
| 0.00081  | 0.012423 | 0.005643 | GSDME/TP53 | 2 |
| 0.000881 | 0.013346 | 0.006062 | TNF/CASP1  | 3 |
| 0.000917 | 0.013392 | 0.006083 | TNF/GSDM   | 3 |
| 0.000917 | 0.013392 | 0.006083 | TNF/NLRP3  | 3 |
| 0.000917 | 0.013392 | 0.006083 | TNF/NOD1   | 2 |
| 0.000973 | 0.014042 | 0.006378 | TNF/PLCG1  | 2 |
| 0.00106  | 0.01512  | 0.006868 | AIM2/TP53  | 2 |
| 0.001081 | 0.015189 | 0.006899 | NLRC4/AIM2 | 3 |
| 0.00109  | 0.015189 | 0.006899 | TNF/NLRP3  | 2 |
| 0.001286 | 0.017512 | 0.007954 | CASP1/IRF1 | 3 |
| 0.001311 | 0.017512 | 0.007954 | CASP1/IRF1 | 2 |
| 0.00132  | 0.017512 | 0.007954 | TNF/NLRP3  | 3 |
| 0.001343 | 0.017512 | 0.007954 | CASP1/IRF1 | 3 |
| 0.001343 | 0.017512 | 0.007954 | CASP1/IRF1 | 3 |
| 0.001344 | 0.017512 | 0.007954 | TNF/NOD1   | 2 |
| 0.001379 | 0.017774 | 0.008073 | TNF/CASP1  | 3 |
| 0.001445 | 0.01844  | 0.008376 | TNF/NLRP3  | 2 |
| 0.001515 | 0.019128 | 0.008689 | TNF/TP53   | 2 |
| 0.001623 | 0.020276 | 0.00921  | TNF/NOD1   | 2 |
| 0.001656 | 0.020475 | 0.0093   | TNF/CASP1  | 3 |
| 0.001764 | 0.0216   | 0.009811 | TNF/NLRP3  | 3 |
| 0.00181  | 0.021788 | 0.009897 | AIM2/NLRP3 | 2 |
| 0.00182  | 0.021788 | 0.009897 | NLRP3/IRF1 | 3 |

|          |          |          |           |   |
|----------|----------|----------|-----------|---|
| 0.001849 | 0.021788 | 0.009897 | TNF/PLCG1 | 2 |
| 0.001888 | 0.021788 | 0.009897 | IRF1/IRF2 | 2 |
| 0.001888 | 0.021788 | 0.009897 | IRF1/IRF2 | 2 |
| 0.001888 | 0.021788 | 0.009897 | CASP1/TP5 | 2 |
| 0.001967 | 0.022278 | 0.01012  | NLRP3/IRF | 2 |
| 0.001967 | 0.022278 | 0.01012  | TNF/TP53  | 2 |
| 0.002048 | 0.022979 | 0.010438 | IRF1/IRF2 | 2 |
| 0.00213  | 0.023683 | 0.010758 | TNF/NOD1  | 2 |
| 0.002214 | 0.024393 | 0.01108  | TNF/TP53  | 2 |
| 0.002256 | 0.024637 | 0.011191 | TNF/NLRP3 | 2 |
| 0.002299 | 0.024689 | 0.011214 | TNF/NLRP3 | 2 |
| 0.002343 | 0.024689 | 0.011214 | TNF/NLRP3 | 2 |
| 0.002343 | 0.024689 | 0.011214 | NLRP3/IRF | 2 |
| 0.002343 | 0.024689 | 0.011214 | TNF/TP53  | 2 |
| 0.002475 | 0.025858 | 0.011745 | NLRP3/TP5 | 2 |
| 0.00252  | 0.025982 | 0.011802 | TNF/NLRP3 | 2 |
| 0.00253  | 0.025982 | 0.011802 | TNF/GSDM  | 3 |
| 0.002565 | 0.026124 | 0.011866 | TNF/NLRP3 | 2 |
| 0.002744 | 0.027714 | 0.012588 | TNF/CASP1 | 3 |
| 0.002797 | 0.028015 | 0.012725 | TNF/TP53  | 2 |
| 0.002844 | 0.028258 | 0.012835 | TNF/PLCG1 | 2 |
| 0.002989 | 0.029165 | 0.013247 | TNF/TP53  | 2 |
| 0.002989 | 0.029165 | 0.013247 | TNF/TP53  | 2 |
| 0.003008 | 0.029165 | 0.013247 | TNF/NLRP3 | 3 |
| 0.003341 | 0.031881 | 0.014481 | GZMA/TP5  | 2 |
| 0.003341 | 0.031881 | 0.014481 | TNF/TP53  | 2 |
| 0.003647 | 0.034535 | 0.015687 | AIM2/TNF, | 3 |
| 0.003713 | 0.034887 | 0.015847 | TNF/GZMA  | 3 |
| 0.00393  | 0.036163 | 0.016426 | TNF/NLRP3 | 2 |
| 0.00393  | 0.036163 | 0.016426 | TNF/NOD1  | 2 |
| 0.003939 | 0.036163 | 0.016426 | NLRP3/IRF | 3 |
| 0.004042 | 0.036835 | 0.016732 | TNF/TP53  | 2 |
| 0.004271 | 0.038248 | 0.017374 | NLRC4/AIM | 2 |
| 0.004271 | 0.038248 | 0.017374 | TNF/NLRP3 | 2 |
| 0.004292 | 0.038248 | 0.017374 | TNF/NLRP3 | 3 |
| 0.004387 | 0.038812 | 0.017629 | NLRP3/IRF | 2 |
| 0.004624 | 0.040615 | 0.018448 | NLRP3/IRF | 2 |
| 0.004806 | 0.041908 | 0.019036 | TNF/NLRP3 | 2 |
| 0.004868 | 0.04214  | 0.019141 | TNF/NLRP3 | 2 |
| 0.004991 | 0.042905 | 0.019489 | TNF/NOD1  | 2 |
| 0.00518  | 0.043902 | 0.019942 | TNF/NOD1  | 2 |
| 0.00518  | 0.043902 | 0.019942 | TNF/NLRP3 | 2 |
| 0.005501 | 0.046301 | 0.021031 | TNF/PLCG1 | 2 |
| 0.005632 | 0.047077 | 0.021384 | GSDME/TP  | 2 |
| 0.005899 | 0.048633 | 0.022091 | TNF/NOD1  | 2 |
| 0.005899 | 0.048633 | 0.022091 | TNF/NOD1  | 2 |
| 0.006034 | 0.049413 | 0.022445 | TNF/NOD1  | 2 |
| 2.78E-10 | 1.11E-08 | 9.36E-09 | NLRC4/AIM | 4 |
| 2.70E-06 | 0.000189 | 6.83E-05 | NLRC4/CA  | 3 |
| 5.53E-05 | 0.001223 | 0.000441 | CASP1/NO  | 2 |
| 6.26E-05 | 0.001223 | 0.000441 | CASP1/NO  | 2 |

|          |          |          |           |   |
|----------|----------|----------|-----------|---|
| 7.04E-05 | 0.001223 | 0.000441 | NOD1/NLR  | 2 |
| 8.74E-05 | 0.001223 | 0.000441 | CASP1/NO  | 2 |
| 0.00011  | 0.001286 | 0.000464 | NLRC4/TNI | 3 |
| 0.000411 | 0.004115 | 0.001485 | CASP1/NO  | 2 |
| 0.0005   | 0.004375 | 0.001579 | NLRC4/CA  | 3 |
| 0.001151 | 0.008955 | 0.003232 | PLCG1/TPE | 2 |
| 0.00149  | 0.01043  | 0.003764 | GSDMC/G   | 2 |
| 0.002119 | 0.013483 | 0.004866 | PLCG1/TPE | 2 |
| 0.003104 | 0.018105 | 0.006534 | GSDMC/G   | 2 |
| 0.006876 | 0.032939 | 0.011888 | GSDMC/G   | 2 |
| 0.007063 | 0.032939 | 0.011888 | TP53      | 1 |
| 0.007063 | 0.032939 | 0.011888 | CASP1     | 1 |
| 0.007767 | 0.032939 | 0.011888 | GSDME     | 1 |
| 0.00847  | 0.032939 | 0.011888 | PLCG1     | 1 |
| 0.00847  | 0.032939 | 0.011888 | NLRC4     | 1 |
| 0.010577 | 0.03702  | 0.01336  | CASP1     | 1 |
| 0.010577 | 0.03702  | 0.01336  | GSDME     | 1 |
| 0.011323 | 0.037744 | 0.013622 | NOD1/NLR  | 2 |
| 0.01338  | 0.042573 | 0.015365 | TP53      | 1 |
| 0.014276 | 0.04345  | 0.015681 | GSDMC/G   | 2 |
| 0.015221 | 0.044395 | 0.016022 | TNF/PLCG1 | 2 |
| 0.016176 | 0.045292 | 0.016346 | NOD1      | 1 |
| 0.018268 | 0.04915  | 0.017738 | PLCG1     | 1 |
| 0.01966  | 0.04915  | 0.017738 | PLCG1     | 1 |
| 0.01966  | 0.04915  | 0.017738 | TP53      | 1 |



| ID       | Description                                      | BgRatio  | pvalue   | p.adjust | qvalue   |
|----------|--------------------------------------------------|----------|----------|----------|----------|
| hsa05131 | Shigellosis                                      | 247/8111 | 2.48E-09 | 3.15E-07 | 2.06E-07 |
| hsa05133 | Pertussis                                        | 76/8111  | 1.54E-08 | 9.75E-07 | 6.39E-07 |
| hsa04621 | NOD-like receptor signaling pathway              | 185/8111 | 2.53E-08 | 1.07E-06 | 7.01E-07 |
| hsa05135 | Yersinia infection                               | 137/8111 | 3.01E-07 | 9.55E-06 | 6.26E-06 |
| hsa05417 | Lipid and atherosclerosis                        | 215/8111 | 2.83E-06 | 7.18E-05 | 4.70E-05 |
| hsa04625 | C-type lectin receptor signaling pathway         | 104/8111 | 5.05E-06 | 0.000106 | 6.91E-05 |
| hsa05132 | Salmonella infection                             | 249/8111 | 5.82E-06 | 0.000106 | 6.91E-05 |
| hsa05134 | Legionellosis                                    | 57/8111  | 3.81E-05 | 0.000605 | 0.000396 |
| hsa05171 | Coronavirus disease - COVID-19                   | 232/8111 | 0.00012  | 0.001688 | 0.001105 |
| hsa04217 | Necroptosis                                      | 159/8111 | 0.000802 | 0.010181 | 0.006667 |
| hsa05164 | Influenza A                                      | 172/8111 | 0.001008 | 0.011634 | 0.007618 |
| hsa05130 | Pathogenic Escherichia coli infection            | 197/8111 | 0.001493 | 0.015799 | 0.010345 |
| hsa05205 | Proteoglycans in cancer                          | 205/8111 | 0.001674 | 0.016358 | 0.010711 |
| hsa04623 | Cytosolic DNA-sensing pathway                    | 63/8111  | 0.002567 | 0.023286 | 0.015247 |
| hsa04664 | Fc epsilon RI signaling pathway                  | 68/8111  | 0.002984 | 0.024949 | 0.016336 |
| hsa05120 | Epithelial cell signaling in Helicobacter pylori | 70/8111  | 0.00316  | 0.024949 | 0.016336 |
| hsa05223 | Non-small cell lung cancer                       | 72/8111  | 0.00334  | 0.024949 | 0.016336 |
| hsa05214 | Glioma                                           | 75/8111  | 0.003619 | 0.025531 | 0.016718 |
| hsa04933 | AGE-RAGE signaling pathway in diabetic com       | 100/8111 | 0.006349 | 0.039556 | 0.025901 |
| hsa05165 | Human papillomavirus infection                   | 331/8111 | 0.006525 | 0.039556 | 0.025901 |
| hsa04064 | NF-kappa B signaling pathway                     | 104/8111 | 0.006852 | 0.039556 | 0.025901 |
| hsa04660 | T cell receptor signaling pathway                | 104/8111 | 0.006852 | 0.039556 | 0.025901 |
| hsa04668 | TNF signaling pathway                            | 112/8111 | 0.007911 | 0.043202 | 0.028288 |
| hsa05014 | Amyotrophic lateral sclerosis                    | 365/8111 | 0.008562 | 0.043202 | 0.028288 |
| hsa04071 | Sphingolipid signaling pathway                   | 119/8111 | 0.008894 | 0.043202 | 0.028288 |
| hsa04722 | Neurotrophin signaling pathway                   | 119/8111 | 0.008894 | 0.043202 | 0.028288 |
| hsa04919 | Thyroid hormone signaling pathway                | 121/8111 | 0.009185 | 0.043202 | 0.028288 |
| hsa04650 | Natural killer cell mediated cytotoxicity        | 131/8111 | 0.010702 | 0.04854  | 0.031783 |

| geneID    | Count |
|-----------|-------|
| 58484/712 | 7     |
| 7124/834/ | 5     |
| 58484/944 | 6     |
| 58484/712 | 5     |
| 7124/834/ | 5     |
| 7124/834/ | 4     |
| 58484/712 | 5     |
| 58484/712 | 3     |
| 7124/834/ | 4     |
| 7124/834/ | 3     |
| 7124/834/ | 3     |
| 7124/834/ | 3     |
| 7124/5335 | 3     |
| 9447/834  | 2     |
| 7124/5335 | 2     |
| 10392/533 | 2     |
| 5335/7157 | 2     |
| 5335/7157 | 2     |
| 7124/5335 | 2     |
| 7124/3659 | 3     |
| 7124/5335 | 2     |
| 7124/5335 | 2     |
| 7124/3659 | 2     |
| 7124/834/ | 3     |
| 7124/7157 | 2     |
| 5335/7157 | 2     |
| 5335/7157 | 2     |
| 7124/5335 | 2     |
