# Supplementary material for: Development of a Prognostic Model Based on Pyroptosis-Related Genes in Pancreatic Adenocarcinoma
Source: Hindawi journal article supplement (doi:10.1155/2022/9141117), 2022-05-29
Supplement: f3 [file 9141117.f3.pdf]

| id       | TCGA-2J-A | TCGA-2J-A | TCGA-2J-A | TCGA-2J-A | TCGA-2J-A | TCGA-2J-A | TCGA-2J-A | TCGA-2J-A |
|----------|-----------|-----------|-----------|-----------|-----------|-----------|-----------|-----------|
| KEGG_N_C | -0.41825  | 0.066991  | -0.05807  | 0.044076  | -0.21309  | -0.3658   | 0.04171   | 0.166934  |
| KEGG_OTF | -0.50097  | 0.512682  | 0.458201  | 0.288151  | -0.17694  | -0.4569   | 0.414413  | -0.48744  |
| KEGG_O_C | 0.228532  | 0.387884  | -0.15809  | 0.142684  | -0.25665  | -0.24674  | -0.00374  | 0.111466  |
| KEGG_GLY | 0.024687  | 0.280094  | 0.118737  | 0.351831  | -0.01911  | -0.25275  | 0.412447  | 0.112179  |
| KEGG_GLY | -0.02715  | 0.213182  | -0.41159  | 0.467832  | -0.233    | -0.03896  | -0.01181  | -0.12398  |
| KEGG_GLY | 0.074131  | -0.04523  | 0.141832  | 0.267566  | -0.23885  | 0.043897  | 0.087282  | -0.08279  |
| KEGG_GLY | 0.190907  | 0.185122  | -0.52041  | 0.224557  | 0.003006  | 0.12297   | -0.17346  | 0.398017  |
| KEGG_GLY | 0.10159   | 0.084679  | 0.055615  | 0.243305  | 0.059791  | 0.173034  | -0.0146   | 0.069393  |
| KEGG_ETH | 0.148081  | 0.330013  | -0.02406  | 0.123966  | -0.03483  | 0.301525  | 0.138972  | 0.170214  |
| KEGG_ARA | 0.287546  | 0.217429  | 0.150702  | -0.11617  | 0.004927  | 0.190375  | 0.281168  | -0.14315  |
| KEGG_LIN | 0.130591  | 0.366047  | 0.081216  | 0.065041  | -0.05373  | 0.333293  | -0.04442  | -0.01373  |
| KEGG_ALP | -0.18018  | 0.410083  | -0.0393   | 0.242592  | 0.087919  | 0.134458  | -0.07189  | 0.140841  |
| KEGG_SPH | 0.208532  | 0.316892  | 0.335973  | 0.205313  | -0.45059  | -0.2003   | 0.014225  | -0.20892  |
| KEGG_GLY | 0.29341   | 0.347163  | -0.05663  | 0.1004    | -0.09971  | 0.278517  | -0.03401  | -0.14667  |
| KEGG_GLY | 0.223796  | 0.38775   | -0.21037  | -0.00309  | -0.45606  | -0.44694  | 0.437836  | 0.130238  |
| KEGG_GLY | -0.38254  | -0.16024  | -0.47359  | 0.040036  | -0.07122  | -0.4699   | -0.03783  | -0.36627  |
| KEGG_RIB | -0.45972  | -0.43783  | 0.14364   | 0.275215  | -0.18851  | 0.063923  | -0.17844  | -0.04853  |
| KEGG_NIC | -0.21682  | 0.217811  | 0.044992  | 0.17175   | -0.26481  | -0.24065  | -0.03115  | 0.116895  |
| KEGG_PAN | -0.07864  | 0.027855  | 0.381037  | -0.40194  | -0.2697   | -0.07595  | -0.04799  | -0.17183  |
| KEGG_AMI | 0.341658  | -0.51466  | -0.00473  | 0.478942  | 0.255934  | 0.016666  | -0.55912  | 0.136012  |
| KEGG_BAS | -0.18459  | -0.41581  | -0.10441  | -0.09481  | 0.006632  | -0.17783  | -0.52184  | 0.129659  |
| KEGG_NOI | -0.21896  | 0.002962  | 0.333844  | -0.11149  | 0.345522  | -0.39022  | -0.14091  | -0.01663  |
| KEGG_SNA | 0.121481  | 0.098962  | -0.08621  | 0.293295  | -0.03809  | 0.040361  | -0.35609  | 0.008213  |
| KEGG_LYS | -0.03042  | 0.179398  | 0.290814  | 0.133574  | -0.3283   | -0.31415  | 0.135144  | -0.28527  |
| KEGG_CAR | -0.00183  | 0.109816  | 0.12031   | 0.016873  | -0.32822  | 0.337207  | -0.38782  | 0.02838   |
| KEGG_REN | 0.099416  | -0.23258  | -0.16737  | -0.23574  | -0.36106  | -0.28846  | 0.0877    | -0.09152  |
| KEGG_CIR | -0.21183  | 0.187498  | -0.32518  | -0.06462  | 0.1177    | 0.184333  | 0.441118  | 0.474234  |
| KEGG_TAS | 0.16926   | -0.00904  | 0.401801  | -0.07192  | 0.157257  | 0.215264  | 0.250733  | -0.38932  |
| KEGG_PRC | 0.20575   | 0.351109  | -0.04824  | 0.417107  | -0.57114  | 0.449002  | 0.446611  | -0.41275  |
| KEGG_PAT | -0.06167  | 0.030585  | 0.425583  | -0.04132  | -0.17844  | -0.24406  | 0.19879   | -0.01666  |
| KEGG_SYS | 0.063668  | 0.349497  | 0.5759    | -0.33737  | -0.23296  | -0.42108  | 0.467276  | -0.34269  |
| KEGG_PRI | 0.188498  | 0.218798  | 0.416194  | -0.21048  | 0.275571  | -0.39103  | 0.443292  | -0.04318  |
| KEGG_HYP | -0.05687  | -0.12084  | 0.086649  | 0.069494  | -0.1981   | -0.29318  | 0.046016  | 0.140869  |
| KEGG_ARR | -0.07883  | -0.1244   | 0.091607  | -0.02052  | -0.10831  | -0.42784  | 0.151585  | 0.192721  |
| KEGG_DIL | -0.06037  | -0.05383  | 0.107842  | 0.042364  | -0.23784  | -0.327    | 0.211507  | 0.091524  |
| KEGG_GLY | 0.072288  | 0.513576  | 0.079119  | 0.097064  | 0.00895   | 0.171221  | -0.06975  | 0.230904  |
| KEGG_CIT | -0.40437  | 0.191026  | 0.057283  | -0.40968  | -0.52359  | 0.140989  | 0.014579  | -0.08116  |
| KEGG_PEN | -0.03605  | 0.222059  | -0.03147  | 0.272859  | 0.165461  | -0.29945  | -0.06993  | 0.069244  |
| KEGG_PEN | 0.4222    | 0.173631  | -0.28835  | 0.027994  | -0.25157  | -0.12443  | -0.02663  | 0.032852  |
| KEGG_FRU | 0.041143  | 0.417786  | -0.08866  | 0.238748  | -0.03452  | 0.178922  | -0.20457  | 0.025966  |
| KEGG_GAL | -0.03738  | 0.460453  | -0.32193  | 0.370872  | -0.0871   | -0.20117  | 0.219795  | 0.216549  |
| KEGG_ASC | 0.431533  | 0.31211   | -0.1172   | 0.170229  | -0.2452   | 0.20742   | 0.282316  | -0.03019  |
| KEGG_FAT | 0.388969  | 0.140446  | 0.097069  | 0.098005  | -0.45574  | 0.265654  | 0.333772  | -0.26656  |
| KEGG_STE | 0.360517  | 0.686752  | 0.682824  | 0.645561  | -0.42871  | 0.387066  | 0.325128  | -0.59445  |
| KEGG_PRI | -0.04249  | 0.061569  | -0.1257   | 0.077517  | -0.46029  | 0.23735   | 0.394605  | -0.35699  |
| KEGG_STE | 0.418103  | 0.166733  | 0.140877  | 0.185459  | -0.35065  | 0.185497  | 0.349002  | 0.138468  |
| KEGG_OXI | -0.02219  | -0.16335  | -0.01312  | 0.063074  | -0.12191  | 0.516671  | -0.44829  | -0.22076  |
| KEGG_PUR | 0.030817  | -0.05265  | -0.05892  | -0.03451  | -0.10433  | 0.174969  | -0.13116  | 0.002167  |
| KEGG_PYR | -0.08554  | -0.253    | -0.01986  | -0.09739  | 0.012828  | 0.203688  | -0.27889  | 0.147499  |

|           |          |          |          |          |          |          |          |          |
|-----------|----------|----------|----------|----------|----------|----------|----------|----------|
| KEGG_ALA  | -0.14069 | 0.120813 | -0.00916 | 0.04372  | -0.26631 | 0.212822 | 0.165408 | -0.01413 |
| KEGG_GLY  | 0.119408 | 0.216356 | -0.11392 | -0.07711 | -0.22069 | -0.00235 | 0.366273 | -0.47826 |
| KEGG_CYS  | -0.21916 | 0.234927 | 0.265067 | 0.143234 | -0.33544 | 0.03693  | 0.401935 | -0.20143 |
| KEGG_VAL  | 0.181498 | 0.094109 | -0.19806 | 0.009964 | -0.37494 | 0.316192 | 0.19202  | -0.27347 |
| KEGG_LYSI | -0.15264 | -0.25392 | 0.21323  | 0.127204 | -0.0387  | 0.082528 | 0.143094 | -0.26189 |
| KEGG_ARC  | 0.213883 | 0.142079 | -0.12644 | 0.19505  | -0.32315 | 0.332257 | -0.05095 | -0.255   |
| KEGG_HIS1 | 0.483392 | 0.095231 | 0.115738 | -0.03576 | -0.06515 | 0.325321 | -0.05202 | 0.292219 |
| KEGG_TYR  | 0.383079 | 0.254506 | 0.021766 | -0.14651 | 0.024242 | 0.176755 | 0.209241 | 0.19269  |
| KEGG_PHE  | 0.32421  | 0.35811  | 0.138058 | 0.024815 | 0.016854 | 0.369997 | 0.300335 | 0.11003  |
| KEGG_TRY  | 0.178132 | 0.37535  | 0.221686 | -0.03586 | -0.24687 | 0.029854 | 0.235022 | -0.29621 |
| KEGG_BET  | 0.223575 | 0.006617 | -0.18527 | -0.12948 | -0.31268 | 0.305666 | 0.213561 | -0.09786 |
| KEGG_TAU  | 0.21926  | 0.474294 | 0.230223 | -0.13686 | -0.2498  | 0.328285 | 0.583175 | -0.47684 |
| KEGG_SEL1 | 0.062247 | 0.225617 | 0.281663 | 0.074843 | -0.11919 | 0.223644 | 0.146878 | -0.32572 |
| KEGG_GLU  | 0.227677 | 0.306547 | 0.420625 | -0.10884 | -0.29355 | 0.374814 | 0.382491 | 0.109829 |
| KEGG_STA  | 0.075663 | 0.29815  | -0.18987 | 0.060906 | -0.23348 | -0.20547 | 0.254409 | 0.209422 |
| KEGG_AMI  | -0.38599 | 0.250132 | -0.27689 | 0.072233 | -0.27705 | 0.008814 | 0.074945 | 0.024209 |
| KEGG_GLY  | -0.35605 | -0.09037 | -0.54792 | -0.15284 | 0.494157 | -0.6784  | 0.241596 | 0.287804 |
| KEGG_GLY  | -0.19021 | 0.258404 | -0.38185 | -0.14587 | -0.09903 | -0.4953  | 0.138923 | 0.2859   |
| KEGG_INO  | 0.189901 | -0.0258  | 0.057127 | 0.013398 | -0.33916 | -0.20239 | 0.178433 | -0.24206 |
| KEGG_PYR  | 0.004884 | 0.347562 | -0.20919 | 0.110329 | -0.37229 | 0.316128 | 0.12482  | -0.21972 |
| KEGG_GLY  | 0.065394 | 0.012005 | -0.42519 | -0.43395 | -0.36018 | 0.376581 | 0.290896 | -0.27523 |
| KEGG_PRC  | 0.181727 | 0.103702 | -0.17858 | 0.164756 | -0.39782 | 0.214401 | 0.310463 | -0.43355 |
| KEGG_BUT  | 0.262422 | 0.370452 | -0.06113 | 0.202344 | -0.31699 | 0.391549 | 0.136449 | -0.26791 |
| KEGG_ONE  | 0.170648 | 0.301952 | -0.17308 | 0.013706 | 0.394178 | 0.305165 | 0.017945 | 0.01197  |
| KEGG_FOL  | -0.01863 | 0.260433 | 0.166481 | 0.269435 | 0.030022 | 0.435557 | -0.2525  | -0.03093 |
| KEGG_RET  | 0.449824 | 0.234052 | 0.014899 | -0.00683 | -0.27396 | 0.017542 | 0.292132 | -0.153   |
| KEGG_POR  | 0.454568 | -0.00355 | -0.07313 | 0.080455 | -0.05587 | 0.043502 | 0.057932 | -0.01224 |
| KEGG_TER  | 0.178796 | 0.503027 | 0.504485 | 0.673671 | -0.49541 | 0.22046  | -0.16703 | -0.47125 |
| KEGG_NITI | 0.310478 | 0.152681 | -0.04735 | 0.265542 | -0.15598 | 0.412162 | 0.040022 | -0.02423 |
| KEGG_SUL  | 0.456154 | -0.27576 | 0.269517 | -0.36275 | -0.16361 | -0.07789 | -0.16687 | -0.06687 |
| KEGG_ME1  | 0.451767 | 0.318966 | 0.280721 | 0.036461 | -0.27944 | 0.29883  | 0.209438 | 0.206534 |
| KEGG_DR1  | 0.483754 | 0.336467 | 0.282203 | 0.033616 | -0.27267 | 0.280579 | 0.220028 | 0.175676 |
| KEGG_DR1  | 0.340783 | 0.220677 | -0.07004 | 0.076159 | 0.00035  | 0.162387 | 0.005292 | 0.203996 |
| KEGG_BIO1 | 0.235829 | 0.403676 | -0.07156 | 0.465597 | -0.49968 | -0.05217 | -0.00541 | -0.08547 |
| KEGG_ABC  | 0.035452 | -0.11414 | 0.292946 | -0.22    | -0.3402  | -0.04142 | 0.123411 | 0.20958  |
| KEGG_RIB1 | -0.19106 | -0.61313 | -0.68257 | -0.5238  | 0.475545 | 0.635216 | -0.5547  | -0.34573 |
| KEGG_RNA  | -0.30998 | -0.35962 | 0.080392 | -0.14797 | 0.336355 | 0.310257 | -0.29152 | 0.153643 |
| KEGG_RNA  | -0.31272 | -0.58652 | -0.07953 | -0.02624 | 0.090673 | 0.460316 | -0.47031 | -0.27318 |
| KEGG_DNA  | 0.061404 | -0.07653 | 0.262261 | -0.38537 | 0.433805 | -0.17716 | -0.04796 | 0.498402 |
| KEGG_SPL1 | -0.34104 | -0.48735 | 0.172983 | -0.28705 | 0.067398 | 0.448565 | -0.32946 | 0.123718 |
| KEGG_PRC  | -0.28593 | -0.33094 | 0.220163 | -0.17653 | 0.213692 | 0.25245  | -0.17756 | 0.494699 |
| KEGG_PRC  | -0.71939 | -0.35793 | -0.60074 | -0.54892 | -0.53123 | -0.02673 | -0.32506 | 0.182848 |
| KEGG_PPA  | -0.03435 | 0.285641 | 0.06437  | 0.243922 | -0.43113 | 0.216265 | 0.106021 | -0.24298 |
| KEGG_BAS  | 0.186734 | -0.12002 | 0.320648 | 0.036094 | 0.227054 | 0.272163 | -0.37861 | 0.344197 |
| KEGG_NUC  | -0.01413 | -0.22374 | -0.05763 | -0.05293 | 0.43726  | -0.00131 | -0.34518 | 0.318375 |
| KEGG_MIS  | 0.008373 | 0.062562 | 0.327556 | -0.28443 | 0.365126 | -0.30384 | -0.17328 | 0.353025 |
| KEGG_HOM  | 0.208663 | 0.176985 | 0.043963 | -0.1221  | 0.601482 | -0.31651 | -0.5523  | 0.227747 |
| KEGG_MAI  | -0.05529 | 0.040879 | -0.00101 | -0.07478 | -0.04743 | -0.10381 | 0.248042 | 0.020463 |
| KEGG_ERB  | -0.09792 | 0.014914 | -0.05465 | 0.079288 | 0.012173 | -0.22966 | 0.365479 | 0.020502 |
| KEGG_CAL  | 0.066142 | -0.12252 | -0.08747 | -0.19344 | -0.25441 | -0.25999 | 0.176068 | 0.008029 |

|           |          |          |          |          |          |          |          |          |
|-----------|----------|----------|----------|----------|----------|----------|----------|----------|
| KEGG_CYT  | 0.095622 | 0.258037 | 0.347892 | -0.07913 | 0.049396 | -0.29406 | 0.504471 | -0.16116 |
| KEGG_CHE  | 0.090835 | 0.121675 | 0.400132 | -0.11615 | -0.21773 | -0.30075 | 0.438516 | -0.23352 |
| KEGG_PHC  | 0.198999 | -0.06225 | 0.114383 | 0.103276 | -0.2909  | -0.13395 | 0.183685 | -0.1692  |
| KEGG_NEL  | 0.157645 | -0.00268 | -0.09015 | -0.00652 | -0.16707 | -0.08715 | 0.335501 | -0.10513 |
| KEGG_CELI | -0.08946 | 0.102828 | 0.183184 | -0.33211 | 0.315312 | -0.03913 | 0.007805 | 0.139045 |
| KEGG_OOC  | -0.11242 | 0.20373  | 0.099045 | -0.111   | -0.14399 | 0.123823 | 0.058613 | 0.101595 |
| KEGG_P53  | 0.103711 | 0.208436 | -0.03172 | -0.29602 | 0.000969 | 0.121249 | 0.196431 | 0.030851 |
| KEGG_UBI  | -0.2581  | -0.23353 | 0.097679 | -0.14077 | 0.079444 | -0.07997 | -0.14948 | 0.269239 |
| KEGG_REG  | -0.26448 | -0.12676 | -0.02666 | -0.0468  | -0.34086 | 0.003096 | 0.014089 | -0.28416 |
| KEGG_END  | 0.250712 | 0.113571 | 0.095811 | 0.135361 | -0.06738 | -0.20495 | 0.213831 | 0.007916 |
| KEGG_PER  | 0.278475 | 0.065112 | -0.2351  | 0.097163 | -0.3158  | 0.201186 | -0.15344 | -0.04751 |
| KEGG_MTC  | -0.35111 | -0.15049 | -0.01843 | -0.23028 | 0.062961 | -0.15901 | 0.253102 | 0.143787 |
| KEGG_APC  | 0.14713  | 0.280963 | 0.303453 | 0.003652 | 0.039524 | -0.02316 | 0.402825 | -0.03802 |
| KEGG_VAS  | -0.12278 | -0.08551 | 0.101255 | -0.10689 | -0.36176 | -0.08018 | 0.251402 | -0.09883 |
| KEGG_WN   | 0.071542 | -0.18804 | -0.14378 | -0.19962 | -0.0862  | -0.28405 | 0.107029 | 0.081225 |
| KEGG_DOF  | 0.055714 | 0.286514 | 0.257176 | 0.099764 | 0.037571 | -0.0203  | 0.406602 | -0.12672 |
| KEGG_NO1  | 0.024574 | -0.01508 | 0.279749 | -0.0906  | -0.02461 | -0.2585  | 0.172623 | 0.23411  |
| KEGG_HED  | -0.0575  | -0.27555 | -0.27388 | -0.19285 | 0.241047 | -0.43022 | 0.179788 | 0.080425 |
| KEGG_TGF  | -0.08906 | -0.30551 | -0.05122 | -0.17532 | -0.30544 | -0.41179 | 0.361778 | -0.04147 |
| KEGG_AXC  | -0.0806  | 0.105982 | 0.104576 | 0.024982 | -0.01501 | -0.30053 | 0.248341 | 0.246407 |
| KEGG_VEG  | -0.19015 | 0.104627 | 0.100287 | -0.05316 | -0.0886  | -0.21285 | 0.21574  | 0.122787 |
| KEGG_FOC  | -0.16785 | -0.11456 | 0.223481 | -0.00557 | -0.12933 | -0.48287 | 0.327201 | 0.285925 |
| KEGG_ECM  | -0.2385  | -0.11007 | 0.303136 | -0.02011 | -0.12598 | -0.56749 | 0.355425 | 0.383529 |
| KEGG_CELI | 0.032301 | 0.348064 | 0.448957 | -0.27116 | -0.25202 | -0.36523 | 0.543792 | -0.11511 |
| KEGG_ADF  | 0.162692 | -0.02762 | 0.166725 | 0.033713 | -0.10759 | -0.3738  | 0.318675 | 0.261842 |
| KEGG_TIGI | 0.149796 | 0.228344 | 0.234749 | 0.191466 | -0.23958 | -0.11676 | 0.225501 | 0.012588 |
| KEGG_GAF  | -0.03839 | 0.080376 | 0.143056 | -0.11918 | -0.3185  | -0.19675 | 0.367368 | -0.04733 |
| KEGG_COM  | 0.07348  | 0.458994 | 0.39163  | 0.028043 | -0.33105 | -0.19031 | 0.644042 | -0.23131 |
| KEGG_ANT  | 0.047735 | 0.411153 | 0.514386 | -0.15176 | -0.19334 | -0.1512  | 0.384406 | -0.07498 |
| KEGG_TOL  | -0.08704 | 0.331368 | 0.489642 | -0.01269 | 0.090503 | -0.32328 | 0.397175 | -0.36117 |
| KEGG_NOI  | -0.28071 | 0.437099 | 0.589222 | 0.099622 | 0.192417 | -0.15106 | 0.382362 | -0.19806 |
| KEGG_RIG  | -0.11974 | 0.34195  | 0.471368 | 0.214511 | 0.193272 | 0.007877 | 0.289042 | -0.16995 |
| KEGG_CYT  | 0.045176 | 0.029927 | 0.510137 | 0.156965 | 0.143804 | 0.268187 | 0.257497 | -0.22965 |
| KEGG_JAK  | -0.01924 | 0.234778 | 0.23302  | -0.04296 | -0.03322 | -0.26468 | 0.44354  | -0.20499 |
| KEGG_HEN  | 0.190069 | 0.318065 | 0.338775 | -0.09167 | 0.182424 | -0.3844  | 0.52504  | -0.03858 |
| KEGG_NAT  | 0.076042 | 0.306188 | 0.304839 | -0.15585 | 0.04857  | -0.30132 | 0.44042  | 0.108955 |
| KEGG_T_C  | 0.003007 | 0.212661 | 0.235837 | -0.10475 | -0.03275 | -0.33853 | 0.406015 | -0.06123 |
| KEGG_B_C  | -0.02952 | 0.250061 | 0.305052 | -0.09028 | -0.08689 | -0.29897 | 0.38097  | -0.07736 |
| KEGG_FC   | -0.133   | 0.200425 | 0.121579 | -0.06745 | -0.09286 | -0.23647 | 0.278183 | -0.08503 |
| KEGG_FC   | 0.009273 | 0.211763 | 0.310149 | 0.008192 | -0.24964 | -0.22814 | 0.265057 | -0.101   |
| KEGG_LEU  | 0.088154 | 0.252272 | 0.370718 | -0.02654 | -0.28442 | -0.34867 | 0.398561 | -0.13374 |
| KEGG_INTI | 0.187574 | 0.232538 | 0.394829 | -0.36974 | -0.00353 | -0.38532 | 0.606839 | -0.19635 |
| KEGG_LON  | -0.01833 | -0.0715  | 0.018244 | -0.29072 | -0.41758 | -0.00911 | 0.181894 | 0.048355 |
| KEGG_NEL  | -0.06667 | -0.00242 | 0.099669 | -0.25651 | -0.17613 | -0.26251 | 0.308049 | 0.010108 |
| KEGG_LON  | -0.23909 | 0.194921 | 0.050113 | -0.02536 | -0.20715 | 0.084706 | 0.253786 | 0.007011 |
| KEGG_OLF  | 0.043179 | 0.224426 | 0.313896 | 0.15588  | 0.111536 | 0.167312 | 0.101012 | 0.090826 |
| KEGG_REG  | -0.02255 | -0.08052 | 0.162685 | -0.00938 | -0.1651  | -0.34125 | 0.281934 | 0.150587 |
| KEGG_INSI | -0.15195 | -0.14515 | 0.041718 | -0.00774 | -0.04995 | -0.12138 | 0.143505 | 0.114021 |
| KEGG_GNF  | -0.07593 | 0.100021 | 0.09922  | 0.033214 | -0.21032 | -0.01086 | 0.214687 | 0.005181 |
| KEGG_PRC  | -0.20371 | 0.216415 | 0.147683 | -0.19075 | 0.042128 | -0.13131 | 0.191327 | -0.00413 |

|           |          |          |          |          |          |          |          |          |
|-----------|----------|----------|----------|----------|----------|----------|----------|----------|
| KEGG_MEI  | 0.057128 | -0.17824 | -0.05305 | -0.31422 | -0.21143 | -0.24633 | 0.155966 | -0.01005 |
| KEGG_ADII | -0.11364 | 0.20319  | 0.223569 | 0.280391 | -0.05221 | -0.02445 | 0.138892 | -0.08684 |
| KEGG_TYP  | 0.079342 | 0.253523 | 0.071087 | 0.218928 | -0.2443  | -0.00206 | 0.383994 | -0.08725 |
| KEGG_TYP  | 0.331221 | 0.525275 | 0.562079 | -0.27409 | -0.0402  | 0.005086 | 0.462301 | -0.26626 |
| KEGG_MA   | 0.441551 | 0.619449 | 0.585363 | 0.462635 | -0.54947 | 0.844235 | 0.588877 | -0.62388 |
| KEGG_ALD  | 0.239129 | -0.02055 | 0.025221 | 0.073878 | -0.22261 | -0.02104 | 0.48351  | -0.12464 |
| KEGG_VAS  | 0.147514 | 0.092323 | 0.279686 | -0.10841 | -0.41901 | 0.139563 | 0.259084 | -0.25131 |
| KEGG_ALZ  | -0.07333 | -0.157   | 0.076322 | -0.00803 | -0.29385 | 0.370506 | -0.35813 | -0.08053 |
| KEGG_PAR  | -0.08076 | -0.14249 | 0.051778 | -0.11479 | -0.19829 | 0.482821 | -0.39575 | -0.18177 |
| KEGG_AM   | -0.01045 | 0.075523 | 0.158719 | 0.010685 | -0.26608 | 0.24471  | 0.107634 | -0.23383 |
| KEGG_HUM  | -0.08429 | -0.16321 | -0.00891 | -0.12228 | -0.22124 | 0.367399 | -0.34009 | -0.06923 |
| KEGG_PRI  | -0.07775 | 0.166963 | 0.368455 | -0.20584 | 0.009101 | -0.00206 | 0.516393 | -0.37174 |
| KEGG_VIB  | -0.12435 | 0.138888 | 0.127265 | -0.01087 | -0.23101 | 0.095306 | 0.003989 | -0.2475  |
| KEGG_EPIT | -0.09245 | 0.125549 | 0.287815 | 0.128205 | 0.019893 | -0.08359 | 0.160514 | -0.03415 |
| KEGG_LEIS | 0.021584 | 0.429659 | 0.669492 | -0.06717 | 0.149184 | -0.40594 | 0.554266 | -0.32674 |
| KEGG_PAT  | 0.029458 | 0.07001  | 0.103148 | -0.07165 | 0.020355 | -0.31206 | 0.288236 | 0.103572 |
| KEGG_COL  | 0.197878 | -0.15238 | -0.12842 | -0.21749 | -0.04736 | -0.3522  | 0.327245 | 0.144428 |
| KEGG_REN  | -0.20451 | 0.07171  | 0.133265 | -0.11786 | -0.25716 | -0.27172 | 0.33493  | 0.077004 |
| KEGG_PAN  | 0.108815 | 0.099273 | 0.095334 | -0.01302 | 0.05306  | -0.28172 | 0.370123 | 0.180727 |
| KEGG_END  | 0.08635  | -0.15617 | 0.060969 | -0.12534 | -0.02967 | -0.40849 | 0.395817 | -0.03619 |
| KEGG_GLIC | -0.18193 | -0.21621 | 0.067061 | -0.15294 | -0.10641 | -0.20668 | 0.391177 | -0.07399 |
| KEGG_PRC  | -0.04362 | 0.066077 | 0.234884 | -0.18647 | 0.00604  | -0.27365 | 0.424328 | -0.08997 |
| KEGG_THY  | 0.029019 | -0.01838 | 0.126154 | 0.025572 | -0.0842  | -0.06881 | 0.256226 | 0.177293 |
| KEGG_BAS  | 0.126506 | -0.34322 | -0.28837 | -0.36137 | 0.333926 | -0.50627 | -0.00457 | 0.159456 |
| KEGG_MEI  | -0.17375 | -0.13308 | -0.12195 | -0.23101 | -0.09859 | -0.24563 | 0.336469 | -0.05231 |
| KEGG_BLA  | -0.05096 | 0.112558 | 0.033771 | -0.05809 | -0.02202 | -0.12421 | 0.474246 | -0.14315 |
| KEGG_CHR  | -0.01032 | -0.15229 | 0.142911 | -0.09965 | -0.13001 | -0.20926 | 0.378704 | -0.06675 |
| KEGG_ACL  | 0.068552 | -0.04643 | 0.176608 | -0.16269 | -0.0388  | -0.39556 | 0.406043 | 0.088863 |
| KEGG_SM   | -0.07404 | 0.153712 | 0.328011 | 0.152536 | 0.169989 | -0.28592 | 0.39783  | 0.149418 |
| KEGG_NO   | -0.10093 | -0.00274 | 0.25802  | -0.05503 | -0.04409 | -0.16852 | 0.464215 | -0.19142 |
| KEGG_AST  | -0.07873 | 0.313613 | 0.534714 | -0.47852 | -0.11216 | -0.41155 | 0.483749 | -0.29285 |
| KEGG_AUT  | 0.243806 | 0.415807 | 0.450514 | -0.32789 | -0.07208 | -0.37443 | 0.535862 | -0.21205 |
| KEGG_ALL  | 0.368816 | 0.533079 | 0.583125 | -0.4173  | -0.06776 | -0.38713 | 0.57763  | -0.2746  |
| KEGG_GRA  | 0.246297 | 0.54083  | 0.507607 | -0.35439 | -0.03216 | -0.32876 | 0.619337 | -0.08441 |
| KEGG_VIR  | 0.055288 | 0.326336 | 0.387569 | -0.26986 | -0.09825 | -0.43101 | 0.37266  | 0.012156 |

| TCGA-2J-A | TCGA-2L-A | TCGA-2L-A | TCGA-2L-A | TCGA-2L-A | TCGA-2L-A | TCGA-3A-A | TCGA-3A-A | TCGA-3A-A | TCGA-3A-A |
|-----------|-----------|-----------|-----------|-----------|-----------|-----------|-----------|-----------|-----------|
| 0.121186  | -0.07066  | 0.271684  | -0.33711  | -0.42047  | -0.17777  | -0.02885  | 0.089504  | 0.137931  |           |
| 0.222521  | -0.3587   | 0.426917  | -0.47343  | -0.14799  | 0.219082  | 0.047525  | -0.39326  | -0.61187  |           |
| -0.33837  | -0.15386  | 0.318787  | 0.270139  | -0.11196  | 0.12555   | 0.10872   | 0.214235  | 0.0707    |           |
| -0.177    | 0.114373  | -0.13669  | -0.08961  | -0.11729  | 0.101107  | 0.345773  | -0.15267  | -0.02543  |           |
| 0.012855  | -0.19192  | -0.15242  | 0.310355  | 0.06816   | -0.22264  | 0.502683  | 0.153447  | -0.11082  |           |
| 0.033741  | -0.21193  | 0.142187  | 0.264521  | 0.075772  | 0.328278  | -0.10556  | 0.137273  | -0.33818  |           |
| 0.539202  | 0.176775  | 0.286032  | -0.27142  | -0.03278  | -0.35069  | 0.003418  | 0.140193  | 0.133137  |           |
| 0.078224  | 0.049336  | 0.021263  | 0.093049  | 0.083633  | 0.333978  | -0.10737  | 0.062727  | -0.0419   |           |
| 0.058567  | 0.162378  | 0.009     | 0.227566  | 0.023806  | 0.090927  | -0.11915  | 0.019111  | 0.006206  |           |
| 0.312594  | -0.17237  | 0.028679  | 0.094313  | 0.354968  | 0.223605  | -0.16664  | -0.05256  | -0.2175   |           |
| 0.262638  | 0.001288  | -0.01741  | 0.384537  | 0.028083  | 0.298594  | -0.05085  | -0.1041   | -0.04309  |           |
| 0.252642  | 0.029726  | 0.002132  | 0.257249  | -0.12274  | 0.136002  | -0.11839  | 0.092174  | 0.147363  |           |
| 0.007887  | -0.23477  | 0.364948  | 0.356085  | 0.03198   | 0.453595  | 0.10383   | -0.18262  | -0.40509  |           |
| 0.077039  | -0.08587  | 0.006984  | 0.487984  | 0.344165  | -0.00838  | 0.191732  | 0.428815  | 0.381084  |           |
| -0.20959  | 0.208886  | -0.00203  | 0.43523   | 0.099589  | 0.251382  | 0.457311  | 0.219174  | 0.015388  |           |
| -0.14167  | -0.08779  | -0.39685  | -0.13802  | 0.103412  | 0.123118  | 0.35047   | -0.25771  | -0.42309  |           |
| 0.153464  | -0.23287  | 0.120692  | -0.16432  | -0.01912  | 0.021651  | 0.09694   | -0.03046  | 0.099095  |           |
| 0.209853  | 0.077943  | 0.104006  | 0.082832  | 0.021797  | -0.08005  | -0.08983  | 0.197281  | -0.0873   |           |
| 0.340396  | -0.28643  | 0.16287   | -0.24688  | -0.02846  | 0.36603   | 0.155363  | 0.095404  | -0.17816  |           |
| 0.408796  | 0.193349  | 0.151547  | -0.11663  | -0.21191  | -0.42113  | -0.44446  | 0.120633  | 0.157028  |           |
| -0.24095  | 0.314195  | -0.14142  | 0.233051  | -0.21502  | -0.1176   | -0.00685  | -0.24695  | 0.175658  |           |
| -0.59362  | -0.0975   | 0.143186  | -0.51988  | -0.29599  | -0.23262  | -0.6158   | 0.197573  | -0.42373  |           |
| 0.151564  | 0.21347   | -0.09071  | -0.01533  | 0.185065  | 0.107378  | 0.18307   | -0.12012  | -0.21671  |           |
| -0.16288  | -0.10033  | 0.106656  | -0.1031   | -0.04852  | 0.165142  | -0.09498  | -0.05085  | -0.18132  |           |
| 0.11656   | -0.01013  | 0.167145  | 0.224833  | 0.358437  | 0.321414  | 0.022838  | 0.44534   | 0.034153  |           |
| 0.074782  | -0.03635  | 0.00947   | -0.25949  | -0.06845  | 0.546357  | -0.031    | -0.06247  | -0.07704  |           |
| -0.54065  | -0.24873  | -0.04197  | -0.20088  | -0.19867  | -0.37497  | 0.234449  | -1.16E-05 | 0.344949  |           |
| -0.36373  | -0.00464  | -0.02088  | -0.06688  | -0.16474  | 0.181817  | -0.18815  | -0.21001  | -0.0066   |           |
| 0.445604  | -0.19843  | 0.485241  | 0.006022  | 0.285633  | 0.275057  | -0.42939  | 0.287884  | -0.50041  |           |
| -0.4908   | -0.05352  | 0.003228  | 0.261549  | -0.0344   | 0.397128  | 0.078748  | 0.249596  | 0.002907  |           |
| 0.014274  | -0.51856  | -0.24967  | -0.33872  | 0.022304  | -0.1228   | 0.182293  | -0.53632  | -0.44961  |           |
| -0.20768  | 0.326508  | -0.26283  | 0.097917  | -0.17456  | 0.397171  | -0.22967  | -0.44464  | -0.40763  |           |
| -0.37259  | -0.19318  | -0.04444  | 0.194129  | -0.03728  | 0.279754  | -0.00742  | 0.11618   | 0.097578  |           |
| -0.42544  | -0.22935  | -0.03513  | 0.153366  | -0.12622  | 0.356628  | 0.073593  | 0.203999  | 0.139294  |           |
| -0.35938  | -0.13065  | -0.03484  | 0.05225   | -0.05296  | 0.229151  | 0.056325  | 0.099216  | -0.03664  |           |
| -0.05144  | 0.014031  | 0.411844  | -0.14405  | -0.17589  | 0.370183  | -0.01266  | 0.320602  | -0.00144  |           |
| 0.130918  | -0.29262  | 0.432747  | -0.42311  | -0.16004  | 0.58263   | -0.57008  | 0.54605   | -0.50757  |           |
| 0.246981  | 0.226915  | 0.370637  | -0.15458  | 0.015735  | 0.160505  | 0.108672  | 0.249487  | 0.387215  |           |
| 0.131599  | 0.524307  | 0.456624  | 0.060106  | -0.11342  | 0.563954  | -0.40359  | -0.40623  | -0.32062  |           |
| 0.012035  | -0.04879  | 0.507561  | -0.14065  | -0.20871  | 0.057764  | -0.08708  | 0.288248  | -0.07639  |           |
| -0.02624  | 0.132228  | 0.183868  | -0.34955  | -0.27615  | 0.170207  | -0.13449  | 0.317559  | -0.0899   |           |
| -0.05667  | 0.207125  | 0.428732  | 0.367     | 0.072306  | 0.513483  | -0.08335  | -0.24728  | -0.46191  |           |
| 0.421132  | -0.34509  | 0.453129  | -0.18875  | 0.107285  | 0.57571   | -0.28153  | 0.18033   | -0.41374  |           |
| 0.371113  | -0.39833  | 0.721694  | 0.435906  | 0.424623  | -0.51109  | 0.173286  | 0.474452  | 0.155357  |           |
| 0.036205  | -0.23839  | 0.335304  | -0.1077   | 0.186521  | -0.049    | -0.07986  | -0.3889   | -0.41601  |           |
| 0.088296  | 0.074166  | 0.218178  | 0.373305  | 0.177152  | 0.081914  | -0.28688  | -0.07961  | -0.24846  |           |
| 0.296351  | 0.049037  | 0.141352  | 0.282234  | 0.434018  | 0.404343  | -0.10637  | 0.499853  | -0.12167  |           |
| 0.208634  | -0.05111  | 0.208516  | -0.13541  | 0.007424  | -0.13093  | 0.03212   | 0.036067  | -0.32594  |           |
| 0.285981  | 0.05613   | 0.005593  | -0.02857  | 0.067698  | -0.19301  | 0.022109  | 0.17857   | -0.158    |           |

|          |          |          |          |          |          |          |          |          |
|----------|----------|----------|----------|----------|----------|----------|----------|----------|
| 0.46651  | 0.062428 | 0.223605 | -0.02302 | -0.02063 | 0.060723 | -0.13873 | 0.07898  | -0.22451 |
| 0.558825 | 0.037088 | 0.251937 | -0.24694 | -0.03005 | 0.181563 | -0.22773 | -0.22883 | -0.48166 |
| 0.066703 | -0.13887 | 0.327349 | 0.056745 | -0.22578 | 0.21211  | -0.07816 | -0.01622 | -0.10409 |
| 0.55622  | -0.27201 | 0.334403 | -0.41682 | -0.08652 | 0.143144 | -0.38505 | 0.270386 | -0.18849 |
| 0.147228 | -0.42496 | -0.11861 | -0.21481 | -0.30904 | 0.028035 | -0.09862 | -0.15272 | -0.09361 |
| 0.378743 | -0.22658 | 0.338554 | 0.126439 | 0.148751 | 0.26386  | 0.043193 | 0.286098 | -0.31872 |
| 0.323275 | -0.08196 | -0.03694 | 0.095561 | 0.181808 | 0.152312 | -0.14514 | 0.209287 | 0.009177 |
| 0.375804 | -0.06691 | 0.034809 | -0.04376 | 0.190944 | 0.00024  | -0.14303 | 0.154808 | -0.03709 |
| 0.373806 | -0.07755 | 0.131297 | 0.128877 | 0.109632 | -0.12202 | -0.4427  | 0.34526  | -0.03386 |
| 0.29237  | -0.39993 | 0.135888 | -0.05178 | 0.176417 | 0.151016 | -0.33168 | -0.05894 | -0.443   |
| 0.172721 | -0.35981 | 0.409534 | -0.14288 | -0.13614 | 0.156364 | -0.2578  | 0.011183 | -0.41881 |
| 0.480007 | -0.32399 | 0.465666 | 0.124453 | 0.320057 | -0.39678 | -0.19309 | 0.004183 | -0.48651 |
| 0.359654 | 0.066844 | 0.243081 | -0.20106 | -0.27855 | -0.10098 | -0.38726 | -0.0685  | -0.2263  |
| 0.304336 | -0.26514 | 0.278319 | 0.127182 | 0.280809 | 0.057814 | 0.011703 | 0.158352 | -0.23409 |
| 0.14335  | 0.352556 | 0.264465 | -0.03276 | -0.26308 | 0.377886 | -0.17397 | 0.128376 | -0.08096 |
| 0.113847 | -0.06043 | 0.121131 | -0.23878 | -0.08992 | -0.33865 | 0.343969 | -0.02062 | 0.006729 |
| -0.19645 | 0.044918 | -0.47322 | -0.28403 | -0.15205 | 0.197454 | 0.598245 | -0.17729 | -0.0539  |
| 0.016047 | 0.212834 | -0.17729 | 0.162998 | -0.12068 | 0.067322 | 0.519134 | -0.19444 | -0.03198 |
| -0.377   | 0.130214 | -0.03553 | 0.040557 | -0.25263 | 0.350237 | -0.23291 | -0.20823 | -0.31234 |
| 0.312598 | -0.25258 | 0.251329 | -0.12834 | 0.079556 | 0.267585 | -0.12939 | 0.294133 | -0.41266 |
| 0.53711  | -0.00979 | 0.082225 | 0.096422 | -0.02474 | 0.125829 | -0.27061 | 0.473696 | -0.7333  |
| 0.421536 | -0.59069 | 0.513833 | -0.21136 | 0.106848 | 0.127076 | -0.35414 | -0.0181  | -0.4598  |
| 0.390949 | -0.33112 | 0.435846 | -0.15135 | 0.043564 | 0.15698  | -0.17269 | 0.291775 | -0.34047 |
| 0.481462 | 0.364946 | 0.265866 | -0.2744  | -0.34313 | -0.47215 | 0.01795  | 0.361178 | -0.64001 |
| 0.450572 | 0.23243  | -0.0318  | 0.131444 | 0.485481 | -0.05263 | 0.163746 | 0.529278 | -0.21404 |
| 0.111622 | 0.143006 | 0.287195 | 0.297483 | 0.224792 | 0.402616 | -0.33675 | -0.1339  | -0.43657 |
| 0.291732 | 0.415879 | 0.40144  | 0.193834 | 0.284789 | 0.285825 | -0.19465 | 0.096972 | -0.38632 |
| 0.075685 | -0.38081 | 0.625365 | 0.164241 | 0.611671 | -0.07878 | 0.256007 | 0.60539  | -0.17792 |
| 0.38787  | -0.197   | -0.08246 | 0.380844 | -0.05818 | 0.124712 | -0.04657 | -0.33452 | -0.01456 |
| -0.04317 | -0.38218 | 0.502416 | 0.132602 | 0.208477 | 0.569464 | -0.1286  | -0.15708 | -0.17591 |
| 0.330146 | 0.038803 | 0.223658 | 0.277958 | 0.249862 | 0.427771 | -0.22269 | -0.1735  | -0.28084 |
| 0.33039  | 0.039884 | 0.254007 | 0.251834 | 0.236546 | 0.374509 | -0.29026 | -0.19302 | -0.28373 |
| 0.207952 | 0.314886 | 0.112608 | 0.331253 | 0.197904 | 0.415101 | -0.17788 | 0.057486 | -0.26227 |
| 0.067703 | -0.14632 | 0.478566 | 0.39178  | -0.02219 | 0.305289 | -0.31859 | 0.183173 | 0.061972 |
| -0.17968 | -0.03753 | 0.116166 | 0.056071 | -0.08396 | 0.385394 | -0.17564 | -0.09124 | -0.33872 |
| 0.713305 | -0.01481 | -0.41223 | -0.31757 | 0.40694  | -0.176   | -0.49445 | -0.64106 | -0.52152 |
| 0.06981  | -0.01796 | -0.17524 | -0.24808 | -0.10934 | -0.30805 | -0.38541 | 0.061962 | 0.191001 |
| 0.56085  | -0.14768 | -0.27701 | -0.2869  | 0.116861 | -0.34073 | -0.157   | -0.20172 | -0.09927 |
| 0.426716 | 0.125487 | 0.312641 | -0.21274 | 0.10497  | -0.38907 | 0.105872 | 0.268452 | -0.01139 |
| -0.06359 | -0.06355 | -0.01023 | -0.13712 | 0.026953 | -0.40897 | -0.29151 | -0.35017 | 0.156611 |
| 0.326382 | 0.048795 | 0.191929 | 0.479081 | 0.29066  | 0.000752 | -0.15274 | 0.267693 | -0.12692 |
| 0.571301 | -0.49273 | 0.278121 | -0.15067 | -0.12327 | -0.45157 | -0.35258 | 0.016879 | -0.23339 |
| 0.156029 | 0.057931 | 0.209058 | 0.041508 | 0.164392 | 0.41558  | -0.23265 | 0.163357 | -0.39865 |
| 0.26457  | 0.318285 | 0.018768 | -0.18237 | 0.249643 | -0.25491 | -0.12152 | 0.155734 | 0.108392 |
| 0.14364  | 0.180098 | -0.25845 | -0.31486 | -0.16049 | -0.44776 | -0.36558 | 0.094342 | 0.250004 |
| 0.201964 | 0.007276 | 0.03619  | -0.37303 | -0.27097 | -0.53529 | -0.19767 | 0.285812 | 0.162846 |
| -0.04305 | 0.397729 | -0.03521 | -0.2108  | -0.40812 | -0.44286 | 0.27998  | 0.130287 | 0.108211 |
| -0.28429 | -0.11532 | -0.05842 | 0.161872 | -0.08914 | 0.16469  | 0.037756 | 0.02706  | -0.03299 |
| -0.35449 | -0.0794  | 0.084561 | 0.082166 | -0.42283 | 0.148458 | -0.23288 | -0.09196 | -0.04734 |
| -0.22119 | -0.10471 | -0.07689 | 0.076757 | 0.079185 | 0.307    | 0.035853 | 0.107071 | -0.23606 |

|          |          |          |          |          |          |          |          |          |
|----------|----------|----------|----------|----------|----------|----------|----------|----------|
| -0.1813  | -0.16254 | -0.16598 | 0.183164 | -0.04031 | 0.137313 | 0.085661 | -0.28283 | -0.21744 |
| -0.34941 | -0.1835  | -0.23143 | 0.091863 | -0.16658 | 0.169215 | -0.1239  | -0.2389  | -0.24049 |
| -0.42777 | 0.180182 | -0.14655 | 0.183325 | -0.1885  | 0.338966 | -0.22667 | 0.010661 | -0.33089 |
| 0.042559 | -0.15869 | 0.005291 | 0.039711 | 0.205416 | 0.084662 | 0.091526 | -0.01068 | -0.2694  |
| -0.28394 | -0.00263 | 0.102089 | -0.02223 | -0.24852 | -0.1792  | 0.006651 | 0.192915 | -0.14373 |
| -0.28618 | 0.062897 | 0.180133 | -0.04073 | -0.28017 | -0.1405  | 0.002942 | 0.194278 | -0.21665 |
| -0.18823 | -0.00236 | -0.00975 | 0.201933 | -0.1655  | 0.049909 | 0.056442 | 0.145725 | 0.002837 |
| -0.30013 | 0.085666 | -0.05982 | -0.10838 | -0.24921 | -0.25968 | -0.16673 | 0.112647 | 0.229449 |
| 0.07886  | -0.24341 | 0.075234 | -0.13165 | 0.040575 | -0.21668 | -0.0022  | 0.063114 | -0.02669 |
| -0.31232 | 0.021289 | 0.012664 | 0.111025 | -0.16127 | 0.173986 | 0.00781  | -0.04078 | -0.0603  |
| 0.291519 | 0.386578 | 0.504267 | -0.03382 | 0.174197 | 0.408003 | -0.24149 | 0.235381 | -0.01709 |
| -0.14075 | -0.04968 | -0.26164 | 0.104101 | -0.19732 | -0.08506 | -0.21191 | -0.14956 | -0.05084 |
| -0.35177 | 0.045464 | -0.04691 | 0.150775 | -0.22404 | 0.021927 | -0.24519 | 0.08037  | -0.1149  |
| -0.25671 | 0.002667 | -0.10491 | 0.076052 | -0.04406 | 0.226085 | -0.00694 | -0.01842 | -0.22914 |
| -0.27831 | 0.080374 | -0.05985 | 0.115587 | -0.10402 | 0.209092 | 0.037796 | 0.075596 | -0.03417 |
| -0.48649 | -0.32271 | 0.388273 | 0.180813 | -0.44828 | 0.062178 | -0.24767 | -0.02578 | 0.176483 |
| -0.34832 | -0.03635 | -0.09666 | 0.148127 | -0.08631 | 0.033368 | 0.124109 | -0.12098 | 0.274229 |
| -0.4298  | 0.292251 | 0.012323 | -0.09346 | 0.020042 | 0.215295 | 0.079378 | 0.29852  | -0.25167 |
| -0.43317 | -0.19838 | -0.01961 | -0.37369 | -0.36505 | 0.201084 | -0.04699 | -0.18293 | 0.257856 |
| -0.42415 | 0.102315 | 0.136711 | 0.229084 | -0.09994 | 0.063375 | 0.093684 | 0.271525 | 0.140334 |
| -0.25772 | 0.015253 | -0.12238 | 0.183799 | -0.13329 | 0.197853 | -0.00503 | 0.00212  | -0.03942 |
| -0.46685 | -0.08853 | -0.07901 | -0.00151 | -0.33443 | 0.359207 | 0.105649 | -0.02279 | 0.042953 |
| -0.48898 | -0.19076 | 0.009068 | -0.17808 | -0.31612 | 0.410002 | 0.369124 | -0.0426  | 0.07798  |
| -0.32625 | -0.42149 | -0.02878 | 0.081269 | 0.00786  | 0.390678 | 0.129098 | -0.10548 | -0.33917 |
| -0.46691 | -0.28597 | 0.007808 | 0.238982 | -0.30431 | 0.26129  | 0.067082 | 0.057353 | 0.201671 |
| -0.34383 | 0.029401 | 0.186814 | 0.287601 | -0.03977 | 0.136022 | 0.041044 | 0.18794  | 0.271787 |
| -0.40871 | -0.17334 | 0.096727 | -0.02928 | -0.19511 | 0.208789 | 0.075231 | 0.157128 | -0.14817 |
| 0.122965 | -0.233   | 0.272408 | -0.13352 | 0.143732 | -0.30762 | -0.14665 | -0.24205 | -0.06798 |
| -0.36945 | -0.3951  | 0.022447 | -0.10859 | -0.05735 | 0.208892 | 0.350723 | -0.30244 | -0.37525 |
| -0.34152 | -0.00751 | 0.004035 | 0.021199 | -0.29831 | -0.01055 | -0.06667 | -0.10354 | -0.05924 |
| -0.32251 | -0.28921 | -0.16296 | 0.06787  | -0.35682 | -0.23483 | -0.07568 | -0.20746 | -0.12257 |
| -0.22701 | 0.295708 | 0.024496 | -0.05573 | -0.14724 | 0.184088 | 0.054313 | 0.227038 | 0.077273 |
| 0.167354 | 0.190004 | -0.04678 | -0.2292  | 0.187997 | 0.122628 | -0.01836 | -0.10711 | -0.02236 |
| -0.28805 | -0.00076 | -0.20973 | 0.067973 | -0.2959  | 0.064885 | -0.07458 | -0.36825 | -0.18293 |
| -0.15727 | -0.29513 | -0.21533 | -0.00768 | -0.20308 | 0.303728 | -0.05549 | -0.39471 | -0.43714 |
| -0.3657  | -0.18486 | -0.10764 | 0.24239  | -0.26654 | 0.280348 | -0.10647 | -0.12547 | -0.13041 |
| -0.42967 | 0.007583 | -0.05432 | 0.194841 | -0.40404 | 0.229195 | -0.18351 | -0.1859  | -0.21631 |
| -0.39998 | 0.053212 | -0.0164  | 0.144546 | -0.2813  | 0.24451  | -0.22895 | -0.04173 | -0.16276 |
| -0.30287 | -0.07798 | -0.09471 | 0.112323 | -0.3083  | 0.15448  | -0.2754  | -0.04798 | -0.3019  |
| -0.46078 | -0.01687 | -0.06865 | 0.162078 | -0.17978 | 0.185959 | -0.12977 | -0.07692 | -0.20726 |
| -0.45272 | -0.1469  | -0.05692 | 0.386895 | -0.1476  | 0.242596 | 0.034037 | -0.01542 | -0.023   |
| -0.19739 | -0.36377 | -0.35006 | 0.112362 | 0.125531 | 0.451267 | 0.069423 | -0.44397 | -0.50022 |
| -0.38429 | 0.049099 | 0.003578 | 0.176306 | -0.16529 | 0.131619 | -0.19301 | -0.00766 | -0.2242  |
| -0.43125 | 0.094125 | -0.13593 | 0.138331 | -0.34858 | 0.253183 | -0.11996 | -0.09449 | -0.22454 |
| -0.22466 | -0.12447 | 0.019035 | 0.033297 | -0.19573 | -0.01781 | 0.007261 | 0.109431 | 0.02114  |
| -0.09873 | 0.031246 | 0.228266 | 0.026328 | -0.06467 | 0.239994 | 0.155759 | 0.22949  | 0.086579 |
| -0.41626 | -0.06513 | -0.0621  | 0.105786 | -0.1555  | 0.33079  | 0.037314 | -0.02806 | -0.02271 |
| -0.20581 | 0.080608 | -0.09908 | 0.028477 | -0.22782 | 0.225674 | -0.20379 | 0.013489 | -0.12266 |
| -0.30275 | -0.03432 | -0.05036 | 0.101003 | -0.24169 | 0.174412 | -0.1317  | 0.040793 | -0.08578 |
| -0.19075 | 0.028346 | 0.04204  | -0.11213 | -0.23345 | -0.25281 | -0.03814 | 0.087724 | -0.22472 |

|          |          |          |          |          |          |          |          |          |
|----------|----------|----------|----------|----------|----------|----------|----------|----------|
| -0.37245 | 0.112399 | -0.07981 | -0.16045 | -0.08765 | 0.292546 | 0.207574 | 0.015018 | -0.09576 |
| -0.21928 | -0.02944 | -0.16939 | -0.01911 | -0.09684 | 0.27318  | -0.20615 | 0.064552 | -0.13847 |
| -0.2999  | 0.033141 | 0.028953 | -0.07358 | -0.04025 | -0.01681 | -0.27594 | 0.092634 | -0.35164 |
| -0.27633 | -0.51387 | -0.08972 | -0.2519  | 0.015198 | 0.180235 | 0.22044  | -0.31416 | -0.55937 |
| 0.507511 | -0.53382 | 0.618788 | -0.20385 | 0.554104 | -0.12282 | -0.40909 | 0.275954 | -0.31243 |
| -0.26409 | -0.07059 | -0.05865 | 0.221295 | -0.09364 | -0.10074 | -0.07845 | -0.01813 | -0.21548 |
| -0.33868 | -0.19751 | 0.36337  | -0.03013 | -0.18778 | -0.11923 | -0.36237 | 0.190401 | -0.03886 |
| 0.150855 | -0.1062  | 0.196934 | 0.199456 | 0.276651 | 0.317367 | -0.01176 | 0.439575 | -0.07385 |
| 0.316637 | 0.040992 | 0.184177 | 0.076441 | 0.404107 | 0.46007  | -0.01546 | 0.494032 | -0.25611 |
| -0.02365 | -0.01916 | 0.119604 | 0.118968 | -0.07541 | 0.183367 | 0.015504 | 0.056588 | -0.12963 |
| 0.256904 | 0.070494 | 0.101706 | 0.148211 | 0.246456 | 0.315019 | -0.0467  | 0.415315 | -0.17149 |
| -0.25711 | -0.3257  | -0.03453 | -0.02769 | -0.1278  | -0.13733 | 0.142404 | -0.33059 | -0.44223 |
| -0.26103 | -0.13729 | 0.060224 | 0.389663 | -0.15297 | 0.081419 | -0.11281 | 0.222514 | -0.07562 |
| -0.38726 | 0.033963 | 0.028661 | 0.364603 | -0.33417 | 0.01862  | -0.13441 | 0.133302 | 0.066871 |
| -0.36845 | -0.42102 | -0.16134 | -0.05738 | -0.16781 | 0.045999 | -0.00839 | -0.31761 | -0.32658 |
| -0.38288 | 0.03965  | -0.07864 | 0.005168 | -0.20628 | 0.17514  | 0.044632 | 0.030354 | 0.00722  |
| -0.34168 | 0.087696 | -0.15453 | -0.02011 | -0.35106 | 0.058141 | -0.18188 | 0.102665 | -0.21384 |
| -0.50619 | -0.13226 | 0.111166 | -0.07443 | -0.42029 | 0.196112 | -0.2904  | -0.17578 | 0.022523 |
| -0.37434 | 0.142155 | -0.00291 | 0.100521 | -0.32227 | 0.081109 | -0.12543 | 0.166318 | -0.08748 |
| -0.32863 | 0.0741   | -0.00503 | 0.083963 | -0.3759  | 0.169242 | -0.34638 | -0.06188 | -0.11429 |
| -0.39339 | -0.10256 | -0.03498 | 0.096279 | -0.37267 | 0.307486 | -0.17741 | -0.14288 | -0.10288 |
| -0.34154 | -0.10323 | -0.08947 | -0.09819 | -0.31935 | 0.177645 | -0.13705 | -0.05754 | -0.06497 |
| -0.408   | -0.07796 | 0.149044 | -0.03135 | -0.20584 | 0.258982 | -0.33849 | 0.224753 | 0.115138 |
| -0.3797  | 0.356489 | -0.22867 | -0.18338 | 0.104548 | 0.406978 | 0.363111 | 0.11661  | -0.0886  |
| -0.25526 | -0.07817 | -0.0345  | -0.03305 | -0.13146 | 0.114549 | -0.00899 | -0.11208 | 0.082618 |
| -0.10674 | -0.11815 | 0.005702 | 0.134408 | -0.22992 | 0.06377  | -0.20817 | -0.17524 | 0.08125  |
| -0.4407  | 0.012874 | -0.17634 | 0.075697 | -0.3675  | 0.226764 | -0.21221 | -0.11066 | -0.09145 |
| -0.34825 | -0.08132 | -0.13128 | -0.09344 | -0.32771 | 0.260933 | -0.15548 | -0.1809  | -0.03207 |
| -0.43045 | 0.008923 | -0.06909 | -0.07002 | -0.39828 | -0.02329 | -0.14078 | 0.011569 | 0.030536 |
| -0.36102 | 0.040745 | 0.105176 | 0.034298 | -0.26052 | 0.206366 | -0.30744 | -0.05272 | -0.02224 |
| -0.11677 | -0.43983 | -0.3494  | -0.53646 | 0.038752 | 0.386086 | 0.35962  | -0.50687 | -0.5427  |
| -0.27244 | -0.44707 | -0.20128 | -0.29807 | -0.05209 | 0.231804 | 0.379848 | -0.37873 | -0.4681  |
| -0.31704 | -0.56357 | -0.18829 | -0.29655 | -0.0469  | 0.283339 | 0.378015 | -0.45502 | -0.55082 |
| -0.30533 | -0.60123 | -0.21418 | -0.17002 | -0.01398 | 0.188914 | 0.227283 | -0.49382 | -0.52962 |
| -0.42452 | -0.4051  | -0.1104  | -0.29814 | -0.14974 | 0.27941  | 0.356078 | -0.11549 | -0.26041 |



| TCGA-3A-A | TCGA-F2-6 | TCGA-F2-6 | TCGA-F2-A | TCGA-F2-A | TCGA-F2-A | TCGA-FB-A | TCGA-FB-A | TCGA-FB-A |
|-----------|-----------|-----------|-----------|-----------|-----------|-----------|-----------|-----------|
| 0.249327  | -0.05051  | 0.412507  | -0.20366  | 0.214643  | -0.10473  | -0.15831  | -0.38726  | -0.35466  |
| 0.006171  | -0.36159  | 0.473332  | 0.138127  | -0.59835  | 0.121194  | -0.21771  | -0.23186  | -0.20263  |
| 0.220262  | 0.328769  | -0.11379  | 0.124808  | -0.34512  | 0.137518  | -0.28622  | 0.127796  | 0.19462   |
| -0.13542  | -0.2183   | -0.13269  | -0.13864  | -0.4484   | 0.142978  | -0.03526  | -0.26163  | 0.222186  |
| -0.15946  | -0.04103  | -0.15989  | -0.03251  | -0.14765  | 0.446228  | 0.305753  | -0.25974  | 0.123798  |
| 0.226987  | 0.041196  | -0.0023   | 0.160229  | 0.019218  | 0.179097  | -0.11932  | 0.353449  | -0.03603  |
| 0.489095  | -0.31292  | 0.468604  | -0.17913  | -0.51538  | -0.25389  | 0.024786  | -0.02801  | -0.06435  |
| 0.156635  | 0.032615  | -0.07934  | 0.218421  | -0.10605  | 0.18174   | -0.04872  | 0.232101  | -0.07978  |
| 0.212775  | 0.315254  | 0.042033  | 0.10635   | 0.185634  | 0.252333  | -0.32161  | 0.047658  | -0.23373  |
| -0.04162  | 0.054808  | -0.01649  | 0.040837  | -0.13757  | 0.274436  | -0.14919  | 0.164201  | -0.23146  |
| 0.229592  | 0.357628  | -0.06446  | 0.293224  | -0.06727  | 0.452718  | -0.32164  | 0.337622  | -0.23316  |
| 0.370888  | 0.13429   | 0.200951  | 0.248113  | 0.373617  | 0.243     | -0.32245  | 0.255434  | -0.15637  |
| 0.113912  | -0.01304  | -0.02387  | 0.094484  | -0.42426  | 0.176441  | -0.36484  | -0.22112  | 0.159797  |
| 0.208545  | 0.012054  | -0.12333  | 0.173426  | -0.05456  | 0.034584  | 0.251473  | -0.00321  | -0.22297  |
| -0.14884  | 0.06627   | -0.3711   | -0.10353  | 0.276587  | 0.438268  | 0.219124  | -0.49673  | 0.187063  |
| -0.13459  | 0.094792  | -0.12026  | -0.04149  | -0.33908  | -0.06546  | 0.226184  | -0.50586  | 0.23122   |
| -0.25673  | -0.10555  | 0.177918  | 0.157488  | 0.006578  | 0.071327  | -0.1965   | -0.04615  | 0.050204  |
| 0.220881  | 0.047336  | 0.04343   | -0.28109  | 0.08826   | 0.307927  | -0.23991  | -0.18651  | 0.132398  |
| 0.143341  | -0.35782  | 0.343194  | 0.173126  | 0.420796  | 0.323944  | 0.015485  | -0.19373  | -0.49453  |
| -0.30235  | 0.011605  | 0.213061  | 0.30954   | 0.442789  | 0.492273  | 0.101874  | 0.374518  | -0.55465  |
| -0.0719   | 0.161332  | -0.36006  | 0.232116  | 0.285791  | 0.007061  | 0.02608   | 0.017023  | -0.18315  |
| -0.20737  | 0.223222  | -0.17357  | -0.2772   | 0.407885  | 0.069809  | -0.04677  | -0.30278  | -0.16334  |
| -0.17903  | -0.10438  | 0.017639  | -0.15803  | -0.28454  | -0.10647  | 0.06557   | 0.122074  | 0.131419  |
| -0.30118  | -0.19362  | -0.04654  | -0.1431   | -0.18942  | 0.116185  | -0.08728  | -0.16447  | -0.06751  |
| -0.17424  | -0.03036  | -0.11378  | 0.228038  | -0.11674  | -0.11997  | 0.114582  | -0.00912  | 0.11543   |
| -0.23789  | 0.085904  | 0.078617  | -0.07907  | -0.02957  | -0.32969  | 0.081635  | -0.18016  | 0.326456  |
| 0.060161  | -0.20003  | -0.18918  | 0.463175  | -0.29648  | -0.0654   | -0.37131  | 0.250578  | -0.26734  |
| -0.09328  | 0.096214  | -0.18583  | 0.135308  | -0.2315   | -0.17277  | -0.30309  | 0.255075  | -0.11604  |
| -0.02349  | 0.014935  | 0.456973  | 0.156247  | 0.208726  | 0.233541  | -0.20334  | 0.370661  | 0.369043  |
| -0.1414   | 0.043162  | -0.48219  | 0.054549  | -0.03566  | 0.027954  | -0.09762  | -0.14603  | 0.295531  |
| -0.43762  | -0.31814  | -0.56727  | -0.09594  | 0.481253  | -0.1165   | 0.192536  | -0.05473  | 0.166971  |
| -0.41475  | -0.32695  | -0.54544  | -0.22237  | 0.51397   | -0.26234  | 0.39883   | -0.17212  | -0.14596  |
| 0.250921  | 0.128548  | -0.33029  | 0.083403  | -0.33863  | -0.32055  | -0.27106  | -0.18918  | 0.398801  |
| 0.068516  | -0.0243   | -0.39053  | 0.070901  | -0.26744  | -0.29467  | -0.28237  | -0.25211  | 0.457774  |
| 0.099466  | 0.051236  | -0.27053  | 0.049101  | -0.3194   | -0.31661  | -0.25839  | -0.20142  | 0.440421  |
| 0.285226  | 0.0115    | -0.18968  | 0.291127  | 0.090693  | 0.273693  | -0.1348   | -0.00728  | 0.15231   |
| -0.13603  | -0.01381  | 0.489559  | 0.046642  | 0.59221   | 0.469933  | -0.02974  | -0.51801  | 0.095225  |
| 0.093743  | 0.306513  | -0.19034  | 0.266095  | 0.191338  | 0.490939  | 0.207619  | 0.35149   | -0.09251  |
| 0.173047  | 0.460713  | -0.14345  | 0.285116  | -0.06731  | 0.373282  | -0.16765  | 0.108149  | -0.41026  |
| 0.258974  | 0.137197  | -0.0516   | 0.393869  | 0.01482   | 0.106194  | -0.13343  | 0.218461  | 0.056016  |
| 0.099649  | 0.01487   | -0.24186  | 0.204128  | 0.040443  | 0.319138  | 0.256641  | 0.305221  | -0.01607  |
| 0.184393  | 0.413332  | -0.03015  | 0.069655  | 0.0337    | 0.102993  | -0.40155  | -0.08141  | -0.30917  |
| 0.003351  | -0.02308  | 0.443817  | -0.2121   | 0.362186  | 0.348965  | -0.18933  | 0.126482  | -0.11735  |
| 0.426831  | -0.20154  | 0.190232  | 0.316514  | -0.26863  | 0.252354  | -0.10055  | 0.123935  | -0.62522  |
| -0.40569  | -0.04635  | 0.293998  | -0.39312  | -0.27871  | 0.57684   | -0.38084  | -0.2608   | -0.31638  |
| -0.0021   | 0.254534  | -0.24296  | 0.246404  | -0.22723  | 0.400793  | -0.14526  | 0.104534  | -0.36576  |
| -0.28247  | -0.06179  | 0.152948  | 0.072472  | 0.077385  | 0.107454  | 0.373513  | -0.08867  | -0.0343   |
| 0.121889  | -0.02536  | -0.01328  | -0.02391  | 0.165333  | -0.11712  | 0.140761  | -0.13757  | 0.044555  |
| 0.197009  | 0.051578  | -0.16877  | 0.036787  | 0.365892  | 0.004107  | 0.359032  | -0.04016  | 0.000556  |

|          |          |          |          |          |          |          |          |          |
|----------|----------|----------|----------|----------|----------|----------|----------|----------|
| -0.09047 | 0.053644 | 0.371393 | 0.209369 | 0.339929 | 0.330317 | -0.03657 | 0.184083 | 0.061739 |
| 0.068813 | -0.2336  | 0.63612  | -0.09866 | 0.324989 | 0.124026 | 0.061436 | 0.120462 | 0.236184 |
| -0.01925 | -0.26691 | 0.09444  | 0.225061 | 0.41603  | 0.359985 | 0.033726 | 0.208091 | 0.121634 |
| -0.11856 | 0.228762 | 0.693653 | -0.22923 | 0.331861 | 0.467655 | -0.20304 | 0.007717 | -0.41292 |
| -0.25655 | 0.074606 | 0.471396 | -0.25759 | 0.296598 | -0.07655 | -0.08666 | 0.159049 | -0.03778 |
| 0.082236 | 0.163503 | 0.093287 | 0.11807  | -0.08316 | 0.406082 | -0.08269 | 0.141409 | 0.182864 |
| 0.003789 | 0.040544 | 0.335675 | -0.23853 | -0.21763 | 0.018197 | 0.078841 | 0.174402 | 0.045136 |
| -0.04501 | -0.31785 | 0.205965 | -0.09387 | -0.00042 | 0.195207 | 0.274433 | 0.124759 | 0.194423 |
| -0.09433 | -0.10046 | 0.152799 | 0.152113 | -0.11698 | 0.16085  | 0.31009  | 0.224552 | 0.50557  |
| -0.18192 | -0.14482 | 0.226297 | 0.009344 | 0.228511 | 0.042182 | 0.18537  | 0.21887  | 0.149682 |
| -0.05958 | 0.191599 | 0.356587 | -0.22746 | 0.275312 | 0.206168 | -0.24563 | 0.019269 | -0.11153 |
| -0.27901 | -0.24705 | 0.39199  | -0.21044 | -0.5228  | 0.014896 | -0.36888 | 0.292492 | -0.35879 |
| -0.11119 | -0.0359  | 0.452626 | 0.097618 | 0.133944 | 0.45075  | -0.23764 | 0.241069 | -0.3594  |
| 0.290577 | -0.12368 | -0.04654 | -0.02262 | -0.05137 | 0.201141 | 0.009074 | -0.15726 | -0.33411 |
| 0.334119 | 0.303222 | 0.022182 | 0.274328 | 0.119364 | 0.39243  | -0.09719 | -0.17043 | -0.17794 |
| 0.075588 | -0.30016 | -0.08305 | 0.077003 | -0.06665 | 0.441738 | 0.031843 | -0.09612 | -0.23186 |
| 0.203634 | -0.26938 | -0.35842 | 0.274018 | -0.43031 | -0.14159 | 0.108357 | -0.5145  | 0.3831   |
| 0.223145 | 0.064591 | 0.064591 | 0.160508 | -0.27002 | 0.33638  | -0.24301 | -0.3749  | 0.097635 |
| -0.18772 | 0.067916 | 0.028498 | -0.04626 | -0.24167 | -0.25023 | -0.37867 | 0.118827 | 0.266265 |
| 0.088064 | -0.06176 | 0.275525 | -0.11328 | 0.230302 | 0.366186 | -0.09083 | -0.14882 | 0.060116 |
| 0.349273 | -0.15425 | 0.422788 | 0.32127  | 0.609916 | 0.054763 | 0.38719  | -0.23985 | 0.196491 |
| -0.26942 | 0.06172  | 0.579719 | -0.218   | 0.196718 | 0.184768 | -0.27831 | -0.06942 | -0.26413 |
| 0.042377 | 0.089197 | 0.430437 | 0.006708 | 0.113879 | 0.39052  | -0.22345 | 0.020434 | -0.22938 |
| 0.41739  | -0.26416 | 0.220959 | 0.440655 | 0.460838 | -0.24212 | 0.336908 | -0.07614 | -0.13621 |
| 0.431948 | 0.488263 | -0.10729 | 0.121015 | 0.286413 | 0.198857 | 0.359635 | -0.16383 | -0.43733 |
| 0.036677 | 0.373253 | -0.15561 | 0.08792  | -0.12541 | 0.396233 | -0.13404 | 0.060225 | -0.25643 |
| -0.07839 | 0.329938 | -0.07853 | 0.256341 | 0.293996 | 0.22125  | -0.03397 | -0.27133 | 0.143543 |
| 0.095996 | 0.158637 | -0.02627 | 0.325399 | 0.080324 | 0.571508 | -0.19986 | -0.2064  | -0.49307 |
| 0.369542 | 0.253107 | 0.297093 | 0.472788 | -0.25945 | 0.220443 | -0.24145 | 0.313666 | 0.125111 |
| -0.04467 | 0.299132 | -0.13996 | -0.27885 | -0.17026 | -0.26151 | -0.25    | 0.105659 | -0.34215 |
| -0.08942 | 0.143182 | -0.11225 | -0.05877 | -0.17741 | 0.389865 | -0.14409 | 0.085896 | -0.20914 |
| -0.1906  | 0.126675 | 0.072224 | -0.09392 | -0.18592 | 0.359383 | -0.11854 | 0.131575 | -0.2031  |
| 0.071343 | 0.339208 | -0.28778 | 0.296265 | 0.03715  | 0.355905 | 0.169005 | 0.245309 | -0.04652 |
| 0.477044 | 0.244813 | -0.05691 | -0.06679 | 0.441964 | 0.068574 | -0.02515 | -0.0264  | 0.013538 |
| 0.000252 | -0.09891 | -0.041   | -0.02994 | -0.15024 | 0.163983 | -0.24744 | 0.060173 | 0.157444 |
| -0.36649 | -0.28045 | 0.579097 | 0.200878 | 0.070421 | -0.18626 | 0.62299  | 0.342844 | -0.65089 |
| 0.054279 | 0.030675 | -0.06503 | 0.103023 | 0.430956 | -0.1633  | 0.215607 | 0.018477 | -0.426   |
| -0.2589  | -0.09394 | 0.260432 | -0.08743 | 0.203667 | -0.44968 | 0.637458 | 0.051898 | -0.34241 |
| 0.401634 | 0.051559 | -0.23562 | -0.13836 | 0.62938  | -0.05857 | 0.63639  | -0.33594 | -0.08837 |
| -0.12869 | -0.15565 | -0.3017  | 0.007046 | 0.350874 | -0.3316  | 0.211138 | 0.155058 | -0.36277 |
| -0.40447 | -0.04244 | -0.42467 | -0.31639 | 0.624676 | -0.42423 | 0.676656 | -0.39959 | 0.358996 |
| 0.026359 | 0.014945 | 0.77884  | -0.37217 | 0.25667  | -0.17762 | -0.2119  | -0.57526 | -0.32269 |
| 0.292232 | -0.00515 | 0.095095 | 0.065154 | 0.222543 | 0.264614 | -0.0161  | 0.034797 | -0.04717 |
| 0.125935 | 0.121791 | -0.43415 | 0.055015 | 0.336868 | 0.092477 | 0.480968 | 0.277684 | -0.46339 |
| -0.0522  | 0.078357 | -0.04789 | -0.11049 | 0.424189 | -0.00858 | 0.323025 | -0.21922 | -0.16901 |
| 0.314746 | 0.035084 | -0.15928 | 0.086412 | 0.52931  | -0.09735 | 0.486735 | -0.32242 | -0.28265 |
| 0.479053 | 0.125375 | -0.48972 | 0.187433 | 0.433848 | 0.002213 | 0.326022 | 0.067635 | -0.25797 |
| 0.036486 | -0.0693  | -0.15308 | 0.111926 | 0.02994  | -0.15222 | -0.22034 | -0.13566 | 0.226614 |
| -0.02924 | -0.0564  | -0.02572 | -0.02689 | 0.157232 | -0.15317 | -0.18876 | -0.09792 | 0.319413 |
| -0.10343 | 0.051104 | -0.09723 | -0.08899 | -0.03429 | -0.03354 | -0.11401 | -0.1477  | 0.313467 |

|          |          |          |           |          |          |          |          |          |
|----------|----------|----------|-----------|----------|----------|----------|----------|----------|
| -0.03995 | -0.21592 | -0.3796  | 0.10064   | 0.202624 | -0.2283  | 0.213848 | -0.13339 | 0.251408 |
| -0.25127 | -0.12602 | -0.36704 | -0.03804  | 0.237431 | -0.05525 | -0.07041 | -0.22839 | 0.140424 |
| -0.20664 | 0.067008 | -0.17898 | -0.10804  | -0.26955 | -0.19681 | -0.29978 | 0.152904 | 0.288784 |
| -0.16134 | -0.18215 | 0.101019 | -0.15312  | 0.07379  | -0.1229  | 0.000508 | -0.07492 | 0.230076 |
| 0.307659 | 0.237441 | -0.4257  | 0.236622  | 0.503513 | -0.0867  | 0.248329 | -0.20949 | 0.051215 |
| 0.214423 | 0.283392 | -0.26904 | 0.15853   | 0.302868 | -0.13311 | -0.05749 | -0.1409  | 0.154916 |
| 0.241379 | 0.203301 | -0.35577 | 0.365155  | 0.345069 | 0.009273 | 0.115071 | -0.09998 | -0.05109 |
| 0.082505 | 0.097621 | -0.05265 | 0.089477  | 0.380869 | -0.11291 | -0.15089 | -0.18109 | -0.02816 |
| -0.19095 | -0.17926 | 0.332595 | -0.14571  | 0.091124 | -0.01192 | 0.221709 | 0.265122 | 0.383873 |
| -0.10888 | 0.122255 | -0.15451 | 0.051708  | -0.00348 | 0.024651 | -0.15243 | -0.04519 | 0.101585 |
| -0.1475  | 0.037629 | 0.311195 | -0.16656  | 0.150341 | 0.432632 | -0.12923 | 0.161282 | -0.31339 |
| -0.08721 | -0.12686 | 0.164243 | -5.79E-05 | 0.125437 | -0.11969 | -0.10336 | -0.17273 | 0.103673 |
| -0.05056 | -0.03307 | -0.37492 | 0.217751  | 0.226569 | -0.18417 | -0.1885  | -0.0852  | 0.020319 |
| -0.19622 | 0.058064 | -0.01923 | -0.12013  | -0.05852 | -0.1306  | -0.32285 | -0.10008 | 0.376554 |
| -0.07343 | 0.142593 | -0.15314 | -0.08056  | 0.012931 | 0.150595 | -0.08631 | -0.31509 | 0.245221 |
| 0.072321 | -0.21536 | -0.20024 | -0.05016  | 0.132742 | -0.20247 | -0.44046 | -0.14714 | 0.414719 |
| -0.28755 | -0.10875 | 0.042557 | -0.10047  | 0.04586  | -0.09937 | -0.26284 | 0.03479  | -0.01632 |
| -0.20948 | 0.230128 | -0.24294 | -0.08746  | 0.024626 | 0.181083 | -0.09002 | -0.22364 | 0.220221 |
| -0.0943  | 0.16254  | -0.19232 | -0.02716  | -0.0536  | -0.22166 | -0.2889  | -0.34631 | 0.228929 |
| -0.06854 | 0.045735 | -0.29846 | -0.03041  | 0.116302 | 0.253573 | -0.21441 | -0.31165 | 0.276095 |
| 0.159493 | 0.040085 | -0.1593  | 0.159321  | 0.052085 | 0.152301 | -0.21581 | -0.10687 | -0.0316  |
| -0.07595 | 0.068216 | -0.28344 | -0.04501  | 0.117071 | -0.08701 | -0.28816 | -0.39165 | 0.389513 |
| 0.202638 | 0.062046 | -0.48433 | 0.055063  | -0.11796 | -0.09482 | -0.29599 | -0.42927 | 0.515705 |
| -0.39984 | -0.26054 | -0.43129 | -0.32751  | 0.087157 | -0.21568 | -0.01952 | -0.38869 | 0.344919 |
| 0.088019 | 0.070548 | -0.28946 | 0.028733  | 0.029316 | -0.02922 | -0.32748 | -0.24828 | 0.251796 |
| 0.116648 | 0.094636 | -0.16694 | 0.057633  | -0.07982 | 0.181074 | -0.2696  | -0.15946 | 0.177255 |
| -0.12596 | -0.00539 | 0.00197  | -0.10233  | -0.12231 | -0.15401 | -0.23458 | -0.1153  | 0.397816 |
| 0.063108 | -0.30124 | -0.30537 | -0.16185  | 0.186171 | 0.079382 | -0.04181 | -0.06263 | 0.321701 |
| -0.14661 | -0.17465 | -0.54255 | -0.21074  | 0.465875 | 0.273325 | -0.13588 | -0.25804 | 0.284678 |
| -0.0873  | -0.10472 | -0.36446 | 0.132698  | 0.31508  | -0.22588 | -0.06065 | -0.05491 | 0.077467 |
| -0.00744 | -0.16969 | -0.42707 | 0.166587  | 0.43406  | -0.24448 | -0.06185 | -0.16239 | 0.062675 |
| -0.04055 | -0.21395 | -0.30126 | -0.04817  | 0.285369 | -0.21197 | 0.140727 | 0.066606 | 0.245315 |
| -0.27678 | -0.20117 | -0.27793 | -0.05789  | 0.414105 | -0.36697 | 0.316908 | 0.121619 | 0.209566 |
| -0.11072 | -0.00828 | -0.28363 | 0.062355  | 0.206995 | -0.23979 | -0.04375 | 0.066018 | 0.188277 |
| -0.17357 | -0.23586 | -0.48389 | 0.058782  | 0.219503 | -0.28649 | 0.214139 | -0.06635 | 0.048549 |
| -0.08793 | -0.1467  | -0.39511 | 0.095421  | 0.347394 | -0.11059 | 0.016266 | -0.10154 | 0.161087 |
| -0.09139 | -0.07996 | -0.34664 | -0.00959  | 0.298995 | -0.14611 | -0.21893 | -0.22765 | 0.031532 |
| -0.21413 | -0.05902 | -0.32623 | 0.071083  | 0.281478 | -0.17202 | -0.17933 | -0.17771 | -0.01592 |
| -0.04188 | 0.068141 | -0.18141 | 0.021129  | 0.131491 | 0.020729 | -0.24653 | -0.01866 | -0.03674 |
| -0.18224 | 0.090552 | -0.31764 | -0.09913  | 0.06151  | 0.099953 | -0.13373 | 0.00976  | 0.030979 |
| -0.11743 | -0.11157 | -0.43757 | -0.18563  | 0.095597 | 0.130955 | -0.17628 | -0.33045 | 0.215668 |
| -0.46411 | -0.39586 | -0.57299 | -0.20113  | 0.490665 | 0.064483 | 0.119584 | -0.23742 | 0.086136 |
| -0.03918 | 0.334667 | -0.11694 | 0.082194  | 0.127912 | 0.025595 | -0.29687 | -0.07903 | 0.082959 |
| -0.21873 | 0.017838 | -0.26102 | -0.0647   | 0.185021 | -0.06451 | -0.24886 | -0.29526 | 0.154954 |
| 0.182536 | 0.082105 | 0.018616 | -0.04804  | 0.163564 | -0.04691 | -0.30675 | -0.18918 | 0.150398 |
| 0.087297 | 0.258312 | 0.12566  | 0.269294  | 0.06938  | 0.062319 | 0.076702 | 0.233058 | 0.157853 |
| -0.10181 | 0.102061 | -0.30114 | -0.06415  | 0.182501 | -0.15975 | -0.14354 | -0.21991 | 0.333895 |
| -0.04568 | -0.0074  | 0.004333 | 0.02698   | 0.12042  | 0.030638 | -0.09779 | 0.006023 | 0.201624 |
| -0.02412 | 0.120849 | -0.09941 | 0.105221  | -0.06656 | -0.05981 | -0.30552 | 0.112304 | 0.17732  |
| 0.225635 | 0.086886 | -0.15711 | 0.132415  | 0.276467 | -0.07876 | 0.015631 | -0.243   | 0.260845 |

|          |          |          |          |          |          |          |          |          |
|----------|----------|----------|----------|----------|----------|----------|----------|----------|
| -0.11535 | 0.152457 | -0.0799  | -0.10918 | -0.10447 | 0.027874 | -0.14345 | -0.25757 | 0.318384 |
| -0.05779 | -0.08156 | 0.043461 | 0.046529 | 0.190505 | 0.006759 | -0.1706  | -0.06961 | 0.331502 |
| 0.041364 | 0.073263 | -0.04469 | -0.06077 | 0.24998  | 0.047329 | -0.22286 | 0.068111 | -0.02312 |
| -0.41804 | -0.35844 | -0.52475 | -0.1736  | 0.525595 | 0.030994 | 0.250083 | -0.16155 | -0.07303 |
| -0.20849 | -0.24697 | 0.64129  | -0.46543 | 0.03594  | -0.33557 | -0.29584 | 0.57251  | -0.43168 |
| 0.027588 | 0.146595 | -0.04829 | 0.0077   | 0.135677 | 0.144744 | -0.19101 | -0.0724  | 0.198177 |
| -0.33722 | -0.14405 | -0.10565 | -0.43145 | -0.13621 | -0.32998 | -0.34805 | -0.08307 | 0.243356 |
| -0.20811 | 0.142881 | 0.021838 | 0.095979 | 0.110794 | 0.022048 | 0.110195 | -0.00944 | -0.00595 |
| -0.20043 | -0.10924 | 0.180847 | 0.124823 | 0.168485 | 0.111327 | 0.219999 | -0.09448 | 0.074796 |
| -0.13282 | 0.232846 | -0.31275 | 0.329528 | 0.297838 | -0.02208 | 0.072437 | 0.180902 | -0.09087 |
| -0.205   | 0.07275  | 0.103937 | 0.108043 | 0.27374  | 0.028358 | 0.143571 | 0.014466 | -0.04358 |
| -0.05237 | -0.16357 | -0.27208 | -0.12728 | 0.288224 | -0.32345 | 0.145721 | -0.11454 | 0.37131  |
| 0.004525 | 0.070168 | -0.00855 | -0.15289 | -0.24461 | 0.083606 | -0.05387 | -0.21753 | -0.14525 |
| -0.04015 | -0.04421 | -0.37765 | -0.05474 | 0.107435 | -0.06762 | -0.07458 | -0.19806 | -0.07458 |
| -0.36936 | -0.32316 | -0.57933 | 0.041502 | 0.403917 | -0.0215  | -0.08853 | -0.03686 | -0.0614  |
| 0.049739 | 0.031614 | -0.2954  | 0.048691 | 0.15894  | -0.16391 | -0.16394 | -0.23735 | 0.159691 |
| -0.05841 | 0.130306 | -0.12502 | -0.00871 | 0.206227 | -0.03103 | -0.19795 | -0.27073 | 0.193825 |
| 0.009995 | 0.111683 | -0.07475 | 0.012614 | 0.199884 | -0.12835 | -0.41423 | -0.29287 | 0.130305 |
| 0.000341 | 0.115598 | -0.21873 | -0.01359 | 0.296743 | -0.15589 | -0.19899 | -0.19621 | 0.276795 |
| -0.281   | 0.078067 | 0.040626 | -0.01847 | 0.218021 | -0.06804 | -0.18938 | -0.14956 | 0.137905 |
| -0.09085 | 0.091077 | -0.05802 | -0.06727 | 0.233135 | -0.06892 | -0.1207  | -0.22506 | 0.249076 |
| -0.03378 | 0.13735  | -0.02797 | -0.04574 | 0.248131 | -0.18891 | -0.18614 | -0.26033 | 0.196531 |
| -0.11019 | 0.038781 | -0.18827 | -0.04334 | 0.159412 | -0.27125 | -0.02269 | -0.13706 | -0.06209 |
| -0.19024 | 0.240367 | -0.2871  | -0.11654 | -0.05113 | 0.173782 | 0.087173 | -0.34602 | 0.265809 |
| 0.173575 | 0.132174 | 0.058043 | 0.073438 | 0.205263 | -0.20721 | -0.17652 | -0.20095 | 0.305497 |
| 0.220243 | -0.04237 | -0.03246 | 0.07024  | 0.279764 | -0.15997 | -0.01491 | -0.00897 | 0.091443 |
| -0.02553 | -0.11352 | -0.28989 | 0.079545 | 0.297301 | -0.21755 | -0.2456  | -0.09065 | 0.27104  |
| -0.23358 | -0.31206 | -0.14871 | 0.024834 | 0.224036 | -0.35209 | -0.09394 | -0.07119 | 0.299294 |
| 0.095382 | -0.05673 | -0.43575 | 0.038301 | 0.289809 | -0.27507 | -0.23503 | -0.2616  | 0.147879 |
| -0.19148 | -0.11221 | 0.029702 | -0.15993 | 0.058128 | -0.20634 | -0.16736 | -0.01533 | -0.03078 |
| -0.5532  | -0.34802 | -0.5923  | -0.3576  | 0.408991 | 0.024743 | 0.114331 | -0.28227 | -0.13609 |
| -0.48646 | -0.32129 | -0.53356 | -0.19996 | 0.539189 | 0.18434  | 0.14772  | -0.15277 | 0.254261 |
| -0.50383 | -0.436   | -0.66868 | -0.20032 | 0.590178 | 0.069075 | 0.210921 | -0.24729 | 0.093071 |
| -0.52284 | -0.33528 | -0.55452 | -0.13459 | 0.609531 | 0.117683 | 0.245462 | -0.32244 | 0.17325  |
| -0.28874 | -0.02225 | -0.48541 | 0.132782 | 0.065609 | 0.041335 | -0.15098 | -0.22862 | 0.162258 |



|          |          |          |          |          |          |          |          |          |
|----------|----------|----------|----------|----------|----------|----------|----------|----------|
| 0.093584 | 0.185704 | 0.046442 | -0.02378 | -0.065   | 0.088832 | 0.173095 | 0.554144 | -0.09186 |
| -0.17183 | -0.19653 | -0.00592 | -0.04013 | -0.23426 | -0.32403 | 0.009741 | -0.01032 | -0.36662 |
| 0.062577 | -0.00127 | 0.042975 | -0.25893 | -0.24895 | 0.240705 | 0.094218 | 0.368057 | -0.31393 |
| -0.12414 | -0.21177 | 0.251872 | -0.40476 | -0.24942 | 0.28748  | 0.270054 | -0.01894 | -0.55436 |
| -0.07428 | 0.215603 | -0.0628  | -0.24168 | -0.04978 | -0.03802 | -0.4097  | -0.00793 | -0.43612 |
| -0.07285 | 0.148464 | 0.093875 | -0.18401 | 0.11067  | -0.07774 | 0.238825 | 0.288389 | -0.24868 |
| -0.02046 | 0.312354 | 0.381671 | -0.27039 | 0.115705 | 0.028983 | 0.327834 | 0.136857 | -0.27023 |
| -0.02431 | -0.11689 | 0.33092  | -0.15143 | -0.18817 | 0.199831 | 0.270288 | 0.10971  | -0.18184 |
| 0.254991 | -0.23332 | 0.102797 | -0.04328 | -0.08136 | 0.30272  | -0.13807 | 0.211661 | -0.14113 |
| 0.067294 | -0.16901 | 0.313849 | -0.18347 | -0.34209 | -0.30114 | 0.164531 | -0.27273 | -0.5493  |
| -0.15206 | -0.10194 | -0.09065 | -0.03631 | 0.056106 | -0.05412 | 0.059234 | -0.01064 | -0.51972 |
| 0.215942 | -0.04581 | 0.326037 | 0.272906 | -0.20599 | -0.62337 | 0.329425 | 0.26245  | -0.05827 |
| 0.034482 | 0.13422  | 0.326981 | -0.36873 | 0.028666 | -0.00743 | 0.252648 | 0.228501 | -0.32668 |
| 0.010221 | 0.021604 | 0.473582 | -0.23743 | -0.01146 | 0.020998 | 0.293969 | 0.170099 | -0.30079 |
| 0.294222 | 0.073391 | 0.160958 | 0.377033 | -0.00261 | 0.220432 | 0.045149 | -0.3237  | 0.276835 |
| 0.336501 | 0.012885 | 0.140351 | 0.05998  | -0.01657 | 0.161394 | 0.091085 | 0.089425 | 0.097964 |
| -0.33381 | -0.53235 | -0.14489 | -0.33005 | -0.4517  | -0.17036 | -0.3114  | -0.41336 | -0.30978 |
| -0.06893 | -0.16252 | -0.08666 | -0.23498 | -0.28719 | -0.18022 | -0.21    | -0.26063 | 0.177948 |
| -0.08674 | 0.029018 | 0.001419 | -0.02777 | -0.06775 | -0.32565 | -0.50086 | -0.16163 | 0.097085 |
| 0.272225 | 0.21691  | 0.303733 | -0.21997 | 0.006013 | 0.066024 | 0.263935 | 0.048034 | -0.4957  |
| 0.439595 | 0.209718 | -0.20372 | 0.32457  | -0.37699 | 0.199215 | -0.14181 | 0.452801 | -0.64341 |
| 0.257058 | 0.14908  | 0.094846 | -0.46601 | -0.13504 | -0.06771 | 0.171202 | 0.22944  | -0.64547 |
| 0.158465 | 0.102436 | 0.274612 | -0.26855 | 0.027772 | 0.08241  | 0.365834 | 0.176644 | -0.54437 |
| -0.05694 | 0.543303 | -0.09667 | 0.264169 | 0.241027 | 0.420923 | 0.234673 | 0.548986 | -0.26039 |
| 0.287305 | 0.191517 | -0.33732 | 0.19737  | -0.04348 | 0.542344 | 0.486616 | 0.039603 | -0.47811 |
| 0.282366 | 0.259251 | 0.358611 | 0.188147 | 0.179159 | -0.24047 | 0.371826 | 0.169577 | 0.313064 |
| 0.140219 | 0.118864 | 0.307918 | 0.063005 | 0.083706 | 0.137915 | 0.398435 | 0.09668  | 0.010396 |
| 0.686975 | 0.247172 | 0.426621 | -0.6175  | 0.417193 | 0.207176 | 0.343831 | 0.270696 | -0.5958  |
| 0.288108 | 0.218676 | 0.054705 | -0.35847 | 0.307902 | -0.04134 | 0.44162  | 0.289521 | 0.008301 |
| -0.28205 | -0.05637 | 0.559366 | -0.38861 | -0.16452 | -0.20704 | 0.266085 | 0.111305 | 0.416523 |
| 0.200871 | 0.079042 | 0.532345 | 0.010897 | 0.28183  | -0.15711 | 0.416839 | 0.151228 | 0.038038 |
| 0.152627 | 0.108308 | 0.469157 | -0.05885 | 0.282929 | -0.16414 | 0.396027 | 0.144486 | 0.04862  |
| 0.21405  | 0.264751 | 0.28785  | 0.314384 | 0.262858 | 0.259428 | 0.351061 | 0.168031 | 0.309529 |
| -0.01759 | 0.093522 | -0.08927 | 0.041137 | -0.2028  | 0.262259 | 0.246936 | -0.20828 | -0.42369 |
| 0.131154 | 0.052994 | -0.1478  | -0.21098 | -0.17242 | -0.20438 | -0.19529 | -0.08978 | 0.058965 |
| -0.2812  | 0.245443 | 0.433873 | 0.475709 | 0.462292 | 0.525243 | 0.583397 | 0.664786 | -0.34198 |
| 0.155473 | 0.247327 | -0.25005 | 0.156909 | 0.440858 | 0.415322 | 0.14242  | 0.367267 | -0.20444 |
| -0.45456 | -0.09559 | -0.13772 | -0.41943 | -0.1433  | 0.37472  | 0.1427   | 0.57859  | -0.24523 |
| -0.38865 | 0.313736 | -0.3859  | 0.12967  | -0.05638 | 0.617113 | 0.069171 | -0.02786 | -0.46113 |
| -0.03112 | 0.046552 | -0.06899 | 0.328635 | 0.192705 | 0.3336   | -0.00757 | 0.25262  | -0.18299 |
| -0.4244  | 0.098742 | 0.398534 | 0.369465 | -0.03233 | 0.30843  | 0.44714  | -0.08656 | -0.354   |
| 0.004909 | -0.05942 | -0.51293 | -0.2767  | -0.38728 | 0.138779 | 0.224693 | 0.124827 | -0.56316 |
| 0.166191 | 0.258586 | 0.151648 | 0.13575  | -0.1353  | -0.12766 | 0.103741 | -0.15656 | -0.12888 |
| -0.37111 | 0.264366 | 0.102431 | -0.1434  | 0.427086 | 0.406357 | 0.196061 | 0.383183 | 0.248064 |
| -0.18756 | -0.10089 | -0.26616 | 0.048034 | 0.056777 | 0.579968 | 0.171671 | 0.118367 | -0.29028 |
| -0.48741 | 0.301662 | -0.50701 | -0.15805 | -0.07167 | 0.546699 | 0.029833 | -0.21288 | -0.48403 |
| -0.26091 | 0.501978 | -0.33457 | -0.21385 | 0.212253 | 0.430932 | 0.021317 | -0.01539 | -0.25409 |
| 0.052072 | -0.09522 | -0.08325 | 0.146475 | -0.14318 | -0.18473 | -0.2375  | -0.2445  | 0.001561 |
| -0.08293 | -0.02348 | -0.25759 | 0.235942 | -0.31351 | -0.05868 | -0.43569 | -0.33924 | 0.02838  |
| -0.22193 | -0.08452 | -0.01093 | 0.084107 | -0.25692 | -0.20368 | -0.21595 | -0.2115  | -0.11329 |

|          |          |          |          |          |          |          |          |          |
|----------|----------|----------|----------|----------|----------|----------|----------|----------|
| -0.09653 | -0.2812  | 0.362101 | 0.283615 | -0.28593 | -0.42882 | 0.028945 | -0.30044 | -0.19225 |
| -0.2904  | -0.28268 | 0.212053 | 0.194386 | -0.42456 | -0.37421 | -0.30816 | -0.45983 | -0.28875 |
| -0.20368 | 0.007937 | 0.089346 | 0.024328 | -0.14917 | -0.19315 | -0.50802 | -0.26737 | 0.020393 |
| -0.13549 | -0.19785 | 0.101286 | 0.012946 | -0.27621 | -0.13796 | -0.13463 | -0.21548 | -0.19329 |
| -0.10355 | 0.223693 | -0.41189 | 0.14037  | 0.044707 | 0.485529 | -0.06983 | -0.01636 | -0.20094 |
| -0.15508 | 0.157368 | -0.21901 | 0.134742 | 0.025994 | 0.335588 | -0.11964 | -0.20847 | -0.23463 |
| -0.00599 | 0.253331 | -0.11217 | 0.236825 | -0.07108 | 0.04743  | 0.003134 | 0.147967 | 0.184448 |
| 0.036803 | 0.04927  | -0.28781 | 0.00943  | 0.000123 | 0.15358  | -0.17209 | 0.065376 | -0.07668 |
| 0.108058 | -0.14856 | -0.21282 | 0.099839 | 0.195453 | -0.15466 | 0.031419 | -0.29521 | 0.090087 |
| 0.122487 | -0.01489 | -0.03704 | 0.223216 | -0.14499 | -0.2916  | -0.35819 | -0.22774 | 0.050918 |
| -0.1921  | 0.026685 | 0.302537 | -0.40797 | -0.07842 | 0.140911 | 0.409096 | 0.145866 | 0.039243 |
| -0.04021 | -0.38142 | -0.23385 | 0.125826 | -0.2248  | 0.015053 | -0.38715 | -0.24244 | -0.05026 |
| -0.09109 | 0.061225 | 0.072161 | 0.248391 | -0.16382 | -0.24974 | -0.29148 | -0.21973 | -0.03387 |
| -0.28554 | -0.14561 | 0.048548 | 0.017307 | -0.265   | -0.31275 | -0.26855 | -0.13917 | -0.25553 |
| -0.17617 | -0.0471  | -0.21546 | 0.154776 | -0.10559 | 0.054434 | -0.25431 | -0.14118 | -0.06364 |
| 0.052214 | 0.063799 | -0.16615 | 0.188734 | -0.00866 | -0.29689 | -0.50003 | -0.20876 | -0.00263 |
| -0.18305 | -0.31051 | -0.0421  | 0.081969 | -0.10955 | -0.27319 | -0.37684 | 0.035084 | 0.333135 |
| -0.24834 | -0.00718 | -0.11366 | 0.133417 | -0.16133 | -0.02783 | -0.35106 | -0.11771 | 0.042247 |
| -0.21855 | -0.30618 | -0.35355 | 0.174749 | -0.23181 | -0.29458 | -0.32507 | -0.37709 | -0.2973  |
| -0.05426 | -0.14755 | -0.25672 | 0.317175 | -0.25834 | 0.049424 | -0.40434 | -0.30854 | 0.283287 |
| -0.14583 | -0.10904 | 0.102645 | 0.187215 | -0.15622 | -0.04472 | -0.28612 | -0.10318 | 0.243339 |
| -0.31561 | -0.36067 | -0.35296 | 0.260088 | -0.3638  | -0.15853 | -0.46328 | -0.41681 | 0.018654 |
| -0.25998 | -0.52279 | -0.30163 | 0.235612 | -0.32069 | -0.19554 | -0.51472 | -0.41426 | 0.137495 |
| -0.20202 | -0.41843 | 0.337712 | 0.10824  | -0.50234 | -0.4303  | -0.30028 | -0.44768 | -0.30795 |
| -0.01225 | -0.10404 | -0.32567 | 0.267706 | -0.18812 | -0.00513 | -0.47711 | -0.37978 | -0.09297 |
| 0.016519 | 0.070235 | -0.03871 | 0.331574 | 0.072863 | -0.17928 | -0.30565 | -0.26749 | 0.156378 |
| -0.09215 | -0.01535 | -0.20969 | 0.130312 | -0.2631  | -0.31839 | -0.43157 | -0.34376 | -0.29383 |
| -0.03222 | -0.45411 | 0.31814  | 0.208921 | -0.38668 | -0.47966 | -0.04798 | -0.25742 | -0.13787 |
| 0.135381 | -0.30784 | 0.291735 | 0.122323 | -0.30652 | -0.46075 | -0.1569  | -0.08172 | -0.47185 |
| 0.086461 | -0.1042  | 0.207724 | 0.234249 | -0.12729 | -0.4023  | -0.25937 | -0.37152 | -0.03832 |
| 0.17019  | -0.14091 | 0.034565 | 0.299932 | -0.26847 | -0.32847 | -0.2071  | -0.4309  | -0.1587  |
| 0.130348 | -0.01665 | 0.185743 | 0.271651 | 0.252603 | -0.22446 | 0.082814 | -0.22762 | 0.16077  |
| -0.19905 | 0.012433 | 0.331493 | -0.22345 | 0.189525 | -0.25156 | 0.010906 | 0.235454 | -0.05433 |
| -0.12282 | -0.22489 | 0.175717 | 0.365513 | -0.07956 | -0.30556 | -0.28295 | -0.24368 | -0.08926 |
| -0.21151 | -0.43835 | 0.443742 | 0.272581 | -0.42355 | -0.36736 | -0.18936 | -0.48038 | -0.10217 |
| 0.072095 | -0.16208 | 0.163353 | 0.372892 | -0.17901 | -0.27948 | -0.22322 | -0.31248 | -0.12878 |
| -0.06389 | -0.06812 | 0.011996 | 0.379065 | -0.29608 | -0.19842 | -0.3781  | -0.38186 | -0.08108 |
| -0.18871 | -0.06348 | 0.080453 | 0.284117 | -0.32693 | -0.25847 | -0.38026 | -0.36609 | -0.14855 |
| -0.23099 | -0.03839 | 0.129195 | 0.132415 | -0.34085 | -0.22062 | -0.35973 | -0.26849 | -0.08281 |
| -0.28111 | -0.05628 | 0.110414 | 0.128081 | -0.33913 | -0.34252 | -0.36565 | -0.39447 | -0.04621 |
| -0.21946 | -0.21176 | 0.171286 | 0.291111 | -0.38927 | -0.27452 | -0.34344 | -0.44658 | -0.05376 |
| -0.13746 | -0.44002 | 0.594463 | 0.178182 | -0.47413 | -0.50781 | -0.12928 | -0.31893 | -0.48026 |
| -0.06893 | 0.095789 | -0.09504 | 0.114793 | -0.12564 | -0.10092 | -0.20249 | -0.07017 | -0.09908 |
| -0.23221 | -0.13926 | -0.16312 | 0.041873 | -0.33933 | -0.26872 | -0.45593 | -0.35527 | -0.11398 |
| -0.08398 | 0.02318  | -0.04233 | 0.099024 | -0.23274 | -0.13687 | -0.16598 | -0.11626 | -0.1188  |
| -0.11366 | 0.150077 | 0.312248 | -0.00935 | 0.191894 | -0.12723 | 0.018531 | -0.13936 | 0.138643 |
| -0.25717 | -0.24983 | -0.2175  | 0.24539  | -0.32802 | -0.14034 | -0.38766 | -0.38777 | -0.0377  |
| -0.07227 | -0.00455 | -0.09139 | 0.312705 | -0.12381 | 0.012375 | -0.39411 | -0.29938 | -0.06399 |
| -0.17478 | 0.125418 | 0.056203 | 0.116632 | -0.11947 | -0.17632 | -0.29322 | -0.17887 | 0.068677 |
| -0.13109 | -0.06841 | -0.2823  | 0.233742 | -0.17865 | 0.225054 | -0.27829 | -0.29596 | -0.20896 |

|          |          |          |          |          |          |          |          |          |
|----------|----------|----------|----------|----------|----------|----------|----------|----------|
| -0.28819 | -0.09281 | -0.01832 | 0.016992 | -0.16108 | -0.1494  | -0.216   | -0.26425 | -0.09053 |
| 0.175042 | 0.029143 | -0.11153 | 0.360691 | -0.0192  | 0.005658 | -0.29308 | -0.06003 | 0.10569  |
| 0.050294 | -0.07175 | 0.003991 | 0.230016 | -0.29836 | 0.079826 | -0.41659 | -0.27945 | 0.005404 |
| 0.227476 | -0.34213 | 0.63433  | 0.213827 | -0.48552 | -0.62748 | 0.056715 | -0.30534 | -0.44606 |
| -0.00709 | 0.303106 | 0.436229 | -0.01638 | -0.03898 | -0.16584 | -0.00813 | 0.398064 | -0.24869 |
| -0.01297 | -0.29168 | 0.029329 | 0.357862 | -0.2967  | -0.20772 | -0.33458 | -0.25297 | -0.07187 |
| 0.098992 | -0.19229 | -0.19924 | 0.140268 | -0.01165 | -0.25293 | -0.31746 | -0.25981 | -0.20228 |
| 0.203118 | 0.167503 | 0.117044 | -0.15936 | -0.04131 | 0.180927 | 0.295236 | 0.354346 | -0.26961 |
| 0.261475 | 0.13954  | 0.28758  | -0.12007 | 0.009644 | 0.164567 | 0.575239 | 0.380553 | -0.37349 |
| 0.162982 | 0.256233 | 0.100023 | 0.055653 | -0.01522 | -0.09921 | -0.03762 | -0.03689 | -0.01871 |
| 0.206551 | 0.236915 | 0.10296  | -0.09437 | 0.078938 | 0.117526 | 0.358959 | 0.371453 | -0.32799 |
| -0.0703  | -0.10086 | 0.13538  | 0.163212 | -0.38171 | -0.47072 | -0.39553 | -0.32103 | -0.34642 |
| 0.13332  | 0.203361 | -0.03648 | -0.13394 | -0.32942 | 0.018422 | -0.20848 | -0.11092 | -0.28403 |
| 0.216079 | 0.045944 | 0.040217 | -0.011   | -0.27028 | -0.01094 | -0.22227 | -0.3589  | -0.10807 |
| -0.18472 | -0.4353  | 0.484362 | 0.212943 | -0.52554 | -0.56711 | -0.22148 | -0.55871 | -0.29089 |
| -0.17819 | -0.13752 | -0.17235 | 0.231126 | -0.21353 | -0.11979 | -0.34482 | -0.29191 | 0.038349 |
| -0.3498  | -0.17292 | -0.35601 | 0.101016 | -0.32669 | 0.049227 | -0.46949 | -0.41061 | -0.18699 |
| -0.0695  | -0.0581  | -0.26349 | 0.264422 | -0.3336  | -0.21223 | -0.42764 | -0.3711  | -0.01774 |
| -0.14461 | -0.10009 | -0.27748 | 0.247635 | -0.29115 | 0.102843 | -0.44364 | -0.36801 | -0.0385  |
| -0.2971  | -0.11391 | -0.3337  | 0.208821 | -0.34443 | 0.119895 | -0.62579 | -0.35679 | -0.12047 |
| -0.28946 | -0.16343 | -0.32632 | 0.232245 | -0.44231 | -0.03952 | -0.52484 | -0.28314 | -0.13532 |
| -0.10685 | -0.14943 | -0.36997 | 0.199449 | -0.28581 | -0.0852  | -0.47574 | -0.29485 | -0.11182 |
| -0.17741 | 0.260813 | -0.3227  | 0.236906 | -0.18831 | 0.299084 | -0.47196 | -0.25679 | 0.096575 |
| -0.44879 | -0.29441 | -0.02456 | -0.07695 | -0.02465 | -0.09874 | -0.30599 | -0.1721  | 0.179001 |
| -0.15369 | -0.20286 | -0.32808 | 0.218156 | -0.36347 | -0.14191 | -0.3971  | -0.3073  | -0.14915 |
| 0.019719 | 0.13594  | -0.22752 | 0.302873 | -0.17716 | -0.0073  | -0.51515 | -0.19668 | 0.095309 |
| -0.13378 | -0.00216 | -0.32335 | 0.306511 | -0.25012 | -0.18444 | -0.56883 | -0.24084 | -0.12597 |
| -0.2748  | -0.09758 | -0.04407 | 0.282534 | -0.25582 | -0.21645 | -0.56881 | -0.35792 | -0.15796 |
| -0.12945 | -0.18888 | -0.28356 | 0.387563 | -0.22952 | 0.083811 | -0.41612 | -0.20987 | 0.174551 |
| -0.25329 | -0.03148 | -0.15613 | 0.323395 | -0.39869 | 0.101769 | -0.55491 | -0.33179 | -0.08286 |
| -0.28694 | -0.64382 | 0.669327 | -0.21084 | -0.59165 | -0.575   | -0.0943  | -0.54353 | -0.54985 |
| 0.041978 | -0.5087  | 0.627685 | 0.269527 | -0.31493 | -0.62343 | 0.023993 | -0.3359  | -0.44357 |
| 0.059057 | -0.45502 | 0.665117 | 0.173929 | -0.59098 | -0.73118 | 0.077949 | -0.38717 | -0.49914 |
| 0.212763 | -0.53913 | 0.65117  | 0.335479 | -0.56166 | -0.73366 | 0.099586 | -0.47153 | -0.58119 |
| 0.020896 | -0.49957 | 0.296013 | 0.2      | -0.45415 | -0.50599 | -0.27296 | -0.49775 | -0.22708 |



| TCGA-HV-1 | TCGA-HV-2 | TCGA-HV-3 | TCGA-HV-4 | TCGA-HV-5 | TCGA-HZ-7 | TCGA-HZ-7 | TCGA-HZ-7 | TCGA-HZ-7 |
|-----------|-----------|-----------|-----------|-----------|-----------|-----------|-----------|-----------|
| -0.24186  | 0.179534  | -0.34036  | -0.27484  | 0.111004  | 0.384835  | 0.413916  | -0.07084  | 0.237942  |
| 0.004416  | 0.214576  | -0.31787  | 0.236501  | -0.24079  | 0.235501  | 0.654397  | -0.47187  | 0.38311   |
| -0.05366  | -0.19063  | -0.35841  | -0.41357  | 0.263716  | 0.218799  | 0.320866  | 0.316319  | 0.187306  |
| 0.294935  | 0.104844  | -0.00959  | 0.008937  | -0.16152  | 0.415471  | 0.094863  | -0.23864  | -0.05786  |
| -0.33249  | 0.429438  | 0.027009  | -0.09541  | 0.292985  | 0.256383  | 0.043166  | -0.1591   | -0.30335  |
| 0.139384  | 0.13095   | 0.15158   | -0.09984  | 0.379628  | 0.066381  | -0.10525  | -0.08812  | 0.347176  |
| 0.154477  | 0.273933  | 0.259322  | 0.367781  | 0.407786  | 0.387232  | 0.11741   | -0.01164  | 0.179799  |
| 0.084734  | 0.085684  | 0.178547  | 0.077752  | 0.006147  | -0.03309  | -0.1407   | -0.07147  | 0.191202  |
| 0.154554  | -0.0908   | 0.199446  | 0.045162  | 0.03071   | 0.006047  | 0.108658  | 0.351377  | 0.330202  |
| 0.35302   | 0.093711  | 0.288832  | 0.007075  | 0.087387  | -0.24732  | -0.10485  | -0.06894  | 0.222763  |
| 0.286452  | 0.02481   | 0.340635  | 0.130009  | 0.336235  | 0.014741  | -0.14695  | 0.20375   | 0.416535  |
| 0.34509   | -0.28837  | 0.480542  | 0.098064  | 0.095163  | 0.050191  | 0.035929  | 0.06807   | 0.064067  |
| 0.188953  | 0.328932  | -0.2078   | 0.002823  | 0.075207  | 0.147535  | 0.165435  | 0.094864  | 0.46556   |
| 0.248383  | 0.189446  | 0.31186   | 0.045064  | 0.311343  | 0.358617  | -0.01363  | 0.047805  | -0.23164  |
| -0.14034  | 0.171726  | -0.02861  | 0.113441  | 0.128002  | 0.060028  | 0.273402  | 0.085519  | -0.41988  |
| -0.24345  | 0.383946  | -0.02576  | -0.11688  | -0.05495  | 0.319318  | 0.298229  | -0.3349   | -0.22314  |
| 0.325916  | 0.287845  | 0.118485  | -0.04368  | -0.24565  | -0.17497  | 0.318051  | 0.067589  | 0.007417  |
| 0.141684  | 0.318519  | 0.113428  | -0.01978  | 0.046203  | -0.03519  | -0.05227  | -0.0732   | 0.153219  |
| 0.206194  | 0.121644  | 0.29778   | 0.000831  | 0.174205  | 0.276071  | 0.11727   | 0.179899  | 0.353116  |
| 0.630752  | -0.38974  | 0.056573  | 0.241487  | 0.471984  | 0.356051  | -0.05107  | 0.167058  | 0.541811  |
| -0.27726  | -0.51179  | -0.2281   | -0.18954  | -0.11749  | 0.191832  | -0.09279  | -0.00316  | 0.021616  |
| 0.432407  | -0.43696  | -0.42616  | 0.079576  | 0.402833  | -0.265    | 0.137307  | 0.401178  | 0.518364  |
| -0.28293  | 0.253471  | 0.175187  | -0.02109  | -0.23902  | -0.07963  | -0.07687  | -0.19518  | -0.33458  |
| -0.06849  | 0.414125  | -0.01585  | -0.28241  | -0.14187  | -0.20316  | 0.415439  | -0.25244  | -0.28065  |
| -0.08745  | -0.0053   | 0.26201   | 0.226093  | 0.131668  | -0.00802  | -0.28321  | -0.06826  | 0.091354  |
| -0.13481  | -0.11978  | 0.129804  | -0.19065  | 0.096827  | 0.260276  | -0.28725  | 0.175224  | 0.343403  |
| 0.248926  | -0.34774  | -0.44502  | -0.56581  | -0.19427  | -0.41442  | -0.1672   | 0.116596  | -0.4169   |
| -0.18668  | 0.137237  | -0.23256  | -0.35951  | -0.18366  | -0.24004  | -0.25123  | -0.00062  | -0.12062  |
| -0.0635   | 0.591112  | -0.19291  | 0.257936  | 0.421117  | -0.23283  | 0.26621   | 0.047787  | 0.467181  |
| 0.090192  | 0.275437  | -0.15195  | -0.455    | -0.13171  | -0.20872  | -0.11895  | 0.446395  | -0.05247  |
| -0.14311  | 0.324369  | 0.228226  | -0.18628  | -0.3015   | -0.60306  | 0.674519  | 0.211466  | -0.2444   |
| -0.00646  | 0.426792  | 0.51863   | -0.19065  | -0.19495  | -0.49004  | 0.499417  | 0.105036  | 0.053535  |
| 0.099883  | -0.3186   | -0.27429  | -0.39976  | -0.31218  | -0.19132  | -0.05954  | 0.288293  | 0.041608  |
| 0.164824  | -0.33994  | -0.27266  | -0.30481  | -0.28491  | -0.15647  | -0.09073  | 0.283048  | 0.040014  |
| 0.109023  | -0.20161  | -0.29876  | -0.38867  | -0.34936  | -0.21649  | 0.039607  | 0.259384  | 0.008639  |
| 0.138206  | 0.391271  | 0.163188  | -0.22056  | 0.302913  | -0.00505  | 0.023588  | 0.227625  | 0.418463  |
| -0.07431  | 0.43905   | -0.19946  | -0.20929  | 0.293887  | -0.11372  | 0.408596  | 0.198423  | 0.714977  |
| 0.034401  | 0.158805  | 0.354461  | 0.102816  | 0.424821  | 0.151488  | -0.02764  | 0.083248  | 0.296007  |
| 0.197958  | -0.36758  | 0.24765   | 0.325048  | 0.289686  | 0.253715  | 0.075963  | 0.463766  | 0.439288  |
| 0.093744  | 0.385629  | 0.276463  | -0.21817  | 0.165542  | 0.074459  | -0.10436  | 0.262495  | 0.362655  |
| 0.095475  | 0.358426  | 0.357682  | -0.35124  | 0.020048  | 0.00297   | 0.045747  | 0.238926  | 0.225553  |
| 0.465674  | 0.15513   | -0.07463  | 0.085713  | 0.467473  | 0.326134  | -0.03613  | 0.547387  | 0.575136  |
| 0.085454  | 0.398527  | -0.08539  | 0.04406   | 0.049331  | -0.25022  | 0.274157  | -0.03301  | 0.657198  |
| -0.41431  | -0.19883  | 0.313249  | 0.031097  | 0.730541  | 0.10142   | 0.274422  | 0.152224  | -0.43645  |
| -0.4121   | 0.445001  | -0.37895  | -0.14631  | 0.198064  | 0.036942  | 0.412015  | 0.004157  | 0.573026  |
| 0.228234  | 0.107206  | 0.207304  | 0.073246  | 0.264815  | 0.297421  | -0.17976  | 0.422249  | 0.295397  |
| -0.31927  | 0.3093    | 0.46528   | 0.323981  | 0.302725  | 0.176283  | -0.30128  | -0.44939  | 0.051747  |
| -0.07465  | 0.056581  | 0.12277   | 0.15714   | -0.10873  | 0.051212  | 0.058375  | -0.04085  | 0.119993  |
| -0.08975  | -0.05713  | 0.355975  | 0.297171  | 0.148847  | 0.204466  | -0.07088  | 0.058948  | 0.028756  |

|          |          |          |          |          |          |          |          |          |
|----------|----------|----------|----------|----------|----------|----------|----------|----------|
| 0.099642 | 0.35467  | 0.06126  | 0.391587 | 0.247233 | 0.384447 | 0.095985 | 0.025262 | 0.320323 |
| -0.30717 | 0.318879 | -0.05772 | 0.211821 | -0.21632 | 0.306228 | 0.342405 | -0.08334 | 0.156847 |
| -0.20474 | 0.283831 | -0.14668 | 0.005374 | 0.1199   | 0.138779 | 0.277013 | 0.004588 | 0.309248 |
| 0.055802 | 0.459933 | -0.0306  | -0.07907 | 0.353568 | -0.12164 | 0.208603 | -0.02975 | 0.600309 |
| 0.046206 | 0.203793 | -0.3199  | -0.16397 | 0.031346 | -0.02514 | 0.439192 | 0.092243 | 0.408358 |
| 0.105245 | 0.399871 | 0.073807 | 0.197787 | 0.24747  | 0.180995 | 0.124321 | 0.019046 | 0.351496 |
| 0.053773 | 0.184397 | 0.273988 | 0.181086 | 0.200615 | -0.01956 | -0.06916 | 0.034101 | 0.305988 |
| -0.11594 | 0.157816 | 0.267352 | 0.280259 | 0.038891 | 0.038178 | -0.00968 | -0.2213  | 0.197981 |
| -0.34317 | 0.473229 | 0.295886 | 0.087049 | 0.088061 | -0.28982 | -0.01858 | -0.13368 | 0.175508 |
| 0.083785 | 0.393174 | 0.098052 | -0.12191 | 0.279209 | -0.1608  | 0.459867 | 0.033088 | 0.384835 |
| -0.31673 | 0.408449 | -0.17707 | -0.05946 | -0.09662 | -0.23262 | 0.446898 | 0.131909 | 0.549722 |
| 0.450442 | 0.732706 | -0.12322 | 0.258262 | 0.078185 | -0.61881 | -0.03403 | -0.2719  | -0.15444 |
| 0.200298 | 0.272959 | -0.17604 | 0.052574 | 0.207571 | -0.03313 | 0.160278 | 0.016759 | 0.103409 |
| 0.049015 | 0.32349  | 0.009614 | -0.20023 | 0.270358 | -0.33798 | 0.270382 | -0.0248  | 0.401111 |
| 0.18699  | -0.02538 | 0.071969 | -0.14578 | 0.241642 | 0.177705 | 0.037914 | 0.437251 | 0.389953 |
| -0.20448 | -0.03196 | 0.261867 | 0.018693 | 0.219976 | 0.149013 | 0.306296 | 0.176318 | -0.03633 |
| -0.07729 | -0.13783 | -0.23895 | -0.25814 | -0.35677 | -0.28559 | -0.25827 | -0.40352 | -0.60114 |
| 0.065519 | 0.151098 | -0.00846 | 0.074451 | 0.118851 | 0.13525  | -0.09016 | -0.11823 | -0.27242 |
| 0.182764 | 0.19763  | -0.36923 | -0.21514 | -0.10133 | 0.009716 | 0.123807 | 0.084143 | 0.294572 |
| -0.11473 | 0.366685 | 0.186137 | 0.072827 | 0.266957 | -0.21057 | 0.015831 | 0.042287 | 0.234803 |
| -0.43657 | -0.09805 | 0.187063 | 0.025464 | 0.109239 | 0.42328  | 0.136594 | -0.381   | 0.031523 |
| -0.19464 | 0.467492 | -0.26677 | -0.04916 | 0.324719 | -0.08874 | 0.472653 | -0.00199 | 0.595785 |
| 0.115957 | 0.382821 | 0.313307 | -0.02861 | 0.288393 | -0.03843 | 0.197007 | 0.089886 | 0.486948 |
| 0.020546 | -0.15583 | 0.155472 | 0.493479 | 0.224482 | 0.10232  | 0.137183 | 0.197641 | 0.339809 |
| 0.002791 | 0.243301 | 0.515945 | 0.310804 | 0.292432 | 0.538588 | -0.34463 | 0.143237 | 0.162469 |
| 0.30476  | 0.012706 | 0.107051 | 0.151282 | 0.303693 | 0.317664 | -0.18994 | 0.323221 | 0.537621 |
| 0.192199 | 0.179253 | 0.411309 | 0.231158 | 0.25513  | 0.250422 | -0.16201 | 0.220693 | 0.309486 |
| -0.36254 | -0.33149 | 0.326258 | 0.295888 | 0.655791 | 0.274776 | -0.27573 | 0.202246 | -0.16107 |
| 0.048219 | -0.02624 | -0.18268 | 0.334683 | 0.299195 | 0.20456  | -0.01889 | 0.096049 | 0.372927 |
| 0.295658 | 0.237663 | -0.18305 | -0.27222 | -0.13623 | -0.35924 | 0.158779 | 0.247878 | 0.444811 |
| 0.215057 | 0.14308  | 0.161008 | 0.122608 | 0.330753 | -0.15183 | -0.05463 | 0.292797 | 0.531639 |
| 0.202256 | 0.073496 | 0.084143 | 0.082129 | 0.299409 | -0.14963 | 0.117814 | 0.309064 | 0.562397 |
| 0.203871 | 0.018494 | 0.266687 | 0.250691 | 0.340897 | 0.282058 | -0.25314 | 0.348197 | 0.32455  |
| -0.02979 | -0.2848  | 0.166264 | -0.20159 | 0.125249 | 0.239405 | 0.166679 | 0.23371  | 0.238477 |
| 0.158168 | 0.280652 | -0.05557 | -0.14231 | -0.0394  | 0.054441 | -0.06033 | 0.058311 | 0.252645 |
| -0.61548 | -0.67513 | 0.419345 | 0.679581 | -0.68758 | 0.094611 | -0.38256 | -0.58536 | -0.40712 |
| -0.29877 | -0.41217 | 0.123256 | 0.171275 | -0.08998 | 0.322413 | 0.03081  | 0.099567 | -0.15443 |
| -0.40068 | -0.23337 | 0.330244 | 0.584061 | -0.43278 | 0.180195 | -0.21441 | -0.28945 | -0.20613 |
| -0.35069 | -0.60758 | 0.490956 | 0.414018 | 0.218451 | 0.250871 | 0.034985 | 0.108547 | 0.286084 |
| -0.2212  | -0.39396 | 0.009784 | -0.13944 | -0.28107 | -0.26621 | -0.17885 | 0.011527 | -0.06911 |
| -0.56965 | 0.116162 | 0.400381 | 0.009773 | 0.186082 | 0.322899 | 0.32678  | 0.184686 | -0.35862 |
| -0.53715 | -0.18161 | -0.31256 | -0.37511 | -0.26017 | 0.392296 | 0.588816 | -0.28651 | 0.043051 |
| -0.04278 | 0.130678 | -0.05634 | -0.07575 | 0.058719 | 0.204765 | 0.100586 | 0.181145 | 0.433447 |
| 0.315648 | -0.3507  | 0.552786 | 0.25353  | 0.267875 | 0.097623 | -0.34243 | 0.02862  | 0.18199  |
| -0.39079 | -0.43187 | 0.134814 | 0.20446  | -0.0471  | 0.033506 | -0.13484 | 0.095747 | 0.017367 |
| -0.31734 | -0.60365 | 0.261946 | 0.076022 | 0.142661 | 0.31155  | 0.109917 | 0.351916 | 0.399226 |
| -0.16771 | -0.62798 | 0.355327 | 0.281993 | 0.427413 | 0.376831 | -0.10774 | -0.16105 | 0.157973 |
| -0.1074  | -0.11227 | -0.1871  | -0.25343 | -0.23228 | -0.19733 | 0.087515 | 0.186911 | -0.0749  |
| -0.1066  | 0.104564 | -0.3456  | -0.37648 | -0.23517 | 0.005423 | 0.281813 | 0.271033 | 0.239837 |
| -0.05825 | 0.110745 | -0.15579 | -0.1877  | -0.09995 | 0.075635 | 0.106946 | 0.110578 | 0.257832 |

|          |          |          |          |          |          |          |          |          |
|----------|----------|----------|----------|----------|----------|----------|----------|----------|
| -0.07647 | 0.092559 | 0.21477  | -0.3145  | -0.29429 | -0.2908  | 0.298355 | 0.007024 | -0.12602 |
| -0.22343 | 0.289565 | -0.04677 | -0.36831 | -0.31949 | -0.28136 | 0.334593 | 0.061566 | 0.187501 |
| 0.125782 | 0.152562 | -0.20165 | -0.21414 | -0.10931 | 0.01319  | 0.135326 | 0.091672 | 0.299822 |
| -0.05899 | 0.150974 | -0.03088 | -0.06614 | -0.14453 | -0.18839 | 0.108982 | 0.019619 | 0.080224 |
| -0.18671 | -0.37396 | -0.03772 | -0.21039 | 0.167461 | 0.150242 | 0.008439 | 0.353321 | 0.222554 |
| -0.22915 | 0.076677 | -0.12927 | -0.32671 | -0.07265 | -0.02521 | 0.156209 | 0.347175 | 0.243848 |
| 0.226262 | -0.35405 | 0.055211 | -0.17942 | -0.00325 | -0.03226 | -0.00982 | 0.26081  | -0.18726 |
| -0.19161 | -0.21802 | -0.25892 | -0.25885 | -0.07925 | 0.058437 | 0.250061 | 0.196689 | -0.00747 |
| 0.055966 | -0.05073 | -0.27301 | -0.20811 | -0.33808 | 0.083133 | 0.029072 | 0.068476 | 0.354041 |
| 0.027737 | 0.089306 | -0.16769 | -0.25957 | -0.0328  | -0.22876 | 0.036351 | 0.178981 | -0.01126 |
| 0.069443 | 0.046197 | 0.121712 | 0.082248 | 0.30301  | 0.226806 | 0.058032 | -0.00919 | 0.403505 |
| -0.17182 | 0.102893 | -0.2556  | -0.26768 | -0.11469 | 0.03601  | 0.127875 | 0.118617 | 0.197015 |
| 0.006663 | 0.104569 | -0.13216 | -0.30669 | -0.16639 | -0.20736 | 0.279533 | 0.322395 | 0.055051 |
| 0.035282 | 0.221339 | -0.19807 | -0.36647 | -0.35828 | -0.22405 | 0.13841  | 0.132151 | 0.300729 |
| -0.0897  | -0.06236 | -0.26297 | -0.23338 | -0.02879 | -0.08141 | -0.027   | 0.175781 | 0.051551 |
| -0.03421 | 0.357456 | -0.41727 | -0.49459 | -0.25503 | -0.25686 | 0.346928 | 0.19131  | 0.152832 |
| 0.460858 | 0.315112 | -0.24403 | -0.33679 | 0.027323 | -0.33445 | -0.13902 | -0.12184 | -0.22946 |
| 0.182865 | 0.068082 | -0.26387 | -0.39567 | 0.087954 | -0.22423 | -0.10322 | 0.240189 | -0.15434 |
| 0.048489 | -0.06612 | -0.47411 | -0.54734 | -0.33352 | -0.37797 | 0.240425 | 0.333221 | -0.16526 |
| -0.07257 | 0.130433 | -0.2215  | -0.39703 | -0.04384 | -0.21993 | -0.03109 | 0.272629 | -0.01164 |
| -0.06441 | 0.14523  | 0.016271 | -0.18084 | -0.08477 | 0.060026 | 0.030338 | 0.201321 | 0.075003 |
| -0.00471 | 0.096104 | -0.41655 | -0.51758 | -0.38279 | -0.31498 | 0.126731 | 0.269408 | 0.09545  |
| 0.28301  | 0.042732 | -0.43305 | -0.53708 | -0.32075 | -0.37063 | -0.0042  | 0.102432 | -0.10494 |
| -0.16109 | 0.373782 | 0.057733 | -0.41202 | -0.24212 | -0.4538  | 0.428943 | 0.184231 | -0.02377 |
| -0.15717 | -0.0727  | -0.40906 | -0.38888 | -0.23669 | -0.1644  | 0.077726 | 0.397751 | 0.233908 |
| 0.124703 | 0.150874 | -0.19915 | -0.31644 | -0.06422 | -0.18001 | -0.13652 | 0.295462 | 0.114501 |
| -0.07468 | 0.203584 | -0.36119 | -0.43575 | -0.1892  | -0.00357 | 0.193815 | 0.308663 | 0.246929 |
| -0.16356 | 0.425331 | -0.19445 | -0.20123 | -0.40478 | -0.37073 | 0.308367 | 0.162827 | 0.04789  |
| 0.096028 | 0.25444  | 0.123579 | -0.37043 | 0.272166 | -0.38252 | 0.55153  | 0.207081 | 0.036037 |
| 0.025394 | 0.139899 | -0.07756 | -0.36911 | -0.34852 | -0.14234 | 0.335393 | 0.209786 | -0.09915 |
| -0.28745 | -0.05214 | -0.14752 | -0.37498 | -0.31739 | -0.26708 | 0.282306 | -0.11444 | 0.052673 |
| 0.025519 | 0.047972 | 0.043553 | -0.12994 | -0.04021 | 0.047636 | 0.050419 | 0.03885  | -0.20397 |
| 0.140349 | -0.00511 | 0.252821 | 0.181537 | 0.003759 | -0.05374 | 0.070801 | -0.20127 | -0.11658 |
| 0.020148 | 0.048146 | -0.09881 | -0.32514 | -0.25658 | -0.22358 | 0.270449 | 0.149556 | -0.04511 |
| -0.27914 | 0.05942  | 0.217416 | -0.39336 | -0.41692 | -0.35993 | 0.317026 | 0.174958 | 0.061967 |
| -0.0784  | 0.08635  | 0.103021 | -0.31683 | -0.23053 | -0.17323 | 0.424843 | 0.250439 | 0.07521  |
| -0.3444  | 0.200804 | -0.14981 | -0.37357 | -0.34395 | -0.25383 | 0.400427 | 0.324029 | 0.097496 |
| -0.25814 | 0.279126 | 0.065372 | -0.38122 | -0.24669 | -0.23797 | 0.305303 | 0.245117 | 0.102683 |
| -0.1706  | 0.022023 | -0.0568  | -0.25315 | -0.24747 | -0.00579 | 0.335183 | 0.335657 | 0.285127 |
| 0.073721 | 0.252892 | -0.04566 | -0.34572 | -0.14554 | -0.31062 | 0.16461  | 0.269925 | 0.130596 |
| -0.11806 | 0.309266 | -0.14367 | -0.33739 | -0.29905 | -0.37313 | 0.125783 | 0.259208 | 0.08191  |
| -0.16708 | 0.37389  | 0.425518 | -0.14595 | -0.20792 | -0.53127 | 0.602601 | 0.255175 | 0.196272 |
| -0.10897 | 0.186695 | -0.26629 | -0.30748 | -0.24965 | 0.18058  | 0.242537 | 0.370537 | 0.405455 |
| -0.16248 | 0.140975 | -0.32275 | -0.46549 | -0.28605 | -0.00244 | 0.311315 | 0.29619  | 0.212533 |
| -0.09481 | 0.168333 | -0.09234 | -0.36696 | -0.12082 | 0.02349  | 0.130442 | 0.247197 | 0.243143 |
| 0.161727 | 0.113893 | 0.036352 | 0.478059 | 0.220529 | 0.078115 | 0.208746 | 0.116146 | 0.193887 |
| -0.0488  | 0.052457 | -0.2489  | -0.34761 | -0.22242 | -0.28963 | 0.162966 | 0.241017 | 0.036242 |
| -0.15244 | 0.046656 | -0.2345  | -0.23454 | -0.21241 | -0.02646 | 0.162107 | 0.081186 | 0.248445 |
| 0.068301 | 0.059172 | -0.13937 | -0.29007 | -0.12692 | -0.02032 | 0.110061 | 0.225697 | 0.347667 |
| -0.29509 | -0.01473 | -0.23001 | -0.27029 | -0.30565 | 0.115918 | 0.12984  | 0.302251 | 0.182869 |

|           |          |          |          |          |          |          |          |          |
|-----------|----------|----------|----------|----------|----------|----------|----------|----------|
| 0.120495  | 0.100769 | -0.21817 | -0.33387 | -0.05498 | -0.01079 | 0.010208 | 0.14593  | 0.185545 |
| -0.09848  | 0.112664 | -0.28342 | -0.24276 | -0.15306 | 0.069316 | -0.02188 | 0.110779 | 0.175373 |
| -7.67E-05 | 0.132233 | -0.33358 | -0.1954  | -0.14401 | 0.152061 | 0.320108 | 0.354548 | 0.231771 |
| 0.021574  | 0.396696 | 0.406982 | -0.25821 | 0.157068 | -0.42383 | 0.600816 | 0.243965 | -0.16611 |
| 0.386753  | 0.721774 | 0.043762 | 0.134605 | 0.227337 | 0.102045 | 0.264156 | 0.096461 | 0.386214 |
| -0.27622  | 0.270427 | -0.26306 | -0.14445 | -0.01123 | 0.256104 | 0.401196 | 0.254618 | 0.260907 |
| -0.15844  | 0.288214 | -0.269   | -0.44571 | -0.30979 | -0.29768 | 0.11861  | 0.274602 | 0.204285 |
| -0.13165  | 0.134333 | 0.28822  | 0.139515 | 0.295367 | 0.219676 | -0.13423 | -0.12675 | 0.278563 |
| -0.19605  | 0.317332 | 0.402092 | 0.22117  | 0.385547 | 0.188336 | -0.30991 | -0.40562 | 0.332004 |
| 0.091159  | 0.22309  | 0.044152 | 0.02352  | -0.14187 | 0.180981 | 0.13933  | 0.267957 | 0.160082 |
| -0.13873  | 0.162182 | 0.308554 | 0.236951 | 0.248276 | 0.212317 | -0.22597 | -0.18184 | 0.288437 |
| -0.22266  | 0.28577  | -0.26372 | -0.27802 | -0.41355 | -0.4027  | 0.446461 | -0.1043  | -0.04876 |
| -0.3192   | 0.440661 | -0.08424 | -0.25796 | 0.070264 | 0.147677 | 0.299852 | -0.0665  | -0.07829 |
| -0.30204  | 0.18561  | -0.2012  | -0.34167 | -0.19274 | -0.15494 | 0.147745 | 0.134148 | -0.1063  |
| -0.04823  | 0.277906 | 0.017242 | -0.42294 | -0.36742 | -0.48785 | 0.541597 | 0.151497 | -0.29093 |
| 0.048613  | 0.000864 | -0.25054 | -0.34008 | -0.15351 | -0.19048 | 0.05729  | 0.230605 | 0.022244 |
| -0.0595   | -0.00566 | -0.26036 | -0.25818 | -0.39879 | 0.045962 | 0.205705 | 0.279289 | 0.184516 |
| -0.21648  | 0.300165 | -0.41995 | -0.39212 | -0.30715 | -0.05399 | 0.316201 | 0.357521 | 0.2974   |
| -0.17764  | 0.072235 | -0.34784 | -0.3863  | -0.22693 | -0.11068 | 0.239354 | 0.303741 | 0.150347 |
| -0.12251  | 0.157532 | -0.35424 | -0.30225 | -0.29399 | 0.096586 | 0.272363 | 0.201864 | 0.259995 |
| -0.194    | 0.120213 | -0.36523 | -0.43229 | -0.21804 | 0.033302 | 0.33303  | 0.245445 | 0.255664 |
| -0.11472  | 0.035626 | -0.38876 | -0.45156 | -0.20036 | -0.07122 | 0.28973  | 0.228189 | 0.186219 |
| -0.01743  | -0.0708  | -0.273   | -0.36213 | -0.09943 | 0.055789 | 0.062604 | 0.271713 | 0.342224 |
| 0.319017  | 0.083324 | -0.15909 | -0.25939 | 0.069892 | -0.08879 | -0.26075 | -0.03766 | -0.27141 |
| -0.18296  | -0.02808 | -0.31528 | -0.25035 | -0.21325 | -0.08214 | 0.237974 | 0.129879 | -0.06751 |
| -0.03359  | 0.087718 | -0.3588  | -0.35994 | -0.1289  | 0.128055 | 0.123316 | -0.04213 | 0.083177 |
| -0.01675  | 0.169691 | -0.38218 | -0.38699 | -0.33162 | -0.14604 | 0.221991 | 0.247151 | 0.130231 |
| -0.09277  | 0.149102 | -0.20029 | -0.40026 | -0.36605 | -0.21328 | 0.109176 | 0.090053 | 0.078843 |
| 0.032662  | 0.016785 | -0.35315 | -0.41377 | -0.27206 | -0.16941 | 0.144141 | 0.221999 | 0.027927 |
| -0.25363  | 0.339632 | -0.26245 | -0.34221 | -0.20152 | -0.03905 | 0.284675 | 0.075029 | 0.260631 |
| 0.067513  | 0.153455 | 0.249259 | -0.17937 | -0.11419 | -0.61135 | 0.693855 | 0.372505 | 0.006004 |
| -0.03989  | 0.317782 | 0.392262 | -0.06821 | 0.14835  | -0.57518 | 0.602341 | 0.36739  | -0.09919 |
| 0.012199  | 0.387    | 0.462949 | -0.21836 | 0.147021 | -0.57071 | 0.659911 | 0.272491 | -0.20987 |
| 0.009359  | 0.169791 | 0.402902 | -0.36225 | 0.048381 | -0.51013 | 0.702018 | 0.330361 | -0.08372 |
| 0.219362  | 0.192666 | 0.124515 | -0.4257  | 0.056334 | -0.42041 | 0.383425 | 0.257754 | -0.05295 |

| TCGA-HZ-7 | TCGA-HZ-8 | TCGA-HZ-8 | TCGA-HZ-8 | TCGA-HZ-A | TCGA-HZ-A | TCGA-HZ-A | TCGA-HZ-A | TCGA-HZ-A |
|-----------|-----------|-----------|-----------|-----------|-----------|-----------|-----------|-----------|
| 0.214636  | -0.19428  | 0.08714   | 0.316972  | -0.18689  | 0.223892  | -0.03627  | -0.13567  | -0.22769  |
| -0.19657  | -0.11467  | 0.536291  | 0.279011  | 0.659584  | -0.18461  | 0.236319  | -0.38602  | 0.080328  |
| 0.452042  | 0.219438  | -0.41791  | 0.252523  | -0.09789  | 0.168625  | 0.075727  | 0.137554  | 0.286529  |
| 0.048987  | -0.24027  | 0.112322  | -0.18283  | 0.234962  | -0.02477  | 0.21541   | -0.03679  | -0.19386  |
| -0.04993  | -0.49765  | -0.37718  | -0.29833  | -0.02667  | 0.290845  | -0.04562  | 0.250409  | 0.301281  |
| 0.080895  | -0.22536  | -0.02462  | 0.181272  | 0.239514  | 0.171908  | -0.03074  | 0.189225  | 0.196056  |
| 0.312985  | -0.4231   | -0.31938  | 0.363132  | -0.17877  | 0.074787  | 0.171405  | -0.39984  | -0.00077  |
| -0.04969  | -0.28314  | -0.00552  | 0.159589  | 0.302078  | 0.122562  | 0.087455  | 0.0699    | 0.181971  |
| 0.048153  | 0.163152  | 0.116101  | 0.300035  | 0.389832  | 0.248229  | 0.2375    | 0.326621  | 0.019541  |
| -0.04806  | -0.06435  | 0.033041  | 0.253176  | 0.438851  | 0.324721  | 0.303643  | 0.155197  | 0.330264  |
| 0.164631  | 0.106446  | 0.012779  | 0.527062  | 0.378995  | 0.350146  | 0.488834  | 0.389535  | 0.092775  |
| -0.23986  | -0.0812   | 0.060469  | 0.321156  | 0.44593   | 0.341472  | 0.270482  | 0.380117  | -0.2314   |
| 0.264453  | 0.034426  | 0.092426  | 0.240632  | 0.177507  | -0.19929  | -0.10109  | -0.13962  | 0.187791  |
| -0.0657   | -0.24095  | -0.35478  | -0.17203  | 0.168036  | 0.220051  | 0.089898  | 0.025371  | 0.110427  |
| 0.143767  | 0.192949  | -0.2817   | -0.31279  | 0.413412  | 0.039621  | -0.16892  | -0.14293  | 0.385592  |
| -0.0568   | -0.38128  | 0.012298  | -0.19536  | 0.031394  | 0.212544  | -0.41143  | 0.033543  | 0.074798  |
| -0.11731  | 0.131053  | 0.405509  | -0.23214  | -0.1228   | -0.23689  | -0.48915  | 0.198098  | -0.19713  |
| -0.00687  | 0.136521  | -0.1272   | 0.317504  | -0.04058  | 0.462498  | 0.086891  | -0.21673  | -0.02998  |
| -0.12131  | -0.05176  | 0.296957  | 0.42727   | -0.19444  | -0.14835  | -0.05045  | -0.37577  | -0.20523  |
| -0.18126  | -0.58474  | 0.137633  | 0.251133  | -0.49591  | -0.18832  | -0.03946  | -0.38856  | -0.46205  |
| 0.070661  | 0.199154  | -0.13722  | -0.23324  | -0.43531  | -0.12401  | -0.13093  | 0.092517  | -0.35266  |
| 0.152909  | 0.227665  | 0.555103  | 0.446054  | -0.06285  | -0.32388  | 0.055717  | 0.133783  | -0.25686  |
| -0.30871  | -0.26511  | 0.112281  | -0.02405  | -0.09862  | 0.249826  | 0.061707  | 0.211968  | -0.20055  |
| -0.2471   | 0.251727  | 0.336554  | -0.30783  | 0.48833   | -0.23886  | 0.294024  | -0.08308  | 0.311672  |
| -0.22935  | -0.18481  | -0.24679  | 0.125288  | -0.08762  | 0.028808  | -0.15985  | -0.12359  | 0.06822   |
| 0.274077  | -0.3108   | -0.09746  | -0.05321  | 0.468934  | 0.545919  | -0.1271   | -0.2777   | 0.49617   |
| 0.282579  | 0.473868  | -0.50258  | -0.51394  | 0.434844  | -0.24353  | 0.219494  | 0.51008   | -0.06976  |
| 0.080107  | 0.320974  | 0.162706  | 0.236364  | 0.280326  | 0.333646  | 0.245962  | 0.130518  | 0.320917  |
| 0.441248  | -0.00274  | -0.08282  | 0.450957  | 0.427072  | 0.456962  | -0.21729  | -0.31799  | 0.254508  |
| 0.39972   | 0.284628  | 0.144685  | -0.242    | 0.013272  | -0.06509  | -0.00724  | 0.565159  | -0.0045   |
| -0.20886  | 0.403391  | 0.670023  | -0.1489   | 0.461202  | 0.535609  | 0.179475  | 0.188081  | 0.212007  |
| -0.02076  | 0.189102  | 0.699822  | -0.06484  | 0.307258  | 0.444211  | 0.143393  | 0.53049   | 0.450889  |
| 0.27203   | 0.165858  | -0.25557  | -0.04333  | -0.03621  | -0.04301  | 0.234072  | 0.331548  | -0.02052  |
| 0.249101  | 0.152939  | -0.30332  | -0.26144  | -0.05116  | -0.17695  | 0.359664  | 0.349483  | -0.07815  |
| 0.188708  | 0.133537  | -0.26233  | -0.07438  | 0.073422  | -0.01326  | 0.273755  | 0.368377  | -0.02538  |
| 0.155995  | -0.01225  | -0.06049  | 0.415741  | 0.332877  | -0.07462  | 0.077782  | 0.035313  | 0.107285  |
| -0.08796  | -0.43159  | 0.487239  | 0.521926  | 0.121655  | -0.033    | -0.39603  | -0.20727  | -0.269    |
| -0.19191  | -0.49741  | -0.30222  | 0.190224  | 0.334358  | 0.059369  | 0.372889  | -0.31639  | 0.110792  |
| 0.321886  | 0.270926  | 0.304282  | 0.437182  | -0.01653  | 0.262056  | -0.18307  | -0.35433  | -0.12981  |
| 0.041932  | -0.38284  | -0.01721  | 0.238883  | 0.262707  | -0.06402  | 0.065656  | -0.24448  | -0.0117   |
| -0.0112   | 0.015883  | -0.02461  | 0.134121  | 0.488861  | -0.02148  | 0.113728  | -0.17759  | 0.205159  |
| 0.614555  | 0.469271  | 0.159967  | 0.613444  | 0.14108   | 0.298236  | -0.13929  | -0.30618  | -0.04369  |
| 0.384366  | 0.196878  | -0.03129  | 0.642023  | 0.561281  | 0.486945  | -0.22724  | -0.21116  | 0.112847  |
| -0.22794  | -0.38982  | -0.14384  | 0.313122  | 0.255589  | -0.04668  | 0.193463  | 0.498436  | -0.44652  |
| 0.39989   | 0.12352   | 0.058062  | 0.464307  | 0.524462  | 0.447523  | -0.15598  | 0.112469  | 0.460224  |
| 0.398671  | 0.313445  | 0.082116  | 0.361025  | 0.122261  | 0.154114  | 0.005183  | 0.068347  | 0.223681  |
| -0.44412  | -0.28423  | 0.179908  | 0.316532  | -0.30203  | 0.024757  | -0.33954  | -0.52121  | -0.06757  |
| -0.08415  | -0.27851  | -0.07929  | 0.022131  | -0.16643  | 0.142408  | -0.1545   | -0.27462  | -0.18815  |
| -0.07493  | -0.41113  | -0.02984  | 0.100893  | -0.4385   | 0.107204  | -0.20024  | -0.31293  | -0.16419  |

|          |          |          |          |          |          |          |           |           |
|----------|----------|----------|----------|----------|----------|----------|-----------|-----------|
| 0.35989  | -0.2419  | -0.1201  | 0.186972 | -0.05758 | 0.192132 | -0.1502  | 0.005698  | -5.44E-05 |
| 0.134956 | -0.26799 | -0.10368 | 0.181029 | 0.4285   | 0.490706 | 0.193407 | -0.20101  | -0.34682  |
| 0.353838 | -0.0443  | -0.12486 | 0.266325 | 0.063084 | -0.17765 | -0.20577 | -0.07049  | 0.035718  |
| -0.07252 | -0.18303 | 0.043644 | 0.621226 | 0.483497 | 0.443939 | -0.32661 | -0.43972  | -0.20186  |
| -0.07774 | -0.17504 | 0.155688 | 0.403839 | 0.253956 | -0.32747 | -0.37336 | -0.13638  | 0.101354  |
| 0.102794 | -0.14232 | -0.20979 | 0.366282 | 0.057233 | 0.298422 | -0.04386 | -0.22654  | -0.11404  |
| 0.25661  | -0.04285 | -0.22916 | 0.190671 | 0.088053 | 0.291635 | 0.218449 | -0.2476   | -0.11359  |
| 0.111352 | -0.00804 | -0.36771 | 0.159335 | 0.201223 | 0.323918 | 0.214356 | -0.33724  | -0.01424  |
| 0.025482 | -0.21337 | -0.32973 | 0.172339 | 0.32895  | 0.217871 | 0.273864 | -0.32393  | 0.12844   |
| -0.04375 | -0.15358 | 0.149804 | 0.20076  | 0.339442 | 0.453348 | 0.003384 | 0.141707  | -0.02766  |
| 0.320838 | 0.218282 | 0.016952 | 0.600323 | 0.387876 | 0.25742  | -0.03014 | -0.33127  | 0.099271  |
| -0.02647 | 0.231772 | -0.43791 | -0.13288 | 0.637704 | 0.211976 | 0.481877 | 0.169724  | 0.593228  |
| -0.08952 | -0.23586 | -0.13332 | 0.114585 | 0.237023 | 0.314305 | -0.09027 | -0.43182  | -0.24721  |
| 0.191501 | -0.25969 | 0.159885 | 0.4262   | 0.219194 | 0.389084 | -0.01096 | -0.19461  | 0.156144  |
| 0.238952 | 0.289391 | -0.0071  | 0.34442  | 0.316995 | 0.058627 | 0.036005 | -0.07619  | -0.05176  |
| -0.17857 | -0.01315 | 0.094287 | 0.075572 | -0.06865 | 0.234599 | -0.15893 | -4.65E-05 | -0.2234   |
| -0.42536 | -0.07419 | -0.47512 | -0.63927 | 0.051192 | 0.17118  | 0.369852 | 0.08583   | 0.09816   |
| -0.20202 | -0.144   | -0.32695 | -0.32477 | -0.09883 | -0.05556 | -0.10946 | -0.26981  | 0.01972   |
| 0.16148  | 0.07204  | 0.019283 | 0.167154 | 0.333548 | -0.35455 | 0.106203 | 0.234121  | 0.243734  |
| -0.19399 | -0.30624 | 0.015418 | 0.372878 | 0.215509 | 0.303233 | -0.21007 | -0.17276  | -0.20005  |
| -0.14892 | -0.5448  | 0.326481 | -0.04379 | -0.2528  | 0.21324  | -0.24192 | -0.38768  | -0.56309  |
| 0.024302 | -0.10722 | -0.23423 | 0.611257 | 0.410566 | 0.447043 | -0.36379 | -0.15777  | -0.08785  |
| -0.15999 | -0.13155 | -0.17555 | 0.527703 | 0.251026 | 0.423359 | -0.30258 | -0.32679  | -0.07195  |
| -0.11932 | -0.3912  | 0.10312  | 0.119938 | -0.25144 | 0.161626 | 0.020109 | -0.24466  | -0.29167  |
| -0.1986  | -0.40556 | -0.09105 | 0.131656 | -0.48024 | 0.300866 | -0.51244 | 0.209241  | -0.44617  |
| 0.54741  | 0.284318 | -0.08944 | 0.567632 | 0.147822 | 0.087833 | 0.217872 | -0.00885  | 0.218797  |
| 0.218606 | -0.19403 | 0.179257 | 0.341068 | -0.30399 | 0.33366  | -0.01974 | -0.38291  | -0.08744  |
| -0.53157 | -0.47982 | -0.02162 | 0.583827 | 0.015585 | 0.241349 | -0.08327 | 0.630728  | -0.71544  |
| 0.394771 | 0.008387 | -0.17932 | 0.256326 | 0.054744 | 0.414996 | 0.44258  | -0.00208  | -0.14821  |
| -0.28928 | 0.289762 | 0.320667 | 0.365662 | 0.330578 | 0.483327 | 0.32989  | 0.295199  | 0.211502  |
| 0.487004 | 0.276791 | -0.03601 | 0.495857 | 0.166175 | 0.337064 | 0.182507 | -0.20417  | 0.20225   |
| 0.425539 | 0.300634 | -0.00896 | 0.483917 | 0.257452 | 0.358702 | 0.183035 | -0.22304  | 0.164773  |
| 0.39661  | -0.12153 | 0.062206 | 0.337558 | -0.01224 | 0.01425  | 0.099452 | -0.1711   | 0.164267  |
| 0.127327 | -0.10468 | -0.31321 | 0.111004 | -0.19863 | -0.32457 | -0.32559 | 0.141153  | -0.03684  |
| 0.087339 | -0.02283 | 0.11556  | 0.207398 | 0.253319 | 0.26593  | -0.1821  | -0.03478  | 0.220155  |
| -0.56361 | -0.43477 | -0.2573  | -0.554   | -0.60728 | 0.434571 | -0.70169 | -0.6458   | -0.6068   |
| -0.04881 | -0.15294 | 0.228551 | -0.08833 | -0.32209 | 0.064012 | -0.44372 | -0.32655  | -0.50344  |
| -0.28876 | -0.47815 | -0.01915 | -0.40021 | -0.57158 | 0.08522  | -0.27446 | -0.58533  | -0.50253  |
| -0.42124 | -0.60672 | 0.492615 | 0.404249 | -0.55518 | -0.08577 | -0.56098 | 0.029373  | -0.38978  |
| -0.23116 | -0.04045 | 0.309866 | -0.11343 | -0.32551 | 0.007415 | -0.35435 | -0.15819  | -0.21777  |
| -0.24376 | -0.32632 | 0.532627 | 0.091755 | -0.64067 | -0.26316 | -0.46576 | 0.373261  | 0.133084  |
| 0.107535 | -0.00397 | 0.139582 | 0.461624 | -0.51344 | 0.529377 | -0.57466 | -0.20121  | -0.59267  |
| 0.225048 | -0.09774 | 0.140173 | 0.259364 | 0.366727 | 0.22619  | -0.23917 | 0.202629  | 0.076086  |
| -0.42228 | -0.33986 | 0.219566 | 0.203082 | -0.25491 | -0.14484 | -0.19642 | -0.00423  | -0.02397  |
| -0.19019 | -0.26768 | 0.111121 | 0.159601 | -0.45826 | 0.006695 | -0.45413 | -0.02427  | -0.39522  |
| -0.10428 | -0.50887 | 0.536226 | 0.565709 | -0.48202 | -0.00842 | -0.60084 | 0.019326  | -0.53347  |
| -0.19552 | -0.5377  | 0.463934 | 0.330362 | -0.503   | -0.44639 | -0.27748 | -0.15076  | -0.44751  |
| 0.199249 | 0.151415 | 0.041609 | -0.10761 | 0.152114 | 0.152295 | 0.156031 | 0.32077   | -0.06924  |
| 0.328971 | 0.227766 | -0.0259  | 0.1526   | 0.276941 | -0.00658 | -0.07987 | 0.278189  | 0.079872  |
| 0.077025 | 0.097672 | 0.061883 | 0.085667 | 0.155224 | 0.15126  | 0.009642 | 0.29893   | 0.059417  |

|          |          |          |          |          |          |          |          |          |
|----------|----------|----------|----------|----------|----------|----------|----------|----------|
| 0.250368 | 0.296251 | 0.364323 | 0.049812 | 0.389134 | 0.40403  | 0.283588 | 0.336599 | 0.108793 |
| 0.253247 | 0.262506 | 0.407853 | 0.055752 | 0.399108 | 0.253186 | 0.150533 | 0.36262  | 0.227034 |
| 0.137572 | 0.050335 | 0.095279 | 0.178275 | 0.216028 | -0.28151 | 0.04819  | 0.330254 | 0.170387 |
| 0.009649 | -0.03738 | 0.064265 | -0.05032 | 0.277901 | 0.347073 | 0.235467 | 0.273362 | 0.161209 |
| 0.091364 | -0.17466 | 0.221693 | 0.157472 | -0.36677 | -0.3002  | -0.36868 | 0.299829 | -0.32865 |
| 0.153463 | 0.038113 | 0.110881 | 0.295432 | -0.05756 | -0.24718 | -0.37483 | 0.272597 | -0.15331 |
| 0.002456 | -0.02927 | -0.01772 | -0.10942 | -0.1589  | -0.04274 | 0.225431 | 0.254874 | 0.00052  |
| 0.162355 | 0.119136 | 0.16681  | 0.002968 | -0.31331 | -0.30078 | -0.34798 | -0.0462  | -0.22559 |
| 0.109805 | 0.069836 | 0.300304 | 0.44102  | -0.19318 | 0.153397 | 0.159572 | 0.08166  | 0.252968 |
| 0.194614 | 0.117787 | -0.05806 | -0.04172 | 0.073497 | -0.23199 | 0.022882 | 0.216154 | 0.2069   |
| -0.04362 | -0.15261 | 0.054746 | 0.369064 | 0.03542  | 0.292751 | 0.086458 | -0.28787 | 0.132269 |
| 0.052272 | 0.053748 | 0.042262 | 0.020771 | 0.122527 | 0.058813 | -0.23048 | 0.025155 | 0.099215 |
| 0.336406 | 0.126728 | 0.270875 | 0.259628 | 0.229391 | 0.146085 | 0.249377 | 0.339134 | 0.061337 |
| -0.01402 | 0.17732  | 0.044623 | 0.237696 | 0.30045  | 0.156422 | -0.03298 | 0.332832 | -0.01295 |
| 0.260948 | 0.255829 | -0.18681 | -0.21674 | -0.15204 | -0.18786 | -0.0022  | 0.303819 | -0.16228 |
| 0.395315 | 0.279167 | 0.102004 | 0.019922 | 0.417946 | -0.28614 | -0.00929 | 0.164023 | 0.104498 |
| -0.21372 | 0.165652 | -0.14352 | -0.35827 | 0.389611 | -0.44209 | 0.340039 | 0.38845  | 0.440174 |
| 0.053861 | 0.310256 | -0.21853 | -0.34423 | 0.058458 | -0.28082 | 0.26366  | 0.3308   | 0.312316 |
| 0.2138   | 0.43072  | -0.25622 | -0.21326 | 0.273492 | -0.04255 | 0.042625 | 0.345414 | -0.38563 |
| 0.323227 | 0.311015 | -0.02413 | -0.21624 | 0.153179 | -0.10354 | 0.182522 | 0.423569 | 0.017909 |
| 0.191912 | 0.107604 | 0.038415 | 0.06743  | 0.329346 | 0.057187 | 0.165777 | 0.35577  | -0.06177 |
| 0.315122 | 0.295958 | -0.07618 | -0.09439 | 0.283687 | -0.14107 | 0.033591 | 0.398035 | -0.03631 |
| 0.250972 | 0.126906 | -0.09053 | -0.19615 | 0.291145 | -0.15605 | 0.27267  | 0.432877 | -0.02392 |
| 0.244865 | 0.271853 | 0.488212 | -0.04473 | 0.393841 | 0.276194 | 0.257128 | 0.467868 | 0.260491 |
| 0.495971 | 0.406524 | -0.18034 | -0.17115 | 0.027953 | -0.41801 | 0.065809 | 0.373759 | -0.21769 |
| 0.358985 | 0.239256 | -0.26958 | -0.01613 | 0.056331 | -0.21563 | 0.065377 | 0.342507 | 0.047591 |
| 0.255881 | 0.080958 | -0.10878 | 0.05289  | 0.333475 | -0.01836 | -0.01148 | 0.321502 | 0.193238 |
| 0.35424  | 0.21235  | 0.102572 | 0.052875 | 0.443638 | 0.38603  | 0.397714 | 0.213626 | 0.411358 |
| 0.021985 | 0.248598 | 0.650395 | 0.299047 | 0.177043 | 0.043583 | 0.169945 | 0.319231 | 0.324277 |
| 0.199555 | 0.161507 | 0.48043  | 0.147468 | 0.418287 | 0.226042 | 0.058092 | 0.267462 | 0.011334 |
| 0.290035 | 0.308537 | 0.500695 | 0.361534 | 0.370142 | 0.196922 | 0.115814 | 0.42412  | -0.02393 |
| -0.04412 | 0.010698 | 0.38092  | 0.225321 | 0.09833  | 0.018745 | 0.168051 | 0.444645 | 0.093548 |
| -0.01038 | -0.11657 | 0.454513 | 0.203062 | 0.009393 | 0.273215 | 0.095977 | 0.17786  | -0.21362 |
| 0.260084 | 0.292809 | 0.386564 | -0.03116 | 0.409388 | 0.233812 | 0.229027 | 0.42728  | 0.206101 |
| 0.243557 | 0.227752 | 0.475083 | -0.15824 | 0.416798 | 0.453115 | 0.373794 | 0.352857 | 0.302299 |
| 0.288994 | 0.277965 | 0.434732 | 0.140634 | 0.203233 | 0.056664 | 0.183867 | 0.378389 | 0.184738 |
| 0.330278 | 0.251034 | 0.394304 | 0.03995  | 0.2795   | 0.063026 | -0.04669 | 0.495793 | -0.08927 |
| 0.411013 | 0.2064   | 0.398382 | -0.08164 | 0.369398 | -0.02133 | 0.038616 | 0.413257 | 0.140089 |
| 0.251816 | 0.139344 | 0.290894 | 0.158226 | 0.42857  | 0.063247 | -0.01996 | 0.324523 | -0.01159 |
| 0.131929 | 0.224003 | 0.234457 | -0.0849  | 0.378    | -0.10868 | -0.01821 | 0.358167 | 0.20277  |
| 0.352081 | 0.358951 | 0.252457 | -0.11012 | 0.352909 | -0.11948 | 0.253788 | 0.497062 | 0.196382 |
| 0.308242 | 0.305269 | 0.615827 | 0.240305 | 0.399314 | 0.525913 | 0.365746 | 0.31979  | 0.304502 |
| 0.259789 | 0.261659 | 0.158898 | 0.231297 | 0.048753 | -0.12348 | -0.11117 | 0.354346 | 0.088393 |
| 0.345947 | 0.27251  | 0.312075 | 0.066925 | 0.237821 | -0.0501  | -0.13651 | 0.334787 | 0.157505 |
| 0.195792 | 0.028269 | 0.041847 | 0.214804 | 0.368783 | 0.18745  | -0.0404  | 0.366468 | -0.0889  |
| 0.192542 | 0.224862 | 0.189692 | 0.1631   | 0.284234 | 0.064232 | 0.039011 | 0.028178 | 0.097947 |
| 0.296476 | 0.239143 | 0.069963 | -0.15551 | 0.235319 | -0.19218 | 0.045954 | 0.355209 | -0.02067 |
| 0.146472 | -0.01605 | 0.021872 | 0.03732  | 0.18963  | -0.073   | -0.22564 | 0.161781 | 0.165032 |
| 0.197553 | 0.212595 | 0.118816 | 0.29645  | 0.32691  | -0.0099  | 0.051258 | 0.309136 | 0.137719 |
| 0.060443 | -0.15201 | 0.020889 | 0.214901 | -0.0193  | -0.18005 | -0.24935 | 0.33269  | -0.04104 |

|          |          |          |          |          |          |          |          |          |
|----------|----------|----------|----------|----------|----------|----------|----------|----------|
| 0.1379   | 0.276203 | -0.0939  | -0.04319 | 0.257016 | -0.16277 | 0.086366 | 0.264429 | 0.28429  |
| 0.140232 | -0.07306 | 0.115517 | 0.131286 | 0.32768  | 0.083183 | -0.03405 | 0.261325 | 0.217137 |
| 0.318817 | 0.006081 | 0.184905 | -0.05037 | 0.25262  | -0.06354 | -0.06386 | 0.392448 | 0.157492 |
| 0.039717 | 0.243158 | 0.699048 | 0.222175 | 0.435846 | 0.427795 | 0.264208 | 0.407365 | 0.280905 |
| 0.233191 | -0.02862 | -0.03399 | 0.203557 | 0.614509 | 0.250772 | 0.158655 | 0.302833 | 0.324587 |
| 0.456568 | 0.284895 | -0.11542 | 0.101494 | 0.247431 | 0.094942 | 0.037352 | 0.250937 | 0.489705 |
| 0.183962 | 0.308098 | -0.10466 | 0.184113 | 0.193129 | -0.01199 | -0.06977 | -0.0063  | 0.282772 |
| -0.10972 | -0.19259 | 0.091479 | 0.357496 | -0.24379 | 0.034059 | -0.29936 | -0.28951 | -0.07553 |
| -0.35077 | -0.30664 | 0.159412 | 0.465849 | -0.31564 | 0.233987 | -0.36797 | -0.50929 | 0.010769 |
| 0.219287 | -0.12737 | 0.28935  | 0.064018 | -0.05899 | 0.162199 | 0.090453 | 0.249278 | -0.15588 |
| -0.22196 | -0.23851 | -0.02818 | 0.317379 | -0.24844 | -0.09441 | -0.32603 | -0.37631 | 0.021666 |
| 0.097752 | -0.09208 | 0.331498 | -0.06489 | 0.352192 | 0.232591 | -0.07424 | 0.168535 | 0.20929  |
| -0.03301 | 0.033923 | 0.072839 | -0.11273 | 0.134006 | -0.38727 | 0.029652 | 0.014772 | 0.111605 |
| 0.19244  | 0.250416 | 0.292665 | 0.034264 | 0.15157  | -0.13854 | 0.127013 | 0.245916 | -0.07664 |
| -0.01592 | 0.424328 | 0.684662 | -0.15882 | 0.551585 | 0.359915 | 0.33669  | 0.392167 | 0.078843 |
| 0.254142 | 0.251947 | 0.062204 | -0.12025 | 0.195898 | -0.14204 | 0.143412 | 0.366055 | 0.061081 |
| 0.392914 | 0.065796 | -0.05578 | -0.05308 | 0.076131 | 0.008085 | 0.03495  | 0.395543 | -0.22933 |
| 0.390552 | 0.215805 | 0.179707 | 0.137665 | 0.356354 | -0.13719 | -0.26178 | 0.260962 | 0.112756 |
| 0.425184 | 0.204175 | 0.026218 | -0.00315 | 0.186765 | -0.22304 | 0.086431 | 0.373096 | -0.09108 |
| 0.354702 | 0.104314 | 0.051707 | -0.12304 | 0.287169 | -0.1348  | -0.01018 | 0.378238 | 0.202209 |
| 0.254147 | 0.261963 | 0.152699 | -0.05348 | 0.327429 | -0.14854 | -0.14583 | 0.403712 | -0.04288 |
| 0.405599 | 0.207263 | 0.030035 | -0.05002 | 0.305498 | -0.15679 | -0.11112 | 0.343762 | 0.069806 |
| 0.361786 | 0.195938 | 0.229278 | -0.23256 | 0.203658 | -0.31009 | -0.15901 | 0.418981 | -0.04429 |
| -0.09921 | 0.372351 | -0.30984 | -0.40257 | 0.152166 | -0.25555 | 0.38225  | 0.285639 | 0.324718 |
| 0.301356 | 0.237963 | -0.03419 | -0.24579 | 0.285157 | 0.105739 | 0.116854 | 0.353618 | -0.11775 |
| 0.256413 | 0.022902 | 0.100704 | -0.18903 | 0.161683 | 0.021675 | -0.00031 | 0.350186 | -0.10107 |
| 0.417431 | 0.213307 | 0.087881 | -0.17408 | 0.189395 | -0.08183 | -0.01658 | 0.462671 | 0.054611 |
| 0.221281 | 0.101126 | 0.134574 | -0.36308 | 0.490737 | -0.09751 | 0.140213 | 0.377812 | 0.278261 |
| 0.281644 | 0.111899 | 0.208451 | -0.04833 | 0.316353 | -0.23346 | 0.194396 | 0.47228  | 0.026964 |
| 0.361879 | 0.042512 | 0.23057  | 0.028421 | 0.418087 | -0.16579 | 0.001152 | 0.346018 | 0.163413 |
| -0.09778 | 0.440398 | 0.77236  | 0.127734 | 0.499636 | 0.611377 | 0.239016 | 0.342043 | 0.257983 |
| 0.022096 | 0.335365 | 0.764273 | 0.377789 | 0.40012  | 0.514331 | 0.378661 | 0.439515 | 0.381903 |
| 0.043189 | 0.340154 | 0.813331 | 0.327978 | 0.479808 | 0.520538 | 0.421867 | 0.469548 | 0.410091 |
| 0.060415 | 0.33499  | 0.730796 | 0.423074 | 0.421307 | 0.48277  | 0.30615  | 0.388481 | 0.322441 |
| 0.118597 | 0.31254  | 0.443462 | -0.00466 | 0.197974 | 0.145677 | 0.255835 | 0.375063 | 0.185071 |



| TCGA-HZ-A | TCGA-HZ-A | TCGA-IB-7 | TCGA-IB-7 | TCGA-IB-7 | TCGA-IB-7 | TCGA-IB-7 | TCGA-IB-7 | TCGA-IB-7 |
|-----------|-----------|-----------|-----------|-----------|-----------|-----------|-----------|-----------|
| 0.268139  | -0.18583  | 0.20818   | 0.081208  | 0.187348  | 0.244039  | 0.388159  | -0.11062  | 0.317584  |
| 0.055832  | -0.04729  | -0.06121  | -0.15635  | 0.413269  | 0.539272  | 0.193526  | 0.202108  | -0.2491   |
| -0.05247  | 0.0363    | 0.337168  | 0.137692  | 0.296497  | -0.18198  | 0.332377  | 0.351201  | 0.296126  |
| -0.17006  | -0.06641  | -0.22103  | -0.0392   | 0.136259  | 0.184496  | 0.386619  | -0.27687  | 0.245997  |
| -0.00943  | -0.31596  | -0.3935   | -0.18836  | 0.044238  | 0.062511  | 0.479154  | -0.20706  | 0.028165  |
| 0.1229    | -0.19655  | -0.05495  | -0.29711  | -0.02963  | -0.07266  | 0.169111  | -0.12533  | -0.20139  |
| 0.451089  | 0.177594  | 0.026894  | 0.166183  | -0.18338  | 0.136676  | 0.229414  | 0.106248  | 0.544686  |
| 0.045157  | 0.173026  | -0.16319  | -0.3088   | -0.20882  | -0.27382  | 0.037636  | -0.17285  | -0.04842  |
| -0.1339   | 0.05952   | 0.207719  | -0.25797  | 0.021292  | -0.14502  | 0.160977  | 0.057948  | 0.381895  |
| -0.06899  | -0.09304  | 0.004311  | -0.35127  | 0.143882  | -0.18925  | -0.02532  | -0.2379   | 0.238833  |
| 0.132173  | 0.122323  | 0.265799  | -0.33393  | -0.06136  | -0.29912  | 0.027258  | -0.02829  | 0.278233  |
| 0.24251   | 0.047049  | 0.102225  | -0.37043  | -0.21964  | -0.14816  | 0.059452  | -0.26124  | 0.166134  |
| 0.042102  | -0.20052  | 0.270045  | -0.04084  | 0.171185  | 0.252594  | 0.300744  | 0.185393  | 0.112012  |
| -0.08172  | -0.12656  | 0.090861  | 0.097977  | -0.12639  | -0.19514  | 0.421714  | -0.15077  | -0.06724  |
| -0.42135  | -0.5462   | -0.37725  | 0.034308  | 0.14141   | -0.0075   | 0.542876  | 0.226208  | -0.25402  |
| -0.00535  | -0.50026  | -0.12682  | 0.023699  | 0.247626  | 0.296835  | 0.527452  | -0.04746  | 0.110807  |
| 0.323584  | 0.180541  | 0.093526  | 0.185887  | 0.251518  | 0.394808  | 0.263978  | 0.112384  | -0.05955  |
| -0.10306  | -0.14729  | -0.18903  | 0.02801   | 0.286943  | -0.06615  | 0.174322  | 0.026769  | -0.00082  |
| 0.209344  | -0.18735  | 0.234436  | -0.12117  | 0.080423  | 0.244687  | 0.055879  | 0.023693  | -0.31932  |
| 0.663854  | 0.48661   | 0.465168  | 0.092421  | -0.43414  | 0.326305  | 0.395736  | 0.307391  | 0.308825  |
| 0.022109  | 0.186738  | 0.176018  | 0.250057  | -0.04348  | 0.023903  | -0.07536  | 0.258947  | 0.090915  |
| 0.109861  | 0.015423  | 0.176542  | 0.03584   | 0.163983  | 0.396232  | -0.30147  | 0.407802  | 0.316678  |
| -0.16732  | 0.399722  | -0.23061  | 0.162394  | -0.11574  | 0.091697  | -0.03409  | -0.00458  | -0.21563  |
| -0.16693  | -0.17747  | -0.256    | -0.11406  | 0.335614  | 0.359083  | 0.359645  | -0.27166  | -0.14431  |
| 0.101988  | 0.063538  | -0.02967  | -0.04651  | 0.082844  | -0.18275  | -0.09627  | -0.20611  | -0.22255  |
| -0.41196  | -0.31789  | -0.0535   | 0.020898  | 0.418674  | 0.017279  | 0.202019  | 0.018236  | -0.33571  |
| -0.36013  | 0.247346  | -0.11953  | 0.050041  | -0.4664   | -0.22313  | -0.18669  | -0.05575  | -0.39972  |
| -0.18904  | 0.241153  | -0.15467  | -0.32211  | 0.029398  | -0.29291  | 0.066549  | -0.09504  | -0.17626  |
| 0.22651   | -0.12749  | 0.218086  | -0.27087  | 0.568784  | -0.02573  | -0.27329  | 0.038609  | -0.62114  |
| -0.19265  | -0.0263   | -0.01312  | 0.129585  | 0.071375  | 0.215584  | 0.408449  | -0.01002  | -0.22958  |
| 0.12502   | -0.45052  | -0.2129   | 0.408516  | 0.476898  | 0.540648  | 0.372449  | 0.381647  | 0.269954  |
| -0.01432  | -0.33257  | -0.30089  | 0.000954  | 0.279182  | 0.353461  | 0.33679   | 0.113786  | 0.087171  |
| -0.23223  | 0.054839  | -0.13066  | 0.295564  | 0.03177   | 0.105914  | 0.355198  | 0.16464   | -0.08345  |
| -0.14181  | 0.093786  | 0.158841  | 0.284375  | 0.170872  | 0.174444  | 0.401488  | 0.176483  | -0.03773  |
| -0.15734  | -0.0517   | -0.14921  | 0.156657  | 0.096068  | 0.113549  | 0.333639  | 0.071706  | -0.16354  |
| 0.162383  | -0.19987  | 0.112419  | 0.042585  | 0.251751  | 0.189275  | 0.372445  | 0.026155  | -0.03318  |
| 0.351668  | -0.09758  | 0.014779  | 0.243008  | 0.11353   | 0.055142  | -0.05667  | 0.441739  | -0.31617  |
| 0.181575  | 0.040285  | 0.277133  | -0.35161  | -0.01262  | 0.223179  | 0.302961  | -0.28836  | 0.15009   |
| 0.318588  | 0.394619  | 0.488236  | -0.13435  | 0.177911  | -0.09462  | 0.064012  | 0.05904   | -0.04335  |
| 0.128064  | 0.168165  | 0.258814  | -0.07365  | 0.214136  | 0.43745   | 0.322194  | -0.18937  | 0.094053  |
| 0.189528  | -0.0726   | 0.09402   | -0.16231  | 0.212318  | 0.158721  | 0.231371  | -0.27791  | -0.19896  |
| 0.315899  | 0.305973  | 0.482855  | -0.02417  | 0.292838  | -0.39477  | -0.09545  | -0.06945  | 0.053814  |
| 0.347692  | 0.075386  | 0.170549  | -0.38089  | 0.489702  | -0.01298  | -0.00097  | -0.07197  | -0.22207  |
| 0.075462  | 0.564835  | -0.43752  | -0.25114  | -0.34458  | -0.06135  | 0.640168  | -0.32715  | -0.226    |
| -0.09941  | -0.24657  | 0.070184  | -0.10058  | 0.69985   | 0.073067  | -0.21002  | -0.28777  | 0.142798  |
| -0.03805  | 0.231111  | 0.27177   | -0.01829  | 0.315912  | -0.13096  | 0.010595  | -0.01936  | 0.291301  |
| 0.136672  | -0.03647  | -0.2207   | -0.17384  | 0.184963  | -0.19559  | -0.14919  | -0.42407  | -0.21804  |
| 0.235365  | -0.09507  | 0.017866  | 0.01358   | 0.024973  | 0.124448  | -0.00615  | 0.105726  | -0.09708  |
| 0.387593  | 0.062978  | 0.037796  | 0.166376  | -0.26058  | 0.030077  | 0.096711  | 0.078539  | -0.14559  |

|          |          |          |          |          |          |          |          |          |
|----------|----------|----------|----------|----------|----------|----------|----------|----------|
| 0.129044 | 0.260565 | 0.069358 | -0.0353  | -0.0045  | 0.033487 | -0.1242  | 0.06754  | 0.100554 |
| 0.322751 | 0.349007 | -0.34808 | -0.05764 | 0.323633 | 0.23606  | -0.28957 | -0.27385 | -0.21235 |
| 0.257429 | 0.230465 | 0.140485 | 0.012916 | 0.347115 | 0.28521  | -0.19213 | 0.237812 | 0.003826 |
| 0.415316 | 0.249525 | 0.241409 | -0.382   | 0.437281 | -0.01335 | -0.05115 | -0.08825 | -0.07517 |
| 0.357056 | 0.015622 | 0.20602  | -0.00594 | 0.217225 | 0.085795 | -0.06543 | 0.080623 | -0.15463 |
| 0.14681  | -0.16859 | -0.00988 | 0.148481 | 0.241942 | -0.05196 | -0.11381 | 0.145212 | -0.16521 |
| 0.294878 | -0.04094 | 0.061588 | -0.20692 | 0.178247 | -0.3255  | 0.206152 | 0.088576 | 0.265863 |
| 0.205281 | 0.043386 | -0.15361 | -0.34016 | 0.000268 | -0.24449 | 0.060246 | -0.35988 | 0.133763 |
| 0.054562 | 0.121427 | -0.02199 | -0.10647 | 0.022972 | -0.25585 | -0.08184 | -0.3314  | -0.17334 |
| 0.294678 | -0.14076 | -0.10251 | -0.19313 | 0.416109 | -0.01539 | 0.202188 | -0.07035 | -0.09099 |
| 0.256357 | 0.201817 | 0.085135 | -0.06536 | 0.497716 | 0.121282 | 0.314193 | 0.121631 | 0.207183 |
| -0.34186 | 0.184301 | -0.39411 | -0.58452 | 0.273021 | -0.20585 | -0.32521 | -0.46187 | -0.28399 |
| 0.293239 | 0.322324 | -0.04859 | -0.38546 | 0.260829 | -0.065   | -0.20949 | -0.10582 | 0.364801 |
| 0.120664 | -0.11305 | -0.10807 | -0.15109 | 0.422873 | -0.00769 | 0.292261 | -0.27576 | 0.225462 |
| 0.179454 | 0.071258 | 0.354656 | 0.02776  | 0.26805  | 0.078875 | 0.17723  | 0.14992  | 0.202665 |
| 0.112345 | 0.116023 | -0.01017 | 0.287134 | 0.143438 | 0.295931 | 0.323512 | 0.06366  | 0.193182 |
| 0.263945 | -0.42952 | -0.46991 | -0.15952 | -0.04757 | 0.034026 | 0.583874 | -0.27963 | 0.46427  |
| 0.17835  | -0.26023 | -0.19133 | -0.24877 | -0.02258 | -0.28455 | 0.433852 | 0.055035 | 0.315787 |
| -0.33731 | -0.19635 | 0.057734 | -0.24888 | 0.089266 | 0.053253 | -0.12594 | -0.12654 | -0.36057 |
| 0.419463 | 0.044789 | -0.0942  | -0.16778 | 0.112845 | -0.04355 | 0.181193 | 0.26295  | -0.20372 |
| 0.184888 | 0.371977 | -0.50674 | -0.32886 | -0.58342 | -0.05457 | -0.34881 | -0.20621 | -0.25936 |
| 0.434261 | 0.127264 | 0.165382 | -0.26042 | 0.577646 | 0.068927 | -0.05589 | 0.077419 | -0.11629 |
| 0.236554 | 0.135428 | 0.21734  | -0.17732 | 0.263342 | -0.12934 | 0.163086 | 0.023105 | -0.17789 |
| 0.348415 | 0.302989 | -0.248   | -0.03122 | -0.25229 | 0.070831 | -0.33139 | 0.203101 | -0.28024 |
| 0.230084 | -0.04661 | 0.154926 | 0.027736 | -0.08662 | -0.30246 | 0.315431 | 0.166603 | 0.097463 |
| -0.02711 | 0.116701 | 0.362831 | -0.1609  | 0.225775 | -0.23014 | 0.109344 | 0.054496 | 0.203233 |
| 0.350501 | 0.124868 | 0.321459 | -0.02138 | 0.020162 | 0.118447 | 0.175762 | -0.25756 | -0.00565 |
| 0.078485 | 0.667745 | -0.30813 | -0.36295 | -0.49269 | 0.224363 | 0.570776 | 0.012518 | 0.261816 |
| -0.08029 | 0.123822 | 0.303671 | -0.30069 | 0.351472 | 0.057158 | -0.20584 | 0.233971 | -0.25402 |
| -0.03372 | -0.30341 | -0.07612 | -0.16042 | 0.271507 | 0.142796 | 0.031499 | -0.04834 | 0.104843 |
| 0.017642 | 0.164214 | 0.304715 | -0.26531 | 0.352525 | -0.25006 | 0.120282 | -0.2133  | 0.211457 |
| 0.02901  | 0.060434 | 0.342572 | -0.25434 | 0.418983 | -0.2445  | 0.133251 | -0.16218 | 0.037728 |
| 0.300635 | 0.24276  | 0.216908 | -0.08801 | -0.06572 | -0.32182 | 0.142299 | -0.09866 | -0.22308 |
| 0.391612 | -0.05859 | 0.222837 | 0.085819 | 0.076441 | 0.222546 | 0.35611  | 0.128095 | -0.19483 |
| -0.07677 | -0.1522  | 0.16241  | -0.09063 | 0.013413 | 0.142139 | 0.239117 | -0.19814 | -0.09722 |
| 0.12396  | 0.700308 | 0.492648 | -0.62401 | 0.231008 | -0.51951 | -0.58107 | 0.637761 | 0.458497 |
| 0.176503 | 0.183559 | 0.017725 | 0.159818 | -0.10986 | 0.223613 | -0.31384 | 0.155223 | 0.02891  |
| 0.543631 | 0.225693 | -0.00669 | -0.08691 | -0.13854 | 0.202318 | -0.02372 | 0.107684 | 0.194694 |
| 0.630853 | 0.121748 | 0.059821 | 0.435311 | -0.16877 | 0.026911 | 0.421523 | 0.342369 | -0.11826 |
| 0.074793 | 0.375596 | -0.0642  | 0.189782 | -0.22369 | -0.24226 | -0.33135 | 0.296966 | 0.073186 |
| 0.698968 | -0.07081 | -0.48951 | 0.510574 | -0.16313 | 0.40754  | 0.300251 | -0.2139  | 0.140285 |
| 0.48867  | -0.34322 | -0.46521 | 0.482604 | 0.472758 | 0.409931 | 0.429458 | -0.06596 | 0.377105 |
| -0.09681 | -0.01752 | 0.108547 | -0.29513 | 0.291312 | 0.035259 | 0.105183 | -0.00496 | -0.05389 |
| 0.329084 | -0.22556 | 0.246218 | -0.13213 | -0.42815 | 0.001341 | -0.17441 | -0.01968 | -0.20954 |
| 0.284849 | 0.06228  | -0.02153 | 0.208946 | -0.03989 | 0.164589 | -0.09943 | 0.362745 | 0.192634 |
| 0.488215 | 0.113281 | 0.076804 | 0.452542 | 0.074499 | 0.286621 | 0.407845 | 0.516198 | 0.091269 |
| 0.451656 | 0.143561 | -0.09377 | 0.271457 | -0.43121 | 0.072498 | 0.394095 | 0.467354 | 0.111132 |
| -0.14979 | -0.06177 | -0.09431 | 0.034826 | 0.039006 | 0.034566 | 0.158824 | 0.100493 | -0.01998 |
| -0.12087 | -0.31104 | 0.010312 | 0.145118 | 0.199299 | 0.066898 | 0.12145  | 0.127443 | -0.19791 |
| -0.1149  | -0.21191 | 0.00451  | -0.21086 | 0.130006 | -0.06797 | 0.05318  | 0.131882 | -0.18246 |

|          |          |          |          |          |          |          |          |          |
|----------|----------|----------|----------|----------|----------|----------|----------|----------|
| -0.19049 | -0.31893 | -0.18575 | 0.100214 | 0.289682 | 0.038186 | 0.451996 | 0.123155 | 0.060736 |
| -0.27729 | -0.36816 | -0.09003 | -0.05772 | 0.337429 | 0.01505  | 0.386852 | 0.130541 | -0.18765 |
| -0.27246 | -0.21688 | -0.00666 | -0.30595 | -0.00522 | 0.125492 | -0.14053 | -0.1091  | -0.35017 |
| -0.16143 | -0.20008 | -0.14398 | -0.12501 | 0.245059 | -0.06148 | -0.03714 | -0.15816 | -0.1852  |
| 0.353422 | -0.04501 | 0.253116 | 0.417439 | -0.23429 | 0.101005 | 0.236257 | 0.16178  | -0.17712 |
| 0.058486 | -0.11969 | 0.109808 | 0.091648 | 0.048273 | 0.237374 | 0.253651 | 0.236498 | -0.23328 |
| 0.084109 | 0.027992 | 0.055967 | 0.274757 | -0.22845 | 0.071688 | 0.095428 | -0.02542 | -0.24913 |
| -0.04139 | -0.07139 | 0.065588 | 0.123382 | 0.156375 | 0.062048 | -0.03688 | 0.121251 | -0.03952 |
| -0.15185 | -0.09582 | -0.14796 | 0.101964 | 0.037182 | 0.038515 | -0.1002  | -0.24042 | 0.029161 |
| -0.15506 | -0.00208 | -0.03375 | -0.0329  | 0.118476 | 0.165704 | 0.207047 | 0.054958 | -0.19168 |
| 0.224951 | 0.05646  | 0.238857 | -0.33944 | 0.077491 | -0.06153 | -0.03825 | -0.14705 | 0.312026 |
| -0.21152 | -0.27994 | -0.20135 | -0.18132 | 0.002943 | 0.068269 | 0.184757 | -0.17088 | 0.151413 |
| -0.12371 | -0.02069 | 0.094418 | 0.111631 | 0.151922 | 0.134075 | 0.311187 | 0.037223 | -0.09507 |
| -0.24086 | -0.26567 | -0.08833 | -0.25838 | 0.193562 | -0.16158 | -0.05184 | 0.099709 | -0.2482  |
| -0.10558 | -0.16289 | 0.165744 | -0.04197 | 0.13402  | -0.02473 | 0.229552 | 0.143983 | -0.10397 |
| -0.23951 | -0.22998 | 0.101264 | 0.083343 | 0.428107 | 0.300513 | 0.247401 | 0.424834 | -0.19003 |
| -0.21581 | -0.16605 | -0.10477 | -0.31928 | -0.06881 | 0.032752 | 0.107612 | -0.15999 | -0.24019 |
| -0.10554 | -0.26415 | 0.010481 | -0.15941 | 0.101238 | 0.037205 | 0.146784 | 0.039418 | -0.01933 |
| -0.30175 | -0.34232 | -0.09427 | 0.239717 | 0.320726 | 0.222436 | 0.30948  | 0.268936 | 0.012716 |
| -0.21502 | -0.18641 | 0.00733  | 0.045024 | 0.111408 | -0.13508 | 0.360052 | 0.118795 | -0.01129 |
| -0.03984 | -0.08187 | 0.052588 | -0.15935 | 0.034938 | 0.043714 | 0.249956 | 0.020097 | 0.072742 |
| -0.16042 | -0.32434 | -0.06614 | 0.236266 | 0.2767   | 0.298997 | 0.36005  | 0.238232 | -0.11848 |
| -0.08217 | -0.28305 | 0.014208 | 0.361133 | 0.164795 | 0.312517 | 0.561255 | 0.048299 | 0.043553 |
| -0.24195 | -0.35448 | -0.25469 | 0.314447 | 0.425255 | 0.288895 | 0.501141 | -0.01277 | 0.017771 |
| -0.28547 | -0.03707 | 0.141506 | 0.252596 | 0.308262 | 0.237662 | 0.461526 | 0.375294 | -0.09994 |
| -0.06171 | 0.208819 | 0.117946 | 0.002758 | 0.162571 | -0.0181  | 0.225232 | 0.332744 | -0.13524 |
| 0.012371 | -0.07923 | 0.015056 | -0.13388 | 0.190768 | 0.051414 | 0.138804 | 0.093912 | -0.07549 |
| 0.03911  | -0.2725  | -0.38735 | 0.038298 | 0.448314 | 0.245686 | 0.010536 | 0.142637 | -0.1358  |
| 0.036767 | -0.23685 | -0.28069 | 0.532194 | 0.280883 | 0.594278 | 0.430306 | 0.405784 | 0.350224 |
| -0.17829 | -0.3635  | -0.0511  | 0.131236 | 0.205492 | 0.320834 | 0.326395 | 0.20528  | 0.036734 |
| -0.31082 | -0.17671 | -0.0934  | 0.349918 | 0.159678 | 0.163655 | 0.404852 | 0.34556  | 0.158508 |
| -0.2686  | -0.05986 | -0.04454 | 0.008781 | -0.17378 | 0.076118 | -0.03551 | 0.080661 | -0.1564  |
| 0.05516  | -0.19808 | -0.01069 | -0.09036 | -0.07934 | 0.109491 | -0.03031 | -0.01749 | -0.24693 |
| -0.30191 | -0.30748 | -0.05455 | 0.102278 | 0.208645 | 0.203485 | 0.242447 | 0.219202 | -0.12966 |
| -0.18293 | -0.37391 | -0.12467 | 0.272672 | 0.426061 | 0.33128  | 0.506748 | 0.162025 | 0.027539 |
| -0.24013 | -0.28551 | -0.13723 | 0.2402   | 0.313424 | 0.392779 | 0.422974 | 0.195738 | -0.08452 |
| -0.34934 | -0.24549 | 0.059682 | 0.063218 | 0.276115 | 0.137233 | 0.354894 | 0.238806 | -0.13237 |
| -0.33438 | -0.34499 | -0.01254 | 0.138085 | 0.296678 | 0.2206   | 0.383236 | 0.226191 | -0.24197 |
| -0.31198 | -0.33565 | -0.03423 | -0.08036 | 0.221358 | 0.186647 | 0.218906 | 0.216332 | 0.063998 |
| -0.33443 | -0.30693 | -0.11191 | -0.07859 | 0.153028 | 0.187055 | 0.282406 | 0.087129 | -0.12641 |
| -0.28223 | -0.19429 | -0.10733 | 0.101204 | 0.374883 | 0.099216 | 0.43415  | 0.169875 | -0.22621 |
| -0.16605 | -0.40522 | -0.25443 | 0.397001 | 0.371067 | 0.522622 | 0.467592 | 0.355513 | 0.35994  |
| -0.30039 | -0.09475 | 0.173899 | -0.06586 | 0.203576 | -0.02555 | 0.096255 | 0.329594 | -0.19697 |
| -0.30351 | -0.26719 | 0.083734 | -0.10677 | 0.227304 | 0.231492 | 0.243201 | 0.179225 | -0.16946 |
| -0.12106 | -0.09826 | -0.0165  | -0.1197  | 0.160967 | -0.23226 | 0.134604 | 0.192249 | -0.07312 |
| 0.052972 | -0.15765 | 0.131628 | 0.057995 | 0.199636 | 0.16338  | 0.125037 | 0.219066 | 0.183162 |
| -0.15063 | -0.22144 | -0.00944 | 0.100965 | 0.184566 | 0.185229 | 0.321881 | 0.171415 | -0.16709 |
| -0.19267 | -0.1414  | -0.12568 | -0.084   | 0.112305 | 0.17739  | 0.090724 | 0.022439 | -0.19881 |
| -0.25381 | -0.17217 | 0.018545 | -0.26433 | 0.021681 | 0.010101 | 0.019766 | 0.152529 | 0.038029 |
| 0.105518 | -0.1842  | 0.011823 | 0.174025 | 0.073625 | 0.240294 | 0.190272 | 0.089866 | -0.08648 |

|          |          |          |          |          |          |          |          |          |
|----------|----------|----------|----------|----------|----------|----------|----------|----------|
| -0.20815 | -0.23366 | 0.097655 | -0.14502 | 0.154052 | 0.041742 | 0.135792 | 0.113996 | -0.07291 |
| -0.31114 | -0.11654 | 3.83E-05 | -0.07194 | 0.100513 | 0.028386 | -0.07797 | 0.117244 | -0.12025 |
| -0.31587 | -0.37624 | 0.002549 | -0.1094  | 0.353893 | 0.233005 | -0.05153 | 0.05114  | -0.23529 |
| -0.16324 | -0.26642 | -0.33008 | 0.427549 | 0.295966 | 0.669704 | 0.411847 | 0.356669 | 0.292782 |
| 0.196241 | 0.16792  | -0.03642 | -0.50248 | 0.333828 | -0.3586  | -0.54931 | -0.27637 | -0.53598 |
| -0.15667 | -0.0332  | 0.107432 | 0.106235 | 0.429391 | 0.182086 | 0.10456  | 0.234081 | 0.000817 |
| -0.05851 | 0.127648 | 0.08514  | -0.15086 | 0.314009 | 0.059849 | -0.0509  | 0.085318 | -0.01068 |
| 0.108679 | -0.04099 | 0.09129  | -0.04927 | 0.151642 | -0.04387 | -0.01182 | -0.15221 | -0.21555 |
| 0.125889 | -0.00821 | -0.00461 | -0.15065 | 0.226918 | -0.162   | -0.21443 | -0.34156 | -0.21307 |
| 0.084697 | 0.200704 | 0.243069 | 0.127968 | 0.165476 | -0.00643 | 0.191098 | -0.00183 | 0.071728 |
| 0.143515 | 0.056932 | 0.047682 | -0.04536 | 0.047139 | -0.17542 | -0.17736 | -0.13405 | -0.18936 |
| -0.0422  | -0.24157 | -0.26581 | 0.155004 | 0.400138 | 0.286052 | 0.124129 | 0.198475 | -0.23572 |
| -0.14356 | -0.14815 | -0.21846 | 0.015333 | 0.083815 | 0.156814 | 0.413016 | -0.07323 | -0.09377 |
| -0.36488 | -0.31565 | -0.01655 | 0.079892 | 0.223566 | -0.00704 | 0.468096 | 0.06058  | 0.053307 |
| -0.2299  | -0.41083 | -0.20275 | 0.371053 | 0.359547 | 0.469911 | 0.425211 | 0.328421 | 0.186855 |
| -0.11237 | -0.15901 | 0.053548 | 0.140662 | 0.158511 | 0.190286 | 0.291306 | 0.113268 | -0.04557 |
| 0.004014 | -0.25856 | 0.162843 | 0.118624 | 0.250436 | 0.257507 | 0.340245 | 0.094339 | 0.003398 |
| -0.28729 | -0.32712 | 0.15505  | 0.06452  | 0.403921 | 0.157881 | 0.283726 | 0.170524 | 0.054477 |
| 0.038127 | -0.16909 | 0.021399 | 0.205526 | 0.21743  | 0.219485 | 0.31506  | 0.204999 | -0.05067 |
| -0.04941 | -0.26734 | 0.246378 | 0.076226 | 0.280394 | 0.265086 | 0.328595 | 0.151128 | -0.02637 |
| -0.08267 | -0.1336  | -0.02025 | 0.154561 | 0.191955 | 0.247791 | 0.159202 | 0.259626 | -0.15866 |
| -0.18053 | -0.15274 | 0.220079 | 0.250389 | 0.229613 | 0.227989 | 0.345646 | 0.261925 | -0.00285 |
| 0.006835 | 0.169151 | -0.0202  | 0.072273 | 0.075377 | -0.06609 | 0.394132 | 0.03874  | 0.081288 |
| -0.05865 | -0.36598 | 0.054173 | -0.21778 | 0.006874 | 0.089753 | 0.270388 | -0.1454  | 0.088781 |
| 0.036925 | -0.07379 | 0.01018  | 0.241394 | 0.155255 | 0.160772 | 0.266027 | 0.239857 | 0.0225   |
| 0.208918 | -0.10364 | -0.01712 | 0.108355 | -0.01717 | -0.17304 | 0.239974 | 0.12663  | -0.05205 |
| -0.1032  | -0.11724 | 0.10861  | 0.132134 | 0.158963 | 0.193668 | 0.159409 | 0.181191 | -0.21943 |
| -0.14583 | -0.37392 | 0.105216 | -0.05144 | 0.224035 | 0.11032  | 0.361016 | 0.139815 | -0.10375 |
| 0.006685 | -0.10117 | -0.00519 | 0.251461 | 0.108997 | 0.258703 | 0.251791 | 0.132486 | -0.1138  |
| -0.04525 | -0.04935 | -0.08855 | -0.01936 | 0.245509 | 0.272306 | 0.114803 | 0.099358 | -0.17295 |
| -0.08986 | -0.57079 | -0.2757  | 0.395319 | 0.473606 | 0.555343 | 0.533871 | 0.389457 | 0.426553 |
| -0.10393 | -0.41606 | -0.3151  | 0.412247 | 0.319768 | 0.65575  | 0.503114 | 0.351675 | 0.329389 |
| -0.13149 | -0.4503  | -0.42079 | 0.456367 | 0.330833 | 0.696789 | 0.567329 | 0.395188 | 0.333221 |
| -0.22247 | -0.47559 | -0.33023 | 0.562281 | 0.456442 | 0.785723 | 0.579886 | 0.450179 | 0.331039 |
| -0.19502 | -0.27861 | -0.02875 | 0.386006 | 0.309987 | 0.494012 | 0.487368 | 0.36975  | 0.253074 |

| TCGA-IB-7 | TCGA-IB-7 | TCGA-IB-8 | TCGA-IB-8 | TCGA-IB-A | TCGA-IB-A | TCGA-IB-A | TCGA-IB-A | TCGA-IB-A |
|-----------|-----------|-----------|-----------|-----------|-----------|-----------|-----------|-----------|
| 0.045312  | 0.128194  | 0.163366  | -0.31312  | -0.00195  | 0.086977  | 0.103815  | 0.130302  | -0.14466  |
| 0.018209  | 0.312362  | -0.13045  | 0.004875  | -0.31647  | 0.280194  | 0.035516  | -0.15381  | -0.16787  |
| -0.11856  | 0.264967  | -0.09906  | 0.224307  | 0.224324  | -0.01343  | 0.185061  | -0.11074  | -0.23417  |
| -0.11503  | 0.028311  | -0.36198  | -0.27916  | -0.44371  | 0.442263  | 0.580454  | -0.15003  | -0.41061  |
| -0.01412  | -0.10321  | -0.19984  | -0.3417   | 0.114417  | 0.598332  | 0.4164    | 0.108525  | -0.25944  |
| -0.1008   | -0.03215  | 0.079292  | -0.01321  | 0.451169  | -0.10564  | -0.21027  | -0.30505  | -0.2819   |
| 0.230282  | -0.22333  | -0.17274  | -0.44795  | 0.030328  | -0.11187  | -0.23203  | -0.24254  | -0.06186  |
| -0.0676   | -0.23471  | -0.13639  | -0.15774  | 0.30528   | -0.24473  | -0.2744   | 0.017687  | -0.01321  |
| 0.090438  | 0.017488  | 0.105763  | -0.08146  | 0.38117   | -0.28578  | -0.28665  | -0.06156  | -0.1433   |
| 0.04524   | -0.01624  | 0.08752   | -0.20718  | 0.305351  | -0.09159  | -0.344    | -0.26239  | -0.2598   |
| 0.043254  | -0.27287  | 0.097391  | -0.13127  | 0.376572  | -0.36878  | -0.46067  | -0.08491  | -0.15761  |
| -0.15181  | -0.12455  | 0.111284  | -0.24901  | 0.255353  | -0.37148  | -0.25559  | -0.14231  | -0.15989  |
| -0.11164  | 0.1414    | -0.28658  | 0.068414  | 0.358414  | 0.244443  | 0.1317    | -0.32192  | -0.25838  |
| 0.339678  | 0.031833  | -0.19874  | -0.29339  | 0.068841  | 0.316192  | -0.08728  | -0.04915  | 0.208609  |
| 0.217904  | 0.29814   | -0.21468  | -0.07533  | 0.063736  | 0.522837  | 0.400501  | -0.19859  | 0.060648  |
| 0.106231  | 0.296047  | -0.19441  | -0.37831  | -0.32301  | 0.522024  | 0.492097  | -0.36415  | -0.34294  |
| -0.0238   | 0.271262  | 0.071558  | 0.17423   | 0.162265  | 0.357363  | -0.02508  | -0.15043  | -0.33097  |
| 0.197096  | 0.063922  | 0.239862  | -0.0951   | 0.166011  | -0.12992  | 0.102995  | -0.22494  | -0.48721  |
| -0.15234  | 0.058943  | 0.24738   | -0.19643  | 0.312917  | -0.16822  | -0.17639  | -0.22472  | -0.1083   |
| 0.356269  | -0.10993  | -0.54617  | -0.20802  | 0.180874  | -0.44463  | -0.12972  | 0.002052  | -0.23401  |
| 0.001831  | -0.08952  | -0.14557  | 0.26882   | -0.21209  | -0.14689  | -0.15492  | 0.401644  | 0.192387  |
| -0.05859  | 0.254105  | -0.17198  | -0.04508  | 0.008098  | -0.31653  | -0.22276  | -0.16136  | 0.058765  |
| 0.17913   | -0.08079  | -0.02847  | -0.02245  | 0.129304  | -0.30888  | -0.03457  | 0.272323  | -0.10451  |
| 0.108253  | 0.259573  | -0.25514  | 0.048945  | -0.01706  | 0.436272  | 0.298012  | -0.3041   | -0.35357  |
| 0.147055  | -0.29487  | -0.12069  | -0.27111  | 0.224153  | 0.281277  | -0.22047  | 0.030406  | 0.025236  |
| -0.16743  | 0.307974  | 0.149441  | -0.33341  | -0.2914   | 0.336294  | 0.27763   | 0.208542  | -0.02159  |
| -0.57928  | -0.3084   | -0.08107  | 0.141175  | -0.48667  | -0.22932  | -0.15262  | 0.322821  | 0.670969  |
| -0.16235  | 0.077067  | 0.147487  | 0.201118  | -0.11645  | -0.14667  | -0.24887  | -0.09691  | 0.267114  |
| 0.274673  | 0.406833  | 0.646989  | -0.09458  | 0.415879  | -0.15322  | -0.23717  | 0.103184  | -0.08066  |
| -0.10017  | 0.278985  | -0.30785  | 0.350166  | -0.07719  | 0.146195  | 0.333993  | 0.000901  | -0.21719  |
| 0.435279  | 0.59393   | 0.376151  | 0.199645  | -0.40402  | 0.238855  | 0.090918  | -0.37516  | -0.45689  |
| 0.417182  | 0.362893  | 0.275709  | 0.233764  | -0.10389  | -0.00693  | -0.20861  | -0.37791  | -0.32675  |
| -0.15802  | 0.213114  | 0.065749  | 0.210052  | -0.31884  | 0.328086  | 0.267208  | -0.19515  | 0.183899  |
| -0.1761   | 0.244011  | -0.04515  | 0.29092   | -0.35512  | 0.335754  | 0.407652  | -0.28505  | 0.209784  |
| -0.16025  | 0.220956  | 0.075954  | 0.21885   | -0.3226   | 0.373277  | 0.223307  | -0.27952  | 0.153187  |
| 0.024009  | 0.184941  | -0.21659  | -0.0814   | 0.303529  | -0.14177  | 0.195218  | -0.02885  | -0.11311  |
| 0.416331  | 0.367453  | 0.354705  | -0.2609   | 0.629331  | 0.080668  | -0.18155  | -0.1718   | -0.47289  |
| -0.08299  | -0.09652  | -0.3553   | -0.31448  | 0.558145  | -0.3608   | 0.306728  | 0.029168  | -0.00642  |
| -0.13203  | 0.087534  | -0.00833  | 0.275637  | 0.497017  | -0.47311  | -0.00463  | 0.011364  | 0.017616  |
| -0.24402  | -0.17514  | -0.29135  | -0.31392  | 0.511569  | -0.13148  | 0.094216  | 0.07135   | -0.12671  |
| -0.01712  | 0.157069  | -0.41392  | -0.02606  | 0.299811  | 0.265558  | 0.410823  | 0.1656    | 0.005179  |
| -0.13556  | 0.139008  | 0.125375  | 0.346148  | 0.387019  | -0.50435  | -0.23962  | -0.08011  | -0.19988  |
| 0.26488   | 0.366201  | 0.456088  | -0.36933  | 0.316779  | -0.19825  | -0.38622  | -0.37696  | -0.4765   |
| 0.453112  | 0.30119   | -0.25122  | -0.12724  | 0.572434  | -0.27392  | -0.31305  | -0.2331   | -0.60276  |
| 0.219665  | 0.57772   | 0.518414  | -0.41832  | 0.133484  | -0.07308  | -0.46611  | -0.35965  | -0.55316  |
| 0.187045  | -0.00245  | -0.12324  | 0.145706  | 0.203594  | -0.3596   | -0.12415  | -0.05271  | 0.09565   |
| 0.277509  | -0.41906  | -0.30101  | -0.41701  | 0.50011   | 0.121689  | -0.38999  | 0.055996  | -0.46826  |
| 0.210072  | 0.049625  | -0.09942  | -0.16164  | 0.075655  | 0.126503  | 0.007664  | 0.003895  | -0.14081  |
| 0.189697  | -0.08433  | -0.35228  | -0.26099  | 0.251975  | 0.071165  | 0.105698  | 0.211688  | -0.16245  |

|          |          |          |          |          |          |          |          |          |
|----------|----------|----------|----------|----------|----------|----------|----------|----------|
| 0.010067 | 0.118046 | 0.101889 | -0.17509 | 0.268942 | -0.30199 | -0.03935 | -0.113   | -0.20039 |
| 0.423259 | 0.37519  | 0.645291 | -0.19954 | 0.126307 | -0.14505 | -0.09125 | -0.2684  | -0.3576  |
| 0.238856 | 0.410507 | 0.255396 | -0.00441 | -0.04596 | -0.13503 | 0.11019  | -0.28285 | -0.21506 |
| 0.334009 | 0.351138 | 0.51195  | -0.43091 | 0.468894 | -0.36808 | -0.54053 | -0.36275 | -0.46377 |
| -0.07725 | 0.272729 | 0.086522 | -0.14895 | 0.004405 | -0.33617 | -0.36129 | -0.17966 | -0.12337 |
| 0.315174 | 0.209512 | 0.073647 | -0.08486 | 0.260229 | -0.29234 | 0.092655 | -0.26192 | -0.38882 |
| 0.458558 | -0.00683 | 0.029567 | -0.2531  | 0.370568 | -0.43884 | -0.12893 | 0.010349 | -0.39977 |
| 0.230329 | -0.1374  | 0.049833 | -0.38779 | 0.073243 | -0.16111 | 0.096949 | 0.054138 | -0.20834 |
| 0.091643 | -0.12192 | 0.046007 | -0.3605  | 0.246173 | -0.24463 | 0.293749 | 0.181142 | -0.03937 |
| 0.404987 | 0.377529 | 0.220086 | -0.26029 | 0.090249 | 0.046409 | -0.26521 | -0.36196 | -0.49118 |
| 0.211748 | 0.52867  | 0.382424 | -0.36061 | -0.01607 | -0.19166 | -0.35165 | -0.30489 | -0.44528 |
| 0.063061 | 0.177927 | 0.460728 | -0.16793 | -0.16687 | -0.00655 | -0.51983 | -0.10346 | -0.21595 |
| 0.397691 | 0.304915 | 0.375555 | -0.15389 | 0.18534  | -0.32761 | -0.31557 | -0.06581 | -0.46458 |
| 0.175118 | 0.109168 | 0.084747 | -0.31396 | 0.317993 | -0.11188 | -0.32432 | -0.30184 | -0.44212 |
| -0.14749 | 0.313617 | 0.061032 | 0.290259 | 0.343439 | -0.17948 | 0.228427 | -0.08155 | 0.030624 |
| 0.150509 | 0.184935 | -0.27314 | -0.15115 | 0.261148 | -0.11104 | 0.222998 | 0.10201  | -0.27986 |
| -0.40082 | -0.07472 | -0.36729 | -0.10829 | -0.46287 | 0.568506 | 0.571607 | -0.20771 | -0.13513 |
| -0.23865 | 0.196822 | -0.2417  | -0.17302 | -0.28906 | 0.465951 | 0.395748 | -0.10258 | -0.20528 |
| -0.28697 | 0.077827 | 0.121351 | 0.227513 | 0.087217 | -0.16879 | -0.05235 | -0.3933  | -0.06326 |
| 0.263062 | 0.238742 | 0.153877 | -0.29996 | 0.419752 | -0.02327 | -0.32935 | -0.09375 | -0.43754 |
| 0.091749 | 0.130081 | -0.26943 | -0.40304 | 0.282586 | 0.50506  | -0.02593 | -0.03511 | 0.12987  |
| 0.396083 | 0.458773 | 0.555698 | -0.39474 | 0.30366  | -0.37832 | -0.51335 | -0.37585 | -0.54727 |
| 0.284194 | 0.205584 | 0.169155 | -0.24029 | 0.45289  | -0.32933 | -0.4626  | -0.36971 | -0.47204 |
| 0.244117 | 0.316489 | -0.31401 | -0.31881 | 0.078587 | -0.23018 | -0.10228 | -0.39877 | 0.149187 |
| 0.198062 | -0.22698 | -0.43865 | 0.015472 | 0.430855 | 0.365597 | -0.07606 | 0.263295 | -0.37138 |
| 0.021047 | -0.23468 | 0.175576 | 0.347914 | 0.422831 | -0.34424 | -0.16581 | -0.23135 | -0.03074 |
| 0.248738 | -0.11059 | -0.33713 | 0.148573 | 0.437548 | -0.17938 | 0.24039  | 0.241644 | -0.10735 |
| 0.247789 | 0.153341 | -0.45409 | -0.33905 | 0.451439 | -0.27707 | -0.43772 | -0.17673 | -0.62389 |
| -0.12256 | -0.06654 | 0.376077 | -0.05193 | 0.228524 | -0.46084 | -0.25149 | 0.303557 | 0.197871 |
| 0.013534 | 0.172379 | 0.116057 | 0.454699 | 0.047146 | -0.25615 | 0.113591 | 0.003736 | -0.41674 |
| 0.218162 | -0.09147 | 0.158174 | 0.060437 | 0.43237  | -0.43622 | -0.26727 | -0.16412 | -0.14126 |
| 0.280944 | -0.03539 | 0.307072 | 0.054894 | 0.415109 | -0.41925 | -0.28964 | -0.09365 | -0.21741 |
| 0.149389 | -0.29482 | -0.27348 | 0.142186 | 0.419257 | -0.2822  | 0.099592 | 0.012555 | 0.220732 |
| -0.00584 | 0.288346 | -0.32505 | -0.08706 | 0.489451 | 0.118744 | 0.304567 | -0.33932 | 0.194872 |
| -0.27838 | 0.14962  | 0.099973 | -0.07932 | 0.001587 | -0.05113 | -0.38317 | -0.2315  | -0.30392 |
| 0.719198 | -0.24239 | 0.322203 | -0.55129 | -0.18853 | 0.089829 | -0.52621 | 0.183237 | 0.458262 |
| 0.046124 | -0.12545 | -0.03957 | 0.006686 | -0.20861 | -0.26739 | -0.21564 | 0.330173 | 0.083238 |
| 0.431834 | -0.02423 | -0.32877 | -0.56618 | 0.022765 | 0.160397 | -0.06769 | 0.252058 | -0.28395 |
| 0.417563 | -0.1767  | -0.44912 | -0.38888 | 0.39583  | -0.01933 | 0.209873 | 0.344399 | 0.249096 |
| 0.13003  | -0.15503 | -0.18478 | -0.02481 | -0.35374 | -0.28217 | -0.40789 | 0.255588 | 0.226301 |
| 0.492423 | 0.333962 | -0.5103  | 0.083975 | 0.20888  | 0.322029 | 0.053789 | -0.15586 | -0.25582 |
| 0.623344 | 0.442665 | 0.635368 | -0.34001 | -0.583   | 0.069338 | -0.30356 | 0.377819 | -0.47303 |
| -0.16428 | 0.219875 | 0.281995 | 0.012272 | 0.40921  | 0.059169 | -0.0632  | -0.35057 | -0.46053 |
| 0.121797 | -0.44402 | -0.54594 | -0.07845 | 0.483517 | -0.45277 | -0.31016 | 0.352649 | 0.084241 |
| 0.22317  | -0.10774 | -0.19513 | -0.21318 | 0.090335 | -0.33903 | -0.04259 | 0.333194 | 0.215466 |
| 0.439108 | 0.134537 | -0.24379 | -0.34643 | 0.168031 | -0.07867 | 0.015341 | 0.349636 | 0.086513 |
| 0.128555 | -0.2414  | -0.50205 | -0.26615 | 0.222751 | -0.30566 | 0.289454 | 0.1089   | 0.167896 |
| -0.01498 | 0.174053 | 0.214681 | 0.106924 | -0.25971 | 0.143465 | 0.05865  | -0.13702 | 0.01802  |
| -0.08222 | 0.348841 | 0.353369 | 0.151209 | -0.11559 | 0.220188 | 0.090098 | -0.20805 | 0.086799 |
| 0.044376 | 0.227228 | 0.162101 | 0.010178 | 0.082653 | 0.256116 | 0.023526 | -0.27249 | -0.18552 |

|          |          |          |          |          |          |          |          |          |
|----------|----------|----------|----------|----------|----------|----------|----------|----------|
| 0.314415 | 0.381842 | 0.363099 | 0.054344 | -0.36157 | 0.257582 | 0.043843 | -0.37026 | -0.25651 |
| 0.256245 | 0.396508 | 0.314042 | 0.038461 | -0.1306  | 0.227163 | 0.147801 | -0.38775 | -0.29267 |
| -0.26979 | 0.052883 | -0.03734 | 0.26955  | 0.155997 | -0.06014 | -0.16894 | -0.3965  | -0.11505 |
| 0.088951 | 0.200046 | 0.306009 | -0.11209 | -0.19274 | 0.316193 | -0.00041 | -0.28803 | -0.18291 |
| -0.13411 | -0.02385 | -0.16086 | 0.003197 | -0.01884 | 0.205612 | 0.206701 | 0.125509 | 0.218645 |
| 0.028471 | 0.15206  | -0.13071 | 0.088389 | -0.01514 | 0.252034 | 0.055917 | -0.10832 | -0.10707 |
| -0.20944 | -0.13954 | -0.10691 | 0.299425 | -0.20965 | 0.13394  | 0.240177 | -0.0366  | 0.134191 |
| -0.10927 | 0.197032 | -0.018   | 0.009718 | -0.17305 | 0.047434 | -0.01846 | 0.141401 | -0.00278 |
| 0.06577  | 0.104168 | 0.395117 | -0.30074 | 0.187497 | -0.1175  | -0.18447 | 0.119218 | -0.15287 |
| -0.03014 | 0.147186 | -0.06222 | 0.116189 | 0.03969  | 0.123137 | 0.21059  | -0.11175 | 0.011405 |
| 0.200981 | 0.05707  | 0.196019 | -0.23374 | 0.525842 | -0.33448 | -0.32544 | -0.26777 | -0.20802 |
| -0.16523 | 0.118991 | 0.244213 | -0.21042 | -0.09949 | 0.1061   | -0.18209 | -0.12943 | 0.066945 |
| 0.076425 | 0.307435 | -0.01411 | 0.176305 | 0.069765 | 0.070434 | 0.119488 | -0.22603 | -0.12262 |
| -0.1687  | 0.237233 | 0.229296 | -0.05058 | -0.05018 | 0.216553 | -0.06001 | -0.34851 | -0.23596 |
| 0.041391 | 0.188537 | -0.01784 | 0.161149 | -0.19512 | 0.197666 | 0.24403  | -0.14205 | 0.127858 |
| -0.20239 | 0.47564  | 0.225128 | 0.231357 | -0.26426 | 0.254126 | 0.192862 | -0.47323 | 0.15702  |
| -0.27835 | -0.13169 | 0.12252  | 0.312695 | -0.32822 | 0.280348 | 0.321553 | 0.127715 | 0.357056 |
| -0.05526 | 0.23759  | -0.25881 | 0.235074 | -0.30042 | 0.179427 | 0.358379 | -0.2791  | 0.077633 |
| -0.09688 | 0.419463 | 0.296362 | 0.277092 | -0.4493  | 0.388943 | 0.254544 | -0.25046 | -0.12176 |
| -0.01885 | 0.084857 | -0.04854 | 0.158772 | -0.07383 | 0.198364 | 0.318569 | 0.085974 | 0.198416 |
| -0.06284 | 0.107828 | 0.101694 | 0.060539 | 0.010534 | -0.01866 | -0.01835 | -0.18008 | 0.005616 |
| -0.16202 | 0.372239 | 0.125268 | 0.209848 | -0.34889 | 0.359701 | 0.375366 | -0.14841 | 0.057715 |
| -0.41318 | 0.34551  | 0.026502 | 0.170217 | -0.49806 | 0.459928 | 0.500739 | -0.26158 | 0.068625 |
| 0.18827  | 0.470555 | 0.283104 | 0.100674 | -0.3652  | 0.398499 | 0.052281 | -0.50634 | -0.34023 |
| -0.00727 | 0.340174 | 0.042136 | 0.158277 | -0.32183 | 0.17526  | 0.266811 | -0.27199 | 0.075999 |
| -0.01154 | 0.284307 | -0.12933 | 0.057249 | 0.085533 | 0.11003  | 0.111196 | -0.16199 | 0.139521 |
| -0.17264 | 0.312429 | 0.101181 | -0.0274  | -0.16489 | 0.327532 | 0.165878 | -0.20765 | -0.20518 |
| 0.253718 | 0.384403 | 0.375589 | 0.237254 | -0.32535 | -0.0096  | 0.023818 | 0.192812 | -0.25888 |
| 0.108621 | 0.372242 | 0.113263 | 0.261303 | -0.13881 | -0.00968 | -0.00355 | -0.25576 | -0.17088 |
| 0.175849 | 0.450815 | 0.205458 | 0.209653 | -0.08744 | 0.172681 | 0.178861 | -0.3066  | -0.11538 |
| 0.084945 | 0.395082 | 0.277044 | 0.210023 | -0.29511 | 0.039814 | 0.103346 | -0.16796 | -0.20658 |
| -0.17468 | 0.262837 | -0.08306 | 0.294695 | -0.02995 | -0.03051 | -0.25164 | -0.1239  | -0.0226  |
| 0.16954  | 0.202421 | -0.05984 | -0.11485 | 0.101409 | -0.06139 | -0.083   | -0.19853 | -0.25756 |
| -0.02504 | 0.348789 | 0.36492  | 0.10455  | -0.28699 | 0.181249 | -0.14248 | -0.31571 | -0.15051 |
| 0.261381 | 0.429315 | 0.319756 | 0.251595 | -0.45225 | 0.287949 | 0.199932 | -0.35448 | -0.34977 |
| 0.22605  | 0.325024 | 0.25363  | 0.201165 | -0.06631 | 0.053862 | 0.189266 | -0.2696  | -0.0984  |
| 0.055913 | 0.398861 | 0.306029 | 0.335816 | -0.1504  | 0.18639  | 0.12713  | -0.30883 | -0.11552 |
| 0.226194 | 0.433056 | 0.205235 | 0.150605 | -0.03373 | 0.105881 | 0.216256 | -0.33463 | -0.17976 |
| 0.126947 | 0.358943 | 0.299776 | 0.09151  | 0.007292 | 0.036228 | -0.10597 | -0.32385 | -0.19886 |
| 0.071466 | 0.330635 | -0.04844 | 0.127822 | 0.054008 | 0.014555 | 0.149141 | -0.24739 | -0.2015  |
| 0.158716 | 0.382152 | 0.149931 | 0.156381 | -0.14595 | 0.296763 | 0.147047 | -0.34512 | -0.08096 |
| 0.406329 | 0.457443 | 0.382797 | 0.124948 | -0.16834 | 0.150045 | 0.0272   | -0.44026 | -0.41186 |
| -0.05771 | 0.234474 | 0.080198 | 0.105325 | 0.258761 | 0.205256 | -0.03363 | -0.22751 | -0.11393 |
| -0.05624 | 0.325896 | 0.091164 | 0.148618 | -0.15918 | 0.241127 | 0.177894 | -0.22757 | -0.12521 |
| -0.19476 | 0.223271 | 0.225665 | -0.10588 | 0.025148 | 0.206058 | -0.11095 | -0.20136 | -0.26039 |
| 0.07041  | 0.183575 | 0.230812 | 0.135045 | 0.143755 | 0.112775 | 0.185093 | 0.229528 | 0.172846 |
| -0.00711 | 0.320455 | 0.044817 | 0.252979 | -0.19092 | 0.234748 | 0.313948 | -0.21462 | -0.03939 |
| -0.16402 | 0.14828  | 0.115828 | -0.03102 | 0.082732 | 0.148798 | -0.13868 | -0.12455 | -0.03876 |
| -0.22653 | 0.108614 | 0.1548   | 0.008024 | 0.015093 | -0.057   | -0.20229 | -0.34234 | 0.001468 |
| -0.09314 | 0.157198 | 0.039635 | 0.020068 | -0.10127 | 0.302733 | 0.051854 | -0.05531 | -0.01963 |

|          |          |          |          |          |          |          |          |          |
|----------|----------|----------|----------|----------|----------|----------|----------|----------|
| -0.20778 | 0.154925 | 0.049695 | 0.016083 | -0.18345 | 0.291794 | 0.201766 | -0.30646 | 0.014662 |
| -0.23229 | 0.144107 | 0.19097  | 0.104979 | 0.094819 | 0.124296 | -0.08865 | -0.04333 | -0.0679  |
| -0.24828 | 0.3387   | 0.137762 | -0.09359 | 0.174215 | 0.224848 | -0.08316 | -0.19366 | -0.13458 |
| 0.40113  | 0.495126 | 0.38467  | 0.325827 | -0.15864 | 0.192127 | -0.14104 | -0.59419 | -0.34894 |
| -0.1587  | 0.39234  | 0.591879 | -0.37459 | 0.430769 | 0.221621 | -0.59681 | -0.10111 | -0.40518 |
| 0.199631 | 0.333447 | 0.316572 | 0.126954 | -0.07576 | 0.199932 | -0.07414 | -0.11088 | 0.051354 |
| 0.032522 | 0.34431  | 0.235661 | 0.345045 | 0.171224 | 0.195576 | 0.02092  | -0.33438 | -0.09889 |
| 0.189793 | -0.14149 | -0.07988 | -0.22946 | 0.367689 | 0.029239 | -0.16373 | -0.06551 | -0.40827 |
| 0.263587 | -0.37112 | -0.1164  | -0.38489 | 0.480399 | -0.06115 | -0.3528  | -0.02352 | -0.46062 |
| 0.136569 | 0.255611 | -0.07525 | 0.135779 | 0.248779 | 0.036949 | -0.16873 | -0.34888 | -0.15709 |
| 0.204238 | -0.22258 | -0.0946  | -0.17962 | 0.405585 | -0.03694 | -0.18839 | -0.01603 | -0.3195  |
| 0.04445  | 0.466614 | 0.317777 | 0.160877 | -0.37509 | 0.330161 | 0.304079 | -0.20858 | -0.37959 |
| 0.105949 | 0.227831 | -0.21756 | -0.10055 | 0.257177 | 0.396513 | 0.050447 | -0.04775 | -0.33917 |
| 0.248604 | 0.293381 | -0.07767 | 0.15404  | 0.162057 | 0.256828 | 0.041578 | -0.07424 | -0.20394 |
| 0.303635 | 0.555787 | 0.217688 | 0.384889 | -0.33638 | 0.308239 | 0.230981 | -0.46614 | -0.35697 |
| -0.09282 | 0.279906 | 0.052303 | 0.179292 | -0.25707 | 0.19024  | 0.249891 | -0.14669 | 0.067733 |
| 0.142674 | 0.326953 | 0.206489 | 0.001844 | -0.13655 | 0.272854 | 0.326748 | -0.14009 | -0.10938 |
| -0.15395 | 0.417062 | 0.282752 | 0.197673 | -0.16464 | 0.166892 | 0.000801 | 0.059491 | -0.02443 |
| 0.117474 | 0.302745 | 0.144164 | 0.07647  | -0.09826 | 0.178955 | 0.373766 | -0.05822 | 0.096908 |
| -0.03544 | 0.334027 | 0.261737 | 0.130897 | -0.13701 | 0.185298 | 0.287321 | -0.24022 | -0.1581  |
| 0.015825 | 0.414104 | 0.266871 | 0.100244 | -0.26556 | 0.364773 | 0.234327 | -0.27542 | 0.151434 |
| -0.11556 | 0.353933 | 0.299758 | 0.122646 | -0.24464 | 0.240694 | 0.233285 | -0.1674  | 0.089465 |
| -0.18023 | 0.359051 | 0.127318 | -0.01092 | -0.31213 | 0.211097 | 0.24675  | -0.30085 | 0.161257 |
| -0.11252 | 0.095693 | -0.31649 | 0.234116 | -0.3355  | 0.199895 | 0.479876 | -0.23286 | 0.243556 |
| 0.082471 | 0.329345 | 0.340268 | 0.105819 | -0.35489 | 0.347602 | 0.283769 | -0.25159 | -0.02537 |
| -0.00864 | 0.140028 | 0.359122 | 0.018347 | -0.30317 | 0.270616 | 0.173501 | -0.20528 | 0.241443 |
| -0.08308 | 0.324864 | 0.174221 | 0.132491 | -0.19386 | 0.309897 | 0.23847  | -0.22963 | 0.005823 |
| -0.09024 | 0.299066 | 0.24735  | 0.015402 | -0.20953 | 0.24955  | 0.24375  | -0.34952 | -0.15719 |
| -0.25243 | 0.273624 | -0.06485 | 0.312879 | -0.27511 | 0.254722 | 0.190241 | -0.24145 | 0.13427  |
| -0.04991 | 0.376534 | 0.316978 | -0.05772 | -0.08587 | 0.180639 | 0.096339 | -0.18743 | 0.04529  |
| 0.46722  | 0.609756 | 0.426647 | 0.015239 | -0.42331 | 0.403057 | -0.14962 | -0.53888 | -0.52219 |
| 0.260319 | 0.463464 | 0.360987 | 0.256017 | -0.16026 | 0.040643 | 0.093528 | -0.59369 | -0.40996 |
| 0.369178 | 0.560711 | 0.358079 | 0.287744 | -0.25835 | 0.171964 | -0.01921 | -0.64558 | -0.40575 |
| 0.352301 | 0.468044 | 0.499193 | 0.274368 | -0.29051 | -0.00038 | 0.035971 | -0.63505 | -0.39795 |
| 0.167123 | 0.356955 | 0.154219 | 0.255302 | -0.33297 | 0.168146 | 0.338847 | -0.49825 | -0.29904 |



| TCGA-IB-A | TCGA-IB-A | TCGA-IB-A | TCGA-IB-A | TCGA-IB-A | TCGA-L1-A | TCGA-LB-A | TCGA-LB-A | TCGA-M8- |
|-----------|-----------|-----------|-----------|-----------|-----------|-----------|-----------|----------|
| -0.08052  | 0.146275  | -0.252    | -0.29079  | 0.001979  | -0.07125  | 0.10129   | 0.465549  | -0.05271 |
| -0.39708  | -0.3058   | -0.56912  | 0.211441  | 0.262694  | -0.20509  | 0.597198  | 0.574689  | -0.10222 |
| -0.17498  | 0.080424  | -0.1634   | 0.361766  | 0.433749  | -0.03817  | -0.18114  | 0.042672  | 0.009857 |
| -0.42158  | -0.26187  | -0.32927  | 0.03756   | -0.38528  | -0.1276   | 0.070649  | 0.216028  | 0.319296 |
| -0.04519  | 0.031621  | -0.13473  | 0.054122  | -0.18718  | -0.0663   | 0.046178  | 0.304195  | 0.453543 |
| -0.14618  | 0.003419  | -0.05768  | 0.222182  | 0.129119  | -0.3571   | 0.023794  | -0.05444  | 0.259987 |
| 0.155687  | 0.042076  | 0.033554  | 0.003331  | -0.2854   | -0.09797  | 0.519091  | 0.178877  | 0.279928 |
| 0.03879   | -0.10207  | 0.094236  | 0.149528  | 0.068084  | -0.18633  | 0.076079  | -0.20894  | 0.240176 |
| -0.00272  | -0.2552   | -0.07947  | 0.090231  | 0.312049  | -0.04639  | 0.092589  | -0.16654  | -0.02385 |
| -0.00624  | -0.34979  | 0.059499  | 0.148232  | 0.383568  | -0.17806  | -0.17027  | 0.013929  | -0.31723 |
| 0.026304  | -0.21913  | 0.197001  | 0.309334  | 0.378878  | -0.22659  | -0.0282   | -0.13955  | -0.14774 |
| 0.049678  | -0.35868  | 0.01977   | 0.228065  | 0.343821  | 0.177195  | 0.261308  | -0.18561  | -0.00011 |
| -0.2314   | 0.036998  | -0.26192  | 0.178692  | 0.300563  | -0.49247  | 0.154993  | -0.03021  | 0.240543 |
| -0.06481  | 0.228844  | 0.093471  | -0.1033   | -0.1702   | -0.18952  | 0.005338  | 0.105718  | 0.308847 |
| -0.19295  | 0.198815  | -0.58234  | 0.059385  | -0.17496  | -0.20775  | -0.11083  | 0.473577  | -0.04053 |
| -0.26015  | 0.032829  | -0.15468  | -0.09969  | -0.07972  | -0.19271  | 0.187503  | 0.251875  | -0.08551 |
| -0.44437  | -0.15511  | -0.34112  | 0.144897  | -0.52628  | -0.01897  | 0.264836  | 0.253177  | 0.228811 |
| -0.04013  | -0.19232  | 0.02862   | 0.109562  | 0.147111  | 0.190194  | -0.05288  | 0.318258  | 0.059329 |
| -0.06652  | -0.61209  | 0.184486  | 0.016232  | 0.118094  | 0.004681  | 0.280226  | 0.363667  | -0.37281 |
| 0.503402  | 0.13105   | -0.28723  | -0.34492  | -0.0839   | -0.10121  | 0.391962  | 0.344099  | -0.39248 |
| 0.352235  | -0.04858  | -0.0247   | 0.181738  | -0.3945   | 0.20801   | -0.10372  | -0.33675  | 0.11402  |
| 0.035225  | 0.504023  | -0.3076   | 0.269513  | -0.22677  | -0.18511  | -0.3442   | -0.57163  | -0.16059 |
| 0.000811  | -0.26891  | 0.062305  | 0.101998  | -0.26839  | -0.34918  | 0.063053  | 0.137968  | 0.112231 |
| -0.3597   | -0.37117  | -0.40089  | 0.033456  | -0.09927  | -0.2876   | -0.03178  | 0.361742  | 0.272562 |
| 0.114754  | -0.05836  | 0.125179  | -0.00517  | -0.2446   | -0.11115  | -0.0878   | -0.06475  | -0.20961 |
| -0.17424  | -0.27258  | -0.18485  | -0.10641  | 0.480654  | 0.101425  | -0.11934  | 0.2781    | -0.27129 |
| -0.33864  | -0.07716  | -0.07784  | 0.173058  | -0.01194  | 0.141822  | -0.28719  | -0.44832  | 0.153959 |
| -0.00474  | -0.1406   | 0.253555  | -0.12111  | 0.252546  | 0.205408  | -0.28962  | -0.2514   | 0.08521  |
| 0.370238  | 0.033601  | 0.124394  | 0.307295  | 0.534008  | -0.29722  | 0.075322  | 0.350694  | -0.47175 |
| 0.049646  | 0.087859  | -0.13064  | 0.420591  | -0.14825  | 0.015269  | -0.27912  | -0.14395  | 0.373959 |
| -0.10754  | -0.11011  | 0.027678  | -0.03062  | 0.338818  | -0.35616  | -0.21689  | 0.431989  | -0.00387 |
| 0.483653  | -0.02347  | 0.078803  | -0.20226  | -0.02151  | -0.32795  | -0.15909  | -0.28621  | 0.214281 |
| -0.35094  | -0.06329  | -0.03899  | -0.12846  | -0.04751  | -0.11647  | -0.37152  | -0.15134  | 0.255523 |
| -0.23214  | 0.034616  | -0.07291  | -0.0971   | -0.12707  | 0.058813  | -0.40572  | -0.13242  | 0.300812 |
| -0.3878   | -0.04408  | 0.022378  | -0.1922   | 0.110545  | -0.17933  | -0.35174  | -0.10602  | 0.174517 |
| 0.215312  | -0.04287  | -0.05911  | 0.387094  | 0.009978  | 0.059281  | -0.25634  | 0.062065  | -0.0568  |
| 0.103859  | -0.38694  | -0.57014  | 0.033801  | 0.211545  | -0.07439  | 0.326368  | 0.436051  | -0.64231 |
| 0.488804  | -0.04321  | -0.18422  | 0.463331  | -0.11546  | 0.35897   | 0.007201  | 0.157618  | 0.116417 |
| 0.19625   | -0.33502  | -0.0644   | 0.471281  | 0.044679  | -0.28118  | -0.30855  | 0.133298  | -0.27926 |
| 0.07213   | -0.11743  | -0.236    | 0.322586  | -0.05107  | 0.005602  | -0.08817  | 0.124422  | 0.221445 |
| 0.111762  | 0.046974  | -0.1142   | 0.232769  | 0.028752  | 0.13527   | -0.15668  | -0.04239  | 0.297067 |
| -0.27904  | -0.19096  | 0.13562   | 0.37551   | 0.411364  | -0.48806  | -0.14902  | 0.113621  | -0.47667 |
| -0.04591  | -0.21933  | -0.50851  | 0.138609  | 0.611322  | -0.30119  | 0.205833  | 0.479237  | -0.50724 |
| 0.014256  | -0.39428  | -0.16629  | 0.079936  | 0.414334  | -0.27799  | 0.500686  | 0.346668  | 0.479972 |
| -0.34016  | -0.25073  | -0.52427  | -0.20401  | 0.58756   | -0.46574  | 0.272775  | 0.223323  | -0.62152 |
| 0.032378  | 0.011588  | 0.193168  | 0.3759    | 0.210914  | -0.32712  | 0.136435  | -0.12921  | -0.14713 |
| 0.340049  | -0.21468  | 0.160108  | -0.05508  | -0.25699  | -0.10979  | 0.09781   | 0.044477  | -0.356   |
| 0.058918  | 0.066918  | 0.001227  | -0.10157  | -0.05049  | 0.047932  | 0.14047   | 0.105685  | -0.34794 |
| 0.35292   | 0.145198  | 0.173506  | -0.03132  | -0.21022  | 0.168584  | 0.275811  | 0.022531  | -0.31997 |

|          |          |          |          |          |          |           |          |          |
|----------|----------|----------|----------|----------|----------|-----------|----------|----------|
| 0.495818 | 0.074105 | -0.07533 | 0.100006 | 0.147572 | -0.2275  | 0.110673  | 0.349682 | -0.31261 |
| -0.16324 | 0.140042 | -0.12246 | -0.31766 | 0.395563 | -0.10652 | 0.521821  | 0.596096 | -0.45538 |
| 0.138121 | 0.10905  | -0.10966 | 0.065358 | 0.032632 | 0.086974 | 0.147611  | 0.271451 | -0.15819 |
| 0.002568 | -0.40673 | -0.52907 | -0.17157 | 0.561048 | -0.23239 | 0.162314  | 0.576437 | -0.5024  |
| -0.02133 | -0.07791 | -0.40519 | -0.42195 | 0.276466 | -0.14516 | 0.155323  | 0.247439 | -0.30374 |
| 0.070185 | 0.135002 | -0.30831 | 0.187117 | 0.237884 | -0.25665 | 0.269871  | 0.103803 | -0.24958 |
| -0.20139 | 0.174803 | 0.001866 | 0.041599 | 0.238574 | -0.28515 | 0.154795  | 0.317152 | -0.28717 |
| 0.115976 | 0.202476 | 0.125042 | -0.0025  | 0.230768 | 0.102736 | 0.027545  | 0.191368 | -0.3575  |
| -0.00966 | 0.235877 | 0.173908 | 0.016987 | 0.373864 | 0.027311 | 0.121908  | 0.373764 | -0.26391 |
| -0.31773 | -0.09949 | -0.25154 | -0.02651 | 0.389605 | -0.47338 | 0.104025  | 0.340307 | -0.22882 |
| -0.38477 | -0.35223 | -0.37978 | -0.20239 | 0.519618 | -0.2471  | -2.28E-05 | 0.497381 | -0.44102 |
| -0.40152 | -0.29962 | -0.22274 | 0.354642 | 0.490233 | -0.32854 | 0.498729  | 0.246657 | -0.54684 |
| 0.135411 | -0.31212 | -0.27191 | 0.16729  | 0.330429 | 0.047041 | 0.100066  | 0.422928 | -0.42191 |
| -0.17748 | -0.19918 | -0.19401 | 0.285946 | 0.363365 | 0.009432 | 0.074864  | 0.201913 | -0.30149 |
| -0.09464 | -0.03053 | 0.008864 | 0.362255 | 0.030415 | 0.1272   | -0.25094  | 0.254307 | -0.20633 |
| -0.13961 | -0.3493  | -0.31885 | 0.232121 | -0.08268 | -0.04119 | 0.132788  | 0.348094 | 0.066203 |
| -0.35637 | -0.01228 | 0.111965 | -0.17571 | -0.46184 | 0.158041 | 0.161263  | -0.05017 | 0.388713 |
| -0.15918 | -0.23855 | -0.01601 | 0.019668 | -0.21307 | -0.0876  | 0.204364  | -0.10787 | 0.178761 |
| -0.08641 | -0.17425 | -0.18237 | 0.323017 | 0.247215 | -0.28505 | -0.26567  | 0.097009 | -0.03793 |
| 0.194755 | -0.24496 | -0.28474 | 0.09     | 0.261091 | 0.0171   | 0.204814  | 0.366324 | -0.35871 |
| 0.232744 | -0.1743  | 0.11833  | -0.25504 | -0.15174 | 0.048631 | 0.299415  | 0.152911 | -0.31078 |
| -0.07363 | -0.42901 | -0.52107 | 0.037405 | 0.509079 | -0.40576 | 0.209922  | 0.61335  | -0.47963 |
| 0.082787 | -0.53649 | -0.44645 | -0.08413 | 0.503645 | -0.35675 | 0.176046  | 0.315444 | -0.38658 |
| 0.200887 | 0.403514 | 0.135639 | 0.050343 | -0.28603 | 0.441564 | 0.169451  | 0.303038 | -0.6019  |
| 0.112246 | 0.487503 | 0.259039 | -0.22287 | -0.13288 | 0.035007 | 0.148685  | 0.176433 | -0.37668 |
| 0.03864  | -0.13764 | 0.03961  | 0.438799 | 0.319358 | -0.40686 | -0.2187   | -0.16353 | -0.30287 |
| 0.318067 | -0.31958 | 0.150426 | 0.37258  | -0.09447 | -0.2284  | 0.139244  | 0.294204 | -0.17519 |
| -0.30584 | -0.42699 | -0.54852 | 0.273239 | -0.01162 | 0.186662 | 0.593022  | 0.172327 | 0.021217 |
| 0.304407 | 0.392374 | -0.2665  | 0.182465 | 0.2383   | -0.36312 | 0.14956   | 0.120298 | -0.12271 |
| -0.39263 | -0.43547 | 0.203782 | 0.654191 | 0.363599 | 0.188015 | 0.014747  | 0.052878 | 0.016068 |
| -0.01193 | -0.24353 | 0.03684  | 0.479032 | 0.302078 | -0.41552 | -0.10858  | 0.053696 | -0.32089 |
| -0.1988  | -0.10804 | -0.03008 | 0.440317 | 0.342769 | -0.43408 | 0.019973  | 0.106572 | -0.3392  |
| 0.123205 | -0.01526 | 0.354576 | 0.397583 | -0.03188 | -0.2951  | 0.031449  | -0.08843 | -0.11333 |
| 0.308209 | -0.01194 | -0.12173 | 0.233026 | 0.085626 | 0.374131 | 0.328939  | -0.13029 | 0.050114 |
| -0.1154  | -0.1389  | -0.21354 | 0.313978 | 0.307797 | -0.21026 | -0.12952  | 0.081517 | 0.078793 |
| 0.707308 | -0.61807 | 0.213397 | -0.64268 | 0.151758 | -0.45707 | 0.380656  | 0.395066 | -0.7992  |
| 0.379074 | 0.399252 | 0.172504 | -0.09939 | -0.39486 | 0.26157  | -0.15772  | -0.40136 | -0.39974 |
| 0.501187 | -0.15017 | -0.34432 | -0.30902 | -0.2137  | -0.17272 | 0.410381  | 0.051115 | -0.52769 |
| 0.425537 | 0.530761 | 0.407151 | -0.42355 | -0.58994 | 0.453906 | 0.291539  | -0.34606 | -0.32749 |
| 0.448898 | 0.062236 | 0.325395 | -0.06518 | -0.18324 | 0.234645 | 0.062441  | -0.328   | -0.3998  |
| 0.404738 | 0.361206 | 0.482576 | 0.264558 | -0.62388 | -0.03773 | 0.082264  | -0.06944 | -0.16253 |
| -0.14236 | 0.094747 | -0.27912 | -0.43289 | 0.242695 | -0.14316 | 0.383363  | 0.706293 | -0.51084 |
| -0.04607 | -0.26355 | -0.38029 | 0.314297 | 0.377754 | -0.16147 | 0.086329  | 0.146901 | -0.22682 |
| 0.278457 | 0.135456 | 0.55755  | 0.05599  | -0.51949 | -0.13226 | 0.080479  | -0.26077 | -0.1746  |
| 0.353751 | 0.345342 | 0.113171 | -0.17069 | -0.37574 | 0.269913 | 0.192589  | -0.2797  | -0.29679 |
| 0.213084 | 0.359974 | 0.20022  | -0.458   | -0.39243 | 0.577022 | 0.151988  | -0.27458 | -0.39001 |
| 0.463037 | 0.045783 | 0.30993  | -0.19684 | -0.65934 | 0.503053 | 0.239982  | -0.57443 | 0.229605 |
| -0.1579  | -0.06317 | -0.03535 | 0.081407 | 0.127436 | -0.1284  | -0.2041   | -0.00743 | 0.086283 |
| 0.062254 | 0.107624 | -0.17455 | 0.046211 | 0.127503 | 0.072902 | -0.40176  | 0.092025 | 0.063244 |
| -0.25002 | 0.025651 | -0.20721 | 0.09814  | 0.177024 | -0.11338 | -0.28664  | -0.05239 | -0.13155 |

|          |          |          |          |          |          |          |          |          |
|----------|----------|----------|----------|----------|----------|----------|----------|----------|
| -0.12622 | -0.18856 | 0.104038 | 0.13131  | 0.249462 | -0.31399 | -0.21469 | 0.145739 | 0.163336 |
| -0.16817 | -0.26395 | -0.15631 | 0.083518 | 0.223186 | -0.26126 | -0.39923 | 0.159627 | 0.211362 |
| -0.18632 | -0.18268 | -0.12984 | 0.282224 | 0.158808 | -0.30127 | -0.2936  | -0.22239 | 0.000862 |
| -0.26426 | -0.05521 | -0.08941 | 0.03296  | 0.319763 | -0.19131 | 0.072645 | 0.227041 | -0.10487 |
| 0.339499 | 0.473833 | 0.187301 | -0.06492 | -0.3982  | 0.411643 | -0.25636 | -0.34068 | -0.08403 |
| -0.08637 | 0.312721 | -0.05285 | 0.199619 | -0.10551 | 0.239504 | -0.37397 | -0.26581 | -0.0404  |
| 0.303231 | 0.215622 | 0.402891 | 0.000284 | -0.2663  | 0.248193 | -0.14329 | -0.34338 | -0.01444 |
| -0.09611 | 0.296035 | -0.10188 | -0.09649 | -0.15274 | 0.115135 | -0.28537 | -0.13802 | -0.08045 |
| -0.33203 | 0.080995 | 0.249817 | 0.058894 | 0.226278 | -0.27554 | 0.145993 | 0.121396 | -0.15224 |
| 0.004969 | 0.141677 | -0.20101 | 0.15404  | 0.0407   | -0.1942  | -0.28089 | -0.08197 | 0.189825 |
| 0.246825 | -0.13533 | -0.37863 | 0.400781 | 0.216783 | -0.13797 | 0.189169 | 0.327623 | -0.31693 |
| -0.2318  | -0.08064 | -0.16166 | -0.14309 | 0.183058 | 0.159233 | -0.38393 | 0.098755 | 0.082542 |
| -0.1933  | -0.08018 | 0.048735 | 0.255628 | 0.235993 | -0.14692 | -0.35783 | -0.09998 | 0.35819  |
| -0.35854 | -0.17374 | -0.21833 | 0.005125 | 0.333938 | -0.21131 | -0.22692 | -0.06747 | -0.1469  |
| -0.03139 | 0.169078 | -0.11021 | -0.0136  | -0.02691 | -0.12639 | -0.19892 | -0.17817 | 0.01916  |
| -0.32301 | 0.163706 | -0.2322  | 0.006591 | 0.145804 | -0.12763 | -0.45945 | 0.026786 | 0.142797 |
| 0.018841 | -0.07566 | -0.01206 | 0.082112 | -0.11847 | 0.046974 | -0.00058 | 0.069484 | 0.24799  |
| -0.24621 | 0.080096 | 0.263423 | -0.05666 | 0.013422 | -0.36073 | -0.27239 | -0.17683 | 0.121819 |
| -0.28984 | -0.01294 | -0.17074 | -0.18904 | 0.2162   | -0.02828 | -0.38142 | -0.06832 | -0.09249 |
| -0.21659 | 0.278124 | -0.09364 | 0.062763 | 0.070386 | 0.04812  | -0.32007 | 0.05346  | 0.180343 |
| -0.03597 | -0.03416 | -0.23318 | 0.104902 | 0.081701 | 0.027982 | -0.34344 | -0.0808  | 0.19326  |
| -0.28924 | 0.179625 | -0.32929 | -0.0875  | 0.038203 | -0.09214 | -0.41834 | 0.109481 | 0.257029 |
| -0.35736 | 0.042811 | -0.24898 | -0.32379 | -0.09058 | 0.038021 | -0.36059 | 0.218449 | 0.269879 |
| -0.17319 | -0.09709 | -0.16799 | -0.04718 | 0.274698 | -0.32036 | -0.24145 | 0.178714 | 0.083532 |
| -0.17503 | 0.290765 | -0.32365 | 0.066262 | 0.107801 | -0.03163 | -0.40138 | -0.00096 | 0.197727 |
| -0.1341  | -0.01184 | -0.09828 | 0.297118 | 0.064946 | 0.00736  | -0.11722 | -0.1984  | 0.261834 |
| -0.32876 | 0.064052 | -0.21956 | 0.09329  | 0.200233 | -0.20119 | -0.24447 | 0.081697 | 0.011858 |
| -0.40179 | -0.11089 | -0.05555 | 0.20845  | 0.466001 | -0.45417 | 0.224752 | 0.458838 | -0.13738 |
| 0.182654 | 0.394056 | 0.238567 | 0.172246 | 0.018989 | -0.47955 | -0.36973 | -0.1238  | 0.367376 |
| -0.24493 | -0.00764 | 0.01466  | 0.270059 | 0.183644 | -0.22555 | -0.28056 | 0.218794 | 0.363662 |
| -0.27897 | -0.25054 | 0.093472 | 0.13268  | 0.119234 | -0.0278  | -0.34975 | 0.240358 | 0.346215 |
| -0.25022 | -0.09117 | 0.265542 | 0.383936 | 0.034843 | -0.16381 | -0.09247 | -0.23575 | 0.318387 |
| -0.12107 | -0.2735  | 0.28101  | 0.116116 | 0.215859 | -0.44409 | 0.165945 | 0.12393  | 0.14853  |
| -0.0996  | -0.1897  | 0.096466 | 0.214789 | 0.26049  | -0.26987 | -0.2876  | -0.0929  | 0.190168 |
| -0.14608 | -0.2391  | -0.06078 | 0.22101  | 0.252881 | -0.42529 | -0.40313 | 0.156897 | 0.147888 |
| 0.041268 | 0.038991 | 0.175714 | 0.174688 | 0.041959 | -0.2961  | -0.35004 | -0.03114 | 0.351667 |
| 0.045931 | -0.09325 | -0.13739 | 0.185936 | 0.018786 | -0.13123 | -0.46028 | -0.08468 | 0.154542 |
| -0.1977  | -0.10644 | -0.09798 | 0.271178 | 0.1707   | -0.2606  | -0.44574 | 0.059548 | 0.302303 |
| -0.10596 | -0.18089 | -0.20374 | 0.185097 | 0.199179 | -0.2093  | -0.37524 | -0.03802 | 0.100001 |
| -0.14489 | -0.16323 | -0.13247 | 0.127089 | 0.004045 | -0.24525 | -0.37863 | 0.044308 | 0.171397 |
| -0.09312 | -0.19835 | -0.30638 | 0.31648  | 0.119036 | -0.09347 | -0.36341 | 0.035605 | 0.316509 |
| 0.046837 | 0.09222  | 0.034036 | 0.014343 | 0.368037 | -0.40445 | -0.38464 | 0.145542 | 0.029702 |
| -0.1996  | -0.07349 | -0.20949 | 0.174976 | -0.00594 | -0.18213 | -0.41836 | -0.19302 | -0.10906 |
| -0.09321 | -0.06542 | -0.29882 | 0.08327  | 0.05074  | 0.006249 | -0.4404  | -0.16061 | 0.047365 |
| -0.28364 | -0.0808  | -0.19573 | -0.03313 | 0.256021 | -0.18436 | -0.3146  | 0.029028 | -0.09345 |
| 0.022892 | 0.273885 | 0.212932 | 0.288502 | 0.253428 | 0.173049 | 0.160456 | 0.144484 | 0.237262 |
| -0.20063 | 0.044679 | -0.17265 | 0.09383  | 0.017399 | -0.05144 | -0.35825 | 0.043863 | 0.174615 |
| -0.16539 | -0.05977 | -0.11101 | 0.02857  | 0.103321 | 0.123001 | -0.28138 | -0.03087 | 0.138684 |
| -0.24871 | -0.12869 | -0.07686 | 0.063932 | 0.232383 | -0.17364 | -0.30765 | -0.15612 | 0.022351 |
| 0.017555 | 0.20146  | -0.06325 | 0.029887 | -0.10197 | 0.175232 | -0.34722 | -0.04792 | 0.017812 |

|          |          |          |          |          |          |          |          |          |
|----------|----------|----------|----------|----------|----------|----------|----------|----------|
| -0.12045 | 0.108569 | 0.067204 | -0.04998 | 0.056973 | -0.25017 | -0.35646 | -0.13304 | -0.05162 |
| -0.16392 | -0.1279  | -0.31465 | 0.154564 | 0.165225 | -0.11713 | -0.15108 | 0.117517 | 0.062242 |
| -0.1522  | 0.121643 | -0.25039 | 0.257402 | 0.162432 | -0.01136 | -0.41965 | 0.047808 | -0.0175  |
| 0.210796 | 0.152914 | 0.265257 | 0.293051 | 0.01051  | -0.52788 | -0.35835 | 0.006197 | 0.193446 |
| -0.07587 | 0.000748 | 0.022634 | 0.44923  | 0.650906 | -0.52114 | 0.52856  | 0.702977 | -0.48893 |
| 0.073554 | 0.207393 | -0.32494 | 0.071831 | 0.359559 | -0.00446 | -0.40795 | 0.110377 | 0.128606 |
| -0.11145 | -0.28181 | -0.0254  | 0.141418 | 0.396633 | -0.34425 | -0.34637 | -0.10721 | -0.06074 |
| 0.142974 | -0.04841 | -0.00333 | 0.16915  | -0.21775 | -0.17089 | 0.10604  | 0.075192 | -0.27511 |
| 0.407919 | -0.23889 | 0.096629 | -0.05326 | -0.21815 | -0.20058 | 0.133208 | 0.038043 | -0.43163 |
| 0.005841 | -0.03875 | -0.13937 | 0.301554 | 0.080711 | -0.03364 | -0.14698 | -0.22692 | 0.029978 |
| 0.395152 | -0.071   | -0.02788 | 0.061925 | -0.20403 | -0.14702 | 0.153877 | -0.01551 | -0.35864 |
| -0.33265 | -0.14153 | -0.08373 | -0.33154 | 0.317374 | -0.36088 | 0.031876 | 0.39094  | -0.29576 |
| -0.10828 | -0.18512 | -0.05729 | -0.05119 | 0.102029 | -0.0404  | -0.22108 | 0.103315 | 0.201789 |
| -0.10235 | -0.09038 | -0.19382 | 0.173439 | 0.005472 | -0.12278 | -0.36001 | 0.209255 | 0.285096 |
| -0.16243 | 0.000375 | -0.13961 | 0.284726 | 0.154313 | -0.37191 | -0.39737 | 0.374718 | 0.437065 |
| -0.10067 | 0.081025 | -0.05399 | 0.012219 | -0.0196  | -0.08302 | -0.31541 | -0.04564 | 0.164789 |
| 0.051465 | 0.180771 | -0.19554 | -0.09019 | 0.065005 | -0.08309 | -0.37108 | -0.02359 | 0.019692 |
| -0.11573 | -0.13051 | -0.34559 | 0.15816  | 0.121776 | 0.022249 | -0.49485 | 0.183741 | 0.138658 |
| -0.12644 | 0.203754 | -0.21062 | 0.111654 | 0.066929 | -0.05248 | -0.42452 | 0.063843 | 0.214088 |
| 0.091454 | 0.174677 | -0.24729 | 0.031253 | 0.12221  | -0.03418 | -0.41922 | 0.153608 | 0.237234 |
| -0.00617 | 0.072034 | -0.1858  | -0.00345 | 0.167021 | 0.165461 | -0.36876 | -0.10131 | 0.104902 |
| -0.10426 | 0.087946 | -0.16917 | -0.0029  | 0.168668 | -0.04539 | -0.35871 | -0.01215 | 0.180436 |
| 0.053803 | 0.363254 | -0.17596 | -0.02128 | -0.01829 | -0.0029  | -0.32813 | -0.03312 | 0.025942 |
| -0.00914 | 0.152936 | 0.199951 | -0.13726 | -0.23964 | -0.29655 | -0.14667 | -0.1505  | 0.197095 |
| -0.02722 | 0.20518  | -0.03278 | -0.16615 | 0.248117 | -0.00766 | -0.26466 | 0.195938 | 0.113961 |
| 0.291493 | 0.048926 | -0.09625 | -0.02386 | 0.054723 | 0.098778 | -0.2434  | 0.08788  | 0.094183 |
| -0.01766 | -0.06548 | -0.12296 | -0.08279 | 0.178719 | -0.1451  | -0.43816 | -0.04308 | 0.245442 |
| -0.08149 | -0.1151  | -0.12033 | 0.150167 | 0.01724  | -0.36321 | -0.52192 | 0.219326 | 0.314864 |
| -0.0365  | 0.048537 | -0.07609 | -0.16583 | -0.17504 | 0.059295 | -0.36603 | -0.09693 | 0.317578 |
| 0.227629 | 0.054806 | -0.28427 | -0.01315 | 0.205962 | -0.06998 | -0.35244 | 0.024694 | 0.094258 |
| 0.100075 | 0.064569 | 0.239001 | -0.19796 | 0.285475 | -0.602   | -0.46832 | 0.133365 | 0.092739 |
| 0.182792 | 0.30025  | 0.350394 | -0.00709 | 0.134117 | -0.51759 | -0.35745 | -0.14177 | 0.450635 |
| 0.21867  | 0.202377 | 0.350177 | 0.026531 | -0.03988 | -0.56799 | -0.41448 | -0.13839 | 0.415458 |
| 0.085643 | 0.188737 | 0.366442 | 0.042417 | -0.03478 | -0.56948 | -0.4488  | 0.092613 | 0.378572 |
| 0.013761 | 0.159398 | -0.1129  | -0.0401  | -0.04305 | -0.30439 | -0.40645 | -0.02673 | 0.3464   |

| TCGA-OE-A | TCGA-PZ-A | TCGA-RB-A | TCGA-RL-A | TCGA-US-A | TCGA-US-A | TCGA-YH-A | TCGA-YY-A | TCGA-2J-A |
|-----------|-----------|-----------|-----------|-----------|-----------|-----------|-----------|-----------|
| -0.42875  | -0.32692  | -0.13466  | -0.26397  | 0.349319  | 0.210988  | -0.08127  | -0.2783   | 0.055238  |
| -0.48961  | -0.04012  | -0.60091  | 0.10779   | 0.610676  | -0.3166   | -0.01976  | -0.06832  | -0.15885  |
| -0.18666  | 0.041389  | -0.08216  | -0.34257  | 0.343617  | 0.052164  | -0.09072  | -0.01565  | 0.056376  |
| -0.00324  | 0.315927  | -0.5079   | 0.283333  | 0.238692  | 0.30985   | 0.002678  | -0.38182  | 0.080963  |
| 0.046614  | 0.053678  | -0.24557  | 0.056339  | 0.499001  | -0.06557  | 0.447518  | -0.01464  | 0.098023  |
| -0.12596  | 0.031579  | -0.16103  | -0.12072  | 0.194585  | 0.108743  | -0.11482  | -0.10319  | -0.10466  |
| 0.011901  | -0.03689  | 0.044256  | -0.02678  | 0.402783  | 0.231074  | -0.37794  | 0.279939  | -0.194    |
| 0.058602  | 0.069298  | -0.15172  | -0.28696  | -0.04587  | 0.177356  | -0.02043  | 0.168242  | -0.21412  |
| 0.05357   | 0.085033  | -0.19994  | 0.062731  | 0.026177  | 0.316266  | 0.002299  | 0.202475  | -0.18276  |
| 0.147447  | 0.184376  | -0.1259   | 0.331054  | 0.309843  | 0.171377  | 0.181137  | 0.16586   | -0.30414  |
| 0.206882  | 0.15524   | -0.4247   | -0.2795   | 0.240164  | 0.551366  | 0.214519  | 0.327047  | -0.33249  |
| 0.13559   | 0.12727   | -0.46857  | -0.08851  | 0.267483  | 0.291625  | 0.224722  | 0.235262  | -0.23416  |
| -0.20042  | 0.136355  | 0.146122  | -0.26358  | 0.23567   | 0.13023   | -0.07073  | 0.109144  | -0.43576  |
| 0.038282  | 0.218112  | 0.0821    | 0.106587  | 0.254291  | -0.01374  | 0.211063  | -0.11429  | -0.04339  |
| -0.02504  | 0.308254  | -0.32186  | 0.152779  | 0.568827  | -0.57061  | 0.230079  | -0.16789  | -0.41786  |
| -0.16785  | -0.33111  | -0.35833  | 0.136093  | 0.634011  | -0.5691   | 0.014251  | -0.45801  | -0.24216  |
| 0.02656   | 0.318136  | -0.06621  | -0.16851  | 0.159619  | -0.30424  | 0.07221   | 0.053244  | 0.384488  |
| 0.139248  | -0.00706  | -0.26904  | -0.13415  | 0.134861  | -0.15948  | -0.37689  | -0.1632   | -0.09857  |
| 0.330109  | 0.245538  | -0.14689  | 0.183354  | 0.253073  | -0.15684  | -0.31564  | -0.03583  | 0.058079  |
| 0.087987  | -0.17048  | -0.04926  | -0.1422   | 0.243732  | 0.273048  | -0.17418  | 0.467118  | -0.02646  |
| -0.35359  | -0.28737  | 0.042622  | -0.15716  | -0.34824  | -0.13165  | -0.09289  | 0.149297  | 0.192229  |
| -0.25382  | -0.42839  | 0.161609  | -0.35367  | -0.18203  | 0.397765  | -0.15287  | 0.010112  | 0.32676   |
| 0.334823  | 0.220423  | -0.17008  | -0.02808  | -0.29208  | 0.021635  | -0.00418  | 0.047997  | 0.198338  |
| -0.226    | 0.26582   | -0.41591  | 0.123177  | 0.422653  | -0.26442  | -0.12462  | -0.28305  | -0.19995  |
| 0.224857  | 0.209147  | 0.027044  | 0.184008  | -0.27954  | -0.17118  | 0.208686  | 0.135544  | 0.089586  |
| -0.15003  | 0.16151   | -0.47294  | 0.352656  | 0.516936  | -0.32493  | 0.192627  | -0.05353  | -0.08584  |
| -0.47849  | 0.051974  | -0.05954  | -0.55097  | -0.43002  | 0.022264  | 0.468196  | 0.282376  | 0.315462  |
| -0.13592  | -0.19785  | 0.005502  | -0.13255  | 0.246854  | 0.158572  | 0.108209  | 0.110634  | -0.1817   |
| -0.13878  | 0.200966  | -0.00274  | 0.247543  | 0.406152  | 0.039892  | -0.37665  | 0.129703  | -0.43403  |
| -0.24387  | 0.355818  | 0.425655  | -0.09993  | 0.032254  | -0.10369  | 0.011575  | -0.17899  | 0.051562  |
| 0.078861  | 0.221987  | -0.36723  | 0.511551  | 0.538164  | -0.51202  | -0.24885  | -0.59153  | -0.26369  |
| 0.236342  | 0.242755  | -0.35416  | 0.486324  | 0.387267  | -0.25691  | -0.13233  | -0.01091  | -0.26623  |
| -0.24359  | -0.04335  | 0.016763  | -0.19645  | -0.10789  | -0.19615  | 0.182648  | -0.1419   | 0.230595  |
| -0.24107  | -0.10803  | 0.14826   | -0.23277  | -0.05614  | -0.13551  | 0.233075  | -0.23606  | 0.305413  |
| -0.27052  | -0.05748  | 0.117151  | -0.03985  | 0.035729  | -0.22378  | 0.185296  | -0.16921  | 0.09094   |
| -0.03548  | 0.348172  | -0.17144  | 0.084134  | 0.26232   | -0.13543  | 0.010475  | 0.072861  | 0.072872  |
| -0.31914  | 0.029445  | -0.09349  | 0.28502   | 0.425902  | -0.31831  | -0.38759  | -0.3013   | -0.17754  |
| 0.080836  | 0.271617  | -0.40127  | 0.221918  | 0.18507   | 0.155155  | -0.00531  | 0.257327  | 0.213824  |
| 0.175428  | 0.590431  | -0.36171  | -0.1943   | 0.585373  | 0.445375  | -0.10528  | 0.334309  | -0.28133  |
| 0.085731  | 0.368208  | -0.37013  | -0.39918  | 0.031852  | 0.325704  | 0.035302  | 0.458197  | 0.276426  |
| -0.16373  | 0.397733  | -0.28176  | -0.10082  | 0.289433  | 0.113897  | 0.055216  | -0.01558  | 0.355939  |
| 0.078037  | 0.392017  | 0.018273  | 0.12613   | 0.651919  | 0.571387  | -0.06369  | 0.1968    | -0.47901  |
| -0.22079  | -0.21861  | 0.109414  | 0.485507  | 0.636676  | 0.12173   | -0.4761   | -0.15844  | -0.4856   |
| -0.04397  | -0.29912  | 0.445663  | 0.276012  | 0.37576   | 0.345799  | -0.4301   | -0.23602  | 0.35311   |
| -0.16367  | -0.2633   | 0.364671  | 0.450886  | 0.604992  | -0.31497  | -0.34217  | -0.12529  | -0.30795  |
| 0.186213  | 0.265887  | 0.02916   | 0.158055  | 0.410949  | 0.470701  | -0.03571  | 0.234316  | -0.25654  |
| 0.34171   | 0.314671  | -0.2126   | 0.385565  | -0.22621  | -0.32084  | 0.065788  | 0.046684  | -0.22556  |
| 0.095688  | -0.05679  | -0.12366  | 0.073673  | 0.065857  | -0.16768  | -0.01953  | 0.068506  | 0.052006  |
| 0.23229   | -0.02823  | -0.28734  | -0.08779  | 0.070713  | -0.06514  | -0.12285  | 0.329515  | 0.200792  |

|          |          |          |          |          |          |          |          |          |
|----------|----------|----------|----------|----------|----------|----------|----------|----------|
| -0.02224 | 0.119837 | -0.20737 | -0.16491 | 0.368401 | 0.103607 | -0.23315 | -0.07197 | -0.16642 |
| 0.107222 | -0.16104 | -0.17661 | 0.302886 | 0.466353 | 0.190943 | -0.51426 | -0.2166  | -0.01937 |
| -0.34934 | -0.25725 | -0.04289 | 0.091275 | 0.432139 | -0.12022 | -0.21943 | -0.25926 | -0.06956 |
| -0.19448 | -0.32739 | 0.002155 | 0.397245 | 0.529696 | 0.243265 | -0.53942 | -0.35036 | -0.37576 |
| -0.34216 | -0.35704 | 0.136724 | -0.19204 | 0.379389 | 0.061597 | -0.21074 | -0.36083 | -0.00226 |
| 0.027939 | 0.232109 | -0.24576 | 0.110169 | 0.419733 | 0.209899 | 0.048995 | 0.076991 | -0.30615 |
| 0.110773 | 0.161111 | -0.24908 | 0.33041  | 0.262789 | 0.284259 | -0.34157 | 0.077907 | -0.26117 |
| 0.276899 | 0.149059 | -0.18095 | 0.398081 | 0.201137 | 0.135291 | -0.24995 | -0.15067 | -0.10362 |
| 0.259875 | 0.181945 | -0.27756 | 0.226788 | 0.326456 | 0.098366 | -0.17527 | -0.2086  | -0.24517 |
| -0.22941 | -0.08316 | -0.13249 | 0.446591 | 0.446069 | 0.039262 | -0.2515  | -0.2798  | -0.15839 |
| -0.33138 | -0.36054 | 0.284228 | 0.194822 | 0.372078 | 0.142102 | -0.38297 | -0.29421 | -0.44729 |
| 0.215689 | -0.1424  | 0.455137 | 0.508098 | 0.302138 | -0.02368 | -0.33339 | 0.262955 | -0.41824 |
| -0.06166 | -0.38199 | -0.07667 | 0.217671 | 0.28701  | 0.164988 | -0.22213 | 0.133897 | -0.19363 |
| 0.057194 | -0.04986 | -0.22259 | 0.428257 | 0.498048 | 0.082332 | 0.168748 | -0.15396 | -0.04751 |
| -0.07006 | 0.371306 | -0.18538 | -0.07634 | 0.390064 | 0.216569 | -0.02685 | 0.092968 | 0.086628 |
| -0.06863 | 0.335984 | -0.47177 | -0.04313 | -0.0249  | -0.03837 | -0.17449 | -0.08221 | 0.458997 |
| -0.12446 | -0.07878 | -0.46677 | -0.03461 | 0.459015 | -0.55775 | 0.593407 | -0.40586 | 0.336226 |
| -0.03781 | 0.069072 | -0.28915 | 0.136291 | 0.266987 | -0.24605 | 0.400656 | -0.30145 | 0.184555 |
| -0.31113 | -0.12532 | -0.12211 | -0.31418 | 0.144654 | 0.204617 | -0.14971 | -0.01322 | -0.3035  |
| -0.0474  | 0.133291 | -0.12236 | 0.329147 | 0.419593 | -0.13263 | -0.38098 | -0.18473 | -0.03178 |
| 0.078069 | -0.37629 | -0.52468 | 0.138145 | -0.0997  | -0.23799 | -0.26361 | -0.24709 | 0.312502 |
| -0.32793 | -0.38865 | 0.191013 | 0.371922 | 0.520453 | -0.00581 | -0.43234 | -0.38932 | -0.53936 |
| 0.118689 | 0.002164 | 0.054226 | 0.343203 | 0.306788 | 0.24927  | -0.35629 | -0.33322 | -0.30679 |
| 0.029393 | 0.047868 | -0.49397 | -0.26158 | 0.032319 | 0.257987 | -0.14773 | 0.263934 | 0.246914 |
| 0.361701 | 0.195039 | 0.07904  | 0.205645 | 0.241702 | 0.219419 | 0.371267 | -0.02561 | 0.252807 |
| 0.111304 | 0.415495 | -0.00033 | 0.160384 | 0.435968 | 0.4481   | -0.01444 | 0.227839 | -0.38511 |
| 0.27803  | 0.53385  | 0.17133  | 0.162259 | 0.48882  | 0.402214 | 0.038843 | 0.312376 | -0.12441 |
| 0.430196 | -0.26745 | 0.422969 | 0.302355 | 0.469766 | 0.519419 | -0.22336 | -0.18974 | 0.402407 |
| 0.048311 | 0.312185 | -0.33365 | -0.08971 | -0.07453 | 0.280566 | -0.24481 | 0.259253 | -0.21679 |
| 0.190682 | 0.32487  | 0.266678 | 0.099862 | 0.012829 | 0.111886 | 0.115066 | 0.525035 | 0.020427 |
| 0.258283 | 0.328936 | -0.19935 | 0.367705 | 0.48926  | 0.459608 | 0.031091 | 0.2406   | -0.27347 |
| 0.237457 | 0.295571 | -0.23124 | 0.308733 | 0.491007 | 0.484948 | -0.06326 | 0.14063  | -0.32479 |
| 0.190385 | 0.420691 | -0.07567 | -0.13251 | 0.381363 | 0.426284 | 0.102484 | 0.332199 | -0.03324 |
| -0.22624 | 0.1014   | 0.33534  | -0.12002 | 0.077951 | -0.01816 | -0.2832  | -0.0224  | 0.150341 |
| -0.14335 | -0.00074 | -0.1357  | -0.06751 | 0.272923 | 0.098931 | 0.023208 | -0.16125 | -0.28021 |
| 0.590908 | -0.43143 | 0.233672 | 0.610516 | -0.34575 | -0.57826 | -0.48028 | 0.334924 | -0.38729 |
| -0.08545 | -0.24233 | -0.14769 | -0.06474 | -0.47849 | -0.28408 | 0.05068  | 0.255103 | 0.311699 |
| 0.24036  | -0.23809 | -0.1534  | 0.23548  | 0.109543 | -0.38442 | 0.050506 | 0.321844 | 0.069408 |
| 0.439489 | -0.18663 | -0.3425  | 0.187942 | -0.01708 | -0.04909 | 0.156384 | 0.05199  | 0.550102 |
| -0.23015 | -0.13698 | 0.367735 | 0.203958 | -0.4533  | -0.31665 | -0.18274 | 0.168128 | -0.04544 |
| 0.024157 | 0.273147 | 0.296101 | 0.160824 | 0.425601 | -0.62997 | -0.011   | 0.207952 | 0.257386 |
| -0.48783 | -0.38393 | 0.142628 | 0.198403 | -0.08313 | -0.65382 | -0.26674 | -0.55848 | 0.32316  |
| -0.08316 | 0.215864 | -0.18473 | -0.00065 | 0.290825 | 0.063296 | -0.37956 | 0.02883  | -0.31562 |
| 0.474432 | 0.33463  | -0.19946 | -0.10215 | -0.15426 | 0.267293 | 0.256244 | 0.43895  | 0.274461 |
| 0.145322 | -0.07684 | 0.038142 | -0.03118 | -0.12542 | -0.1615  | -0.0649  | 0.048825 | 0.438753 |
| 0.186672 | -0.18382 | 0.147625 | -0.00529 | -0.08343 | -0.232   | -0.0247  | -0.20601 | 0.577552 |
| 0.461772 | -0.12296 | -0.4238  | -0.38698 | -0.27802 | 0.415676 | 0.196579 | 0.205141 | 0.498884 |
| -0.23148 | 0.046563 | 0.023574 | -0.05214 | 0.04251  | -0.08406 | 0.05833  | -0.12043 | 0.044838 |
| -0.38636 | -0.13411 | 0.004759 | -0.36452 | 0.151442 | -0.07554 | -0.12818 | -0.30978 | 0.101114 |
| -0.13961 | -0.01756 | -0.05275 | 0.133386 | 0.060356 | -0.11335 | -0.06489 | -0.05029 | -0.25058 |

|          |          |          |          |          |          |          |          |          |
|----------|----------|----------|----------|----------|----------|----------|----------|----------|
| 0.012154 | 0.17485  | -0.02623 | 0.36061  | 0.364394 | -0.33603 | 0.068893 | -0.2711  | -0.17882 |
| -0.22341 | 0.10544  | -0.00638 | 0.138767 | 0.336695 | -0.14695 | -0.21241 | -0.34003 | -0.04237 |
| -0.28924 | 0.056357 | -0.09203 | -0.30783 | 0.017176 | 0.088198 | -0.20361 | 0.008891 | -0.29019 |
| -0.01222 | -0.03756 | 0.098309 | 0.319742 | 0.188043 | -0.22226 | -0.15001 | -0.17407 | -0.08641 |
| -0.15875 | -0.24592 | 0.096716 | -0.23237 | -0.2573  | 0.022326 | 0.122827 | -0.19702 | 0.326674 |
| -0.22544 | -0.20823 | 0.256108 | -0.14734 | -0.06753 | -0.01846 | -0.05075 | -0.22311 | 0.12311  |
| 0.111036 | -0.05238 | -0.09416 | -0.35845 | -0.31843 | 0.044641 | 0.180498 | 0.079716 | 0.070746 |
| -0.35404 | -0.27451 | 0.04694  | -0.34346 | -0.1469  | -0.0265  | -0.02319 | -0.19819 | 0.121363 |
| -0.0964  | -0.09134 | -0.10638 | 0.184572 | -0.23257 | -0.02603 | -0.28368 | -0.10501 | 0.044385 |
| -0.16673 | 0.117054 | 0.141185 | -0.15902 | 0.138982 | 0.063771 | -0.02859 | -0.10902 | 0.061618 |
| 0.111242 | 0.083529 | -0.17894 | 0.182468 | 0.395241 | 0.40525  | -0.3975  | 0.276196 | -0.32854 |
| -0.26428 | -0.41321 | -0.20941 | -0.23751 | 0.066849 | -0.11126 | -0.33259 | -0.33493 | 0.104894 |
| -0.16128 | 0.019671 | 0.074566 | -0.20056 | 0.091031 | 0.176587 | -0.10822 | 0.02172  | -0.09532 |
| -0.20048 | -0.1514  | 0.108591 | 0.03777  | 0.028366 | -0.09037 | -0.1077  | -0.07819 | -0.24712 |
| -0.21426 | -0.12187 | 0.142533 | -0.13412 | 0.018827 | -0.07766 | 0.038095 | -0.12632 | -0.04742 |
| -0.31664 | -0.33454 | 0.1917   | -0.37845 | 0.202773 | -0.20186 | -0.21072 | 0.043894 | -0.1925  |
| -0.17865 | -0.079   | 0.267542 | -0.17765 | 0.249146 | -0.09119 | 0.093093 | -0.11691 | 0.117805 |
| -0.0856  | -0.1083  | 0.034436 | -0.07446 | 0.270154 | -0.23255 | 0.232853 | -0.11809 | -0.06607 |
| -0.39819 | -0.16293 | 0.239455 | -0.20388 | 0.233062 | -0.3839  | -0.01149 | -0.32418 | -0.05288 |
| -0.19051 | 0.065566 | 0.338461 | -0.08255 | 0.158212 | -0.0746  | 0.166511 | -0.27435 | 0.154192 |
| -0.07077 | 0.009066 | -0.17558 | -0.20411 | 0.146845 | 0.093051 | 0.053697 | -0.06771 | 0.015175 |
| -0.38297 | -0.17984 | 0.19101  | -0.20426 | 0.328794 | -0.28504 | 0.129085 | -0.43983 | 0.227888 |
| -0.30576 | -0.16969 | 0.002606 | -0.16502 | 0.532935 | -0.4319  | 0.418935 | -0.52673 | 0.255704 |
| -0.21883 | -0.00049 | 0.11414  | 0.424188 | 0.384212 | -0.506   | -0.20308 | -0.4356  | -0.25611 |
| -0.48504 | -0.14647 | 0.370756 | -0.33971 | 0.062528 | 0.003353 | -0.03106 | -0.34418 | 0.126517 |
| -0.27102 | 0.058248 | 0.415134 | -0.02593 | 0.047331 | 0.042122 | 0.138884 | -0.03387 | 0.011523 |
| -0.30678 | -0.04591 | 0.301004 | -0.06956 | 0.191953 | -0.10172 | -0.07537 | -0.07757 | -0.15753 |
| 0.165716 | 0.18095  | -0.05334 | 0.398343 | 0.558677 | -0.26254 | -0.27424 | -0.36299 | -0.10211 |
| 0.027477 | 0.241481 | -0.17995 | 0.335239 | 0.229913 | -0.41936 | -0.28014 | -0.27601 | -0.4073  |
| -0.11049 | 0.133119 | -0.08682 | -0.05403 | 0.296748 | -0.21259 | 0.056152 | -0.1324  | 0.044751 |
| -0.23927 | 0.035261 | 0.179204 | -0.06839 | 0.070129 | -0.16463 | 0.085103 | -0.33272 | 0.139708 |
| 0.016662 | -0.02059 | 0.144492 | -0.15717 | -0.01512 | 0.085485 | 0.156499 | 0.146402 | 0.068595 |
| 0.181892 | -0.0089  | -0.03533 | 0.174617 | 0.246163 | 0.092109 | 0.330396 | 0.310199 | 0.13127  |
| -0.29734 | -0.0402  | -0.07495 | 0.035492 | 0.238094 | -0.17917 | -0.06655 | -0.10119 | -0.14186 |
| -0.06159 | 0.280732 | -0.28219 | 0.42758  | 0.438741 | -0.37607 | -0.0774  | -0.35871 | -0.17927 |
| -0.12678 | 0.13327  | -0.30757 | 0.038281 | 0.224136 | -0.32006 | -0.03188 | -0.13903 | -0.16703 |
| -0.29834 | -0.04138 | 0.074147 | -0.21986 | 0.075582 | -0.10494 | -0.21232 | -0.18362 | -0.11283 |
| -0.32398 | 0.19919  | -0.07488 | 0.019725 | 0.224436 | -0.02445 | -0.23953 | -0.21357 | -0.1172  |
| -0.25941 | 0.055685 | -0.28469 | -0.13953 | 0.268498 | -0.10884 | -0.24364 | -0.23842 | -0.14158 |
| -0.21451 | 0.112506 | -0.09969 | -0.12403 | 0.220313 | -0.00933 | -0.07332 | -0.30718 | 0.065938 |
| -0.30035 | 0.046745 | 0.351558 | 0.014729 | 0.247585 | -0.19858 | -0.1458  | -0.28062 | -0.08645 |
| 0.1025   | 0.320689 | -0.30376 | 0.550689 | 0.41456  | -0.43913 | -0.36855 | -0.42303 | -0.52889 |
| -0.27143 | -0.07198 | 0.075723 | -0.30082 | -0.13947 | 0.107279 | -0.13758 | 0.05908  | -0.10359 |
| -0.37537 | -0.10857 | 0.157302 | -0.19848 | 0.066379 | -0.0629  | -0.23255 | -0.34401 | 0.109898 |
| -0.21145 | -0.10502 | -0.06616 | -0.22534 | 0.020997 | -0.11562 | -0.07332 | -0.01482 | -0.08621 |
| 0.044725 | 0.176797 | 0.224745 | 0.052485 | 0.076212 | 0.102445 | 0.137992 | 0.13337  | 0.049948 |
| -0.25444 | 0.048811 | 0.115243 | -0.15807 | 0.245103 | -0.21042 | 0.029417 | -0.37171 | 0.143424 |
| -0.2413  | -0.11143 | -0.16157 | -0.30881 | 0.069554 | -0.02254 | -0.23914 | -0.1628  | 0.087589 |
| -0.19534 | -0.03858 | -0.00073 | -0.22637 | 0.155317 | 0.115753 | -0.04694 | -0.0291  | -0.2956  |
| -0.20124 | -0.19585 | 0.132144 | -0.16515 | 0.07593  | -0.21709 | -0.2036  | -0.32943 | 0.162856 |

|          |          |          |          |          |          |          |          |          |
|----------|----------|----------|----------|----------|----------|----------|----------|----------|
| -0.22674 | -0.02559 | 0.155259 | -0.0423  | 0.225454 | -0.12522 | 0.098857 | -0.13818 | -0.10554 |
| -0.18017 | -0.06211 | -0.00446 | -0.29617 | 0.06727  | 0.189756 | -0.20758 | 0.056513 | 0.053922 |
| -0.30951 | -0.02599 | 0.213802 | -0.2673  | 0.116074 | 0.081162 | -0.26775 | -0.2525  | 0.180205 |
| 0.251235 | 0.358033 | -0.22432 | 0.456307 | 0.306576 | -0.48706 | -0.29357 | -0.36551 | -0.36179 |
| 0.107168 | -0.18538 | 0.653451 | 0.344571 | 0.484522 | 0.355211 | -0.56328 | 0.269538 | -0.38857 |
| -0.19028 | 0.083265 | 0.078457 | -0.07069 | 0.236875 | 0.143217 | -0.36725 | -0.24227 | -0.20712 |
| -0.40695 | -0.14258 | 0.474901 | -0.03273 | -0.01798 | -0.02591 | -0.48561 | 0.089465 | -0.43251 |
| 0.235838 | 0.211154 | -0.01124 | 0.11406  | -0.08143 | -0.1551  | 0.1001   | 0.110166 | -0.19312 |
| 0.303263 | 0.246078 | -0.15329 | 0.3406   | -0.21943 | -0.31161 | -0.05086 | -0.0349  | -0.34489 |
| -0.16304 | 0.177159 | 0.030545 | -0.09535 | 0.010477 | -0.0829  | -0.07544 | 0.130421 | -0.02534 |
| 0.212786 | 0.203131 | -0.05413 | 0.153863 | -0.15589 | -0.27708 | -0.07722 | 0.163242 | -0.16831 |
| -0.2154  | -0.04902 | 0.009969 | 0.261732 | 0.412136 | -0.51707 | -0.00938 | -0.35477 | -0.16951 |
| -0.32586 | 0.061074 | 0.017029 | 0.014865 | 0.247791 | -0.10575 | -0.01021 | -0.16427 | -0.02831 |
| -0.30009 | 0.100793 | 0.163923 | -0.17816 | 0.1891   | 0.0806   | 0.07293  | -0.12056 | -0.07441 |
| -0.21341 | 0.126496 | -0.26899 | 0.298063 | 0.437339 | -0.36159 | -0.18872 | -0.40895 | -0.19502 |
| -0.26201 | -0.02098 | 0.204865 | -0.11908 | 0.238506 | -0.11926 | 0.108477 | -0.20454 | 0.078922 |
| -0.35522 | -0.03296 | -0.01369 | -0.18171 | 0.116065 | -0.1097  | -0.22157 | -0.30213 | 0.103761 |
| -0.3961  | -0.18855 | 0.207474 | -0.32038 | 0.111447 | -0.0616  | -0.31701 | -0.28773 | 0.088818 |
| -0.21725 | 0.063141 | 0.233896 | -0.13841 | 0.191006 | 0.047682 | -0.09683 | -0.21607 | 0.278043 |
| -0.38575 | -0.16944 | 0.050933 | -0.23923 | 0.211154 | 0.005528 | -0.33253 | -0.35808 | 0.045599 |
| -0.3349  | -0.23377 | 0.181043 | -0.23085 | 0.181355 | -0.32907 | -0.07652 | -0.2717  | 0.176701 |
| -0.33893 | -0.17432 | 0.238395 | -0.18072 | 0.17087  | -0.06525 | -0.05088 | -0.24738 | 0.065718 |
| -0.3724  | -0.229   | 0.188863 | -0.2691  | 0.082135 | -0.20373 | 0.057283 | -0.24272 | 0.158093 |
| 0.049609 | 0.006117 | 0.005352 | 0.087239 | 0.368387 | -0.30589 | 0.365884 | -0.21717 | 0.066916 |
| -0.19601 | -0.06756 | 0.154767 | -0.04242 | 0.235941 | -0.27991 | 0.078987 | -0.34189 | 0.162052 |
| -0.08973 | -0.13556 | 0.176589 | -0.17459 | 0.190745 | -0.14182 | -0.09436 | -0.12251 | 0.161128 |
| -0.42265 | -0.20315 | 0.122894 | -0.29371 | 0.073218 | -0.07713 | -0.10898 | -0.19689 | 0.085152 |
| -0.26368 | 0.022187 | -0.13726 | -0.1551  | 0.316475 | -0.18577 | -0.02011 | -0.25604 | -0.0024  |
| -0.34079 | -0.1763  | 0.293471 | -0.28125 | 0.204049 | -0.05941 | 0.161317 | -0.2046  | 0.197975 |
| -0.31227 | -0.21399 | 0.11195  | -0.15628 | 0.25202  | -0.09155 | -0.36484 | -0.33536 | 0.150967 |
| 0.054767 | 0.37166  | -0.37804 | 0.539017 | 0.564754 | -0.56115 | -0.4631  | -0.48222 | -0.49466 |
| 0.279374 | 0.404206 | -0.43874 | 0.478097 | 0.397734 | -0.54018 | -0.27659 | -0.35493 | -0.44699 |
| 0.233682 | 0.379661 | -0.42472 | 0.519723 | 0.449108 | -0.58761 | -0.35644 | -0.45973 | -0.44793 |
| 0.299969 | 0.253384 | -0.47378 | 0.50371  | 0.502524 | -0.62138 | -0.32374 | -0.39414 | -0.41099 |
| 0.074503 | 0.293467 | -0.30581 | 0.233788 | 0.324456 | -0.40986 | 0.142503 | -0.36514 | -0.1215  |



| TCGA-2J-A | TCGA-2J-A | TCGA-2J-A | TCGA-2J-A | TCGA-2J-A | TCGA-2J-A | TCGA-2J-A | TCGA-2L-A | TCGA-2L-A |
|-----------|-----------|-----------|-----------|-----------|-----------|-----------|-----------|-----------|
| -0.17819  | 0.008181  | -0.00814  | -0.23818  | 0.033504  | 0.413221  | -0.52854  | -0.21823  | 0.049349  |
| -0.17593  | -0.16862  | -0.31344  | 0.165144  | -0.46392  | 0.294496  | -0.25747  | -0.49155  | -0.07179  |
| 0.134287  | -0.19644  | 0.200556  | 0.142194  | 0.450175  | -0.23097  | -0.00916  | 0.26522   | -0.41181  |
| -0.13015  | 0.287396  | 0.239595  | 0.162127  | -0.33386  | 0.367998  | 0.081592  | -0.17456  | -0.12868  |
| 0.156334  | 0.258464  | 0.137521  | 0.414726  | 0.104631  | 0.171055  | -0.16261  | 0.058887  | -0.45058  |
| -0.16399  | 0.069903  | -0.15875  | 0.239476  | 0.091283  | -0.09634  | 0.306839  | 0.23365   | -0.14794  |
| 0.234369  | 0.061874  | -0.51572  | -0.15468  | 0.279099  | -0.31441  | -0.60456  | 0.175764  | 0.123757  |
| 0.017182  | -0.0813   | -0.03114  | 0.253668  | 0.044132  | -0.30204  | 0.117539  | 0.042396  | -0.18907  |
| 0.315143  | -0.03379  | 0.136787  | 0.334349  | 0.192077  | -0.42839  | -0.06793  | 0.193045  | -0.12151  |
| 0.007469  | -0.12774  | 0.349385  | 0.160661  | 0.094783  | -0.37103  | 0.043333  | 0.021741  | 0.039009  |
| 0.264387  | -0.38952  | 0.126089  | 0.438039  | 0.02932   | -0.45073  | 0.114782  | 0.49004   | 0.088896  |
| 0.270826  | -0.12044  | 0.000244  | 0.391503  | 0.197595  | -0.44342  | 0.28794   | 0.325184  | 0.049903  |
| -0.16818  | 0.145755  | -0.0822   | 0.266893  | -0.2598   | -0.25641  | -0.1216   | -0.10449  | -0.32497  |
| 0.336085  | -0.20856  | -0.07888  | 0.317057  | 0.031462  | -0.27296  | -0.02422  | 0.069333  | -0.35193  |
| 0.244519  | 0.063735  | 0.550174  | 0.705198  | 0.073634  | 0.007814  | 0.07773   | -0.0188   | -0.54269  |
| 0.031939  | -0.19028  | 0.047859  | 0.284872  | -0.33053  | 0.487529  | -0.04983  | -0.36959  | 0.015886  |
| 0.398854  | 0.193716  | -0.11666  | -0.00154  | 0.085454  | -0.11534  | -0.24434  | 0.161839  | -0.31083  |
| -0.23779  | 0.013141  | -0.25888  | 0.019175  | -0.37181  | -0.14278  | -0.08736  | -0.22433  | -0.23314  |
| -0.26058  | -0.23663  | -0.35048  | -0.35701  | -0.2829   | 0.078295  | -0.43129  | -0.10504  | 0.205879  |
| 0.299478  | -0.11323  | 0.109132  | -0.02569  | -0.10645  | 0.151389  | -0.21637  | 0.206413  | -0.22836  |
| 0.108406  | -0.05296  | -0.10032  | -0.4034   | 0.086598  | 0.174601  | -0.0085   | 0.019402  | -0.22569  |
| 0.381298  | 0.154893  | 0.179531  | -0.16933  | 0.344419  | -0.11303  | 0.167403  | 0.291479  | -0.55712  |
| -0.03906  | -0.09424  | -0.46424  | -0.2657   | 0.19907   | 0.026083  | 0.041339  | -0.24697  | 0.001188  |
| -0.20469  | -0.02121  | -0.06485  | 0.308016  | -0.29033  | 0.195901  | 0.164597  | -0.38645  | -0.2252   |
| 0.054624  | -0.10138  | -0.05549  | -0.01669  | 0.324432  | -0.10443  | 0.358315  | 0.074093  | 0.286275  |
| -0.08045  | -0.09115  | 0.471192  | -0.00768  | 0.069364  | 0.090407  | 0.077272  | -0.30833  | 0.233963  |
| -0.33713  | -0.21561  | 0.095117  | 0.009084  | 0.055212  | -0.27853  | 0.237028  | 0.114314  | 0.241942  |
| -0.02192  | -0.18248  | 0.107093  | 0.244492  | -0.22085  | -0.09096  | 0.311003  | 0.183534  | 0.313661  |
| -0.22528  | 0.273295  | -0.5139   | 0.263452  | -0.1229   | -0.28892  | 0.252253  | -0.16525  | 0.161271  |
| 0.072765  | 0.226579  | -0.0923   | 0.077258  | 0.236967  | 0.030447  | 0.147181  | 0.107933  | -0.46674  |
| -0.1773   | 0.284918  | -0.53915  | -0.08908  | -0.42171  | 0.407113  | 0.377879  | -0.44949  | -0.46006  |
| -0.17359  | -0.05764  | -0.11997  | -0.0735   | -0.28265  | 0.337135  | 0.038304  | -0.30955  | -0.44247  |
| 0.272086  | 0.047537  | 0.188478  | 0.01099   | 0.25943   | 0.032076  | 0.338786  | 0.285411  | -0.24988  |
| 0.133504  | 0.284809  | 0.037054  | 0.093365  | 0.351125  | -0.07355  | 0.319449  | 0.279629  | -0.3216   |
| 0.188385  | 0.194564  | 0.085725  | -0.00224  | 0.280225  | 0.009295  | 0.375011  | 0.1808    | -0.21932  |
| -0.09001  | -0.09838  | 0.06665   | 0.169743  | 0.104663  | -0.20868  | 0.316691  | 0.212701  | 0.060644  |
| -0.08558  | 0.371967  | -0.52358  | -0.18034  | -0.38424  | 0.303772  | 0.579754  | -0.08228  | 0.019023  |
| -0.47751  | 0.005509  | -0.11582  | 0.182349  | -0.02059  | 0.049152  | 0.051024  | 0.009111  | 0.019603  |
| -0.02221  | -0.30319  | -0.26392  | 0.068736  | -0.20197  | -0.29867  | -0.37128  | 0.244464  | -0.12798  |
| -0.20532  | -0.2354   | -0.41923  | 0.061842  | -0.23188  | -0.11024  | -0.13501  | 0.398498  | 0.070564  |
| -0.48134  | 0.077666  | -0.37663  | 0.321006  | -0.27967  | -0.01825  | 0.21679   | -0.08611  | 0.065766  |
| 0.204525  | -0.26095  | 0.064576  | 0.321484  | -0.02294  | -0.47116  | -0.2499   | 0.558214  | -0.30553  |
| -0.20358  | 0.001911  | 0.251877  | -0.00927  | -0.36057  | -0.36169  | 0.355598  | -0.26489  | -0.24359  |
| -0.15497  | 0.51049   | -0.51433  | 0.353174  | 0.316685  | -0.52225  | -0.53806  | 0.690608  | -0.34796  |
| 0.123951  | 0.072923  | 0.21924   | 0.157268  | -0.47106  | -0.23885  | -0.07846  | -0.20275  | 0.374044  |
| 0.196663  | -0.13378  | 0.200299  | 0.230009  | 0.130188  | -0.41278  | -0.27131  | 0.265061  | -0.22763  |
| 0.106827  | -0.29362  | -0.18543  | -0.02452  | 0.071149  | -0.10568  | 0.402131  | -0.25672  | 0.409242  |
| 0.047172  | -0.0515   | -0.0801   | -0.15665  | 0.013139  | 0.119395  | -0.13753  | 0.08913   | -0.18586  |
| -0.03133  | -0.05964  | -0.31771  | -0.17732  | 0.031913  | 0.275082  | -0.38201  | 0.2345    | -0.15736  |

|          |          |          |          |          |          |          |          |          |
|----------|----------|----------|----------|----------|----------|----------|----------|----------|
| -0.03697 | 0.131311 | -0.15723 | 0.195504 | -0.10546 | -0.13039 | -0.03738 | 0.008576 | -0.1265  |
| -0.37564 | 0.589529 | 0.336044 | -0.35684 | -0.25739 | -0.03179 | -0.06564 | -0.35622 | 0.048632 |
| -0.15117 | 0.323273 | -0.05731 | -0.35339 | -0.34544 | 0.033991 | 0.148393 | 0.012944 | -0.27331 |
| -0.05143 | 0.241175 | -0.13573 | -0.05093 | -0.42797 | -0.23383 | 0.344937 | -0.07769 | -0.09547 |
| -0.17465 | 0.032614 | -0.15055 | 0.019897 | -0.31697 | -0.12309 | 0.216721 | 0.006355 | -0.17132 |
| 0.027385 | 0.147932 | -0.17708 | 0.032488 | 0.00476  | -0.22739 | 0.305823 | 0.293747 | -0.22138 |
| 0.073993 | -0.09726 | 0.355581 | 0.006826 | -0.03585 | -0.39881 | 0.093577 | 0.149674 | -0.17847 |
| -0.09236 | 0.097492 | 0.273083 | -0.11573 | 0.155996 | -0.21331 | 0.095687 | -0.01751 | -0.02218 |
| -0.1536  | 0.234768 | -0.06286 | 0.248229 | -0.0419  | -0.41283 | 0.265357 | 0.357714 | -0.11238 |
| -0.21911 | 0.353776 | -0.0754  | -0.06628 | 0.109563 | -0.13112 | 0.313868 | -0.14768 | -0.20581 |
| -0.04267 | 0.248997 | 0.238637 | -0.01262 | -0.10745 | -0.29119 | 0.324932 | 0.016541 | -0.14811 |
| -0.27893 | 0.574094 | 0.45784  | 0.405116 | 0.168408 | -0.40964 | -0.56177 | -0.08823 | 0.245814 |
| -0.1339  | 0.305604 | 0.071045 | -0.32021 | -0.30891 | -0.30897 | -0.4341  | -0.13112 | -0.23536 |
| -0.10137 | 0.161248 | 0.052509 | -0.28124 | 0.128414 | -0.0124  | -0.14104 | -0.19703 | -0.20859 |
| -0.00964 | 0.004096 | -0.11442 | 0.148747 | 0.168372 | -0.19303 | 0.052123 | 0.053606 | -0.0734  |
| -0.21974 | -0.16696 | -0.27535 | 0.124253 | -0.36321 | 0.263131 | -0.07182 | -0.08957 | -0.14289 |
| 0.383329 | 0.308965 | 0.154405 | 0.346083 | 0.250686 | 0.344939 | 0.070412 | -0.27588 | -0.36856 |
| 0.089164 | 0.021784 | 0.214854 | 0.232299 | 0.060457 | 0.344472 | -0.39273 | -0.18925 | -0.12801 |
| -0.04656 | -0.00194 | 0.025664 | 0.244054 | -0.17629 | -0.26299 | 0.284171 | 0.05187  | -0.01295 |
| -0.33791 | 0.150129 | -0.274   | -0.21146 | -0.42324 | -0.00305 | 0.391366 | 0.183351 | -0.00743 |
| -0.1759  | 0.505096 | -0.56064 | 0.103491 | -0.23243 | 0.37138  | 0.315056 | -0.20081 | 0.02574  |
| -0.11189 | 0.273321 | -0.10956 | -0.18275 | -0.19799 | -0.33238 | 0.542161 | 0.087989 | -0.26306 |
| -0.05655 | 0.060171 | -0.26223 | 0.157831 | -0.13538 | -0.26655 | 0.183136 | 0.225414 | -0.02133 |
| 0.505308 | 0.26221  | 0.110835 | -0.06231 | -0.20032 | 0.135592 | -0.42957 | 0.50909  | -0.53569 |
| 0.380822 | 0.009203 | 0.194889 | 0.08279  | -0.30216 | 0.212951 | -0.52901 | 0.295179 | -0.12158 |
| 0.022671 | -0.38723 | 0.17058  | 0.127111 | 0.042001 | -0.34907 | -0.09121 | 0.247451 | -0.04979 |
| 0.06879  | -0.15353 | -0.05875 | 0.322522 | 0.000977 | -0.02996 | -0.14309 | 0.213903 | -0.07975 |
| 0.359533 | 0.011476 | -0.49128 | 0.488706 | 0.097447 | -0.11846 | -0.00506 | 0.456955 | -0.54261 |
| 0.081296 | -0.32343 | -0.11822 | 0.136184 | -0.0943  | -0.39798 | 0.231592 | 0.211825 | -0.03344 |
| 0.470188 | -0.0211  | -0.14983 | 0.335028 | -0.00632 | -0.43627 | -0.40818 | -0.2827  | -0.49709 |
| -0.01206 | -0.20261 | 0.327331 | -0.01047 | 0.2267   | -0.48498 | -0.00301 | 0.158975 | -0.12331 |
| 0.039647 | -0.13867 | 0.358821 | -0.04342 | 0.233124 | -0.46633 | 0.077485 | 0.189926 | -0.1389  |
| -0.06252 | -0.22121 | 0.098438 | 0.210781 | 0.166354 | -0.21074 | -0.22841 | 0.383901 | -0.12177 |
| 0.037451 | 0.150492 | -0.09993 | -0.1749  | 0.381248 | -0.42667 | 0.009173 | -0.06707 | -0.37606 |
| -0.10451 | -0.19461 | 0.059752 | -0.21419 | 0.014844 | -0.12303 | 0.081546 | -0.26027 | -0.02053 |
| 0.119788 | -0.27783 | 0.29934  | -0.50936 | -0.42917 | -0.00917 | -0.29086 | 0.178585 | -0.25158 |
| 0.170615 | -0.32032 | -0.285   | -0.45989 | -0.19085 | 0.230408 | -0.29364 | 0.253402 | -0.09558 |
| -0.05882 | -0.13493 | -0.23012 | -0.22545 | 0.296683 | 0.295922 | -0.36193 | 0.071838 | 0.021183 |
| -0.15178 | 0.134674 | -0.43065 | -0.54117 | -0.28905 | 0.718715 | -0.37862 | 0.253327 | -0.11483 |
| 0.172169 | -0.08124 | -0.07879 | -0.41414 | 0.177609 | 0.214073 | -0.34558 | -0.04946 | -0.23929 |
| 0.35281  | 0.169774 | -0.38282 | -0.50184 | 0.508054 | 0.462979 | -0.12402 | -0.27261 | -0.5762  |
| 0.106768 | 0.224711 | -0.4323  | -0.70383 | -0.11014 | 0.17048  | -0.60305 | -0.35045 | 0.209351 |
| -0.10576 | -0.02374 | 0.045245 | 0.056661 | -0.31151 | -0.23703 | 0.259231 | 0.028766 | -0.05767 |
| -0.10558 | -0.24096 | 0.003142 | -0.08386 | -0.06102 | 0.36235  | -0.35147 | 0.383648 | -0.01545 |
| 0.230595 | -0.11369 | -0.12074 | -0.22601 | -0.05144 | 0.477634 | -0.35432 | 0.021654 | 0.246483 |
| -0.29199 | -0.19037 | -0.26405 | -0.49568 | -0.34196 | 0.622707 | -0.51742 | 0.102924 | -0.13057 |
| 0.344059 | -0.00714 | -0.11552 | -0.36613 | -0.10621 | 0.605047 | -0.44285 | 0.229253 | -0.19551 |
| 0.025701 | 0.194788 | 0.03017  | -0.02649 | -0.02706 | -0.06483 | 0.266243 | 0.064504 | -0.19956 |
| -0.2758  | 0.220971 | -0.04838 | -0.31877 | -0.1059  | -0.1307  | 0.145704 | -0.15245 | -0.32835 |
| -0.2024  | 0.20991  | 0.053121 | 0.112625 | -0.01837 | -0.03511 | 0.437266 | -0.01679 | 0.042876 |

|          |          |          |          |          |          |          |          |          |
|----------|----------|----------|----------|----------|----------|----------|----------|----------|
| -0.0582  | 0.196544 | -0.04676 | 0.071318 | -0.2148  | 0.125922 | 0.132757 | -0.17977 | -0.35688 |
| -0.2701  | 0.138571 | -0.29297 | -0.08382 | -0.24912 | 0.071035 | 0.348205 | -0.33654 | -0.4056  |
| -0.04534 | -0.12888 | 0.100024 | 0.242343 | -0.06519 | -0.21879 | 0.461398 | 0.054383 | -0.1575  |
| -0.20042 | 0.244271 | -0.02542 | 0.095761 | 0.066823 | 0.054613 | 0.253156 | -0.13504 | 0.128046 |
| 0.128691 | -0.20144 | -0.18799 | -0.39482 | -0.18977 | 0.334556 | -0.37094 | 0.213499 | -0.33207 |
| 0.013681 | 0.176706 | -0.14839 | -0.34881 | -0.09055 | 0.126188 | 0.032908 | -0.02644 | -0.29456 |
| 0.039498 | -0.14862 | 0.228104 | 0.166299 | 0.015433 | -0.02653 | -0.36708 | 0.293689 | -0.33104 |
| -0.20114 | -0.04872 | -0.06033 | -0.27468 | -0.07875 | 0.034755 | -0.101   | -0.16819 | -0.17355 |
| -0.27464 | 0.058838 | -0.09503 | 0.023562 | -0.33089 | 0.146045 | 0.082648 | -0.0627  | 0.234823 |
| -0.07163 | 0.200661 | 0.048322 | 0.162876 | -0.10097 | -0.15671 | 0.102722 | 0.000196 | -0.35482 |
| -0.23451 | -0.00352 | 0.155172 | 0.006809 | 0.088623 | -0.22228 | -0.05711 | -0.19025 | -0.10743 |
| -0.31406 | 0.083418 | -0.1413  | -0.10835 | -0.3534  | 0.039431 | 0.322704 | -0.33989 | -0.17907 |
| -0.32881 | 0.035773 | 0.087863 | 0.035505 | -0.13763 | -0.08638 | 0.03321  | -0.10452 | -0.44066 |
| 0.036239 | 0.197875 | 0.055448 | 0.132812 | 0.014225 | 0.018673 | 0.444021 | 0.024789 | -0.09171 |
| -0.06107 | 0.207509 | 0.132883 | 0.045766 | 0.147861 | -0.08961 | 0.151551 | -0.07148 | -0.23189 |
| -0.20728 | 0.319915 | 0.12513  | -0.25044 | -0.07785 | -0.25652 | 0.355583 | -0.0579  | -0.12574 |
| -0.13762 | 0.112846 | -0.09493 | 0.280561 | 0.222212 | -0.23591 | -0.19869 | -0.20382 | -0.04132 |
| 0.015827 | 0.322203 | 0.417363 | 0.319195 | 0.402793 | -0.18446 | 0.180884 | 0.064179 | -0.23684 |
| 0.331374 | 0.439453 | 0.403797 | -0.13365 | 0.102565 | -0.28607 | -0.0111  | -0.19687 | -0.33842 |
| -0.29177 | 0.273359 | 0.010409 | 0.13532  | 0.148467 | -0.18309 | 0.110475 | -0.09648 | -0.35174 |
| 0.001136 | -0.00712 | 0.003545 | 0.099659 | -0.04925 | -0.06982 | 0.10172  | 0.069479 | -0.37078 |
| -0.02649 | 0.34616  | 0.046443 | 0.011215 | 0.243855 | 0.029459 | 0.235082 | -0.17952 | -0.40422 |
| 0.300652 | 0.407151 | 0.125663 | 0.350776 | 0.345077 | -0.04317 | 0.327814 | -0.10633 | -0.38991 |
| -0.10159 | 0.262387 | -0.26858 | -0.11817 | 0.007178 | 0.004385 | 0.227097 | -0.46856 | -0.37653 |
| 0.006919 | 0.277327 | -0.00411 | -0.01123 | 0.1302   | -0.19691 | 0.057132 | -0.01264 | -0.47759 |
| 0.066034 | 0.282273 | 0.077389 | 0.018104 | 0.173152 | -0.25239 | 0.11665  | 0.106034 | -0.41675 |
| -0.26168 | 0.38709  | 0.001319 | -0.13436 | 0.100267 | 0.136021 | 0.362503 | -0.07174 | -0.20921 |
| -0.33835 | 0.413626 | -0.11037 | 0.056128 | -0.23532 | -0.07402 | -0.04989 | -0.36314 | -0.00671 |
| 0.152675 | -0.21222 | -0.26882 | -0.03505 | -0.39842 | 0.370135 | 0.243539 | -0.25835 | -0.4168  |
| -0.23024 | -0.02535 | -0.18621 | 0.134376 | -0.42765 | 0.18432  | 0.172164 | -0.1709  | -0.4219  |
| -0.0652  | -0.09871 | -0.30182 | 0.039409 | -0.42123 | 0.192593 | 0.064573 | -0.26592 | -0.44976 |
| 0.056369 | -0.14619 | -0.21031 | 0.121176 | -0.12453 | -0.07365 | 0.023765 | -0.06029 | -0.28368 |
| 0.068758 | -0.1968  | -0.14464 | 0.201827 | 0.009144 | 0.152661 | -0.11367 | 0.132141 | -0.32162 |
| -0.19012 | -0.03715 | -0.01531 | 0.067847 | -0.25943 | -0.00011 | 0.116393 | -0.16368 | -0.29755 |
| -0.15387 | 0.18181  | -0.14882 | 0.073256 | -0.30313 | 0.225903 | 0.235143 | -0.25919 | -0.31753 |
| -0.24354 | -0.03827 | -0.09181 | -0.08896 | -0.23955 | 0.270526 | -0.01845 | -0.22905 | -0.37973 |
| -0.25339 | 0.021716 | -0.06427 | -0.22589 | -0.14543 | -0.03576 | 0.118939 | -0.11636 | -0.45861 |
| -0.31069 | 0.023119 | -0.22577 | -0.12383 | -0.23805 | 0.002796 | 0.019635 | -0.26918 | -0.47823 |
| -0.01763 | -0.19763 | -0.08654 | 0.076844 | -0.19675 | -0.03396 | 0.208902 | -0.10267 | -0.25003 |
| -0.03969 | 0.062597 | -0.10727 | 0.193277 | -0.17201 | 0.127677 | 0.034097 | -0.00462 | -0.43631 |
| -0.24459 | 0.23962  | -0.06801 | 0.166903 | -0.09519 | -0.05327 | 0.255547 | -0.17754 | -0.48951 |
| -0.34015 | -0.07823 | -0.39337 | -0.28776 | -0.56679 | 0.275439 | 0.274932 | -0.39686 | -0.4851  |
| -0.14172 | 0.233695 | -0.04928 | -0.04435 | -0.12672 | -0.0458  | 0.386889 | 0.027712 | -0.19041 |
| -0.27037 | 0.210774 | -0.02053 | -0.24489 | -0.21034 | 0.058967 | 0.303567 | -0.3061  | -0.36574 |
| 0.04143  | 0.120565 | -0.17154 | -0.03799 | -0.08824 | -0.12628 | 0.310206 | 0.040287 | -0.08555 |
| 0.036799 | 0.053919 | 0.136026 | -0.00099 | 0.06028  | 0.017652 | 0.262425 | 0.155876 | 0.090875 |
| 0.086564 | 0.28991  | -0.02456 | 0.018463 | 0.117682 | 0.031857 | 0.237402 | -0.10517 | -0.39407 |
| -0.31872 | 0.067861 | -0.08781 | -0.17492 | -0.15786 | -0.05448 | 0.382396 | -0.26668 | -0.10888 |
| -0.01788 | 0.065449 | 0.059443 | 0.079967 | -0.05711 | -0.12671 | 0.294795 | 0.017748 | -0.13974 |
| -0.14582 | 0.047471 | -0.15759 | -0.37201 | -0.21956 | 0.269361 | 0.086488 | -0.17716 | -0.27692 |

|          |          |          |          |          |          |          |          |          |
|----------|----------|----------|----------|----------|----------|----------|----------|----------|
| -0.0238  | 0.230465 | 0.214625 | 0.227556 | 0.090157 | 0.012861 | 0.394817 | -0.11227 | -0.19086 |
| -0.27338 | 0.01814  | -0.18588 | 0.111206 | -0.13002 | -0.20478 | 0.418908 | -0.07793 | -0.19379 |
| -0.31495 | -0.22461 | -0.29758 | -0.06358 | -0.25569 | -0.09597 | 0.108293 | -0.16766 | -0.12855 |
| -0.01652 | -0.1841  | -0.54289 | -0.17228 | -0.49522 | 0.258352 | 0.225994 | -0.47261 | -0.4112  |
| -0.46064 | 0.343596 | -0.46698 | -0.31726 | -0.03832 | -0.55828 | -0.58015 | -0.11932 | -0.10011 |
| -0.30365 | 0.053401 | 0.082739 | -0.01667 | -0.23107 | -0.27841 | 0.360109 | -0.25249 | -0.19891 |
| -0.04458 | 0.193154 | -0.09418 | 0.025084 | 0.058784 | -0.39641 | 0.343834 | -0.09545 | -0.09101 |
| 0.158207 | -0.15683 | -0.27797 | 0.051597 | 0.105174 | -0.21284 | 0.227797 | -0.02098 | 0.196288 |
| 0.011328 | -0.29849 | -0.1132  | -0.09936 | 0.084841 | -0.11819 | 0.477794 | -0.26324 | 0.435283 |
| -0.04719 | 0.207659 | 0.057736 | -0.01319 | -0.21421 | -0.01985 | -0.0216  | 0.034105 | -0.26487 |
| 0.115712 | -0.08255 | -0.17533 | 0.015695 | 0.056425 | -0.1088  | 0.258351 | -0.11369 | 0.327408 |
| -0.14367 | 0.358382 | -0.12151 | -0.00411 | -0.32746 | 0.333872 | 0.247603 | -0.26474 | -0.16698 |
| 0.010049 | 0.016451 | -0.02774 | -0.06    | -0.16107 | 0.237883 | 0.052083 | -0.06492 | -0.055   |
| -0.11587 | 0.021403 | 0.01078  | -0.13047 | -0.29437 | 0.04652  | 0.110943 | -0.11125 | -0.34669 |
| -0.28096 | 0.293145 | -0.36653 | 0.234914 | -0.52739 | 0.331788 | 0.403796 | -0.39454 | -0.54347 |
| -0.03516 | 0.191869 | 0.123803 | 0.025439 | 0.082119 | 0.021569 | 0.112344 | -0.00737 | -0.3753  |
| -0.31488 | 0.127058 | 0.060307 | -0.15173 | -0.1412  | 0.225124 | 0.027765 | -0.10054 | -0.342   |
| -0.38101 | 0.1729   | -0.16165 | -0.21215 | -0.21747 | -0.02483 | 0.283907 | -0.31829 | -0.44644 |
| -0.07698 | 0.144564 | -0.13365 | -0.26163 | 0.012107 | 0.213612 | -0.01625 | -0.06054 | -0.41748 |
| -0.38615 | 0.268141 | 0.042911 | -0.20059 | -0.02752 | -0.05562 | 0.24771  | -0.28915 | -0.42061 |
| -0.04225 | 0.000209 | -0.03322 | -0.22205 | 0.023378 | 0.176706 | 0.179527 | -0.24904 | -0.4091  |
| -0.10937 | 0.170906 | 0.056084 | -0.17477 | 0.006899 | 0.004068 | 0.094272 | -0.17748 | -0.45297 |
| -0.01864 | 0.363793 | 0.045881 | 0.021643 | 0.128612 | -0.15159 | -0.11797 | -0.03594 | -0.53339 |
| 0.202947 | 0.336987 | 0.481082 | 0.41979  | 0.364157 | -0.03858 | 0.287662 | 0.0376   | -0.27367 |
| -0.02431 | 0.162813 | 0.177591 | -0.1501  | 0.004024 | 0.053861 | 0.122879 | -0.17088 | -0.35015 |
| -0.18393 | 0.153096 | 0.098449 | -0.20224 | -0.23129 | 0.181499 | -0.17568 | 0.221521 | -0.44522 |
| -0.29784 | 0.120533 | 0.007464 | -0.12386 | -0.07428 | 0.049607 | 0.184723 | -0.10997 | -0.45742 |
| -0.37483 | 0.291816 | -0.11808 | -0.19627 | 0.057865 | 0.138035 | 0.226963 | -0.23911 | -0.43991 |
| -0.1422  | 0.034587 | -0.11152 | -0.08436 | 0.115341 | 0.074315 | 0.108447 | -0.03054 | -0.41297 |
| -0.30349 | 0.05883  | -0.14331 | -0.32794 | -0.23517 | 0.115358 | 0.171075 | -0.2256  | -0.35132 |
| -0.13331 | 0.115585 | -0.37597 | -0.2379  | -0.47362 | 0.392727 | 0.442763 | -0.49215 | -0.47931 |
| -0.08383 | -0.14234 | -0.23136 | 0.044646 | -0.52938 | 0.465254 | 0.272129 | -0.50786 | -0.47016 |
| -0.05415 | -0.13106 | -0.4695  | -0.24889 | -0.61932 | 0.50599  | 0.369269 | -0.55598 | -0.56083 |
| -0.06319 | -0.23299 | -0.58832 | -0.26172 | -0.59535 | 0.514201 | 0.227737 | -0.57023 | -0.47697 |
| 0.035529 | -0.12555 | -0.28405 | 0.102872 | -0.3447  | 0.26565  | 0.272633 | -0.28764 | -0.44359 |

| TCGA-3A-A | TCGA-3A-A | TCGA-3A-A | TCGA-3A-A | TCGA-3A-A | TCGA-3A-A | TCGA-3A-A | TCGA-3A-A | TCGA-3A-A |
|-----------|-----------|-----------|-----------|-----------|-----------|-----------|-----------|-----------|
| 0.102425  | -0.08782  | 0.027532  | -0.34242  | -0.24996  | -0.12352  | 0.067982  | -0.00776  | 0.148569  |
| 0.350791  | 0.010723  | 0.354446  | -0.2567   | 0.067629  | -0.39144  | 0.43626   | -0.15487  | 0.010964  |
| -0.5601   | -0.3517   | 0.207921  | -0.27199  | -0.35712  | -0.3521   | -0.14528  | -0.38564  | -0.22028  |
| 0.050799  | -0.15017  | 0.433068  | -0.30913  | 0.492168  | 0.118635  | 0.003785  | -0.29448  | 0.40375   |
| -0.24423  | 0.016247  | 0.415383  | 0.060785  | -0.34588  | -0.33621  | -0.35066  | -0.32791  | -0.41503  |
| 0.188055  | 0.171696  | 0.136025  | 0.057011  | -0.2764   | -0.1138   | -0.04625  | -0.1567   | -0.24995  |
| 0.508569  | -0.10994  | -0.16912  | 0.427691  | 0.164144  | 0.043472  | 0.366985  | 0.23999   | 0.136521  |
| 0.177227  | 0.161703  | -0.04873  | -0.00676  | -0.18609  | -0.05967  | -0.063    | -0.15031  | -0.03604  |
| 0.130103  | 0.063456  | -0.04389  | -0.30547  | -0.35721  | -0.25612  | -0.2698   | -0.21568  | -0.19112  |
| 0.23534   | 0.181828  | -0.15537  | -0.1454   | -0.19972  | 0.062857  | -0.101    | -0.19284  | -0.21005  |
| 0.125951  | 0.272201  | -0.1092   | -0.23821  | -0.26068  | -0.13993  | -0.02036  | -0.04667  | -0.15794  |
| -0.02965  | 0.315254  | -0.31046  | -0.23036  | -0.17837  | 0.007141  | 0.041482  | -0.04151  | 0.064322  |
| 0.048677  | -0.0852   | 0.22815   | -0.06042  | 0.012756  | -0.01045  | 0.259332  | -0.15541  | 0.070165  |
| 0.116918  | 0.068846  | 0.220387  | -0.02325  | -0.42473  | -0.24687  | -0.24284  | -0.31946  | -0.19874  |
| -0.32321  | -0.2822   | 0.39211   | -0.22296  | -0.26819  | -0.33931  | -0.1473   | -0.64904  | -0.13265  |
| 0.059264  | -0.36577  | 0.531781  | 0.259057  | 0.055115  | 0.0993    | 0.418233  | 0.023666  | 0.287229  |
| 0.078614  | -0.08046  | -0.4272   | -0.09464  | 0.058668  | -0.01453  | 0.457441  | 0.166437  | -0.21057  |
| 0.0016    | 0.219933  | -0.01752  | -0.38792  | -0.3558   | 0.125452  | -0.09153  | -0.31719  | -0.19861  |
| 0.217963  | 0.185891  | -0.35277  | 0.022088  | 0.054366  | 0.055796  | 0.362424  | 0.316642  | 0.045449  |
| 0.109773  | -0.45208  | -0.19277  | 0.153631  | -0.30673  | -0.56919  | 0.076224  | -0.19371  | 0.008587  |
| -0.14466  | -0.44256  | -0.03244  | -0.02378  | -0.17422  | -0.35173  | 0.013567  | 0.021938  | -0.11393  |
| -0.24657  | -0.44087  | -0.0187   | -0.52025  | -0.45439  | -0.53544  | 0.134336  | -0.14143  | 0.070879  |
| -0.05792  | 0.20099   | -0.11552  | -0.04739  | -0.1177   | 0.109741  | 0.057016  | -0.26785  | -0.16847  |
| 0.102027  | 0.152527  | 0.298969  | -0.20754  | 0.076361  | -0.09365  | 0.260302  | -0.21736  | -0.00202  |
| 0.246911  | 0.192628  | 0.005218  | 0.383627  | 0.161922  | 0.228631  | 0.130723  | 0.1125    | 0.013519  |
| 0.351384  | 0.091759  | 0.284932  | 0.015082  | 0.200672  | 0.371883  | 0.007088  | -0.20597  | 0.018465  |
| -0.559    | -0.41199  | 0.142458  | -0.06154  | -0.22846  | -0.25306  | -0.15708  | -0.00688  | 0.059001  |
| -0.2436   | 0.293492  | -0.09629  | 0.214918  | 0.291656  | 0.295605  | 0.260453  | 0.213554  | 0.389526  |
| 0.090995  | 0.163225  | -0.1404   | 0.264943  | 0.022674  | -0.04562  | 0.318447  | -0.11388  | -0.00937  |
| -0.24529  | -0.10596  | 0.318679  | -0.4457   | -0.59523  | -0.45189  | -0.61613  | -0.43647  | -0.57252  |
| -0.27912  | 0.07609   | 0.087265  | -0.52511  | -0.44995  | -0.37864  | -0.61698  | -0.50793  | -0.59862  |
| -0.23718  | -0.068    | -0.32107  | -0.46223  | -0.42046  | -0.45595  | -0.4961   | -0.31597  | -0.51039  |
| -0.32487  | -0.26342  | 0.306285  | -0.16704  | -0.09424  | 0.072923  | -0.31313  | -0.20991  | -0.23041  |
| -0.33611  | -0.33333  | 0.32275   | -0.14463  | -0.12573  | 0.001329  | -0.32556  | -0.16678  | -0.237    |
| -0.33096  | -0.19356  | 0.313767  | -0.0977   | -0.04683  | 0.143159  | -0.22498  | -0.15387  | -0.20963  |
| -0.09729  | 0.153528  | 0.167371  | -0.28863  | -0.35408  | -0.43305  | -0.25364  | -0.22692  | -0.44221  |
| 0.264842  | -0.16735  | -0.47811  | 0.2846    | -0.30583  | -0.4438   | 0.248429  | 0.015302  | -0.25593  |
| 0.052181  | 0.222487  | 0.238572  | -0.22973  | -0.45247  | -0.41975  | -0.45699  | -0.12361  | -0.55925  |
| 0.197184  | -0.2135   | 0.542065  | -0.11573  | 0.148987  | -0.21698  | -0.24955  | -0.19425  | -0.2295   |
| 0.009338  | 0.224022  | 0.069191  | -0.0854   | -0.36101  | -0.40373  | -0.18408  | 0.069882  | -0.37099  |
| 0.044313  | -0.00284  | 0.377625  | -0.14247  | -0.2019   | -0.36304  | -0.14303  | -0.17523  | -0.34346  |
| 0.244089  | -0.01356  | 0.414801  | -0.39443  | -0.02414  | -0.34296  | -0.22229  | -0.29625  | -0.4976   |
| -0.01197  | 0.116117  | -0.36466  | -0.27174  | -0.30188  | -0.23037  | -0.02625  | 0.085156  | -0.2584   |
| 0.430491  | 0.383593  | -0.43692  | -0.25341  | -0.53737  | -0.54463  | -0.32082  | -0.1749   | -0.55514  |
| 0.11318   | -0.00729  | 0.094824  | 0.100208  | -9.98E-05 | 0.000557  | 0.125647  | 0.019045  | 0.133718  |
| 0.35787   | -0.04377  | 0.232433  | -0.28291  | -0.26638  | -0.25854  | -0.26771  | -0.20446  | -0.33008  |
| 0.573157  | 0.233308  | 0.00821   | 0.534682  | 0.116018  | 0.018399  | 0.257312  | 0.287318  | 0.087031  |
| 0.131811  | -0.18794  | -0.0118   | -0.02996  | -0.25193  | -0.14215  | 0.063772  | -0.07883  | -0.09519  |
| 0.185748  | -0.17559  | -0.01472  | -0.00355  | -0.25089  | -0.27797  | -0.14157  | -0.13791  | -0.1439   |

|          |          |          |          |          |          |          |          |          |
|----------|----------|----------|----------|----------|----------|----------|----------|----------|
| 0.223244 | -0.00851 | 0.178376 | -0.00348 | -0.41288 | -0.30868 | 0.039604 | -0.09255 | -0.1156  |
| 0.180706 | 0.331895 | 0.190558 | 0.020841 | 0.115732 | 0.019866 | 0.107665 | 0.044014 | -0.01771 |
| -0.11596 | -0.07095 | 0.38748  | -0.40528 | -0.27608 | -0.35709 | 0.048103 | -0.35927 | 0.004817 |
| 0.119824 | 0.303537 | -0.46484 | 0.01794  | -0.05957 | -0.4061  | 0.258314 | 0.222851 | -0.19144 |
| 0.00182  | -0.22451 | -0.36552 | -0.20941 | -0.09077 | -0.22032 | 0.068382 | -0.09829 | 0.090245 |
| 0.242598 | 0.072442 | 0.084019 | -0.24229 | -0.29339 | -0.26777 | -0.05792 | -0.21355 | -0.28751 |
| 0.255532 | 0.268502 | -0.2878  | 0.047675 | 0.230402 | -0.22062 | -0.05065 | 0.031181 | -0.23933 |
| 0.283289 | 0.268114 | 0.294621 | 0.174857 | 0.205465 | -0.02691 | 0.137679 | 0.242346 | -0.00204 |
| 0.312222 | 0.361156 | 0.495221 | -0.02802 | -0.01534 | -0.22813 | -0.12645 | -0.13202 | -0.13788 |
| 0.217625 | 0.040797 | -0.06211 | -0.1394  | -0.13319 | -0.23571 | 0.228743 | -0.08654 | -0.25335 |
| -0.0265  | 0.068973 | -0.11385 | 0.095372 | -0.33217 | -0.23813 | -0.06393 | -0.07175 | -0.23817 |
| 0.552152 | 0.41138  | -0.35418 | 0.13065  | 0.00863  | 0.12314  | -0.14761 | -0.34954 | -0.31237 |
| 0.016195 | 0.24298  | -0.23989 | 0.021187 | -0.01308 | -0.34561 | 0.057363 | -0.02377 | 0.050896 |
| 0.18502  | 0.272446 | -0.20637 | -0.08388 | -0.35197 | -0.39854 | -0.15972 | -0.51288 | -0.46622 |
| -0.04976 | 0.043046 | 0.393771 | -0.33882 | -0.14226 | -0.29583 | -0.18493 | -0.20602 | -0.4498  |
| 0.196497 | -0.23653 | 0.056246 | -0.32959 | -0.4667  | -0.41159 | -0.13418 | -0.23131 | -0.20595 |
| -0.12768 | -0.12485 | 0.653689 | -0.35822 | -0.27128 | 0.10468  | -0.35032 | -0.20646 | -0.2712  |
| 0.099459 | 0.064846 | 0.365163 | 0.084015 | 0.218404 | 0.123666 | 0.131084 | 0.043323 | 0.135077 |
| -0.32878 | -0.02138 | -0.00767 | -0.18904 | -0.12593 | -0.06537 | 0.029326 | -0.06696 | -0.09523 |
| 0.263944 | 0.241518 | -0.32809 | 0.20597  | -0.1918  | -0.19867 | 0.239914 | 0.029258 | -0.25872 |
| 0.382536 | -0.15915 | 0.197021 | 0.327536 | -0.14127 | -0.11395 | 0.402301 | -0.03481 | -0.13875 |
| 0.157963 | 0.256956 | -0.46382 | -0.12393 | -0.28538 | -0.41247 | 0.128392 | -0.12655 | -0.33061 |
| 0.069528 | 0.231273 | -0.27713 | 0.035541 | -0.16782 | -0.05722 | 0.09107  | 0.012672 | -0.14037 |
| 0.271105 | -0.33178 | 0.147529 | -0.35434 | -0.3326  | -0.63945 | -0.29021 | -0.30528 | -0.51804 |
| 0.561083 | 0.266726 | -0.29646 | 0.382006 | -0.01194 | 0.128057 | 0.352053 | 0.224469 | 0.19894  |
| 0.02295  | -0.17396 | 0.211417 | -0.21157 | 0.048515 | -0.00964 | -0.021   | -0.05253 | 0.003075 |
| 0.31054  | 0.036722 | 0.505788 | -0.02145 | -0.02149 | -0.29854 | -0.34527 | -0.30229 | -0.40787 |
| 0.346278 | -0.21048 | -0.6692  | 0.225839 | -0.45983 | -0.42708 | 0.063168 | 0.100882 | -0.30864 |
| -0.13605 | -0.06139 | -0.42499 | -0.08387 | -0.14791 | -0.18698 | -0.00221 | 0.177211 | -0.30703 |
| 0.182795 | 0.229735 | 0.241601 | -0.07911 | -0.29897 | -0.24823 | 0.188485 | 0.147074 | 0.220031 |
| 0.101926 | 0.245546 | 0.191465 | -0.19408 | -0.24438 | -0.25737 | -0.32272 | -0.21252 | -0.40556 |
| 0.061101 | 0.263603 | 0.222115 | -0.20818 | -0.23372 | -0.23529 | -0.2651  | -0.21404 | -0.41109 |
| 0.211064 | 0.157385 | 0.322123 | -0.25405 | -0.13475 | -0.18621 | -0.27965 | -0.11327 | -0.3395  |
| 0.244891 | -0.20236 | -0.17944 | -0.12981 | -0.47531 | -0.31863 | -0.05172 | 0.011706 | -0.10526 |
| 0.102482 | 0.184917 | 0.254897 | -0.00156 | 0.092119 | 0.185619 | 0.144938 | 0.160823 | 0.039204 |
| 0.664227 | 0.105647 | 0.163333 | 0.488582 | 0.197597 | 0.252383 | -0.28174 | -0.23402 | -0.50975 |
| 0.181176 | -0.32586 | 0.001504 | -0.0041  | -0.13007 | -0.18611 | -0.01026 | -0.13471 | 0.01853  |
| 0.451776 | -0.15624 | -0.14636 | 0.483671 | 0.116329 | 0.054802 | 0.251979 | 0.187775 | 0.19178  |
| 0.262552 | -0.43819 | -0.16619 | -0.09455 | -0.47221 | -0.58738 | -0.44192 | -0.38586 | -0.16051 |
| 0.141425 | -0.35414 | -0.32447 | 0.033679 | -0.06689 | -0.29236 | -0.17463 | 0.037773 | -0.16289 |
| 0.446668 | -0.53423 | 0.439659 | 0.059856 | -0.48427 | -0.4354  | -0.15423 | -0.15431 | -0.37595 |
| 0.40224  | -0.03212 | 0.019265 | 0.022297 | 0.018209 | 0.100306 | 0.509673 | 0.447574 | 0.038372 |
| -0.00713 | 0.131723 | 0.014045 | -0.04118 | -0.22499 | 0.099403 | -0.06948 | -0.03702 | -0.08306 |
| -0.05045 | 0.063763 | -0.08292 | -0.21251 | -0.34586 | -0.5361  | -0.41311 | -0.38218 | -0.37924 |
| 0.032749 | -0.33797 | -0.01779 | 0.097433 | -0.22775 | -0.35968 | 0.034051 | 0.071129 | 0.108431 |
| -0.08922 | -0.58444 | -0.10166 | 0.12381  | -0.44318 | -0.63397 | -0.28695 | -0.25929 | 0.209689 |
| 0.110977 | -0.37149 | -0.18979 | -0.2649  | -0.47104 | -0.53576 | -0.22064 | -0.3588  | 0.067084 |
| -0.25313 | -0.12207 | 0.087543 | -0.18438 | -0.17175 | -0.07222 | -0.22571 | -0.13837 | -0.17697 |
| -0.34485 | -0.30569 | 0.227142 | -0.26204 | -0.24344 | -0.23869 | -0.21455 | -0.23976 | -0.23874 |
| -0.31671 | -0.18583 | 0.209968 | 0.033578 | -0.03803 | 0.203446 | 0.032109 | -0.07243 | 0.026974 |

|          |          |          |          |          |          |          |          |          |
|----------|----------|----------|----------|----------|----------|----------|----------|----------|
| -0.25864 | -0.0209  | 0.157608 | -0.44713 | -0.31809 | -0.21099 | -0.43147 | -0.43185 | -0.45172 |
| -0.34907 | 0.050769 | -0.02878 | -0.33802 | -0.28095 | -0.21641 | -0.31157 | -0.26237 | -0.33744 |
| -0.34965 | -0.08596 | -0.14837 | -0.02005 | -0.17054 | 0.022275 | -0.09667 | -0.05075 | -0.13701 |
| -0.02086 | 0.058657 | 0.140115 | 0.166106 | 0.137579 | 0.277025 | 0.032767 | 0.055625 | -0.02296 |
| -0.11605 | -0.42052 | 0.186149 | -0.33601 | -0.46995 | -0.4927  | -0.38564 | -0.35918 | -0.08474 |
| -0.25527 | -0.33069 | 0.198707 | -0.0946  | -0.35176 | -0.34851 | -0.13891 | -0.10485 | -0.03502 |
| -0.00828 | -0.1655  | 0.164785 | -0.32092 | -0.44645 | -0.35899 | -0.37691 | -0.42919 | -0.31024 |
| -0.30168 | -0.20768 | 0.041799 | -0.08675 | -0.15452 | -0.27567 | 0.052564 | 0.028089 | 0.075877 |
| 0.080606 | 0.106527 | 0.241401 | 0.159337 | 0.147997 | 0.167237 | 0.051183 | 0.184802 | 0.008329 |
| -0.30968 | -0.1057  | -0.00897 | -0.29662 | -0.18835 | -0.21506 | -0.28483 | -0.21046 | -0.22756 |
| 0.199373 | 0.28926  | -0.21097 | -0.01718 | -0.19886 | -0.19435 | 0.049396 | 0.170245 | -0.10712 |
| -0.23992 | 0.034555 | 0.057697 | -0.18818 | -0.05088 | 0.016261 | -0.22733 | 0.005741 | -0.0451  |
| -0.32851 | -0.15224 | -0.04939 | -0.43967 | -0.4763  | -0.40809 | -0.40712 | -0.47891 | -0.45758 |
| -0.29348 | -0.11369 | 0.129102 | -0.18269 | 0.004629 | 0.131135 | -0.10697 | -0.05916 | -0.14824 |
| -0.21981 | -0.22159 | 0.135133 | -0.04701 | -0.28712 | -0.10334 | -0.19047 | -0.12403 | -0.08434 |
| -0.44226 | -0.39098 | 0.13548  | -0.34376 | -0.32245 | -0.2207  | -0.31599 | -0.32213 | -0.34963 |
| -0.28355 | -0.07991 | 0.188286 | -0.31793 | -0.08657 | -0.17294 | -0.3031  | -0.34203 | -0.34326 |
| -0.27181 | -0.18967 | 0.252289 | -0.20028 | 0.026513 | 0.117097 | -0.26487 | -0.23242 | -0.05121 |
| -0.23649 | -0.21287 | 0.278478 | -0.40281 | -0.33907 | -0.10435 | -0.30824 | -0.32431 | -0.30755 |
| -0.27995 | -0.12923 | 0.345188 | -0.21978 | -0.35489 | -0.2933  | -0.35918 | -0.15323 | -0.28658 |
| -0.27874 | -0.09089 | 0.068666 | -0.30339 | -0.31738 | -0.32339 | -0.29356 | -0.27565 | -0.33508 |
| -0.3836  | -0.28218 | 0.343822 | -0.46988 | -0.31494 | -0.25651 | -0.39692 | -0.38994 | -0.42533 |
| -0.34613 | -0.28079 | 0.432158 | -0.54211 | -0.29066 | -0.28057 | -0.42472 | -0.44977 | -0.49494 |
| -0.28972 | -0.23436 | 0.299754 | -0.34821 | -0.33837 | -0.25522 | -0.35304 | -0.39085 | -0.47392 |
| -0.42579 | -0.3278  | 0.073606 | -0.42141 | -0.32882 | -0.38038 | -0.38015 | -0.32953 | -0.33559 |
| -0.19258 | -0.22083 | 0.019247 | -0.36114 | -0.37435 | -0.3354  | -0.27031 | -0.38039 | -0.34947 |
| -0.31959 | -0.13768 | 0.209151 | -0.24123 | -0.23066 | -0.06422 | -0.21032 | -0.23131 | -0.1597  |
| 0.338699 | 0.236523 | 0.38245  | -0.32575 | -0.15829 | 0.017437 | -0.39086 | -0.44893 | -0.40077 |
| -0.40916 | -0.17354 | -0.18108 | -0.46393 | -0.41971 | -0.30339 | -0.26443 | -0.43106 | -0.41709 |
| -0.31565 | -0.03036 | -0.18985 | -0.39843 | -0.38499 | -0.27046 | -0.37261 | -0.331   | -0.44236 |
| -0.2936  | -0.27676 | -0.05286 | -0.39656 | -0.38488 | -0.39759 | -0.24192 | -0.43164 | -0.38691 |
| -0.14765 | 0.010098 | -0.28935 | -0.31974 | -0.26072 | -0.22487 | -0.24221 | -0.26967 | -0.31053 |
| 0.098501 | 0.011801 | -0.34266 | -0.27446 | -0.30137 | -0.19207 | -0.30075 | -0.29806 | -0.28677 |
| -0.36361 | -0.14802 | 0.044802 | -0.35463 | -0.16968 | -0.14598 | -0.3043  | -0.25    | -0.26252 |
| -0.36413 | -0.04539 | 0.038765 | -0.47858 | -0.24369 | -0.2033  | -0.42725 | -0.48411 | -0.48324 |
| -0.41147 | -0.14536 | 0.020934 | -0.43592 | -0.45126 | -0.3401  | -0.34386 | -0.44427 | -0.41425 |
| -0.43606 | -0.31091 | -0.08713 | -0.38997 | -0.43404 | -0.41101 | -0.33029 | -0.24115 | -0.36067 |
| -0.35581 | -0.1918  | -0.11624 | -0.46534 | -0.48272 | -0.45824 | -0.39855 | -0.39796 | -0.41451 |
| -0.34517 | -0.09939 | -0.1702  | -0.24782 | -0.30235 | -0.21283 | -0.11348 | -0.13802 | -0.21622 |
| -0.25535 | -0.01309 | -0.02408 | -0.41707 | -0.39417 | -0.36042 | -0.41097 | -0.3826  | -0.45144 |
| -0.2857  | -0.29304 | 0.24632  | -0.51349 | -0.40967 | -0.37577 | -0.37146 | -0.51332 | -0.46759 |
| -0.50447 | -0.11128 | 0.05472  | -0.59432 | -0.43484 | -0.33997 | -0.52803 | -0.40963 | -0.52042 |
| -0.42291 | -0.29942 | 0.112836 | -0.20979 | -0.2175  | -0.15844 | -0.02606 | -0.09844 | -0.09757 |
| -0.44639 | -0.19719 | 0.155366 | -0.40265 | -0.38098 | -0.36635 | -0.31501 | -0.2069  | -0.34655 |
| -0.24866 | -0.07957 | -0.02503 | -0.08031 | 0.043749 | 0.119538 | 0.108992 | 0.01547  | 0.166442 |
| -0.06891 | 0.212185 | 0.032772 | 0.128167 | 0.145134 | 0.22473  | 0.129558 | 0.23639  | -0.04535 |
| -0.35222 | -0.21005 | 0.278863 | -0.37626 | -0.28622 | -0.26054 | -0.37531 | -0.33954 | -0.3789  |
| -0.22485 | -0.1351  | 0.065396 | -0.1929  | -0.19255 | -0.06453 | -0.17457 | -0.0627  | -0.08972 |
| -0.36388 | -0.09756 | -0.08159 | -0.14934 | -0.25517 | -0.12346 | -0.00713 | -0.07595 | -0.10405 |
| -0.28455 | -0.33997 | 0.29158  | -0.14009 | -0.16378 | -0.16279 | -0.06036 | -0.20444 | 0.023475 |

|          |          |          |          |          |          |          |          |          |
|----------|----------|----------|----------|----------|----------|----------|----------|----------|
| -0.35515 | -0.14955 | 0.242735 | -0.12151 | -0.16086 | 0.047247 | -0.13684 | -0.12441 | -0.11688 |
| -0.24341 | 0.032095 | -0.06315 | -0.13894 | -0.23802 | 0.13088  | -0.06254 | -0.2274  | -0.02406 |
| -0.173   | -0.18957 | 0.09364  | 0.086653 | 0.051382 | 0.101827 | 0.039737 | 0.102004 | 0.233948 |
| -0.44899 | -0.25783 | -0.1507  | -0.46581 | -0.42431 | -0.14745 | -0.46612 | -0.46497 | -0.40913 |
| 0.594392 | 0.545653 | -0.36323 | 0.347553 | 0.301276 | 0.385847 | 0.0469   | 0.227386 | 0.004189 |
| -0.24435 | -0.04581 | 0.08676  | -0.22405 | -0.20782 | -0.06697 | -0.14707 | -0.35065 | -0.07278 |
| -0.3412  | -0.2105  | 0.152319 | 0.097395 | -0.00315 | 0.021433 | 0.125616 | 0.01272  | 0.038513 |
| 0.341476 | 0.073889 | 0.015471 | 0.294479 | -0.16811 | -0.15771 | -0.05722 | -0.0661  | -0.17582 |
| 0.527588 | 0.181331 | -0.11276 | 0.473676 | 0.009374 | 0.023904 | 0.133446 | 0.152312 | -0.07527 |
| -0.03559 | -0.15044 | 0.085483 | -0.14732 | -0.48207 | -0.40216 | -0.32025 | -0.14835 | -0.34179 |
| 0.370981 | 0.123821 | 0.023299 | 0.333709 | -0.05487 | -0.03911 | 0.044998 | 0.055008 | -0.00899 |
| 0.107481 | -0.17877 | 0.057178 | -0.18506 | -0.1053  | 0.130015 | -0.30088 | -0.16288 | -0.26783 |
| 0.317904 | 0.049988 | 0.06435  | -0.05841 | -0.09217 | -0.04156 | 0.104179 | -0.20496 | -0.01628 |
| -0.16247 | -0.1039  | -0.10039 | -0.08383 | -0.24035 | -0.3712  | -0.05233 | -0.317   | -0.16663 |
| -0.43079 | -0.01643 | 0.142388 | -0.62155 | -0.51433 | -0.47745 | -0.57607 | -0.54985 | -0.60029 |
| -0.34767 | -0.28433 | 0.182646 | -0.40838 | -0.3223  | -0.27489 | -0.38766 | -0.41417 | -0.36333 |
| -0.4223  | -0.31107 | 0.09863  | -0.28707 | -0.36363 | -0.24548 | -0.42587 | -0.32668 | -0.30517 |
| -0.36542 | -0.33578 | 0.24958  | -0.37211 | -0.27226 | -0.28454 | -0.34613 | -0.24429 | -0.34891 |
| -0.40916 | -0.26596 | 0.169817 | -0.43854 | -0.44089 | -0.34237 | -0.45951 | -0.45633 | -0.43692 |
| -0.49667 | -0.24231 | 0.311666 | -0.30665 | -0.36043 | -0.27159 | -0.46851 | -0.2758  | -0.44491 |
| -0.35568 | -0.27652 | 0.294666 | -0.40335 | -0.27538 | -0.3037  | -0.36961 | -0.3085  | -0.37812 |
| -0.41663 | -0.19556 | 0.092963 | -0.39948 | -0.37864 | -0.34805 | -0.41817 | -0.38654 | -0.4155  |
| -0.37857 | -0.38756 | -0.13468 | -0.39703 | -0.42675 | -0.33181 | -0.43314 | -0.47276 | -0.40503 |
| -0.30315 | -0.08529 | 0.311772 | -0.29825 | -0.08842 | 0.02515  | -0.4261  | -0.37932 | -0.32672 |
| -0.30654 | -0.13907 | 0.340797 | -0.35159 | -0.14128 | -0.22592 | -0.39202 | -0.23142 | -0.33665 |
| -0.25524 | -0.2004  | 0.230965 | -0.49479 | -0.33464 | -0.23043 | -0.40523 | -0.36262 | -0.3669  |
| -0.40078 | -0.39328 | 0.209251 | -0.47162 | -0.37786 | -0.34398 | -0.42621 | -0.40055 | -0.41009 |
| -0.49309 | -0.18052 | 0.063094 | -0.47253 | -0.29723 | -0.30323 | -0.45279 | -0.47863 | -0.46248 |
| -0.33333 | -0.29156 | 0.139359 | -0.44424 | -0.3697  | -0.29119 | -0.45266 | -0.49813 | -0.44035 |
| -0.35067 | -0.18617 | 0.155125 | -0.38243 | -0.27139 | -0.25502 | -0.34909 | -0.40621 | -0.34538 |
| -0.5532  | -0.03214 | -0.08516 | -0.50635 | -0.09979 | 0.008617 | -0.43209 | -0.47702 | -0.44111 |
| -0.59025 | -0.11314 | -0.12781 | -0.56529 | -0.3194  | -0.14605 | -0.4395  | -0.47651 | -0.49415 |
| -0.65846 | -0.32094 | -0.1143  | -0.64294 | -0.41469 | -0.35017 | -0.52267 | -0.52969 | -0.55448 |
| -0.61032 | -0.25171 | -0.14122 | -0.6528  | -0.49556 | -0.23449 | -0.56845 | -0.59558 | -0.62265 |
| -0.47941 | -0.28126 | -0.00164 | -0.5447  | -0.4581  | -0.30344 | -0.55865 | -0.52337 | -0.51975 |



| TCGA-3A-A | TCGA-3A-A | TCGA-3A-A | TCGA-3E-A | TCGA-3E-A | TCGA-F2-7 | TCGA-F2-7 | TCGA-F2-A | TCGA-FB-A |
|-----------|-----------|-----------|-----------|-----------|-----------|-----------|-----------|-----------|
| 0.177036  | 0.00464   | 0.081732  | -0.42529  | -0.30172  | -0.06422  | -0.03032  | 0.130082  | -0.07966  |
| 0.005801  | 0.374241  | 0.540625  | -0.13973  | -0.61214  | 0.235017  | 0.247337  | 0.554963  | 0.101743  |
| -0.13266  | -0.05329  | 0.011573  | -0.48507  | 0.169546  | 0.251121  | 0.034877  | -0.27943  | -0.34705  |
| 0.068405  | 0.094484  | 0.010635  | 0.00829   | -0.18155  | 0.256104  | 0.181028  | 0.496058  | 0.361487  |
| -0.46945  | 0.141897  | -0.18716  | -0.17928  | 0.077617  | -0.01453  | -0.02325  | 0.340815  | 0.369341  |
| -0.10229  | 0.01294   | 0.143676  | 0.019234  | 0.188322  | 0.025984  | 0.204801  | 0.171948  | 0.153281  |
| 0.44778   | -0.51446  | 0.205917  | -0.46164  | -0.16598  | -0.44584  | -0.37356  | -0.13131  | -0.4295   |
| -0.1873   | -0.07927  | 0.195212  | -0.00044  | 0.280576  | -0.21466  | -0.10403  | 0.114456  | 0.106349  |
| -0.1016   | 0.194763  | 0.138171  | -0.02939  | 0.167183  | -0.13129  | 0.009297  | 0.355855  | -0.11475  |
| -0.08407  | 0.120612  | 0.114374  | 0.228193  | -0.13371  | -0.02528  | -0.21534  | 0.270829  | 0.317943  |
| -0.16286  | -0.02552  | 0.352034  | -0.05586  | -0.02638  | -0.27893  | -0.33006  | 0.202194  | -0.10087  |
| 0.031537  | -0.0643   | 0.46995   | -0.13906  | -0.17412  | -0.25583  | -0.17321  | 0.505224  | 0.018964  |
| 0.001348  | -0.0389   | 0.079327  | -0.06257  | 0.055902  | 0.198416  | 0.160959  | -0.04632  | -0.11839  |
| -0.30341  | -0.25361  | -0.17614  | -0.20673  | -0.07076  | -0.05751  | -0.31049  | 0.070336  | 0.084295  |
| -0.50557  | 0.134607  | -0.15779  | 0.144079  | -0.00184  | 0.113186  | 0.033182  | 0.104485  | 0.412574  |
| 0.252142  | 0.205285  | -0.03331  | -0.36989  | -0.40768  | 0.306527  | 0.262542  | 0.358269  | 0.42272   |
| 0.061554  | -0.36292  | 0.157512  | -0.14777  | -0.10071  | -0.13016  | -0.08981  | 0.104722  | -0.03403  |
| -0.0424   | -0.25589  | 0.164565  | 0.142664  | -0.37798  | 0.097016  | -0.06062  | 0.148331  | 0.085749  |
| 0.051187  | -0.33649  | -0.00886  | 0.471353  | -0.54932  | 0.124368  | -0.09846  | 0.298366  | -0.21451  |
| -0.21482  | -0.44506  | 0.256279  | -0.04925  | -0.01614  | -0.52274  | -0.40167  | 0.186718  | -0.49858  |
| -0.06487  | -0.02947  | -0.11065  | -0.28037  | 0.056288  | -0.07381  | 0.106514  | -0.15151  | -0.34242  |
| -0.13052  | 0.39071   | 0.312835  | 0.200354  | 0.19445   | -0.25255  | 0.112865  | -0.25888  | -0.50393  |
| 0.048034  | -0.24715  | -0.20299  | 0.151561  | -0.1274   | -0.19886  | -0.27743  | -0.21463  | -0.05871  |
| -0.05292  | 0.144855  | -0.02808  | 0.172758  | -0.42137  | 0.331323  | 0.090493  | 0.450662  | 0.279891  |
| 0.029186  | -0.19924  | -0.00926  | 0.245     | 0.438088  | -0.31261  | -0.22773  | 0.015371  | 0.094151  |
| 0.228712  | 0.246482  | -0.2586   | 0.169041  | -0.018    | 0.068431  | 0.095311  | 0.090068  | 0.180181  |
| 0.319385  | -0.19185  | 0.256529  | -0.0349   | -0.20464  | 0.283673  | 0.049484  | -0.23239  | -0.38334  |
| 0.219887  | 0.139793  | -0.06992  | 0.219862  | 0.152558  | 0.111516  | 0.076824  | -0.22038  | 0.129571  |
| -0.04186  | 0.470538  | -0.50272  | 0.40668   | 0.210275  | 0.166953  | 0.287538  | 0.424078  | 0.375159  |
| -0.5224   | 0.254229  | -0.08369  | -0.01818  | -0.15533  | 0.114467  | 0.339636  | -0.20426  | 0.26489   |
| -0.41628  | 0.396033  | -0.32013  | 0.531684  | -0.50848  | 0.540234  | 0.549214  | 0.476882  | 0.56016   |
| -0.4988   | 0.43782   | -0.29806  | 0.406166  | -0.39393  | 0.023394  | 0.331487  | -0.12529  | 0.726541  |
| -0.14589  | 0.066376  | 0.062276  | -0.04402  | 0.431114  | 0.165521  | 0.268006  | -0.01872  | 0.126132  |
| -0.18241  | -0.01557  | 0.139617  | -0.24204  | 0.427767  | 0.272404  | 0.322428  | -0.03397  | 0.095811  |
| -0.06229  | 0.183802  | -0.02102  | -0.05625  | 0.369224  | 0.305891  | 0.358974  | 0.081036  | 0.249176  |
| -0.22785  | -0.31659  | 0.306402  | -0.01586  | -0.0776   | -0.2155   | -0.13722  | 0.022886  | 0.18528   |
| 0.279159  | -0.20201  | 0.126553  | 0.391231  | 0.383778  | -0.04483  | 0.214524  | 0.573084  | -0.04688  |
| -0.35194  | -0.38045  | 0.387647  | -0.10565  | -0.12958  | -0.1366   | -0.29667  | 0.240309  | -0.22511  |
| 0.064172  | -0.08923  | 0.38215   | -0.31331  | -0.20526  | 0.201643  | 0.067472  | -0.26598  | -0.20737  |
| -0.14919  | -0.52626  | 0.311754  | -0.14977  | -0.36088  | -0.23502  | -0.34082  | -0.06349  | 0.107289  |
| -0.19038  | -0.5429   | 0.337854  | -0.18497  | -0.44706  | 0.168574  | 0.038634  | 0.23065   | 0.321902  |
| 0.034813  | 0.036891  | 0.166641  | -0.07054  | 0.208671  | -0.01118  | 0.174394  | -0.24741  | -0.16626  |
| -0.08362  | 0.20359   | 0.045061  | 0.324615  | -0.01844  | 0.108014  | 0.251812  | 0.194046  | 0.203935  |
| -0.31418  | -0.23873  | 0.307486  | -0.00877  | -0.07852  | -0.23909  | 0.069385  | -0.10946  | 0.22749   |
| 0.090175  | 0.46996   | -0.40643  | 0.23738   | -0.5708   | 0.375491  | 0.409676  | 0.196324  | -0.07429  |
| -0.18624  | -0.13867  | 0.101998  | -0.08241  | -0.29902  | -0.02981  | -0.01358  | -0.16925  | -0.14045  |
| 0.137922  | -0.40994  | -0.09385  | 0.521618  | 0.395827  | -0.55203  | -0.47215  | 0.283918  | -0.18847  |
| -0.05494  | -0.19753  | -0.0312   | -0.08822  | 0.211237  | -0.03948  | -0.02607  | 0.021131  | 0.070415  |
| -0.26226  | -0.40997  | 0.083451  | -0.23239  | 0.145146  | -0.3414   | -0.32634  | -0.02747  | 0.001918  |

|          |          |          |          |          |          |          |          |          |
|----------|----------|----------|----------|----------|----------|----------|----------|----------|
| 0.150124 | -0.19939 | 0.070796 | 0.141401 | -0.05698 | -0.07681 | -0.15437 | 0.351001 | 0.087028 |
| 0.099006 | 0.461795 | -0.16032 | 0.219407 | -0.10135 | 0.457146 | 0.271527 | 0.47648  | 0.143068 |
| -0.11243 | -0.03946 | 0.061265 | 0.167489 | 0.10114  | 0.280529 | 0.161438 | 0.151071 | -0.20699 |
| 0.177664 | -0.03107 | 0.204845 | 0.17828  | 0.034736 | 0.014793 | 0.138323 | 0.360103 | 0.165251 |
| 0.063915 | 0.1162   | -0.14181 | -0.30867 | 0.256455 | 0.218648 | 0.330314 | 0.304086 | -0.24463 |
| -0.07215 | -0.12885 | -0.04356 | 0.144082 | 0.208015 | -0.0664  | 0.019507 | 0.209371 | 0.100272 |
| -0.10507 | -0.04942 | 0.249538 | 0.089346 | 0.175549 | -0.3056  | -0.10745 | -0.24814 | 0.065367 |
| -0.14276 | -0.11619 | 0.356252 | 0.160027 | 0.176112 | -0.28002 | -0.21787 | -0.02421 | 0.196083 |
| -0.22719 | 0.118477 | -0.0079  | 0.322007 | 0.344548 | -0.15094 | -0.01309 | 0.277223 | 0.298795 |
| -0.05769 | 0.159074 | 0.071048 | 0.24935  | 0.003673 | 0.240359 | 0.310863 | 0.358703 | 0.375085 |
| -0.05326 | 0.240203 | -0.19137 | 0.499634 | 0.089297 | 0.385152 | 0.317047 | 0.325773 | 0.128977 |
| -0.1415  | 0.511966 | 0.227835 | 0.56601  | -0.44915 | 0.418656 | 0.475131 | 0.349751 | 0.469884 |
| -0.19982 | 0.130476 | 0.242564 | 0.174815 | -0.08633 | -0.04962 | -0.01587 | 0.345689 | -0.193   |
| -0.33503 | -0.01503 | 0.193018 | 0.390167 | -0.26171 | -0.03269 | -0.08471 | 0.170522 | 0.14091  |
| -0.00668 | -0.09733 | 0.321193 | -0.29587 | -0.20584 | 0.159226 | 0.044269 | -0.00674 | -0.0669  |
| -0.10303 | -0.31327 | 0.173326 | -0.09935 | -0.4294  | -0.01903 | 0.023158 | 0.220294 | 0.000808 |
| -0.18    | -0.22222 | 0.225049 | -0.28691 | -0.06761 | 0.182442 | 0.135895 | 0.553588 | 0.506093 |
| 0.117518 | 0.026849 | -0.06299 | -0.20364 | -0.30284 | 0.089776 | 0.048491 | 0.330873 | 0.14703  |
| 0.06713  | 0.271694 | -0.11642 | -0.09602 | 0.200325 | 0.241422 | 0.231194 | 0.102642 | 0.174335 |
| 0.08452  | -0.38262 | 0.129981 | 0.180117 | -0.02625 | -0.14737 | -0.09154 | 0.242606 | 0.313749 |
| 0.368582 | -0.24987 | 0.35282  | 0.074577 | 0.11453  | -0.28647 | -0.05128 | 0.547475 | 0.224861 |
| -0.01035 | 0.04921  | 0.277034 | 0.175775 | 0.191488 | 0.223742 | 0.337207 | 0.339228 | 0.075144 |
| 0.165852 | -0.17698 | 0.238139 | 0.025591 | 0.108462 | -0.13385 | 0.061859 | 0.146235 | -0.00039 |
| -0.23795 | -0.42566 | 0.261852 | -0.17541 | 0.35395  | -0.44523 | -0.32144 | 0.237241 | 0.111922 |
| 0.156136 | -0.56243 | 0.29535  | -0.01151 | -0.4203  | -0.59127 | -0.24553 | -0.22057 | 0.206101 |
| 0.125564 | -0.11807 | 0.161065 | -0.15148 | -0.30088 | -0.13597 | -0.08833 | -0.18843 | -0.06548 |
| 0.044668 | -0.28038 | 0.223724 | -0.03765 | -0.00867 | -0.27109 | -0.12881 | -0.1087  | -0.0985  |
| -0.30591 | -0.52125 | 0.510766 | 0.272485 | 0.537779 | -0.60396 | -0.19729 | -0.39772 | 0.157098 |
| -0.09667 | 0.048867 | -0.27824 | 0.374093 | 0.399941 | -0.13307 | -0.21519 | -0.05782 | 0.146372 |
| -0.21271 | -0.02621 | -0.3686  | 0.278397 | -0.57501 | -0.065   | -0.1342  | 0.506262 | 0.090175 |
| -0.23811 | 0.015113 | 0.208161 | 0.17921  | 0.083648 | -0.05944 | -0.22953 | -0.20288 | -0.15033 |
| -0.23463 | 0.111178 | 0.0572   | 0.283207 | 0.11049  | -0.00777 | -0.18951 | -0.17408 | -0.06027 |
| -0.09656 | -0.3456  | 0.023354 | -0.23975 | 0.176426 | -0.33871 | -0.36496 | -0.24663 | -0.26222 |
| -0.15972 | -0.36865 | 0.159893 | -0.57818 | -0.06805 | -0.22097 | -0.01317 | -0.14128 | 0.190859 |
| 0.121374 | 0.008523 | 0.028572 | 0.249197 | -0.28522 | 0.162574 | -0.03549 | 0.12076  | 0.046255 |
| -0.55669 | 0.330781 | 0.030307 | 0.091366 | 0.647892 | -0.45738 | -0.45763 | -0.21002 | -0.12593 |
| -0.09786 | -0.26811 | -0.04274 | -0.14348 | 0.160678 | -0.19478 | -0.18195 | -0.35025 | -0.14934 |
| -0.10709 | -0.15351 | 0.028577 | -0.23546 | 0.441926 | -0.24614 | -0.06358 | 0.103089 | -0.06225 |
| -0.41807 | -0.54297 | 0.511312 | -0.10605 | 0.071813 | -0.61534 | -0.62485 | -0.34862 | 0.104679 |
| -0.3845  | 0.105253 | 0.152041 | 0.11096  | 0.191114 | -0.38557 | 0.013594 | -0.35385 | 0.015712 |
| -0.46009 | -0.4817  | 0.213712 | 0.421602 | -0.26459 | -0.54394 | -0.16151 | -0.46123 | 0.225355 |
| 0.501089 | -0.09153 | -0.34162 | -0.14488 | -0.20062 | 0.044664 | 0.292913 | -0.07519 | -0.29808 |
| -0.05212 | -0.01302 | 0.209023 | 0.054804 | -0.23818 | 0.064762 | 0.168247 | -0.12375 | 0.235184 |
| -0.33932 | -0.50952 | 0.36851  | 0.004564 | 0.227465 | -0.66539 | -0.64631 | -0.2779  | 0.265317 |
| 0.129393 | -0.35818 | 0.136192 | -0.13426 | 0.105616 | -0.46933 | -0.45528 | -0.2717  | -0.21892 |
| -0.18684 | -0.47679 | 0.357102 | 0.153541 | 0.122626 | -0.54952 | -0.49144 | -0.1902  | -0.14932 |
| -0.24077 | -0.56783 | 0.490901 | 0.082001 | 0.169785 | -0.54592 | -0.54148 | -0.40815 | -0.22119 |
| -0.11749 | 0.274148 | -0.05515 | -0.08282 | -0.04627 | 0.307772 | 0.329357 | 0.099348 | 0.144684 |
| -0.22596 | 0.228629 | -0.20704 | -0.29294 | -0.04753 | 0.429263 | 0.310308 | -0.03253 | 0.015004 |
| 0.118403 | 0.24849  | -0.14291 | 0.064531 | 0.244482 | 0.308112 | 0.258231 | -0.01436 | 0.299236 |

|          |          |          |          |          |          |          |          |          |
|----------|----------|----------|----------|----------|----------|----------|----------|----------|
| -0.43195 | 0.441892 | -0.11233 | 0.338229 | -0.29269 | 0.305627 | 0.362989 | 0.244677 | 0.388846 |
| -0.30005 | 0.390512 | -0.20585 | 0.231794 | -0.27783 | 0.387692 | 0.452232 | 0.201213 | 0.406219 |
| -0.0181  | 0.169946 | 0.029018 | -0.04153 | 0.343238 | 0.144976 | 0.212416 | -0.12069 | 0.266082 |
| 0.086097 | 0.285934 | -0.22029 | 0.220114 | 0.027306 | 0.309156 | 0.281503 | 0.165138 | 0.312462 |
| -0.1037  | -0.25488 | 0.177474 | -0.27552 | 0.149379 | -0.25324 | -0.17531 | -0.32228 | 0.06383  |
| -0.0677  | -0.07646 | 0.060816 | -0.21512 | 0.206665 | 0.049952 | 0.093505 | -0.12311 | 0.259737 |
| -0.28728 | -0.20889 | 0.018215 | -0.22856 | 0.02439  | -0.13294 | -0.12339 | -0.17534 | 0.200459 |
| -0.03955 | -0.03002 | -0.09252 | -0.3513  | -0.02234 | -0.02462 | 0.117762 | -0.20012 | -0.18942 |
| 0.422966 | -0.0853  | 0.108439 | 0.208957 | 0.269005 | 0.123561 | 0.188166 | 0.087089 | -0.00908 |
| -0.27504 | 0.141744 | -0.03639 | -0.09848 | 0.037841 | 0.156773 | 0.174375 | 0.040084 | 0.030456 |
| -0.23731 | -0.13731 | 0.129341 | 0.158855 | -0.27912 | -0.40843 | -0.32582 | -0.15277 | -0.06889 |
| -0.02351 | -0.04338 | 0.095423 | -0.29274 | 0.048561 | 0.281159 | 0.287142 | 0.092231 | 0.097971 |
| -0.44712 | 0.219144 | -0.26407 | 0.00628  | -0.35198 | 0.194773 | 0.305974 | -0.07591 | 0.177513 |
| 0.034581 | 0.287153 | -0.05354 | -0.01661 | 0.308786 | 0.319143 | 0.32802  | 0.216305 | 0.301764 |
| -0.16795 | 0.140449 | 0.077658 | -0.28357 | 0.206632 | 0.246232 | 0.182107 | -0.03052 | 0.043708 |
| -0.23019 | 0.250588 | 0.058106 | -0.25953 | -0.28801 | 0.617508 | 0.511225 | 0.187029 | -0.08711 |
| -0.26334 | 0.15624  | 0.090712 | 0.10382  | -0.01805 | 0.174506 | -0.11139 | 0.314139 | -0.12137 |
| -0.14584 | 0.243438 | 0.208175 | -0.06952 | 0.243776 | 0.295533 | 0.026625 | 0.016825 | 0.032282 |
| -0.17278 | 0.373634 | -0.00542 | -0.09876 | 0.054484 | 0.420075 | 0.411241 | 0.136728 | 0.18906  |
| -0.22184 | 0.193958 | -0.14831 | -0.07779 | -0.11869 | 0.301109 | 0.285368 | -0.15015 | 0.012139 |
| -0.3103  | 0.117996 | 0.162794 | -0.17868 | -0.11785 | 0.191527 | 0.297114 | 0.137813 | 0.184139 |
| -0.32368 | 0.306307 | 0.003983 | -0.2574  | 0.202035 | 0.429424 | 0.436885 | 0.228846 | 0.145334 |
| -0.31662 | 0.29967  | 0.137733 | -0.16816 | 0.313984 | 0.379256 | 0.381035 | 0.381876 | 0.258332 |
| -0.43679 | 0.443077 | -0.31694 | 0.308429 | -0.3496  | 0.483972 | 0.478058 | 0.280213 | 0.467213 |
| -0.34111 | 0.182723 | 0.18601  | -0.4272  | 0.156084 | 0.343272 | 0.424424 | -0.1106  | -0.19569 |
| -0.39334 | -0.00795 | 0.164796 | -0.22979 | 0.162324 | 0.180212 | 0.243716 | 0.039766 | -0.14559 |
| 0.015481 | 0.277218 | -0.17172 | -0.12508 | 0.02573  | 0.373076 | 0.387753 | 0.00592  | 0.240953 |
| -0.03236 | 0.32141  | -0.30346 | 0.407484 | -0.41448 | 0.536503 | 0.514884 | 0.307648 | 0.403685 |
| -0.30113 | 0.20396  | -0.05521 | 0.317635 | -0.57005 | 0.326897 | 0.289981 | -0.08074 | 0.478203 |
| -0.43648 | 0.331856 | 0.058124 | 0.187812 | -0.48306 | 0.361714 | 0.406568 | 0.300133 | 0.244445 |
| -0.44933 | 0.416397 | -0.01154 | 0.180581 | -0.52277 | 0.235942 | 0.438953 | 0.214348 | -0.08807 |
| -0.24909 | 0.121222 | 0.220347 | 0.258806 | -0.31304 | -0.05632 | 0.072942 | -0.25799 | 0.086118 |
| -0.38777 | 0.175382 | 0.187649 | 0.381973 | -0.011   | -0.18023 | 0.101532 | -0.04167 | 0.285857 |
| -0.29454 | 0.455982 | -0.10916 | 0.154978 | -0.16239 | 0.342831 | 0.372514 | 0.077003 | 0.376869 |
| -0.46147 | 0.424364 | -0.24366 | 0.301458 | -0.3152  | 0.359045 | 0.475302 | 0.293305 | 0.533025 |
| -0.30948 | 0.25     | 0.133128 | -0.08781 | -0.37431 | 0.307415 | 0.348358 | -0.09568 | 0.397773 |
| -0.40997 | 0.334983 | -0.06015 | -0.1887  | -0.31908 | 0.410499 | 0.481341 | -0.12206 | 0.282567 |
| -0.40333 | 0.438156 | -0.10797 | -0.13315 | -0.32112 | 0.423005 | 0.518849 | 0.027397 | 0.469694 |
| -0.20268 | 0.25087  | 0.167151 | -0.2623  | -0.22795 | 0.330242 | 0.303968 | 0.235749 | 0.187032 |
| -0.31007 | 0.215649 | 0.001436 | 0.060046 | -0.16118 | 0.193409 | 0.328272 | 0.174155 | 0.23448  |
| -0.47766 | 0.286982 | -0.2044  | 0.065075 | -0.25816 | 0.346488 | 0.460329 | 0.133196 | 0.338949 |
| -0.55701 | 0.530049 | -0.48866 | 0.443726 | -0.41147 | 0.504953 | 0.455866 | 0.13007  | 0.618647 |
| 0.032599 | 0.143604 | -0.04894 | -0.28526 | 0.074875 | 0.333128 | 0.240852 | -0.17994 | 0.208716 |
| -0.2371  | 0.256153 | -0.10874 | -0.23228 | -0.12217 | 0.351559 | 0.392451 | 0.037966 | 0.229165 |
| 0.139282 | 0.199985 | 0.020836 | -0.20986 | -0.00392 | 0.307842 | 0.269772 | 0.088317 | 0.040504 |
| 0.201581 | 0.18764  | -0.02165 | 0.247548 | 0.060483 | 0.248786 | 0.1318   | -0.00101 | 0.159481 |
| -0.29117 | 0.211996 | 0.046342 | -0.11509 | 0.122473 | 0.321505 | 0.393467 | 0.135183 | 0.198267 |
| -0.03085 | 0.012404 | -0.05105 | -0.29312 | 0.120396 | 0.261878 | 0.238341 | 0.002682 | 0.18417  |
| -0.0403  | 0.119876 | 0.094351 | -0.17449 | 0.039465 | 0.228503 | 0.218556 | -0.00197 | 0.087599 |
| 0.033108 | -0.08207 | 0.119541 | -0.25023 | -0.09511 | 0.200783 | 0.169919 | 0.093529 | 0.104514 |

|          |          |          |          |          |          |          |          |          |
|----------|----------|----------|----------|----------|----------|----------|----------|----------|
| -0.11009 | 0.215004 | 0.084969 | -0.13683 | 0.269902 | 0.284837 | 0.186606 | -0.0124  | 0.243874 |
| -0.02461 | -0.04166 | -0.11817 | -0.04565 | 0.049019 | 0.134695 | 0.168704 | 0.017565 | 0.042608 |
| 0.090846 | 0.068181 | -0.10698 | -0.35091 | -0.11765 | 0.356826 | 0.357426 | 0.007043 | 0.166109 |
| -0.4076  | 0.385982 | -0.25884 | 0.591066 | -0.68539 | 0.41884  | 0.350127 | -0.1538  | 0.581093 |
| -0.16067 | 0.308374 | -0.40161 | 0.545965 | -0.39886 | 0.428787 | 0.484859 | 0.372639 | 0.380526 |
| -0.1549  | 0.37172  | -0.19938 | -0.07588 | 0.091636 | 0.429536 | 0.343601 | -0.1358  | 0.155606 |
| 0.174237 | 0.362586 | -0.31337 | -0.11649 | -0.089   | 0.378295 | 0.463117 | -0.0511  | -0.22486 |
| -0.1493  | -0.31128 | -0.0621  | 0.25008  | 0.376624 | -0.31961 | -0.27564 | 0.165206 | -0.13009 |
| 0.081937 | -0.41172 | -0.21412 | 0.558361 | 0.470629 | -0.53268 | -0.44783 | 0.207514 | -0.06767 |
| -0.23651 | -0.00279 | -0.19737 | -0.19916 | -0.26785 | 0.071373 | 0.114986 | 0.083074 | 0.122492 |
| -0.03439 | -0.27448 | -0.10326 | 0.262135 | 0.389647 | -0.38884 | -0.34611 | 0.115403 | -0.23879 |
| -0.11929 | 0.385706 | -0.39331 | 0.271798 | -0.37497 | 0.567688 | 0.520324 | 0.429556 | 0.392663 |
| 0.148259 | 0.104821 | -0.06406 | 0.156027 | -0.27901 | 0.19754  | 0.24543  | 0.176541 | 0.010812 |
| -0.34692 | 0.252208 | -0.09927 | 0.187335 | -0.33383 | 0.27791  | 0.343306 | 0.171785 | -0.13806 |
| -0.54633 | 0.440312 | -0.36127 | 0.399604 | -0.65556 | 0.517787 | 0.488108 | 0.438263 | 0.499211 |
| -0.32873 | 0.254502 | 0.044505 | -0.10207 | 0.075193 | 0.226219 | 0.226719 | 0.03995  | 0.136235 |
| -0.1558  | 0.151747 | 0.006172 | -0.35069 | -0.04106 | 0.272284 | 0.348899 | 0.066102 | 0.175001 |
| -0.1785  | 0.367407 | -0.14162 | -0.29174 | -0.22416 | 0.456308 | 0.45427  | -0.00923 | 0.124128 |
| -0.26837 | 0.24266  | -0.0367  | -0.24685 | -0.26703 | 0.313455 | 0.30183  | -0.02489 | 0.011418 |
| -0.29801 | 0.290645 | 0.112631 | -0.42839 | -0.08581 | 0.450819 | 0.424396 | 0.134936 | 0.194897 |
| -0.22122 | 0.312806 | 0.166063 | -0.35497 | -0.08905 | 0.374946 | 0.380004 | 0.04041  | 0.231298 |
| -0.37873 | 0.323648 | 0.088449 | -0.33381 | -0.05115 | 0.43746  | 0.412715 | 0.112654 | 0.111807 |
| -0.31208 | 0.191256 | 0.028358 | -0.50804 | 0.106325 | 0.282491 | 0.359631 | -0.10174 | 0.124137 |
| -0.32796 | 0.176905 | 0.239183 | -0.06419 | 0.34237  | 0.129961 | -0.20106 | 0.249237 | 0.152214 |
| -0.1856  | 0.321948 | 0.016917 | -0.26933 | 0.045192 | 0.371177 | 0.36038  | 0.290276 | 0.179023 |
| -0.24756 | 0.365044 | 0.109712 | -0.2702  | -0.2992  | 0.276068 | 0.349889 | 0.253578 | 0.131796 |
| -0.28534 | 0.364369 | -0.08053 | -0.23972 | 0.102703 | 0.383904 | 0.419549 | 0.093307 | 0.119263 |
| -0.33896 | 0.296449 | -0.0032  | -0.10761 | -0.06668 | 0.418903 | 0.406278 | 0.12314  | 0.319344 |
| -0.40611 | 0.192359 | -0.09488 | -0.23363 | 0.01455  | 0.207573 | 0.276012 | 0.090348 | 0.070712 |
| -0.23311 | 0.321782 | 0.108205 | -0.29378 | -0.2662  | 0.374397 | 0.315925 | -0.0134  | 0.292599 |
| -0.4528  | 0.57575  | -0.51719 | 0.524402 | -0.6403  | 0.46146  | 0.534125 | 0.484425 | 0.562212 |
| -0.44259 | 0.394255 | -0.02753 | 0.515707 | -0.63131 | 0.428246 | 0.362387 | -0.11396 | 0.674189 |
| -0.57611 | 0.395872 | -0.35557 | 0.588554 | -0.72268 | 0.432814 | 0.392337 | -0.0994  | 0.668696 |
| -0.51971 | 0.269471 | -0.23874 | 0.490234 | -0.80065 | 0.466536 | 0.359003 | -0.1167  | 0.660132 |
| -0.4508  | 0.20699  | -0.03373 | 0.211563 | -0.26362 | 0.36011  | 0.376431 | 0.098615 | 0.558613 |

| TCGA-FB-A | TCGA-FB-A | TCGA-FB-A | TCGA-FB-A | TCGA-FB-A | TCGA-H6-8 | TCGA-H6-A | TCGA-H8-A | TCGA-HV-A |
|-----------|-----------|-----------|-----------|-----------|-----------|-----------|-----------|-----------|
| -0.11484  | -0.23487  | 0.315133  | -0.30246  | -0.04696  | 0.261352  | -0.2807   | -0.12963  | -0.06674  |
| 0.296271  | -0.39825  | 0.251583  | 0.188098  | 0.05042   | 0.411428  | 0.247296  | 0.441527  | -0.58054  |
| 0.062279  | 0.254439  | 0.17022   | -0.12057  | 0.093214  | 0.054734  | 0.190842  | -0.07742  | 0.031532  |
| 0.138341  | -0.2957   | -0.15094  | 0.423323  | -0.06987  | 0.22998   | 0.191356  | -0.07939  | -0.04463  |
| -0.16559  | 0.169707  | -0.39051  | 0.155321  | -0.3116   | 0.343227  | 0.461163  | -0.2521   | -0.20142  |
| 0.170637  | -0.00776  | 0.12499   | 0.02117   | -0.08615  | -0.26767  | 0.028197  | 0.01406   | -0.22507  |
| 0.067749  | -0.27555  | 0.619557  | -0.44564  | 0.009386  | 0.188078  | -0.3316   | -0.34877  | -0.20011  |
| 0.27449   | 0.195556  | -0.13631  | -0.09329  | 0.104319  | -0.09508  | 0.206875  | 0.282461  | 0.152362  |
| 0.174876  | 0.069276  | -0.07621  | -0.23194  | 0.009646  | 0.082199  | 0.423153  | 0.315387  | -0.10382  |
| 0.295442  | -0.31352  | -0.27591  | -0.18636  | 0.059378  | -0.27545  | 0.367372  | 0.360448  | -0.2956   |
| 0.325447  | -0.08901  | 0.118599  | -0.30793  | 0.021257  | 0.084902  | 0.066005  | 0.453392  | -0.13985  |
| 0.031716  | -0.16754  | -0.20036  | -0.11222  | -0.31018  | 0.047406  | 0.135364  | 0.479193  | -0.08971  |
| 0.318384  | -0.11865  | 0.175001  | -0.36899  | -0.03909  | -0.10451  | 0.20735   | 0.003654  | -0.43509  |
| -0.06022  | 0.283038  | -0.15163  | -0.10094  | -0.02162  | 0.231815  | -0.00695  | -0.13086  | 0.027423  |
| -0.15036  | -0.10901  | -0.50782  | 0.020187  | -0.6547   | 0.335926  | 0.107414  | -0.07916  | -0.02203  |
| -0.05009  | -0.3303   | 0.039369  | 0.432845  | 0.305094  | 0.18888   | 0.175791  | -0.18682  | -0.07716  |
| -0.26282  | -0.09889  | -0.17745  | 0.096565  | -0.48093  | 0.045985  | 0.283061  | -0.06373  | 0.215618  |
| 0.097095  | -0.09948  | -0.07862  | -0.09302  | -0.11361  | -0.28848  | 0.0461    | -0.20238  | -0.0861   |
| -0.13889  | -0.07032  | 0.132071  | -0.21885  | 0.091249  | 0.136101  | 0.024267  | 0.149432  | -0.27251  |
| -0.27943  | -0.37661  | 0.575243  | -0.58378  | -0.08757  | -0.11356  | -0.40858  | 0.156506  | -0.47439  |
| -0.47673  | -0.14332  | -0.02082  | -0.11641  | 0.145966  | 0.245973  | -0.47925  | -0.0469   | -0.11782  |
| -0.19946  | 0.012038  | 0.327938  | -0.60792  | -0.25939  | 0.383298  | 0.057866  | 0.57123   | 0.413605  |
| -0.26269  | -0.23336  | -0.09782  | 0.199874  | 0.279345  | -0.32833  | -0.06393  | -0.2899   | -0.08805  |
| 0.117165  | -0.42316  | -0.33367  | 0.269629  | 0.025808  | -0.15049  | 0.440327  | -0.1217   | -0.3154   |
| -0.30142  | -0.23565  | -0.05001  | 0.134605  | 0.016163  | -0.31109  | -0.09573  | 0.203111  | -0.01362  |
| 0.477298  | -0.25003  | -0.2103   | 0.102155  | 0.02666   | -0.24693  | 0.134822  | 0.089464  | -0.49588  |
| 0.18097   | 0.446329  | -0.49113  | 0.202556  | -0.22406  | 0.415788  | 0.387975  | -0.13905  | 0.039493  |
| 0.391812  | 0.263093  | 0.001804  | 0.000494  | 0.327764  | 0.050328  | 0.376193  | -0.03436  | 0.20607   |
| 0.156491  | -0.30514  | -0.18058  | -0.16484  | 0.206047  | -0.50015  | 0.398994  | 0.263926  | -0.44615  |
| -0.00043  | 0.141979  | -0.29921  | -0.03125  | -0.17346  | -0.02927  | 0.425417  | -0.16702  | 0.314766  |
| 0.240592  | -0.62598  | -0.65229  | 0.407385  | 0.177045  | -0.49281  | 0.370201  | 0.133748  | -0.3353   |
| 0.153381  | -0.50256  | -0.49243  | 0.466712  | -0.44824  | -0.51999  | 0.383446  | 0.21696   | -0.18424  |
| -0.03903  | 0.142297  | -0.37863  | 0.108861  | -0.25839  | 0.24538   | 0.214942  | -0.27231  | -0.19781  |
| -0.17222  | 0.083085  | -0.40206  | 0.103328  | -0.1868   | 0.339243  | 0.196298  | -0.3141   | -0.16311  |
| 0.099931  | 0.0221    | -0.43029  | 0.218266  | -0.26787  | 0.184383  | 0.287627  | -0.27479  | -0.26626  |
| -0.06543  | 0.019443  | -0.01979  | -0.28468  | 0.296541  | 0.117893  | 0.034886  | -0.05604  | -0.24202  |
| -0.42492  | -0.55598  | 0.475596  | -0.50182  | -0.2998   | -0.18929  | 0.142319  | 0.015107  | -0.25386  |
| -0.28048  | -0.08614  | -0.16413  | -0.50176  | 0.364434  | 0.050205  | -0.22367  | 0.018186  | 0.047443  |
| -0.03442  | -0.19704  | 0.14523   | -0.35998  | -0.29169  | 0.128741  | -0.04768  | 0.263891  | -0.21484  |
| -0.25594  | -0.10209  | -0.07347  | -0.28404  | 0.127546  | 0.277913  | -0.00358  | 0.016448  | -0.19262  |
| 0.062669  | -0.31691  | -0.33381  | -0.04455  | 0.030454  | 0.190349  | 0.283879  | -0.39113  | -0.27377  |
| 0.282308  | -0.11399  | 0.069145  | -0.34384  | -0.19668  | 0.149657  | 0.046014  | 0.227835  | -0.40302  |
| 0.458512  | -0.50691  | 0.103774  | -0.34504  | -0.22793  | -0.31926  | 0.112021  | -0.00635  | -0.45042  |
| 0.192573  | -0.05638  | 0.116136  | -0.47366  | 0.475042  | -0.42332  | 0.163339  | -0.1665   | -0.29562  |
| 0.431182  | -0.48205  | -0.23906  | -0.28601  | 0.121932  | -0.18439  | 0.303052  | 0.028696  | -0.49878  |
| 0.27006   | 0.029371  | 0.079562  | -0.4314   | 0.01357   | 0.117153  | 0.106163  | 0.311108  | -0.27426  |
| -0.52407  | -0.53822  | 0.333526  | -0.03339  | 0.420926  | -0.39313  | -0.30459  | 0.327381  | 0.034829  |
| -0.16777  | -0.11149  | 0.088288  | -0.1384   | 0.079188  | -0.07414  | -0.25192  | -0.14056  | -0.13563  |
| -0.37334  | 0.109041  | 0.402662  | -0.3089   | 0.237553  | 0.017924  | -0.38857  | -0.03583  | 0.036556  |

|          |          |          |          |          |          |          |          |          |
|----------|----------|----------|----------|----------|----------|----------|----------|----------|
| 0.012079 | -0.28637 | 0.331668 | -0.39775 | -0.15577 | -0.42121 | -0.20213 | 0.071067 | -0.18595 |
| 0.206874 | -0.023   | -0.01455 | -0.18869 | 0.080916 | -0.05189 | -0.11456 | -0.23652 | -0.2704  |
| 0.032141 | 0.115837 | -0.17493 | -0.19542 | 0.040052 | -0.0816  | -0.3013  | -0.11198 | -0.05246 |
| 0.283982 | -0.52576 | 0.227922 | -0.36768 | 0.032232 | -0.04108 | 0.018446 | -0.36263 | -0.39229 |
| 0.242008 | -0.31971 | 0.225195 | -0.16968 | -0.2897  | -0.03076 | 0.00148  | -0.23032 | -0.3706  |
| -0.0164  | -0.3539  | 0.23819  | -0.34686 | -0.19889 | -0.18649 | -0.231   | -0.11849 | -0.17633 |
| -0.10956 | -0.32892 | 0.161971 | -0.44638 | -0.13419 | -0.25222 | -0.40168 | -0.18289 | -0.2126  |
| 0.147602 | -0.06348 | 0.151695 | -0.25199 | 0.283682 | -0.33747 | -0.2201  | 0.019712 | -0.24294 |
| 0.222354 | -0.02954 | -0.33754 | -0.27722 | 0.314844 | -0.4754  | 0.023618 | -0.12709 | -0.27205 |
| 0.07071  | -0.44035 | -0.08611 | -0.08354 | -0.25907 | -0.40118 | 0.287945 | -0.13032 | -0.292   |
| 0.193167 | -0.21558 | -0.20309 | -0.27213 | -0.08214 | 0.051713 | -0.22028 | -0.40122 | -0.31918 |
| 0.544731 | -0.24639 | -0.57473 | -0.03738 | -0.00918 | -0.34335 | 0.660513 | 0.097747 | -0.02357 |
| 0.005369 | -0.33017 | 0.140966 | -0.43331 | -0.07285 | -0.16022 | -0.14313 | 0.379273 | -0.28886 |
| 0.127113 | -0.42242 | 0.019758 | -0.2994  | 0.158116 | -0.11442 | 0.260249 | 0.32574  | -0.19648 |
| 0.085605 | 0.16132  | -0.11127 | -0.2129  | -0.05941 | 0.341319 | 0.14807  | -0.03074 | -0.18046 |
| -0.33127 | -0.35862 | 0.218604 | -0.06315 | 0.09062  | 0.137408 | -0.10597 | 0.008023 | 0.08506  |
| -0.10529 | 0.217491 | -0.64543 | 0.738858 | 0.054318 | 0.413481 | -0.01842 | -0.0672  | 0.082636 |
| -0.03121 | -0.0273  | 0.080765 | 0.500161 | -0.16596 | 0.419891 | -0.07056 | 0.07709  | 0.168408 |
| 0.430723 | -0.10694 | -0.04276 | -0.02177 | -0.38915 | -0.17786 | 0.271766 | 0.144007 | -0.26895 |
| -0.10026 | -0.29214 | -0.03809 | -0.0985  | -0.08445 | -0.15228 | -0.22336 | -0.06391 | -0.24607 |
| -0.41564 | -0.21613 | 0.422537 | -0.34292 | -0.1949  | -0.25192 | -0.58711 | -0.09549 | -0.18449 |
| 0.154539 | -0.41764 | -0.06159 | -0.36024 | -0.03899 | -0.2638  | -0.21039 | -0.38988 | -0.5116  |
| 0.026738 | -0.45374 | 0.199125 | -0.20489 | -0.30082 | -0.20822 | -0.01952 | -0.17149 | -0.08615 |
| -0.35966 | 0.008762 | 0.145571 | -0.38161 | 0.203678 | 0.495913 | -0.52482 | 0.289363 | -0.24324 |
| -0.51125 | 0.049422 | 0.288162 | -0.03234 | 0.242056 | -0.33566 | -0.17365 | 0.017972 | 0.293817 |
| 0.246081 | -0.08951 | 0.179265 | -0.29629 | -0.1058  | -0.05559 | 0.269379 | 0.319044 | -0.32405 |
| -0.11579 | -0.21008 | 0.064232 | -0.18492 | 0.047161 | -0.09956 | -0.1375  | -0.18124 | -0.41738 |
| -0.59617 | -0.45504 | 0.177516 | -0.23443 | -0.29403 | -0.32236 | -0.34654 | 0.486433 | -0.42046 |
| 0.071148 | 0.076336 | 0.277462 | -0.15535 | 0.034162 | -0.13167 | -0.30715 | 0.369796 | 0.104152 |
| 0.021295 | -0.07864 | -0.0284  | -0.14965 | 0.210639 | -0.06558 | 0.283048 | 0.213016 | 0.153369 |
| 0.329938 | -0.22019 | 0.089184 | -0.35177 | 0.072301 | -0.17337 | 0.126708 | 0.430411 | -0.41534 |
| 0.375562 | -0.25856 | 0.033271 | -0.33597 | -0.08219 | -0.16928 | 0.179816 | 0.39853  | -0.44726 |
| 0.041879 | 0.231723 | 0.179744 | -0.35316 | 0.191983 | 0.143517 | 0.064361 | 0.14747  | -0.15827 |
| -0.09391 | -0.01923 | 0.004328 | -0.33712 | -0.36832 | 0.010899 | -0.44046 | -0.23705 | -0.31603 |
| 0.189282 | -0.11192 | 0.024157 | -0.17609 | -0.31307 | -0.35705 | 0.23464  | 0.202144 | -0.31237 |
| -0.69439 | -0.50987 | -0.24513 | 0.037479 | 0.208981 | 0.041449 | -0.52381 | 0.573503 | -0.57128 |
| -0.47061 | -0.19219 | 0.239458 | -0.18058 | 0.114584 | 0.231287 | -0.52366 | 0.031006 | 0.020034 |
| -0.44177 | -0.05486 | 0.434415 | -0.32319 | 0.145757 | -0.21185 | -0.57652 | -0.08865 | -0.2629  |
| -0.66487 | 0.423434 | 0.523331 | -0.42733 | 0.389427 | 0.431342 | -0.50382 | -0.29866 | 0.291991 |
| -0.37472 | -0.0376  | 0.266323 | -0.19673 | -0.03879 | 0.160938 | -0.43684 | 0.171079 | 0.124843 |
| -0.67322 | 0.138525 | 0.245146 | -0.20191 | 0.295511 | -0.35654 | -0.49885 | 0.182648 | 0.459362 |
| -0.52968 | -0.52987 | 0.323544 | -0.20376 | 0.277905 | 0.340497 | -0.55246 | -0.23001 | -0.00288 |
| 0.124078 | -0.25188 | -0.00175 | -0.06732 | -0.17181 | -0.04822 | 0.080637 | 0.092662 | -0.24608 |
| -0.39407 | 0.252925 | 0.444702 | -0.37176 | 0.033006 | 0.214401 | -0.27744 | 0.129836 | 0.37267  |
| -0.53155 | 0.171    | 0.254484 | -0.17941 | 0.18974  | 0.363291 | -0.33607 | -0.28452 | -0.03564 |
| -0.61885 | 0.248571 | 0.518525 | -0.49384 | 0.491278 | 0.557164 | -0.43324 | -0.41885 | -0.07345 |
| -0.61325 | 0.392908 | 0.605858 | -0.35584 | 0.535367 | 0.351459 | -0.61671 | -0.02193 | 0.082566 |
| 0.122955 | 0.091508 | -0.33679 | 0.129739 | -0.17839 | -0.10701 | 0.186077 | -0.15736 | -0.16455 |
| 0.292226 | 0.152663 | -0.2752  | -0.14599 | -0.19741 | 0.213083 | 0.195624 | -0.24751 | -0.21153 |
| 0.225125 | -0.11731 | -0.05271 | 0.196417 | -0.28964 | -0.12281 | 0.22099  | -0.16505 | -0.29362 |

|          |          |          |          |          |          |          |          |          |
|----------|----------|----------|----------|----------|----------|----------|----------|----------|
| 0.225937 | -0.28389 | -0.44298 | 0.30837  | -0.1379  | -0.26352 | 0.272962 | 0.154469 | -0.23909 |
| 0.276788 | -0.33783 | -0.37459 | 0.222828 | -0.25468 | -0.34667 | 0.342999 | 0.080926 | -0.25178 |
| 0.355593 | -0.06124 | -0.03828 | 0.012556 | -0.4587  | -0.16799 | 0.345683 | 0.104065 | -0.24315 |
| 0.299807 | -0.1822  | -0.30164 | 0.236937 | -0.04    | -0.18402 | 0.301869 | -0.09979 | -0.19367 |
| -0.46554 | 0.285299 | 0.261253 | -0.36393 | 0.339168 | 0.329468 | -0.3255  | -0.10516 | 0.092094 |
| -0.1297  | 0.106186 | 0.06119  | -0.23687 | -0.00854 | 0.059979 | -0.05712 | -0.23422 | -0.11467 |
| -0.29174 | 0.224065 | 0.074797 | -0.02708 | 0.133674 | 0.284057 | 0.046483 | 0.046882 | 0.179923 |
| -0.27615 | -0.08696 | 0.011234 | -0.13459 | -0.02466 | 0.220802 | -0.28567 | -0.10298 | 0.034818 |
| 0.177219 | 0.165117 | 0.183184 | -0.01304 | -0.2062  | 0.04271  | 0.082679 | -0.15148 | -0.00811 |
| 0.189316 | 0.042669 | -0.29341 | -0.02429 | -0.20999 | -0.10643 | 0.318556 | -0.03922 | -0.03577 |
| 0.001528 | -0.16217 | 0.161468 | -0.51848 | -0.20746 | -0.20146 | -0.17965 | 0.103281 | -0.09854 |
| 0.327476 | 0.285637 | -0.13991 | -0.10574 | 0.027482 | -0.11136 | 0.11413  | -0.21931 | -0.09575 |
| 0.159288 | -0.02174 | -0.22564 | -0.07577 | -0.18478 | -0.10321 | 0.289254 | 0.077431 | -0.06719 |
| 0.341085 | -0.0363  | -0.32254 | 0.271577 | -0.21621 | -0.20857 | 0.364734 | -0.00341 | -0.25492 |
| 0.012137 | -0.04129 | -0.16209 | 0.06926  | -0.188   | 0.205665 | 0.112263 | -0.27004 | -0.00992 |
| 0.364362 | 0.449729 | -0.255   | -0.08202 | 0.049542 | -0.11466 | 0.223021 | -0.00124 | -0.35241 |
| 0.325386 | 0.249853 | -0.17901 | 0.168361 | -0.05017 | 0.15693  | 0.493086 | 0.154741 | -0.08192 |
| 0.056246 | 0.117009 | -0.37918 | 0.249652 | -0.2089  | 0.199815 | 0.387863 | -0.12494 | -0.01008 |
| 0.213728 | 0.052029 | -0.42198 | 0.28432  | -0.23601 | 0.226682 | 0.19547  | -0.20504 | -0.24051 |
| 0.236962 | 0.252236 | -0.39569 | -0.00804 | -0.02433 | 0.144605 | 0.385924 | -0.28166 | -0.07848 |
| 0.214526 | 0.086094 | -0.35436 | 0.003565 | -0.22776 | -0.03926 | 0.330408 | 0.105649 | -0.03452 |
| 0.265039 | 0.217793 | -0.49456 | 0.191688 | -0.22807 | 0.263061 | 0.330273 | -0.1742  | -0.203   |
| 0.271587 | 0.280872 | -0.5657  | 0.350696 | -0.26989 | 0.397796 | 0.400282 | -0.03083 | -0.20859 |
| 0.328031 | -0.43514 | -0.5959  | 0.36739  | 0.035038 | -0.31501 | 0.469629 | -0.09059 | -0.44198 |
| 0.289116 | 0.236295 | -0.32725 | -0.08961 | -0.08768 | 0.232049 | 0.186128 | -0.2671  | -0.08666 |
| 0.161109 | 0.17511  | -0.3375  | -0.11407 | -0.16386 | 0.149691 | 0.258    | -0.15712 | 0.019744 |
| 0.383118 | 0.175086 | -0.24668 | 0.129383 | -0.2286  | -0.03217 | 0.336427 | -0.23384 | -0.21776 |
| 0.463654 | -0.2497  | -0.53887 | 0.119022 | 0.384487 | -0.13261 | 0.435214 | 0.114474 | -0.36269 |
| 0.156245 | -0.45791 | -0.3728  | 0.114357 | -0.08814 | -0.47278 | 0.222598 | 0.287184 | -0.39617 |
| 0.246983 | -0.28196 | -0.45332 | 0.166153 | -0.17401 | -0.28463 | 0.289277 | -0.00693 | -0.00101 |
| -0.12009 | -0.39906 | -0.37992 | -0.04477 | -0.19183 | -0.27788 | 0.085441 | 0.252908 | 0.133467 |
| 0.07803  | -0.05222 | -0.25597 | 0.137288 | -0.22921 | -0.16963 | 0.165408 | 0.195455 | 0.182546 |
| -0.11035 | -0.21426 | -0.01704 | -0.04109 | -0.11893 | -0.32886 | -0.07556 | 0.283427 | -0.16563 |
| 0.337019 | -0.18632 | -0.34771 | 0.175672 | -0.28292 | -0.18173 | 0.220068 | -0.0544  | -0.19096 |
| 0.316126 | -0.3726  | -0.47844 | 0.318945 | -0.09531 | -0.24348 | 0.382558 | 0.249937 | -0.31627 |
| 0.208733 | -0.19858 | -0.33515 | 0.151995 | -0.22904 | -0.22427 | 0.240158 | -0.1175  | -0.16618 |
| 0.297813 | -0.18087 | -0.35318 | 0.065983 | -0.2838  | -0.12024 | 0.22715  | -0.19041 | -0.17847 |
| 0.293933 | -0.14956 | -0.40525 | 0.109227 | -0.23947 | -0.25305 | 0.309797 | -0.1886  | -0.19074 |
| 0.228804 | -0.14704 | -0.19009 | -0.02786 | -0.31838 | -0.15479 | 0.282007 | 0.065756 | -0.17279 |
| 0.240467 | -0.03637 | -0.22467 | 0.040694 | -0.19763 | -0.24802 | 0.445476 | -0.01197 | -0.06286 |
| 0.257358 | -0.1243  | -0.45843 | 0.151661 | -0.05534 | -0.11106 | 0.46578  | -0.01138 | -0.11239 |
| 0.363798 | -0.55614 | -0.5507  | 0.429081 | -0.03296 | -0.54024 | 0.263795 | 0.254756 | -0.5912  |
| 0.308124 | 0.08235  | 0.126915 | 0.012782 | -0.33931 | -0.02074 | 0.142851 | -0.18613 | -0.08074 |
| 0.303234 | 0.037479 | -0.15286 | 0.045873 | -0.36713 | 0.060161 | 0.244359 | -0.17661 | -0.10382 |
| 0.302653 | 0.093072 | -0.25806 | -0.08477 | -0.21034 | 0.11178  | 0.336184 | -0.06347 | -0.25179 |
| 0.083286 | 0.085537 | 0.541421 | 0.266933 | -0.04755 | -0.02215 | 0.217566 | 0.194681 | 0.186849 |
| 0.160994 | 0.054475 | -0.41141 | 0.15826  | -0.18704 | 0.033466 | 0.303055 | -0.20793 | -0.04148 |
| 0.263108 | 0.197103 | -0.16128 | -0.01078 | -0.11289 | -0.02242 | 0.0879   | -0.2201  | -0.04383 |
| 0.309497 | 0.026035 | -0.14452 | 0.036766 | -0.23362 | 0.000422 | 0.312834 | -0.03882 | -0.17648 |
| -0.07372 | 0.094441 | -0.10147 | -0.0444  | -0.0011  | 0.06275  | 0.118246 | -0.25393 | -0.0121  |

|          |          |          |          |          |          |          |          |          |
|----------|----------|----------|----------|----------|----------|----------|----------|----------|
| 0.247477 | 0.017816 | -0.27695 | 0.305079 | -0.23478 | 0.053394 | 0.311843 | -0.16266 | 0.034434 |
| 0.348509 | 0.035455 | 0.080668 | -0.13089 | -0.23362 | -0.14026 | 0.231802 | -0.02676 | -0.08042 |
| 0.252053 | -0.12644 | -0.2563  | -0.10189 | -0.26876 | -0.12445 | 0.404618 | -0.09738 | -0.26629 |
| 0.087365 | -0.5822  | -0.5309  | 0.246319 | -0.01139 | -0.63509 | 0.490046 | 0.186355 | -0.37183 |
| 0.514892 | -0.3362  | 0.247479 | -0.50806 | 0.47853  | -0.48511 | 0.650263 | 0.294675 | -0.41041 |
| 0.408128 | -0.23949 | -0.07399 | -0.20485 | -0.23882 | -0.09147 | 0.263888 | -0.07173 | -0.35017 |
| 0.333946 | -0.19482 | -0.15818 | -0.14201 | -0.20622 | 0.008411 | 0.288294 | -0.19011 | -0.07399 |
| -0.32557 | -0.40101 | 0.287925 | -0.07145 | 0.082099 | -0.26945 | -0.23047 | 0.257718 | -0.00236 |
| -0.49216 | -0.517   | 0.437244 | 0.008209 | 0.325013 | -0.40417 | -0.28347 | 0.353051 | 0.089874 |
| -0.07142 | 0.083504 | -0.09218 | -0.17549 | -0.2731  | -0.25339 | -0.03685 | 0.012357 | 0.134013 |
| -0.41044 | -0.38375 | 0.357331 | -0.09892 | 0.183169 | -0.2122  | -0.35076 | 0.257231 | 0.047453 |
| 0.253408 | -0.35189 | -0.5733  | 0.280393 | -0.05978 | -0.32143 | 0.37119  | -0.10939 | -0.34099 |
| -0.11451 | -0.29941 | 0.004159 | 0.010576 | 0.056542 | -0.3145  | 0.305221 | -0.03513 | 0.096843 |
| -0.13351 | -0.24011 | -0.2676  | -0.14805 | -0.19883 | -0.34215 | 0.250094 | -0.01664 | -0.0204  |
| 0.202551 | -0.57364 | -0.60728 | 0.301548 | -0.04363 | -0.48143 | 0.471424 | 0.176271 | -0.27806 |
| 0.117249 | 0.170412 | -0.3441  | 0.086081 | -0.22781 | 0.154313 | 0.294115 | -0.0696  | -0.0368  |
| -0.03001 | 0.011683 | -0.19905 | 0.13065  | -0.25247 | 0.193649 | 0.188973 | -0.34892 | -0.18793 |
| 0.325216 | 0.087095 | -0.32838 | -0.10776 | -0.24193 | 0.160251 | 0.289341 | -0.1122  | -0.2986  |
| 0.143036 | 0.133382 | -0.27396 | -0.02151 | -0.02963 | 0.164948 | 0.201028 | -0.30765 | -0.1647  |
| 0.272291 | 0.082368 | -0.14387 | -0.03136 | -0.26034 | 0.19125  | 0.270263 | -0.24648 | -0.20427 |
| 0.306529 | 0.157183 | -0.1586  | 0.04548  | -0.25668 | 0.188581 | 0.233514 | -0.2416  | -0.12841 |
| 0.255745 | 0.122988 | -0.21013 | -0.06066 | -0.26756 | 0.096325 | 0.143952 | -0.10616 | -0.12005 |
| 0.061962 | 0.226388 | -0.34729 | -0.08354 | -0.2683  | 0.072506 | 0.317857 | -0.1556  | -0.19407 |
| -0.04463 | 0.150183 | -0.43853 | 0.429487 | -0.19038 | 0.212576 | 0.411296 | -0.18287 | 0.181542 |
| 0.186314 | 0.260529 | -0.33215 | 0.182164 | -0.15775 | 0.115861 | 0.229006 | -0.25237 | -0.12112 |
| 0.078915 | 0.385274 | -0.24179 | -0.07095 | -0.00721 | 0.284231 | 0.327129 | -0.18572 | -0.1311  |
| 0.22196  | 0.286989 | -0.27429 | -0.06839 | -0.31323 | 0.189456 | 0.233529 | -0.21457 | -0.15507 |
| 0.27506  | 0.08827  | -0.41378 | 0.259482 | -0.19349 | -0.12753 | 0.304672 | -0.03092 | -0.28357 |
| 0.195648 | 0.306697 | -0.29102 | -0.10054 | -0.14424 | 0.212604 | 0.306271 | 0.093331 | 0.014567 |
| 0.402318 | 0.285928 | -0.18544 | -0.10411 | -0.12559 | 0.099443 | 0.260479 | -0.18542 | -0.09081 |
| 0.275402 | -0.65277 | -0.61854 | 0.5161   | -0.17472 | -0.51191 | 0.401226 | 0.283752 | -0.62278 |
| 0.216098 | -0.41008 | -0.53764 | 0.539645 | -0.21341 | -0.48918 | 0.316546 | 0.090074 | -0.49191 |
| 0.263194 | -0.64151 | -0.61494 | 0.547947 | -0.10875 | -0.66003 | 0.400065 | 0.105169 | -0.54101 |
| 0.128922 | -0.65198 | -0.50641 | 0.465071 | -0.0444  | -0.68529 | 0.471212 | 0.124038 | -0.46071 |
| 0.077431 | -0.3484  | -0.49645 | 0.407242 | -0.32484 | -0.31082 | 0.369559 | 0.061053 | -0.25077 |



| TCGA-HV-7 | TCGA-HZ-7 | TCGA-HZ-7 | TCGA-HZ-7 | TCGA-HZ-7 | TCGA-HZ-8 | TCGA-HZ-8 | TCGA-HZ-8 | TCGA-HZ-8 |
|-----------|-----------|-----------|-----------|-----------|-----------|-----------|-----------|-----------|
| -0.06743  | 0.082171  | 0.213127  | -0.24312  | -0.14291  | -0.0124   | 0.085421  | 0.13787   | 0.223935  |
| 0.45649   | 0.146438  | -0.08848  | 0.213316  | -0.48357  | 0.233314  | 0.364045  | 0.385348  | 0.210237  |
| 0.297842  | 0.015347  | 0.289388  | 0.032813  | 0.306598  | 0.001116  | 0.084119  | 0.00555   | -0.13067  |
| 0.457214  | 0.111971  | -0.2323   | 0.07441   | 0.227903  | 0.304178  | -0.07743  | -0.03745  | -0.1181   |
| 0.617709  | -0.20578  | 0.266255  | -0.22294  | 0.383947  | 0.356415  | -0.29877  | -0.23288  | -0.21447  |
| -0.10896  | 0.014804  | -0.04078  | -0.03477  | -0.14979  | -0.072    | 0.04188   | -0.18158  | -0.06487  |
| -0.17342  | 0.216069  | 0.165676  | -0.40577  | -0.04196  | -0.24647  | -0.35901  | -0.42277  | -0.37248  |
| -0.06913  | -0.18894  | -0.15521  | -0.02758  | -0.14395  | -0.05447  | -0.08152  | -0.26244  | -0.12936  |
| -0.10577  | -0.09357  | 0.05124   | 0.183644  | 0.034798  | 0.08895   | 0.085735  | -0.04693  | -0.3605   |
| 0.214474  | -0.28634  | -0.08279  | 0.36138   | -0.00366  | 0.188841  | -0.04782  | -0.14539  | -0.33094  |
| 0.006991  | -0.37393  | -0.02322  | 0.239454  | -0.05164  | 0.01419   | -0.18615  | -0.00519  | -0.41058  |
| -0.10216  | -0.25263  | 0.062175  | 0.084295  | 0.100166  | 0.215865  | -0.16739  | 0.231339  | -0.32313  |
| 0.193937  | 0.042669  | 0.15123   | -0.02402  | -0.08158  | -0.17586  | 0.07402   | 0.032176  | -0.17545  |
| 0.075426  | -0.06202  | -0.10288  | -0.09048  | 0.032644  | -0.18808  | -0.25131  | -0.18706  | 0.067026  |
| 0.33906   | -0.06142  | 0.453353  | 0.178269  | 0.358597  | 0.141029  | -0.0898   | 0.008514  | -0.08059  |
| 0.213044  | 0.28634   | 0.322124  | -0.02986  | 0.22472   | 0.220293  | 0.169503  | 0.03541   | 0.274648  |
| 0.007359  | 0.224801  | 0.22597   | -0.12236  | -0.08273  | 0.045966  | -0.3614   | 0.301597  | -0.37665  |
| -0.02755  | 0.185289  | 0.032862  | 0.182437  | 0.008615  | 0.28877   | 0.016142  | 0.240522  | -0.24361  |
| 0.007793  | -0.25697  | 0.215033  | -0.03734  | 0.133576  | 0.193589  | -0.10573  | 0.33943   | -0.1971   |
| -0.60713  | -0.48938  | -0.30318  | -0.68059  | -0.29248  | -0.12274  | -0.24758  | -0.55941  | 0.739829  |
| -0.31045  | 0.216621  | 0.076972  | -0.28312  | 0.183279  | 0.128226  | 0.095606  | -0.02674  | 0.419433  |
| -0.64333  | 0.294805  | 0.329158  | -0.02429  | -0.1851   | -0.21986  | 0.282342  | 0.210577  | 0.422089  |
| -0.04246  | -0.17876  | -0.15026  | -0.07248  | -0.15447  | 0.181388  | -0.12074  | -0.02417  | -0.01065  |
| 0.43291   | 0.098015  | -0.11879  | 0.231836  | 0.046847  | 0.281467  | 0.040354  | 0.233274  | 0.140252  |
| -0.00605  | -0.08813  | -0.33998  | -0.1958   | -0.02653  | 0.341259  | -0.24083  | -0.38562  | -0.40379  |
| 0.434243  | 0.181287  | -0.10201  | 0.439259  | -0.0049   | 0.394227  | 0.173364  | 0.037383  | 0.195366  |
| -0.14224  | 0.124563  | -0.02618  | 0.139796  | 0.312858  | -0.37658  | -0.10146  | -0.1229   | 0.326254  |
| -0.09698  | 0.31481   | -0.03569  | 0.261241  | -0.15286  | -0.19589  | 0.152533  | 0.037217  | -0.10307  |
| 0.067154  | 0.098505  | -0.22201  | 0.097938  | -0.42481  | -0.04259  | 0.223662  | 0.305091  | -0.45234  |
| 0.199168  | 0.133616  | 0.311745  | 0.02071   | 0.124071  | -0.08158  | 0.086794  | -0.01723  | 0.04349   |
| 0.072027  | 0.342463  | 0.083328  | 0.601469  | 0.302615  | 0.568856  | 0.495469  | 0.481488  | 0.392861  |
| -0.32757  | 0.210035  | -0.18513  | 0.425283  | -0.10306  | 0.431663  | -0.05836  | 0.419275  | 0.102801  |
| 0.010953  | 0.003933  | 0.274546  | 0.19386   | 0.340429  | 0.07984   | 0.082796  | -0.0006   | 0.143764  |
| 0.050851  | 0.161717  | 0.353281  | 0.110364  | 0.341127  | 0.033925  | 0.120044  | 0.022503  | 0.336766  |
| 0.128647  | 0.153053  | 0.244232  | 0.288911  | 0.359026  | 0.162411  | 0.220418  | 0.129332  | 0.066083  |
| 0.151266  | -0.15717  | 0.096523  | 0.100762  | 0.087478  | 0.304649  | -0.00217  | -0.10765  | -0.00815  |
| -0.56644  | 0.272682  | -0.09735  | -0.42289  | -0.01986  | 0.431263  | 0.169505  | 0.319538  | -0.35762  |
| -0.04957  | -0.35446  | -0.07654  | -0.0846   | -0.15305  | 0.215569  | -0.3285   | -0.18582  | -0.0098   |
| -0.40208  | -0.28057  | 0.108742  | -0.08843  | -0.12044  | 0.012762  | 0.256865  | -0.17853  | -0.1773   |
| 0.133197  | -0.10033  | 0.19858   | -0.09898  | -0.18366  | -0.01092  | -0.32109  | -0.09316  | 0.007688  |
| 0.333338  | -0.02304  | 0.044588  | 0.160654  | 0.096308  | 0.344118  | -0.03945  | 0.00912   | 0.387082  |
| -0.27781  | -0.19093  | 0.035937  | 0.038808  | -0.11217  | -0.09618  | 0.364466  | -0.18598  | -0.33762  |
| -0.19369  | 0.092003  | -0.14682  | 0.201302  | -0.21774  | 0.389101  | 0.281893  | 0.291227  | -0.53224  |
| 0.125371  | -0.40185  | 0.15439   | -0.37392  | -0.33626  | 0.122688  | -0.40154  | 0.060296  | -0.59673  |
| -0.12496  | 0.184123  | -0.03852  | 0.571546  | 0.024088  | 0.266653  | 0.445409  | 0.168179  | -0.5386   |
| -0.05313  | -0.2562   | 0.142768  | 0.131717  | -0.12805  | -0.01863  | 0.088102  | -0.20698  | -0.38117  |
| -0.21193  | -0.15692  | -0.57995  | -0.52548  | -0.36299  | 0.372162  | -0.38637  | -0.52247  | -0.48312  |
| -0.17194  | 0.071312  | -0.02837  | -0.18017  | 0.192494  | 0.19944   | -0.02809  | -0.08999  | 0.055968  |
| -0.37707  | -0.12994  | -0.06237  | -0.4567   | 0.001699  | 0.198703  | -0.21791  | -0.19051  | 0.1973    |

|          |          |          |          |          |          |          |          |          |
|----------|----------|----------|----------|----------|----------|----------|----------|----------|
| -0.32443 | -0.09483 | -0.10158 | -0.07675 | -0.12605 | 0.006025 | -0.1007  | 0.211035 | 0.018042 |
| 0.039169 | -0.18609 | -0.23707 | -0.15258 | -0.29347 | 0.167703 | 0.245546 | 0.471379 | -0.26333 |
| -0.10316 | 0.097596 | 0.076906 | -0.10579 | 0.150674 | -0.18065 | 0.118446 | 0.304711 | 0.143459 |
| -0.37288 | -0.05469 | -0.12735 | -0.19477 | -0.44039 | 0.216436 | 0.135188 | 0.421103 | -0.34252 |
| 0.001227 | 0.156547 | -0.00411 | -0.0556  | -0.11982 | -0.093   | 0.322225 | 0.343087 | 0.235036 |
| -0.0022  | -0.19493 | -0.22052 | -0.2234  | 0.012484 | 0.02452  | -0.03465 | -0.01021 | -0.1328  |
| -0.35679 | -0.15094 | -0.26449 | -0.214   | -0.24982 | 0.116432 | -0.1649  | -0.28634 | -0.41738 |
| -0.18503 | -0.1563  | -0.33381 | 0.005201 | -0.32659 | 0.328069 | -0.13052 | -0.2494  | -0.19957 |
| 0.067258 | -0.18835 | -0.36914 | -0.08126 | -0.19263 | 0.204161 | -0.08693 | -0.28405 | -0.27182 |
| -0.08276 | 0.276373 | -0.25661 | 0.158666 | -0.10474 | 0.387989 | 0.142169 | 0.338505 | -0.26921 |
| -0.30418 | 0.119339 | -0.06329 | 0.109353 | 0.038298 | 0.208795 | 0.504549 | 0.308659 | -0.31178 |
| 0.311882 | -0.11142 | -0.20128 | 0.512522 | -0.22125 | 0.201242 | 0.41472  | 0.11965  | -0.59276 |
| -0.27283 | -0.02301 | -0.20233 | -0.15161 | -0.09341 | 0.04855  | 0.052798 | 0.205712 | -0.14911 |
| 0.017206 | -0.19814 | -0.2338  | -0.03924 | -0.1332  | 0.144535 | 0.060404 | -0.10396 | -0.33793 |
| -0.04329 | -0.09712 | 0.316941 | 0.176995 | 0.130544 | 0.05086  | 0.159043 | 0.252807 | 0.146321 |
| 0.097346 | -0.11327 | 0.290039 | -0.12099 | 0.184574 | 0.380537 | -0.01056 | 0.199056 | -0.03132 |
| 0.696978 | -0.05777 | 0.129537 | -0.15965 | 0.399127 | 0.113986 | -0.0235  | -0.10012 | 0.387454 |
| 0.588204 | 0.096389 | 0.230311 | -0.12693 | 0.27016  | 0.086101 | 0.047004 | -0.06986 | 0.146062 |
| 0.001345 | 0.040705 | 0.104857 | 0.199767 | -0.10305 | -0.39335 | 0.127288 | 0.141485 | -0.20516 |
| -0.21156 | 0.013591 | -0.24013 | -0.2008  | -0.30517 | 0.262729 | 0.020992 | -0.06035 | -0.30871 |
| -0.55899 | 0.149372 | -0.36961 | -0.52374 | -0.28104 | 0.453581 | -0.33068 | -0.02829 | 0.084767 |
| -0.20693 | 0.056809 | -0.04462 | -0.00671 | -0.21044 | 0.275263 | 0.394359 | 0.378255 | -0.36201 |
| -0.26401 | 0.107068 | -0.19397 | -0.13774 | -0.32578 | 0.407408 | 0.155564 | 0.119789 | -0.43062 |
| -0.37459 | -0.26884 | 0.100317 | -0.34976 | -0.02048 | 0.226682 | 0.171173 | 0.019081 | 0.16987  |
| 0.01338  | 0.051195 | -0.27145 | -0.38993 | -0.07819 | 0.530508 | -0.29711 | -0.378   | -0.22643 |
| -0.18841 | -0.16288 | 0.066895 | 0.225988 | -0.06185 | 0.085958 | 0.214755 | -0.18553 | -0.36514 |
| -0.13701 | -0.28456 | -0.20156 | -0.34593 | -0.08073 | 0.275483 | -0.09023 | -0.34464 | -0.24159 |
| -0.05891 | -0.21311 | 0.270462 | -0.55888 | 0.151566 | 0.147616 | -0.58394 | 0.032788 | -0.5042  |
| -0.36259 | -0.15988 | 0.025007 | -0.11315 | -0.40103 | -0.37122 | -0.04828 | 0.272636 | -0.29634 |
| -0.18012 | -0.072   | 0.056067 | 0.013866 | 0.165065 | 0.388413 | 0.019652 | 0.013954 | -0.34359 |
| -0.19742 | -0.28751 | -0.12007 | 0.145248 | -0.13717 | 0.275416 | 0.13951  | -0.15565 | -0.47667 |
| -0.11401 | -0.2981  | -0.1105  | 0.17535  | -0.1702  | 0.178967 | 0.198959 | -0.05309 | -0.46723 |
| -0.28832 | -0.30606 | -0.10934 | -0.20793 | -0.17636 | 0.039562 | -0.15592 | -0.29538 | 0.017062 |
| -0.11298 | -0.04444 | 0.145715 | -0.39256 | -0.27654 | 0.133994 | -0.00313 | -0.30575 | -0.1213  |
| 0.109979 | 0.143832 | 0.003247 | 0.241647 | 0.159337 | -0.08354 | -0.00883 | 0.118429 | -0.07814 |
| -0.55965 | 0.292292 | -0.45592 | -0.01645 | -0.3343  | 0.659694 | 0.133153 | -0.30959 | -0.35044 |
| -0.4661  | 0.185027 | -0.04609 | -0.21875 | -0.10896 | 0.125701 | 0.040555 | -0.14169 | 0.32911  |
| -0.3967  | 0.215861 | -0.05517 | -0.3271  | 0.278494 | 0.484107 | -0.10609 | -0.10604 | 0.375574 |
| -0.67383 | -0.49587 | 0.011573 | -0.61142 | -0.40161 | 0.241009 | -0.38744 | -0.28238 | 0.352126 |
| -0.47559 | 0.30639  | -0.07121 | -0.12276 | -0.29009 | 0.183717 | 0.17168  | -0.11078 | -0.06335 |
| -0.61908 | 0.320196 | -0.03773 | -0.601   | -0.02737 | 0.558752 | -0.20618 | 0.127515 | 0.201455 |
| -0.46879 | 0.635428 | 0.215051 | 0.02148  | -0.10668 | 0.595157 | 0.287994 | 0.509317 | -0.22214 |
| -0.0223  | 0.192307 | 0.021335 | 0.297663 | -0.30164 | 0.24999  | 0.233548 | 0.269417 | -0.34384 |
| -0.42091 | -0.48606 | -0.22418 | -0.56016 | -0.13466 | 0.018565 | -0.40506 | -0.47578 | -0.01141 |
| -0.48069 | 0.051311 | -0.06629 | -0.3641  | -0.19266 | 0.285525 | -0.135   | -0.1599  | 0.306684 |
| -0.701   | -0.17063 | 0.063523 | -0.44758 | -0.19941 | 0.225582 | 0.016821 | -0.17789 | 0.312956 |
| -0.51363 | -0.5057  | -0.06856 | -0.53654 | -0.22368 | -0.06095 | -0.2492  | -0.37467 | 0.353961 |
| 0.015999 | 0.148497 | 0.126632 | 0.292231 | 0.179095 | -0.00824 | 0.146571 | 0.22811  | -0.00711 |
| -0.14517 | 0.253868 | 0.290879 | 0.184623 | 0.146175 | -0.37689 | 0.213313 | 0.395032 | 0.125456 |
| 0.057658 | 0.215442 | 0.147141 | 0.305818 | 0.162418 | 0.162732 | 0.201227 | 0.172487 | -0.20144 |

|          |          |          |          |          |          |          |          |          |
|----------|----------|----------|----------|----------|----------|----------|----------|----------|
| 0.016934 | 0.129001 | 0.07285  | 0.462047 | 0.279902 | 0.294455 | 0.291543 | 0.26787  | -0.14989 |
| -0.04343 | 0.266668 | 0.139454 | 0.409834 | 0.152899 | 0.118361 | 0.303055 | 0.433555 | -0.22939 |
| -0.15641 | 0.092767 | 0.025666 | 0.238557 | 0.011353 | -0.34206 | 0.11143  | 0.051505 | -0.14236 |
| 0.031005 | 0.246265 | 0.088645 | 0.320094 | 0.202305 | 0.265275 | 0.248101 | 0.254442 | -0.25228 |
| -0.48908 | -0.06871 | 0.279961 | -0.32975 | 0.096712 | -0.23201 | -0.00471 | 0.029805 | 0.36616  |
| -0.18267 | 0.170964 | 0.221451 | -0.09379 | 0.102762 | -0.01524 | 0.257851 | 0.157907 | 0.004559 |
| -0.18847 | -0.09663 | -0.01358 | -0.16033 | 0.030364 | -0.12941 | -0.04218 | -0.15378 | 0.165976 |
| -0.28811 | 0.196642 | 0.255368 | -0.14161 | 0.253361 | -0.13708 | 0.179829 | 0.212961 | 0.278502 |
| -0.29072 | 0.197367 | 0.106577 | 0.294938 | -0.33311 | 0.126242 | 0.099681 | 0.363381 | -0.05645 |
| 0.082782 | -0.07117 | 0.219693 | 0.104136 | 0.119221 | -0.11967 | 0.036245 | 0.062949 | 0.032793 |
| -0.29716 | -0.32358 | -0.19346 | -0.30191 | -0.36368 | 0.174709 | -0.1092  | -0.01595 | -0.41204 |
| -0.07028 | 0.186707 | 0.182795 | 0.177652 | 0.083835 | -0.21004 | 0.161825 | 0.359444 | 0.142731 |
| -0.14274 | 0.047827 | -0.05264 | 0.179978 | 0.077369 | -0.12558 | 0.133173 | 0.138828 | -0.1559  |
| 0.141106 | 0.202753 | 0.201184 | 0.367682 | 0.206276 | 0.083294 | 0.276063 | 0.295009 | -0.31541 |
| 0.027303 | 0.214147 | 0.219434 | 0.198219 | 0.169537 | -0.10229 | 0.12997  | 0.040889 | 0.153107 |
| -0.0908  | 0.251707 | 0.451978 | 0.369787 | 0.376292 | -0.4547  | 0.367338 | 0.359294 | 0.043828 |
| 0.280505 | -0.36195 | 0.03067  | -0.06514 | 0.004685 | -0.38956 | -0.08996 | -0.01709 | -0.09565 |
| 0.358361 | -0.03857 | 0.335631 | 0.293449 | 0.218232 | -0.21489 | 0.156301 | -0.07882 | 0.150745 |
| 0.234233 | 0.334109 | 0.451909 | 0.399844 | 0.377818 | 0.006359 | 0.454707 | 0.280702 | 0.073575 |
| 0.188319 | 0.058799 | 0.199841 | 0.12878  | 0.203178 | -0.12742 | 0.172806 | 0.004717 | 0.098033 |
| 0.028133 | 0.07179  | 0.215026 | 0.248171 | 0.204178 | -0.09157 | 0.065762 | 0.183628 | -0.02656 |
| 0.290531 | 0.180891 | 0.400934 | 0.255864 | 0.382592 | -0.02136 | 0.306224 | 0.325388 | 0.327534 |
| 0.468874 | 0.043317 | 0.444989 | 0.346584 | 0.439289 | 0.189721 | 0.294525 | 0.279821 | 0.380939 |
| 0.127733 | 0.393401 | 0.170984 | 0.489327 | 0.209452 | 0.334151 | 0.344366 | 0.353856 | 0.016853 |
| 0.14445  | 0.290707 | 0.489359 | 0.234272 | 0.269326 | -0.25509 | 0.370905 | 0.265024 | 0.292663 |
| 0.111777 | 0.004173 | 0.32548  | -0.06632 | 0.057005 | -0.13386 | 0.075978 | -0.02837 | -0.06148 |
| 0.286371 | 0.277669 | 0.270461 | 0.183536 | 0.130448 | -0.21508 | 0.280361 | 0.263788 | -0.17812 |
| 0.402646 | 0.376637 | -0.00081 | 0.500862 | 0.002018 | 0.298012 | 0.391088 | 0.24657  | -0.16531 |
| -0.17607 | 0.311162 | -0.13967 | 0.425732 | 0.260037 | 0.351702 | 0.258992 | 0.391934 | 0.517933 |
| -0.11902 | -0.00913 | 0.204816 | 0.402418 | 0.17965  | -0.02041 | 0.17882  | 0.428123 | 0.204134 |
| -0.22105 | 0.088513 | 0.083721 | 0.439215 | 0.318956 | 0.032067 | 0.291297 | 0.272165 | 0.126702 |
| -0.05166 | -0.17908 | 0.099662 | 0.139302 | 0.072297 | -0.15661 | -0.05012 | 0.2288   | 0.026733 |
| -0.28731 | -0.09549 | -0.17995 | 0.115449 | 0.14941  | 0.373503 | 0.008868 | 0.168871 | -0.08366 |
| -0.13401 | 0.287474 | 0.202286 | 0.525121 | 0.164138 | 0.033958 | 0.335163 | 0.360694 | 0.026905 |
| 0.100719 | 0.361569 | 0.150158 | 0.561835 | 0.189023 | 0.457098 | 0.291532 | 0.307558 | 0.028465 |
| -0.11775 | 0.258791 | 0.136246 | 0.365287 | 0.081176 | 0.168228 | 0.208838 | 0.370529 | 0.296004 |
| -0.18597 | 0.258323 | 0.348423 | 0.352586 | 0.156815 | -0.13567 | 0.282293 | 0.435625 | -0.03176 |
| -0.13664 | 0.268488 | 0.266402 | 0.345877 | 0.146949 | -0.06794 | 0.256562 | 0.436773 | -0.11116 |
| -0.25241 | 0.187843 | 0.308015 | 0.424744 | 0.087037 | -0.02254 | 0.221404 | 0.386809 | -0.16624 |
| -0.01395 | -0.0278  | 0.206623 | 0.252361 | 0.201139 | 0.011185 | 0.160774 | 0.257134 | -0.07444 |
| 0.076256 | 0.225019 | 0.304788 | 0.352663 | 0.185448 | -0.04309 | 0.269021 | 0.195141 | -0.01397 |
| -0.19729 | 0.312084 | 0.053497 | 0.596182 | 0.080235 | 0.468026 | 0.255891 | 0.401839 | 0.212061 |
| -0.15541 | 0.275272 | 0.253766 | 0.245098 | 0.106145 | -0.15339 | 0.241176 | 0.316897 | -0.24651 |
| -0.01055 | 0.206877 | 0.242323 | 0.320366 | 0.114487 | -0.3228  | 0.255932 | 0.327828 | 0.033791 |
| -0.02019 | 0.314082 | 0.26836  | 0.250612 | 0.21767  | 0.084975 | 0.175828 | 0.30512  | -0.238   |
| 0.179734 | 0.238948 | 0.073834 | 0.29323  | 0.210883 | 0.086523 | 0.21042  | 0.278532 | -0.08571 |
| 0.134937 | 0.130893 | 0.314879 | 0.202333 | 0.272879 | -0.05485 | 0.217475 | 0.261469 | 0.16509  |
| -0.01289 | 0.118089 | 0.161397 | 0.249554 | 0.064995 | -0.20359 | 0.16025  | 0.279463 | -0.05008 |
| 0.04353  | 0.109554 | 0.193933 | 0.323981 | 0.098531 | -0.22855 | 0.197807 | 0.225655 | -0.11362 |
| -0.23532 | 0.195169 | 0.336275 | 0.091282 | 0.1936   | -0.09081 | 0.228581 | 0.293251 | 0.216556 |

|          |          |          |          |          |          |          |          |          |
|----------|----------|----------|----------|----------|----------|----------|----------|----------|
| 0.313444 | 0.210958 | 0.254677 | 0.31639  | 0.220628 | -0.08178 | 0.214047 | 0.145269 | -0.07048 |
| -0.12158 | 0.082613 | 0.124574 | 0.246879 | 0.106187 | -0.01995 | 0.159597 | 0.235035 | -0.01171 |
| -0.07017 | 0.412481 | 0.269427 | 0.421657 | 0.219635 | -0.00646 | 0.306963 | 0.31706  | -0.04564 |
| -0.35827 | 0.303377 | -0.20443 | 0.521731 | 0.264782 | 0.466002 | 0.143521 | 0.485823 | 0.442663 |
| 0.113495 | 0.332989 | -0.43276 | 0.290818 | -0.48521 | 0.137321 | 0.379597 | 0.374279 | -0.59864 |
| -0.23322 | 0.24355  | 0.363967 | 0.480196 | 0.191842 | -0.08114 | 0.275157 | 0.18378  | -0.23042 |
| -0.03821 | 0.272697 | 0.100822 | 0.240353 | 0.126141 | 0.02166  | 0.355465 | 0.151767 | -0.33827 |
| -0.26756 | -0.10836 | -0.308   | -0.3619  | -0.15153 | 0.153506 | -0.23981 | -0.29155 | -0.3701  |
| -0.19489 | -0.24911 | -0.58268 | -0.49276 | -0.33764 | 0.337855 | -0.34924 | -0.44774 | -0.50755 |
| -0.24107 | 0.049761 | -0.03458 | 0.023312 | -0.02566 | -0.0148  | 0.013865 | -0.02177 | -0.17797 |
| -0.26544 | -0.16943 | -0.38562 | -0.45588 | -0.15091 | 0.141559 | -0.2638  | -0.36077 | -0.31597 |
| 0.218911 | 0.296852 | -0.07179 | 0.408495 | 0.329925 | 0.169265 | 0.406007 | 0.302069 | -0.04024 |
| 0.201224 | 0.205796 | 0.14253  | -0.16524 | 0.115097 | 0.10618  | 0.113839 | 0.112892 | -0.13255 |
| -0.13806 | 0.201746 | 0.118746 | 0.111978 | 0.172094 | -0.03482 | 0.161627 | 0.137621 | 0.03666  |
| -0.00058 | 0.117166 | 0.265172 | 0.528567 | 0.38382  | 0.259554 | 0.324137 | 0.523295 | 0.357797 |
| 0.159948 | 0.025766 | 0.275321 | 0.194205 | 0.256498 | -0.13623 | 0.198063 | 0.164594 | 0.167709 |
| -0.05974 | 0.233724 | 0.290137 | 0.179332 | 0.170909 | -0.18706 | 0.212569 | 0.333495 | 0.304789 |
| -0.15349 | 0.268071 | 0.302205 | 0.330909 | 0.190547 | -0.2419  | 0.363065 | 0.484917 | 0.010506 |
| -0.03123 | 0.049353 | 0.315315 | 0.082529 | 0.178961 | -0.26113 | 0.208614 | 0.340251 | 0.305409 |
| -0.04402 | 0.211279 | 0.30438  | 0.225594 | 0.118139 | -0.3686  | 0.219961 | 0.432991 | 0.263858 |
| -0.03167 | 0.34688  | 0.371664 | 0.270871 | 0.324181 | -0.2459  | 0.3786   | 0.38704  | 0.125445 |
| 0.051485 | 0.150878 | 0.276022 | 0.214144 | 0.269183 | -0.29894 | 0.323245 | 0.411788 | 0.201014 |
| -0.01266 | 0.245229 | 0.27263  | 0.036883 | 0.113475 | -0.14233 | 0.19911  | 0.400304 | 0.102834 |
| 0.5032   | -0.28758 | 0.34479  | 0.227384 | 0.247333 | -0.06424 | 0.093235 | -0.14377 | 0.257586 |
| 0.059594 | 0.266755 | 0.277376 | 0.183433 | 0.292235 | -0.20741 | 0.265572 | 0.320887 | 0.196609 |
| -0.10471 | 0.024035 | 0.097759 | -0.02107 | 0.044093 | -0.24138 | 0.130858 | 0.260993 | 0.18216  |
| -0.09163 | 0.190376 | 0.311099 | 0.15434  | 0.164359 | -0.36645 | 0.199826 | 0.35265  | 0.176883 |
| 0.044163 | 0.058908 | 0.273113 | 0.290723 | 0.139231 | -0.27739 | 0.125458 | 0.451066 | 0.202091 |
| -0.02142 | -0.05422 | 0.292025 | 0.124766 | 0.273865 | -0.25541 | 0.149438 | 0.224199 | 0.283746 |
| -0.1304  | 0.162237 | 0.215337 | 0.30656  | 0.00168  | -0.28922 | 0.236829 | 0.412825 | 0.205408 |
| -0.27879 | 0.311435 | 0.0464   | 0.728009 | 0.284898 | 0.673455 | 0.343737 | 0.469262 | 0.308822 |
| -0.10582 | 0.326802 | -0.19297 | 0.597851 | 0.29587  | 0.512979 | 0.258602 | 0.443146 | 0.45442  |
| -0.25181 | 0.234136 | -0.21541 | 0.58593  | 0.270386 | 0.494178 | 0.239718 | 0.466755 | 0.543658 |
| -0.28301 | 0.319509 | -0.21642 | 0.586105 | 0.339482 | 0.558448 | 0.25643  | 0.488129 | 0.574266 |
| 0.133868 | 0.13241  | 0.173983 | 0.416387 | 0.343155 | 0.256921 | 0.065689 | 0.343642 | 0.475623 |

| TCGA-HZ-8 | TCGA-HZ-8 | TCGA-HZ-8 | TCGA-HZ-A | TCGA-HZ-A | TCGA-HZ-A | TCGA-HZ-A | TCGA-IB-7 | TCGA-IB-7 |
|-----------|-----------|-----------|-----------|-----------|-----------|-----------|-----------|-----------|
| 0.338897  | -0.02138  | -0.06767  | -0.4353   | -0.02627  | -0.17766  | -0.30394  | -0.0714   | 0.325649  |
| -0.16402  | 0.037623  | 0.039731  | -0.53266  | -0.1742   | -0.13566  | -0.21436  | 0.372703  | 0.394324  |
| 0.413505  | -0.1791   | 0.46048   | 0.233312  | 0.156963  | 0.19151   | 0.184931  | 0.293923  | 0.265448  |
| 0.032865  | -0.48918  | -0.18556  | -0.03915  | 0.602819  | -0.40787  | -0.3552   | 0.183513  | 0.300192  |
| 0.077387  | -0.21355  | -0.00621  | 0.181104  | 0.324647  | -0.20621  | -0.03586  | -0.07998  | -0.11756  |
| 0.263521  | -0.11042  | -0.31865  | 0.02474   | -0.04956  | 0.196415  | 0.066538  | 0.066553  | -0.10134  |
| 0.064594  | -0.18422  | -0.01093  | -0.54963  | -0.45608  | 0.227758  | 0.020506  | -0.40855  | -0.25523  |
| 0.074294  | -0.13677  | -0.39997  | 0.025607  | -0.17877  | 0.167835  | 0.096572  | -0.15937  | -0.22069  |
| 0.356682  | -0.38341  | -0.07115  | 0.154403  | 0.096505  | 0.253381  | -0.20456  | 0.108122  | -0.02194  |
| 0.168229  | -0.31309  | -0.2334   | 0.337805  | 0.152051  | 0.121051  | -0.34212  | -0.02668  | -0.13166  |
| 0.451265  | -0.41661  | -0.09347  | 0.294735  | 0.020496  | 0.252621  | -0.03509  | -0.00871  | -0.14689  |
| 0.44471   | -0.40058  | -0.06079  | 0.29976   | 0.226048  | 0.099204  | -0.14805  | -0.01489  | -0.21331  |
| 0.063344  | 0.163916  | 0.086433  | -0.18186  | -0.09089  | 0.023799  | -0.03851  | 0.013917  | 0.38749   |
| 0.068526  | -0.18768  | 0.035123  | -0.17781  | 0.04467   | 0.009176  | 0.366766  | -0.25943  | -0.09252  |
| 0.087977  | 0.007435  | 0.244141  | 0.239354  | 0.650502  | -0.27116  | -0.47231  | 0.213946  | 0.050354  |
| 0.355353  | 0.227527  | 0.126273  | 0.207627  | 0.488743  | -0.40043  | -0.28734  | -0.05922  | 0.116409  |
| 0.116026  | 0.125319  | 0.347387  | -0.28857  | -0.12816  | 0.118859  | 0.424392  | 0.073931  | 0.162305  |
| 0.443552  | 0.022704  | -0.07824  | 0.140843  | 0.269697  | 0.030115  | 0.246553  | 0.210474  | 0.015928  |
| 0.144038  | -0.29854  | -0.33949  | -0.3254   | -0.172    | -0.07008  | -0.22726  | -0.15723  | 0.074853  |
| -0.32999  | -0.28015  | 0.002044  | -0.26769  | -0.67458  | 0.652906  | 0.257629  | -0.21701  | 0.067188  |
| -0.10072  | -0.13858  | -0.02327  | -0.03275  | 0.117368  | 0.041388  | 0.246252  | 0.124584  | 0.07826   |
| -0.10402  | 0.332553  | 0.584605  | -0.28819  | -0.48681  | 0.337445  | -0.20454  | 0.489289  | 0.536164  |
| -0.23161  | -0.33181  | -0.00591  | -0.20471  | -0.20131  | -0.00119  | -0.08381  | -0.10386  | -0.11015  |
| -0.3782   | -0.01176  | 0.077658  | -0.1942   | 0.303403  | -0.36523  | -0.28299  | 0.349818  | 0.405605  |
| 0.084418  | 0.195818  | -0.32935  | 0.401979  | 0.025369  | 0.150289  | 0.221116  | -0.06983  | -0.3087   |
| 0.43162   | 0.152808  | -0.21952  | 0.404223  | 0.493241  | -0.21415  | -0.32842  | 0.341269  | -0.05481  |
| -0.02647  | -0.06169  | -0.27528  | -0.3851   | 0.267557  | -0.42383  | 0.450899  | 0.115728  | 0.097037  |
| 0.087523  | 0.226157  | 0.070523  | 0.067126  | -0.08026  | -0.00184  | 0.387832  | 0.216101  | -0.01855  |
| 0.64907   | -0.00485  | -0.23779  | 0.42307   | -0.19911  | 0.194648  | -0.19617  | 0.138481  | 0.058488  |
| -0.09945  | -0.14173  | 0.381872  | 0.036063  | 0.423551  | -0.0989   | -0.06056  | 0.261435  | 0.079584  |
| 0.068461  | 0.204718  | 0.310369  | 0.320549  | 0.482569  | -0.57688  | -0.48733  | 0.590939  | 0.512028  |
| -0.45307  | -0.01345  | -0.09238  | -0.36931  | 0.390974  | -0.41793  | -0.50679  | 0.269678  | -0.24872  |
| 0.341385  | 0.028403  | 0.263978  | 0.356622  | 0.461939  | -0.19905  | 0.143507  | 0.330393  | 0.039922  |
| 0.226744  | -0.11043  | 0.314556  | 0.258179  | 0.383534  | -0.30711  | 0.1072    | 0.274805  | 0.21518   |
| 0.347773  | 0.039529  | 0.216933  | 0.351395  | 0.472286  | -0.25291  | 0.11013   | 0.325814  | 0.033204  |
| 0.218481  | -0.23798  | 0.170542  | 0.337624  | -0.02211  | 0.056408  | -0.15948  | -0.04682  | -0.00372  |
| 0.497657  | 0.184264  | -0.50919  | 0.563737  | -0.28423  | 0.153087  | 0.098422  | 0.144057  | 0.117934  |
| -0.18608  | -0.43823  | -0.12622  | -0.06352  | 0.004725  | -0.09753  | 0.149379  | -0.19256  | -0.04489  |
| 0.358231  | -0.13922  | 0.081606  | 0.093122  | -0.08795  | 0.345541  | 0.469044  | 0.122774  | -0.03587  |
| 0.002238  | -0.32178  | -0.05654  | -0.08077  | -0.01097  | 0.152815  | 0.222913  | -0.09913  | 0.164836  |
| 0.250384  | -0.17387  | -0.01229  | -0.06429  | 0.299955  | -0.24326  | 0.006002  | 0.139026  | 0.190629  |
| 0.467243  | -0.14705  | -0.06778  | 0.409449  | -0.21613  | 0.442297  | 0.375252  | 0.023633  | 0.133741  |
| 0.479893  | -0.04345  | -0.3557   | 0.509919  | -0.16829  | 0.235292  | -0.0023   | 0.045243  | -0.05971  |
| 0.064143  | -0.41267  | 0.020539  | -0.66421  | -0.4476   | 0.492656  | 0.799173  | 0.010929  | 0.212602  |
| 0.447513  | 0.351872  | -0.1623   | -0.07276  | -0.09579  | -0.0803   | -0.41101  | 0.454437  | 0.518029  |
| 0.199888  | -0.2681   | -0.05067  | 0.017961  | 0.023731  | 0.255973  | 0.228931  | -0.01207  | 0.016505  |
| -0.17725  | 0.255264  | -0.48274  | 0.475876  | -0.25969  | 0.262651  | 0.106717  | -0.3025   | -0.24277  |
| 0.116578  | -0.02566  | -0.11742  | 0.091546  | -0.00255  | 0.175436  | -0.14299  | -0.0811   | -0.17008  |
| -0.01756  | -0.24611  | -0.14721  | 0.008892  | -0.11969  | 0.298503  | 0.012451  | -0.2409   | -0.37926  |

|          |          |          |          |          |          |          |          |          |
|----------|----------|----------|----------|----------|----------|----------|----------|----------|
| 0.343418 | 0.050966 | -0.31865 | 0.118217 | -0.28871 | 0.250589 | -0.1594  | -0.19113 | -0.30424 |
| 0.562442 | -0.30078 | -0.42277 | 0.096108 | -0.28574 | -0.29801 | -0.12249 | -0.15168 | 0.130865 |
| 0.37911  | -0.20127 | -0.06395 | -0.02954 | -0.11512 | 0.239022 | 0.058917 | 0.075942 | 0.024621 |
| 0.540625 | -0.16607 | -0.46817 | 0.433642 | -0.39259 | 0.083896 | 0.309696 | -0.0601  | 0.10733  |
| 0.248885 | 0.046419 | 0.024895 | 0.147554 | -0.39847 | 0.333615 | 0.023474 | -0.0352  | 0.185608 |
| 0.490552 | -0.0504  | -0.09    | 0.290199 | -0.13821 | 0.262004 | -0.21932 | -0.13006 | -0.10049 |
| 0.361517 | -0.28208 | -0.25426 | 0.092909 | -0.18282 | 0.41053  | 0.079231 | -0.14004 | 0.076384 |
| 0.228304 | -0.03977 | -0.33173 | 0.270535 | -0.16079 | -0.05676 | 0.175829 | -0.16618 | -0.20075 |
| 0.242401 | -0.11743 | -0.52182 | 0.410756 | -0.10794 | -0.15143 | -0.1473  | -0.1004  | -0.04045 |
| 0.285805 | 0.030459 | -0.22806 | 0.298599 | 0.068738 | 0.168444 | -0.10167 | 0.253303 | 0.12007  |
| 0.503635 | -0.00246 | -0.35861 | 0.412893 | -0.29979 | 0.051537 | -0.07898 | 0.336087 | 0.144475 |
| -0.06147 | -0.18016 | -0.06674 | 0.089254 | -0.10166 | -0.12829 | -0.38566 | -0.16778 | -0.20107 |
| 0.3063   | -0.21475 | -0.2598  | -0.25909 | -0.23925 | 0.122478 | 0.262759 | -0.25066 | -0.08299 |
| 0.309867 | -0.2735  | -0.33182 | 0.158713 | -0.12916 | -0.0832  | -0.01861 | -0.12274 | 0.111746 |
| 0.508603 | -0.16888 | 0.153677 | 0.075469 | 0.218667 | -0.02861 | 0.160653 | 0.065544 | 0.291187 |
| 0.089646 | -0.27716 | 0.098932 | -0.0981  | 0.252026 | 0.14577  | -0.09789 | 0.177371 | -0.07012 |
| -0.16616 | -0.19283 | 0.172202 | 0.098849 | 0.591964 | -0.58037 | -0.46821 | 0.021215 | 0.141518 |
| -0.07314 | 0.034912 | 0.06408  | -0.34724 | 0.168907 | -0.3136  | -0.16241 | -0.11068 | 0.053508 |
| -0.02118 | 0.115882 | 0.125325 | 0.161352 | 0.025792 | 0.074927 | 0.1353   | 0.101616 | 0.079844 |
| 0.319385 | -0.09223 | -0.39249 | 0.356374 | -0.15041 | 0.283012 | 0.217138 | -0.03347 | -0.22316 |
| 0.279478 | 0.160937 | -0.49578 | 0.182443 | -0.32559 | 0.319226 | 0.088049 | -0.25344 | -0.42808 |
| 0.637999 | -0.16114 | -0.45283 | 0.480463 | -0.34997 | 0.370743 | 0.361677 | 0.271783 | 0.105206 |
| 0.29231  | -0.06854 | -0.32036 | 0.336287 | -0.26747 | 0.339309 | 0.09968  | -0.08023 | -0.25947 |
| 0.183848 | -0.41569 | -0.29984 | -0.21487 | -0.46067 | 0.430875 | -0.07124 | -0.24159 | -0.00232 |
| 0.141767 | 0.337805 | -0.43925 | -0.44417 | 0.093934 | 0.295574 | 0.481897 | -0.46883 | -0.14975 |
| 0.429866 | -0.16337 | 0.181963 | 0.223124 | -0.00466 | 0.355007 | 0.090864 | 0.096416 | -0.06594 |
| 0.27077  | -0.16813 | -0.08662 | 0.178623 | -0.22335 | 0.11571  | 0.12824  | -0.25145 | -0.08744 |
| 0.232597 | -0.17201 | 0.020265 | 0.08033  | -0.40034 | 0.678201 | 0.684904 | 0.006562 | -0.03359 |
| 0.502567 | -0.04782 | -0.04168 | -0.12321 | -0.40139 | 0.36367  | -0.07247 | 0.069953 | 0.232778 |
| 0.08764  | 0.297591 | -0.23838 | -0.23596 | -0.05842 | 0.25851  | -0.00668 | 0.003049 | -0.25979 |
| 0.342802 | -0.25592 | -0.15092 | 0.37394  | -0.22584 | 0.196023 | 0.261897 | -0.0548  | 0.0517   |
| 0.356418 | -0.18468 | -0.03016 | 0.379501 | -0.24242 | 0.192989 | 0.230896 | 0.01273  | 0.041018 |
| 0.220279 | -0.28606 | -0.07077 | -0.09343 | -0.14856 | 0.097132 | 0.413766 | -0.26421 | -0.11087 |
| 0.314202 | -0.41694 | -0.30412 | 0.01029  | 0.07583  | 0.010578 | 0.516982 | 0.147531 | -0.24146 |
| 0.249501 | 0.227595 | -0.08379 | 0.072543 | 0.009932 | -0.02833 | -0.19002 | 0.33821  | 0.07676  |
| -0.3011  | 0.40547  | -0.5081  | 0.066701 | -0.54599 | 0.442545 | 0.483518 | -0.25629 | -0.70897 |
| -0.00263 | 0.05508  | -0.05938 | -0.37214 | -0.30147 | 0.257814 | -0.08868 | -0.03247 | -0.09305 |
| -0.45863 | 0.209348 | -0.22545 | 0.182803 | -0.40388 | 0.191998 | 0.152246 | 0.057634 | -0.37852 |
| 0.001596 | -0.5441  | -0.30106 | -0.15596 | -0.17508 | 0.309718 | 0.179163 | -0.61496 | -0.36274 |
| -0.33796 | 0.287442 | 0.059593 | -0.05798 | -0.31913 | 0.306875 | 0.156958 | -0.21449 | -0.32309 |
| -0.20748 | -0.31763 | -0.13298 | -0.10198 | 0.155531 | 0.063334 | -0.36081 | -0.00551 | -0.44119 |
| 0.61594  | 0.35546  | 0.205475 | -0.45256 | -0.28812 | 0.141772 | -0.50278 | -0.04889 | -0.07002 |
| 0.323352 | 0.066027 | -0.25448 | 0.221184 | 0.229528 | -0.091   | 0.004085 | 0.32699  | 0.065161 |
| -0.24042 | -0.50388 | -0.2868  | -0.2252  | -0.45205 | 0.328273 | 0.116265 | -0.52007 | -0.44588 |
| -0.18214 | -0.35337 | -0.26193 | 0.030413 | -0.26542 | 0.238847 | 0.231731 | -0.40162 | -0.09179 |
| 0.155815 | -0.32002 | -0.19896 | -0.26781 | -0.09507 | 0.229442 | 0.169493 | -0.44989 | -0.08654 |
| -0.25169 | -0.59111 | -0.32788 | -0.44749 | -0.34866 | 0.552942 | 0.061084 | -0.40912 | -0.29188 |
| 0.23232  | 0.097741 | 0.201128 | 0.101105 | 0.378495 | -0.23472 | -0.06692 | 0.344998 | 0.083957 |
| 0.338143 | 0.129433 | 0.30073  | 0.116382 | 0.182858 | -0.2647  | -0.01985 | 0.301742 | 0.260029 |
| 0.287459 | 0.203086 | 0.00846  | 0.434026 | 0.306909 | -0.11155 | -0.0879  | 0.317887 | 0.184549 |

|          |          |          |          |          |          |          |          |          |
|----------|----------|----------|----------|----------|----------|----------|----------|----------|
| 0.183477 | -0.08244 | 0.297682 | 0.033841 | 0.48213  | -0.35163 | -0.39845 | 0.456335 | 0.165507 |
| 0.087613 | 0.077903 | 0.310272 | 0.194456 | 0.441668 | -0.32662 | -0.3038  | 0.468482 | 0.299918 |
| -0.0328  | 0.201039 | 0.079999 | 0.35614  | 0.163929 | 0.0424   | 0.138951 | 0.187781 | -0.02087 |
| 0.145031 | 0.282731 | -0.00714 | 0.323141 | 0.32215  | -0.22734 | -0.00144 | 0.315657 | 0.327632 |
| 0.256968 | -0.16849 | 0.017762 | -0.30175 | -0.25154 | -0.03006 | 0.092044 | -0.10596 | -0.01674 |
| 0.353844 | 0.053987 | 0.037922 | 0.149879 | -0.12279 | -0.05016 | -0.16685 | 0.124711 | 0.004698 |
| 0.02408  | -0.37587 | 0.046496 | -0.41265 | 0.126007 | 0.003513 | 0.007442 | 0.041781 | -0.14101 |
| 0.042106 | 0.155948 | 0.133601 | -0.10683 | -0.16773 | 0.076803 | -0.06945 | 0.132584 | 0.103619 |
| 0.20115  | 0.273788 | -0.01503 | 0.390494 | 0.04938  | -0.07424 | -0.04701 | -0.04792 | 0.187942 |
| -0.02023 | -0.02175 | 0.181507 | -0.06933 | 0.28345  | -0.16652 | -0.01158 | 0.152896 | -0.00039 |
| 0.192464 | -0.36597 | -0.28333 | 0.107298 | -0.31633 | 0.150361 | 0.180887 | -0.27461 | 0.070026 |
| 0.156934 | 0.214878 | 0.078078 | 0.352646 | 0.16281  | -0.33822 | -0.28786 | 0.235334 | 0.117046 |
| 0.227246 | -0.13993 | 0.230429 | -0.07718 | 0.380536 | -0.13129 | -0.03721 | 0.338167 | 0.147163 |
| 0.412825 | 0.262239 | 0.013384 | 0.48775  | 0.357333 | -0.01135 | -0.16343 | 0.273934 | -0.00187 |
| 0.117859 | 0.065378 | 0.272856 | 0.05073  | 0.26329  | -0.2067  | -0.15519 | 0.273282 | 0.251925 |
| 0.30648  | 0.313919 | 0.419653 | 0.154312 | 0.302775 | -0.08601 | -0.18358 | 0.474818 | 0.430779 |
| -0.27651 | 0.072832 | 0.414361 | -0.17841 | -0.02469 | -0.01907 | -0.05231 | -0.14894 | 0.189449 |
| -0.09067 | -0.05667 | 0.303681 | -0.01771 | 0.346627 | -0.28615 | -0.22707 | 0.273525 | 0.29916  |
| 0.291584 | 0.196228 | 0.394658 | 0.056844 | 0.429761 | -0.38472 | -0.2655  | 0.497212 | 0.356705 |
| 0.101348 | 0.027809 | 0.24392  | 0.019251 | 0.24005  | -0.31348 | 0.080063 | 0.263548 | 0.239817 |
| 0.14902  | -0.0894  | 0.186171 | 0.080707 | 0.329643 | -0.19031 | -0.11889 | 0.378737 | 0.033163 |
| 0.334986 | 0.051166 | 0.440063 | 0.213766 | 0.428526 | -0.42493 | -0.18726 | 0.441145 | 0.341886 |
| 0.459218 | 0.017963 | 0.52424  | 0.275936 | 0.548313 | -0.55358 | -0.14256 | 0.449156 | 0.266205 |
| 0.009195 | 0.189454 | 0.368569 | 0.055855 | 0.491088 | -0.58182 | -0.37734 | 0.500466 | 0.347015 |
| 0.208409 | -0.01889 | 0.396641 | -0.0731  | 0.255624 | -0.35597 | -0.02203 | 0.434956 | 0.341265 |
| 0.228776 | -0.15041 | 0.234647 | -0.02547 | 0.104941 | -0.06751 | 0.160527 | 0.112483 | 0.116696 |
| 0.361846 | 0.13189  | 0.126694 | 0.392141 | 0.315465 | -0.04006 | -0.08092 | 0.300144 | 0.2044   |
| 0.499137 | 0.214539 | 0.054925 | 0.262354 | 0.423978 | -0.41846 | -0.42581 | 0.462458 | 0.254904 |
| -0.41713 | 0.299541 | 0.198581 | -0.09688 | 0.277054 | -0.32243 | -0.56829 | 0.51919  | 0.282541 |
| -0.03338 | 0.087879 | 0.369184 | -0.0409  | 0.422637 | -0.27136 | -0.32043 | 0.388386 | 0.247128 |
| 0.17975  | 0.108152 | 0.512366 | -0.18014 | 0.289804 | -0.16858 | -0.29708 | 0.535515 | 0.368098 |
| -0.1598  | -0.02151 | 0.10726  | -0.00219 | 0.165238 | -0.02292 | -0.17336 | 0.047187 | -0.09463 |
| -0.17514 | 0.23397  | -0.15251 | 0.085759 | 0.167821 | 0.113899 | -0.24016 | 0.227673 | -0.34478 |
| 0.072351 | 0.221465 | 0.273459 | 0.048573 | 0.404921 | -0.25777 | -0.17087 | 0.449231 | 0.154251 |
| 0.12197  | 0.139789 | 0.364618 | 0.007429 | 0.599555 | -0.47612 | -0.40544 | 0.528892 | 0.22242  |
| -0.1073  | -0.01963 | 0.206214 | -0.12441 | 0.459906 | -0.2897  | -0.37152 | 0.456659 | 0.194415 |
| 0.03023  | 0.096006 | 0.380719 | -0.15617 | 0.393441 | -0.2751  | -0.2069  | 0.497792 | 0.292684 |
| 0.033325 | 0.005938 | 0.31147  | -0.06782 | 0.471012 | -0.27282 | -0.27877 | 0.453271 | 0.309915 |
| 0.188104 | 0.026943 | 0.294477 | 0.043064 | 0.307145 | -0.1856  | -0.26066 | 0.409259 | 0.320627 |
| -0.15134 | -0.0779  | 0.29126  | 0.092042 | 0.367807 | -0.16768 | -0.135   | 0.329138 | 0.2558   |
| 0.053761 | 0.044913 | 0.39995  | 0.033374 | 0.413744 | -0.38186 | -0.23598 | 0.40895  | 0.311156 |
| -0.07952 | -0.01547 | 0.217906 | -0.06786 | 0.463215 | -0.54048 | -0.53357 | 0.501083 | 0.343691 |
| 0.219882 | 0.191216 | 0.123793 | 0.312778 | 0.231877 | -0.01908 | -0.19902 | 0.391175 | 0.068421 |
| 0.200237 | 0.162387 | 0.298758 | 0.141612 | 0.335519 | -0.30552 | -0.16454 | 0.436762 | 0.243788 |
| 0.328682 | 0.257166 | 0.170822 | 0.31289  | 0.271579 | -0.01784 | -0.14719 | 0.279578 | 0.218451 |
| 0.275952 | 0.235901 | 0.21829  | 0.28281  | 0.197038 | 0.052868 | 0.24135  | 0.134535 | 0.067592 |
| 0.101392 | 0.109532 | 0.320772 | 0.202474 | 0.362344 | -0.26867 | -0.06451 | 0.351352 | 0.24864  |
| 0.292978 | 0.109704 | 0.061987 | 0.272512 | 0.173717 | -0.24319 | 0.011573 | 0.264676 | 0.044253 |
| 0.333122 | 0.031947 | 0.120317 | 0.233164 | 0.25667  | 0.045696 | -0.20773 | 0.247285 | 0.07211  |
| 0.304445 | 0.045704 | 0.044194 | 0.166266 | 0.030835 | -0.27787 | -0.23081 | 0.143165 | 0.099847 |

|          |          |          |          |          |          |          |          |          |
|----------|----------|----------|----------|----------|----------|----------|----------|----------|
| 0.207631 | 0.153489 | 0.236223 | 0.332109 | 0.304985 | -0.23714 | -0.13066 | 0.11796  | 0.11253  |
| 0.227588 | 0.166876 | -0.02642 | 0.377967 | 0.253002 | -0.11271 | -0.02679 | 0.287249 | 0.132176 |
| 0.196794 | 0.349736 | 0.247976 | 0.100686 | 0.074782 | -0.3157  | -0.19101 | 0.405441 | 0.370805 |
| -0.39557 | 0.14929  | 0.300842 | -0.36067 | 0.359127 | -0.44594 | -0.60353 | 0.553485 | 0.267657 |
| 0.350395 | 0.2682   | -0.20154 | 0.151849 | -0.54505 | 0.252831 | -0.41392 | -0.31444 | 0.285041 |
| 0.320734 | 0.189681 | 0.072862 | 0.279266 | 0.025321 | -0.38292 | 0.08392  | 0.37789  | 0.359588 |
| 0.462816 | 0.352283 | 0.217511 | 0.390672 | 0.281645 | -0.12024 | 0.157767 | 0.142322 | 0.192558 |
| 0.143462 | 0.192034 | -0.25517 | 0.354431 | -0.07367 | 0.3108   | -0.00808 | -0.06787 | -0.18436 |
| 0.052524 | 0.192503 | -0.50092 | 0.562413 | -0.25761 | 0.349411 | -0.02815 | -0.30211 | -0.32215 |
| 0.105634 | -0.09114 | -0.01912 | -0.07117 | 0.188255 | 0.154412 | 0.236031 | 0.308543 | 0.099413 |
| 0.002354 | 0.065077 | -0.28844 | 0.360884 | -0.25167 | 0.335525 | 0.016787 | -0.25609 | -0.11579 |
| 0.211208 | 0.445163 | 0.0508   | 0.257989 | 0.475814 | -0.30304 | -0.12006 | 0.552839 | 0.293219 |
| -0.02785 | 0.131057 | 0.045042 | -0.06627 | 0.296194 | -0.09032 | 0.073176 | 0.242765 | 0.34036  |
| 0.032351 | 0.225091 | 0.217899 | -0.14132 | 0.369648 | -0.04756 | -0.01811 | 0.416487 | 0.351861 |
| -0.18209 | -0.02951 | 0.435662 | -0.07482 | 0.552135 | -0.55483 | -0.4566  | 0.610063 | 0.534757 |
| 0.144148 | -0.00012 | 0.290902 | 0.01797  | 0.308335 | -0.29497 | -0.11404 | 0.332305 | 0.191643 |
| 0.142074 | -0.02149 | 0.298787 | 0.047687 | 0.354992 | -0.35622 | -0.18328 | 0.368588 | 0.332206 |
| 0.231653 | 0.22156  | 0.30378  | 0.06461  | 0.14066  | -0.32842 | -0.26839 | 0.499336 | 0.305727 |
| 0.165602 | -0.13266 | 0.27672  | -0.04826 | 0.296103 | -0.29284 | -0.00971 | 0.382672 | 0.342087 |
| 0.187262 | 0.098756 | 0.293697 | 0.056269 | 0.237526 | -0.38251 | -0.08771 | 0.370434 | 0.478919 |
| 0.338509 | 0.034682 | 0.339717 | 0.193228 | 0.287024 | -0.2361  | -0.08209 | 0.460369 | 0.202222 |
| 0.336387 | -0.02587 | 0.25345  | 0.045551 | 0.275008 | -0.25101 | -0.20134 | 0.407938 | 0.366188 |
| 0.002395 | 0.036951 | 0.302623 | -0.13446 | -0.02451 | -0.17898 | 0.295043 | 0.392189 | 0.189773 |
| -0.23194 | -0.18648 | 0.337827 | 0.027393 | 0.297335 | -0.35729 | -0.33115 | -0.00647 | 0.273048 |
| 0.320455 | 0.009417 | 0.255617 | 0.145449 | 0.371634 | -0.33865 | -0.08535 | 0.376935 | 0.352803 |
| 0.301273 | -0.33152 | 0.199265 | -0.08397 | 0.101295 | -0.23069 | -0.11139 | 0.302901 | 0.00457  |
| 0.163428 | 0.03241  | 0.261465 | 0.082959 | 0.277396 | -0.28077 | 0.125335 | 0.449678 | 0.267614 |
| -0.07779 | 0.032872 | 0.137419 | 0.200198 | 0.361769 | -0.36308 | -0.19043 | 0.415727 | 0.237295 |
| 0.274614 | -0.02569 | 0.293272 | -0.08241 | 0.223551 | -0.25681 | 0.115936 | 0.371667 | 0.150763 |
| 0.048679 | 0.025008 | 0.116964 | -0.01441 | 0.110568 | -0.29001 | 0.08512  | 0.334163 | 0.283589 |
| -0.08399 | 0.097614 | 0.473876 | 0.096239 | 0.469383 | -0.63718 | -0.57183 | 0.700223 | 0.345084 |
| -0.33952 | 0.208645 | 0.24724  | -0.09413 | 0.555925 | -0.50409 | -0.59355 | 0.555878 | 0.243236 |
| -0.44518 | 0.019194 | 0.324413 | -0.32624 | 0.536987 | -0.54975 | -0.64377 | 0.627902 | 0.31792  |
| -0.20629 | 0.072595 | 0.214754 | -0.27561 | 0.569923 | -0.51908 | -0.67415 | 0.689814 | 0.242856 |
| -0.14337 | -0.07143 | 0.424571 | -0.01508 | 0.464186 | -0.42575 | -0.34795 | 0.482007 | 0.274838 |



| TCGA-IB-7 | TCGA-IB-7 | TCGA-IB-7 | TCGA-IB-7 | TCGA-IB-7 | TCGA-IB-A | TCGA-IB-A | TCGA-IB-A | TCGA-IB-A |
|-----------|-----------|-----------|-----------|-----------|-----------|-----------|-----------|-----------|
| 0.210878  | 0.231624  | 0.272191  | 0.268903  | -0.20851  | -0.30061  | 0.184411  | 0.215973  | 0.169839  |
| -0.48638  | -0.16751  | 0.102069  | 0.191766  | -0.15135  | 0.297096  | 0.003292  | -0.16451  | 0.21906   |
| 0.404054  | 0.34562   | 0.384009  | 0.149747  | -0.02451  | 0.481815  | -0.10937  | -0.46382  | -0.13853  |
| -0.2712   | 0.009784  | -0.00702  | 0.136078  | -0.32697  | 0.187882  | -0.00779  | -0.26213  | -0.29899  |
| -0.3121   | 0.019285  | 0.30948   | 0.165359  | -0.3967   | 0.122147  | 0.2335    | -0.32122  | -0.37581  |
| 0.034486  | 0.075393  | -0.25655  | -0.25112  | -0.05956  | -0.03111  | -0.09393  | -0.15512  | -0.08098  |
| -0.16564  | -0.39766  | 0.133054  | -0.17944  | -0.35933  | -0.17278  | -0.47195  | -0.11576  | -0.31627  |
| -0.05156  | -0.13754  | -0.2549   | -0.24129  | -0.2168   | -0.04395  | -0.05798  | 0.105074  | 0.056042  |
| 0.085382  | 0.08993   | -0.17614  | -0.09962  | -0.00944  | -0.15218  | -0.04764  | 0.153759  | 0.201394  |
| -0.13524  | 0.015575  | -0.33563  | -0.19955  | -0.24095  | 0.235359  | -0.04101  | -0.03882  | 0.296816  |
| -0.02852  | -0.05745  | -0.3431   | -0.27972  | -0.15151  | -0.11072  | -0.08309  | 0.060035  | 0.341528  |
| -0.09828  | -0.04919  | -0.31454  | -0.20538  | -0.03643  | -0.06378  | 0.117216  | 0.28398   | 0.462958  |
| 0.324388  | -0.07053  | 0.092256  | -0.06589  | -0.15669  | -0.18992  | -0.28353  | -0.27905  | -0.26431  |
| 0.14468   | 0.24061   | 0.035254  | 0.061911  | -0.28062  | -0.02376  | -0.18158  | 0.004064  | -0.02328  |
| -0.18224  | 0.158247  | 0.386562  | 0.112911  | -0.20898  | 0.231565  | 0.218274  | -0.15024  | -0.4807   |
| 0.18699   | 0.373859  | 0.412721  | 0.184467  | -0.21071  | -0.09061  | 0.280136  | -0.31731  | -0.21209  |
| -0.04868  | 0.194363  | 0.178539  | 0.321988  | -0.0756   | -0.25599  | -0.30737  | 0.00766   | -0.10274  |
| -0.07143  | 0.355819  | -0.22287  | -0.08845  | 0.057567  | 0.221577  | 0.095424  | 0.098274  | 0.118899  |
| 0.015418  | -0.16869  | -0.36819  | -0.26288  | -0.07184  | -0.20559  | 0.244488  | -0.00931  | 0.354094  |
| 0.197828  | 0.082319  | -0.34043  | -0.06186  | -0.58094  | -0.46513  | -0.01339  | -0.12458  | 0.013098  |
| 0.226651  | 0.117808  | 0.442496  | 0.391799  | -0.02215  | -0.07388  | 0.130425  | 0.025647  | -0.29984  |
| -0.0439   | 0.102664  | 0.476895  | 0.416113  | 0.221107  | 0.226143  | -0.03849  | 0.024341  | -0.36015  |
| 0.188782  | -0.06466  | 0.104058  | -0.13332  | -0.15891  | 0.075462  | 0.034306  | -0.10448  | 0.081217  |
| 0.074551  | 0.04778   | 0.223116  | 0.038323  | -0.03001  | 0.296342  | 0.072608  | -0.33882  | -0.30267  |
| -0.25081  | 0.076794  | -0.283    | -0.11384  | -0.15457  | -0.01316  | -0.00947  | -0.18799  | -0.14513  |
| -0.19004  | 0.530514  | 0.387625  | -0.01     | 0.313699  | 0.130753  | 0.440685  | -0.45154  | -0.17083  |
| -0.18315  | -0.38979  | 0.38679   | 0.134534  | 0.123211  | 0.355924  | -0.47785  | 0.132084  | -0.09957  |
| -0.15988  | 0.063878  | -0.0595   | -0.13737  | 0.342683  | 0.267831  | 0.001696  | -0.10531  | 0.306923  |
| -0.16408  | -0.10406  | -0.41608  | -0.30935  | -0.02731  | -0.02827  | -0.23806  | 0.277515  | 0.398625  |
| -0.20329  | 0.153115  | 0.214524  | 0.27883   | 0.115499  | 0.139067  | 0.253205  | -0.08779  | -0.4185   |
| -0.15356  | 0.616331  | -0.01183  | 0.161959  | 0.480914  | 0.394573  | 0.519998  | -0.23974  | -0.18976  |
| -0.23196  | 0.461288  | -0.44154  | -0.24517  | 0.232607  | 0.374786  | 0.608586  | 0.017684  | -0.03216  |
| 0.086914  | 0.274938  | 0.328772  | 0.287007  | 0.215494  | 0.171771  | 0.090058  | -0.25074  | -0.27228  |
| 0.190224  | 0.20612   | 0.446581  | 0.343877  | 0.305825  | 0.291905  | -0.00899  | -0.23141  | -0.40866  |
| 0.099241  | 0.292163  | 0.306938  | 0.252066  | 0.329642  | 0.274993  | 0.18446   | -0.25427  | -0.17991  |
| -0.38329  | 0.017143  | 0.052761  | 0.065204  | -0.21983  | -0.02077  | -0.22968  | -0.23313  | -0.21358  |
| -0.25557  | 0.175357  | -0.43975  | 0.00458   | -0.16896  | -0.33817  | 0.1714    | 0.114132  | 0.340235  |
| -0.52989  | 0.044495  | -0.36474  | 0.162062  | -0.39596  | -0.27708  | -0.10299  | 0.101772  | -0.13944  |
| 0.028537  | 0.240238  | -0.2527   | 0.317509  | -0.03972  | -0.2396   | -0.39663  | -0.5018   | -0.18149  |
| -0.34394  | 0.274393  | 0.052972  | -0.08588  | -0.31638  | 0.027889  | -0.39413  | -0.1819   | -0.25519  |
| -0.32884  | 0.226483  | 0.275529  | 0.244876  | -0.10014  | 0.389987  | -0.2021   | -0.26205  | -0.37456  |
| 0.042337  | 0.208362  | 0.044351  | 0.143507  | 0.051801  | -0.23254  | -0.39475  | -0.42159  | -0.056    |
| -0.05787  | 0.162559  | -0.21703  | -0.09952  | 0.004658  | -0.20912  | -0.20172  | 0.079575  | 0.497703  |
| 0.257192  | 0.101575  | -0.47759  | -0.18126  | -0.41975  | -0.26379  | -0.0707   | 0.402674  | 0.27019   |
| -0.09473  | 0.620718  | -0.32331  | 0.106957  | 0.278641  | -0.24028  | 0.191099  | -0.3445   | 0.38333   |
| 0.073085  | 0.178761  | -0.09802  | 0.115064  | -0.17888  | -0.21762  | -0.20083  | -0.2125   | -0.07327  |
| -0.49931  | -0.2684   | -0.50646  | -0.40801  | -0.46292  | -0.34205  | -0.12681  | -0.22239  | -0.08835  |
| -0.12272  | 0.146203  | -0.10418  | 0.116297  | -0.11596  | -0.18993  | 0.055681  | -0.04242  | -0.01551  |
| -0.25461  | -0.05024  | -0.2247   | 0.17864   | -0.33083  | -0.35722  | -0.05933  | 0.107865  | -0.22456  |

|          |          |          |          |          |          |          |          |          |
|----------|----------|----------|----------|----------|----------|----------|----------|----------|
| -0.08198 | 0.122127 | -0.37334 | -0.23763 | -0.16523 | -0.20247 | -0.22142 | 0.023433 | 0.226406 |
| 0.141163 | 0.033427 | -0.42055 | -0.02565 | -0.19577 | -0.199   | -0.27997 | 0.310024 | 0.537751 |
| 0.128949 | -0.00184 | -0.03618 | 0.297385 | -0.05575 | -0.19699 | -0.12976 | 0.104346 | 0.198093 |
| -0.03612 | 0.060052 | -0.36188 | -0.24797 | -0.13971 | -0.24439 | -0.31443 | 0.149309 | 0.523653 |
| 0.14317  | -0.00444 | 0.087326 | 0.107383 | 0.145526 | -0.33182 | 0.132861 | 0.112429 | 0.433989 |
| -0.09375 | 0.131964 | -0.29685 | -0.23342 | -0.33748 | -0.10921 | -0.23702 | -0.10719 | 0.155709 |
| -0.29659 | -0.08816 | -0.3742  | -0.33953 | -0.24331 | -0.28926 | -0.18064 | -0.02988 | 0.270258 |
| -0.39509 | -0.15249 | -0.33179 | -0.18112 | -0.18433 | -0.16293 | -0.29588 | 0.056351 | 0.147983 |
| -0.52401 | -0.16422 | -0.42968 | -0.38962 | -0.28735 | -0.14524 | -0.24701 | -0.05061 | 0.093567 |
| 0.017894 | 0.400864 | -0.29853 | -0.17005 | 0.138511 | 0.154209 | -0.05259 | -0.13368 | 0.263932 |
| -0.07739 | 0.095936 | -0.08504 | -0.0088  | 0.257693 | -0.23737 | 0.134728 | -0.20557 | 0.328466 |
| -0.53241 | -0.07019 | -0.39688 | -0.54137 | -0.09952 | 0.433575 | -0.20809 | 0.33301  | 0.434048 |
| 0.032028 | -0.11888 | -0.40496 | -0.08529 | -0.18078 | -0.35934 | -0.29939 | 0.173248 | 0.496205 |
| -0.30513 | 0.150084 | -0.44952 | -0.08877 | -0.20299 | -0.11571 | -0.16265 | -0.24464 | -0.06422 |
| 0.064305 | 0.151519 | 0.159655 | 0.33875  | 0.129293 | -0.03395 | -0.30329 | -0.18458 | -0.1914  |
| -0.16598 | 0.314877 | 0.132231 | 0.26628  | -0.13115 | -0.01278 | 0.174413 | -0.51782 | -0.21051 |
| 0.151362 | -0.00172 | 0.494457 | 0.466159 | -0.18151 | 0.557118 | 0.399546 | -0.25559 | -0.37383 |
| 0.091067 | -0.12239 | 0.392192 | 0.338657 | -0.1123  | 0.33781  | -0.28203 | -0.31806 | -0.13666 |
| -0.15217 | 0.1775   | 0.270972 | -0.03516 | 0.150755 | 0.05114  | 0.137407 | 0.043882 | 0.226661 |
| -0.2243  | 0.10511  | -0.23661 | -0.15032 | -0.20761 | -0.308   | -0.14175 | -0.03672 | 0.162296 |
| -0.37664 | -0.26943 | -0.41129 | -0.25699 | -0.39929 | -0.50679 | 0.102426 | 0.25691  | 0.079019 |
| 0.15309  | 0.243406 | 0.003935 | -0.05533 | 0.001935 | -0.37545 | 0.052232 | 0.06079  | 0.516626 |
| -0.0957  | 0.396964 | -0.38909 | -0.20516 | -0.04986 | -0.12627 | -0.25882 | -0.22975 | 0.355242 |
| -0.20583 | -0.07286 | -0.29147 | 0.217346 | -0.35853 | -0.13875 | -0.12114 | 0.341923 | -0.03041 |
| -0.34561 | -0.10303 | -0.28147 | -0.00655 | -0.39915 | -0.02369 | 0.256363 | 0.215228 | -0.33477 |
| 0.084541 | 0.067669 | -0.15518 | 0.005454 | -0.04127 | -0.09393 | -0.24042 | -0.37187 | -0.17279 |
| -0.13993 | -0.12147 | -0.16439 | 0.17725  | -0.3846  | -0.2648  | -0.33401 | -0.35904 | -0.23748 |
| -0.15887 | 0.11156  | -0.59208 | -0.18527 | -0.32294 | -0.26965 | 0.351763 | -0.11554 | 0.17091  |
| -0.18874 | 0.150737 | -0.06878 | -0.18478 | 0.012463 | 0.151605 | -0.25442 | 0.171009 | 0.370931 |
| -0.05056 | 0.200662 | -0.0502  | 0.232215 | -0.06667 | 0.156449 | 0.003155 | -0.09404 | 0.018744 |
| 0.008009 | 0.132501 | -0.3438  | -0.06445 | -0.03653 | -0.12998 | -0.3545  | -0.17316 | 0.056165 |
| 0.025121 | 0.166707 | -0.30913 | -0.14459 | 0.02675  | -0.09412 | -0.31484 | -0.19566 | 0.209132 |
| -0.12603 | -0.0753  | -0.10656 | -0.03228 | -0.27879 | -0.19931 | -0.31819 | -0.25566 | -0.18318 |
| -0.16355 | 0.093111 | 0.006077 | 0.301003 | -0.11531 | -0.36968 | -0.34145 | 0.160824 | -0.18122 |
| 0.235622 | 0.064861 | -0.19803 | -0.14479 | 0.202502 | 0.171989 | 0.108722 | -0.10347 | -0.10474 |
| -0.54444 | 0.303933 | -0.57721 | -0.26673 | -0.13858 | -0.31824 | 0.520259 | 0.664321 | 0.618573 |
| -0.15922 | -0.09479 | 0.116298 | 0.15329  | 0.039482 | -0.41169 | -0.02077 | -0.05102 | -0.20024 |
| 0.194217 | 0.04731  | -0.33125 | 0.01369  | -0.28146 | -0.5179  | 0.365626 | 0.213865 | 0.069255 |
| -0.51185 | -0.19787 | -0.04962 | 0.408783 | -0.40989 | -0.42776 | -0.06795 | 0.087967 | -0.48253 |
| -0.32384 | -0.23335 | -0.28527 | -0.04756 | 0.100062 | -0.22727 | 0.062819 | 0.118981 | 0.172948 |
| -0.47623 | 0.18726  | -0.42649 | 0.188382 | -0.2966  | -0.34875 | 0.218136 | -0.2429  | -0.467   |
| 0.272599 | 0.568412 | 0.320481 | 0.319035 | 0.239856 | -0.60426 | -0.19256 | 0.394264 | 0.634727 |
| -0.08021 | 0.291884 | -0.21561 | -0.14245 | 0.230501 | -0.15395 | 0.23238  | -0.27859 | -0.08198 |
| -0.3743  | -0.40557 | -0.348   | -0.12325 | -0.57008 | -0.10407 | -0.0698  | 0.261838 | -0.25596 |
| -0.40678 | -0.04129 | 0.160136 | 0.21016  | -0.1811  | -0.38955 | -0.28322 | 0.163517 | -0.27638 |
| -0.50926 | 0.07478  | 0.085163 | 0.387854 | -0.04075 | -0.47414 | -0.15413 | 0.051564 | -0.43212 |
| -0.40689 | -0.25985 | 0.129305 | 0.319284 | -0.42133 | -0.33238 | 0.149824 | -0.05735 | -0.61697 |
| 0.172146 | 0.216834 | 0.154219 | 0.133074 | 0.250836 | 0.180258 | 0.147089 | -0.05626 | -0.11659 |
| 0.302455 | 0.265428 | 0.29399  | 0.238735 | 0.285391 | 0.221221 | 0.059894 | 0.136899 | 0.06806  |
| 0.02967  | 0.312907 | 0.02565  | 0.082684 | 0.312262 | 0.216855 | 0.221546 | -0.24342 | -0.058   |

|          |          |          |          |          |          |          |          |          |
|----------|----------|----------|----------|----------|----------|----------|----------|----------|
| -0.16646 | 0.384611 | -0.14184 | 0.043564 | 0.277875 | 0.316007 | 0.312117 | -0.10391 | -0.12968 |
| -0.05216 | 0.385665 | -0.08776 | 0.046238 | 0.382693 | 0.225642 | 0.423165 | -0.19035 | -0.10914 |
| -0.04915 | 0.21217  | 0.204135 | -0.0915  | 0.179987 | 0.2383   | 0.249715 | -0.08113 | 0.10264  |
| 0.089994 | 0.362677 | 0.105607 | 0.022306 | 0.301288 | 0.225006 | 0.186421 | -0.17133 | 0.116372 |
| -0.21521 | -0.10917 | 0.188806 | 0.364507 | 0.078128 | -0.16843 | 0.057635 | 0.013165 | -0.47114 |
| -0.11447 | 0.080301 | 0.139454 | 0.20924  | 0.322063 | -0.06767 | 0.057565 | -0.13    | -0.30186 |
| -0.3389  | -0.07837 | 0.063709 | 0.136802 | -0.1419  | 0.10336  | -0.07401 | 0.013854 | -0.3448  |
| 0.248023 | -0.0178  | 0.197067 | 0.175757 | 0.186653 | -0.26742 | 0.173865 | 0.136144 | -0.11855 |
| 0.039522 | -0.07827 | 0.086736 | -0.10278 | 0.069694 | 0.180963 | -0.25281 | -0.00935 | 0.267395 |
| 0.260206 | 0.060953 | 0.253316 | 0.028436 | 0.058989 | 0.104826 | 0.049232 | -0.12861 | -0.1613  |
| 0.008781 | -0.04544 | -0.27888 | -0.22669 | -0.27644 | -0.38411 | -0.3063  | -0.00072 | 0.185344 |
| 0.219302 | 0.153409 | 0.124427 | 0.057417 | 0.230349 | 0.097499 | 0.182614 | 0.103555 | 0.181208 |
| -0.15093 | 0.238159 | -0.14371 | -0.05339 | 0.203043 | 0.013524 | 0.316496 | -0.00435 | -0.18527 |
| 0.079692 | 0.265179 | -0.00896 | 0.017553 | 0.37176  | 0.215517 | 0.297065 | -0.12729 | 0.190545 |
| 0.249936 | 0.089476 | 0.276302 | 0.204698 | 0.228572 | 0.128243 | 0.105256 | 0.033401 | -0.19155 |
| 0.359472 | 0.320237 | 0.27928  | 0.296342 | 0.38327  | 0.265857 | 0.149949 | 0.120049 | -0.23748 |
| 0.180111 | -0.29224 | 0.171306 | -0.16183 | -0.19348 | 0.39512  | 0.019253 | 0.291334 | 0.213541 |
| 0.084118 | 0.206775 | 0.30799  | 0.073183 | 0.113704 | 0.361905 | -0.00929 | -0.08661 | -0.23414 |
| 0.435019 | 0.392367 | 0.438089 | 0.450423 | 0.429615 | 0.315566 | 0.06256  | -0.02536 | -0.17235 |
| 0.196851 | 0.098661 | 0.410862 | 0.256332 | 0.228742 | 0.342367 | 0.005319 | -0.03643 | -0.32854 |
| 0.062115 | 0.199425 | 0.144133 | 0.038936 | 0.138255 | 0.184787 | 0.299466 | 0.082154 | -0.0344  |
| 0.351035 | 0.260589 | 0.523346 | 0.428956 | 0.34888  | 0.306357 | 0.198091 | -0.03182 | -0.2266  |
| 0.288166 | 0.24787  | 0.616372 | 0.505614 | 0.297529 | 0.437392 | 0.320599 | -0.27564 | -0.3339  |
| 0.048356 | 0.455776 | 0.062808 | 0.048294 | 0.421667 | 0.476784 | 0.492529 | -0.2934  | -0.17141 |
| 0.38546  | 0.321262 | 0.475753 | 0.374227 | 0.387945 | 0.255713 | 0.000417 | 0.040693 | -0.28936 |
| 0.125838 | -0.00848 | 0.215645 | 0.212018 | 0.012891 | 0.0902   | -0.14129 | -0.03702 | -0.16694 |
| 0.172055 | 0.254477 | 0.209999 | 0.161203 | 0.304527 | 0.139157 | -0.02812 | -0.02548 | -0.05795 |
| -0.24224 | 0.413483 | -0.07805 | 0.009296 | 0.337115 | 0.403926 | 0.079495 | -0.03693 | -0.03424 |
| 0.046836 | 0.212286 | -0.19357 | -0.09581 | 0.264956 | 0.279246 | 0.465787 | -0.2981  | -0.27054 |
| -0.05114 | 0.232372 | -0.01589 | 0.056464 | 0.260623 | 0.194861 | 0.309429 | -0.11628 | -0.25562 |
| -0.06509 | 0.25422  | -0.15058 | 0.253187 | 0.2818   | -0.1117  | 0.342929 | -0.16413 | -0.28416 |
| -0.08599 | -0.10522 | -0.22246 | -0.15421 | 0.029505 | 0.120282 | 0.322235 | -0.0059  | -0.17912 |
| -0.17926 | 0.194229 | -0.3963  | -0.23659 | -0.09012 | 0.005537 | 0.442515 | 0.223317 | -0.076   |
| 0.065781 | 0.271362 | 0.090831 | 0.007501 | 0.405741 | 0.297896 | 0.322275 | 0.017044 | -0.05478 |
| -0.26815 | 0.447064 | 0.136183 | 0.130345 | 0.349355 | 0.403662 | 0.506335 | -0.09371 | -0.23323 |
| -0.04222 | 0.341839 | 0.018617 | 0.070587 | 0.313712 | 0.305296 | 0.409506 | -0.1574  | -0.22286 |
| 0.042095 | 0.296398 | 0.144892 | 0.233935 | 0.387644 | 0.227407 | 0.361244 | 0.034362 | -0.16215 |
| -0.02894 | 0.400376 | 0.190542 | 0.146478 | 0.288463 | 0.421631 | 0.492816 | 0.055281 | -0.29921 |
| 0.080054 | 0.304111 | 0.160298 | 0.063886 | 0.309593 | 0.133074 | 0.26957  | 0.027414 | 0.042265 |
| -0.02231 | 0.361173 | 0.2523   | 0.220665 | 0.096679 | 0.262213 | 0.219859 | -0.16705 | -0.12551 |
| -0.00874 | 0.340606 | 0.301998 | 0.216001 | 0.236988 | 0.347964 | 0.415194 | -0.0785  | -0.25097 |
| -0.12265 | 0.540917 | -0.22448 | -0.08921 | 0.436321 | 0.475087 | 0.483876 | -0.01911 | -0.00238 |
| 0.320436 | 0.29958  | 0.119965 | 0.194971 | 0.384026 | 0.188898 | 0.173235 | -0.1413  | -0.18421 |
| 0.137785 | 0.272329 | 0.19276  | 0.104748 | 0.325097 | 0.139156 | 0.347249 | 0.038516 | -0.14185 |
| 0.274813 | 0.25863  | 0.095866 | 0.192748 | 0.347712 | 0.04143  | -0.00021 | -0.03803 | 0.07001  |
| 0.176446 | 0.103078 | 0.059002 | 0.203602 | 0.204836 | 0.231034 | 0.275416 | 0.090322 | 0.243931 |
| 0.194208 | 0.257149 | 0.393733 | 0.319943 | 0.252503 | 0.314894 | 0.196156 | -0.07461 | -0.19632 |
| 0.081942 | 0.187013 | 0.039386 | -0.01851 | 0.20937  | -0.05829 | 0.084916 | 0.10353  | -0.00746 |
| 0.198022 | 0.148464 | 0.034207 | -0.12714 | 0.246022 | 0.214872 | 0.123896 | -0.0449  | 0.057858 |
| -0.08169 | 0.163082 | 0.180302 | 0.193093 | 0.337778 | 0.115614 | 0.048578 | -0.12461 | -0.19853 |

|          |          |          |          |          |          |          |          |          |
|----------|----------|----------|----------|----------|----------|----------|----------|----------|
| 0.03946  | 0.117136 | 0.231082 | 0.203555 | 0.286258 | 0.298416 | 0.06264  | -0.06798 | -0.01854 |
| 0.103119 | -0.02921 | -0.10747 | -0.07889 | 0.14539  | 0.108013 | 0.126602 | 0.043927 | 0.013898 |
| 0.153092 | 0.307435 | 0.200981 | 0.049382 | 0.453055 | 0.151757 | -0.08383 | -0.15826 | 0.011495 |
| -0.13682 | 0.439128 | -0.27158 | -0.16137 | 0.45503  | 0.392406 | 0.46134  | -0.34958 | -0.25588 |
| 0.169985 | -0.06551 | -0.49585 | -0.48457 | 0.286778 | 0.057653 | -0.57613 | 0.286265 | 0.715531 |
| 0.1609   | 0.273208 | 0.236257 | -0.04174 | 0.307138 | 0.242787 | 0.107161 | 0.188269 | 0.068651 |
| 0.147515 | 0.195289 | 0.201153 | 0.026818 | 0.423471 | 0.317651 | -0.02857 | -0.02874 | -0.01248 |
| -0.25065 | 0.003158 | -0.30542 | -0.22719 | -0.22588 | -0.18678 | 0.114915 | -0.21436 | -0.04699 |
| -0.48575 | -0.21653 | -0.54243 | -0.40223 | -0.45337 | -0.32846 | 0.03522  | -0.24101 | 0.086881 |
| 0.102174 | 0.165668 | -0.16799 | -0.00915 | 0.098228 | 0.160929 | 0.218305 | -0.31275 | -0.27175 |
| -0.24221 | -0.15848 | -0.39492 | -0.29016 | -0.34588 | -0.32623 | 0.051262 | -0.0469  | 0.057489 |
| -0.04152 | 0.484609 | -0.00116 | 0.141898 | 0.434098 | 0.211293 | 0.410848 | -0.32677 | 0.017679 |
| 0.040096 | 0.161474 | -0.02978 | -0.03268 | 0.003781 | 0.123402 | -0.091   | -0.11581 | -0.06962 |
| 0.15229  | 0.194131 | -0.01255 | 0.040507 | 0.21317  | 0.037081 | 0.166614 | -0.08098 | -0.40753 |
| -0.08601 | 0.458881 | 0.002336 | 0.118687 | 0.34876  | 0.413428 | 0.581979 | -0.27916 | -0.3617  |
| 0.141011 | 0.171111 | 0.293511 | 0.267771 | 0.201571 | 0.268751 | 0.160128 | 0.073733 | -0.14758 |
| 0.170062 | 0.237855 | 0.344364 | 0.211933 | 0.293306 | 0.098327 | 0.161263 | 0.202512 | -0.1582  |
| 0.201407 | 0.27505  | 0.362663 | 0.233361 | 0.417324 | 0.010647 | 0.195043 | 0.172974 | 0.002717 |
| 0.200947 | 0.122016 | 0.333146 | 0.272721 | 0.194186 | 0.136303 | 0.058636 | 0.245099 | -0.18935 |
| 0.39087  | 0.236493 | 0.386309 | 0.130979 | 0.263962 | 0.129378 | 0.318887 | 0.160083 | -0.00898 |
| 0.157702 | 0.178106 | 0.398551 | 0.339815 | 0.375283 | 0.114359 | 0.087401 | 0.124273 | -0.10584 |
| 0.250802 | 0.139469 | 0.29251  | 0.281872 | 0.223303 | 0.111025 | 0.170677 | 0.231721 | -0.10709 |
| 0.440901 | 0.204911 | 0.380746 | 0.277531 | 0.307466 | 0.192029 | 0.138809 | 0.278978 | 0.019285 |
| 0.080852 | -0.00504 | 0.290942 | 0.186442 | -0.13963 | 0.433292 | 0.134947 | 0.013159 | -0.10584 |
| 0.247807 | 0.150604 | 0.377252 | 0.357526 | 0.253467 | 0.275639 | 0.012263 | 0.040214 | -0.04857 |
| 0.064499 | -0.0425  | 0.13036  | 0.151059 | 0.056012 | -0.0389  | 0.032042 | 0.29214  | -0.02502 |
| 0.21531  | 0.162289 | 0.272542 | 0.21101  | 0.271159 | 0.094066 | 0.238591 | 0.288009 | -0.13876 |
| 0.281671 | 0.263953 | 0.216939 | -0.00216 | 0.230781 | 0.251348 | 0.319838 | 0.10502  | -0.05855 |
| 0.053341 | 0.041631 | 0.290591 | 0.281738 | 0.146557 | 0.013315 | 0.183761 | 0.161839 | -0.19424 |
| 0.13511  | 0.195513 | 0.227589 | 0.110546 | 0.183647 | 0.053337 | 0.205909 | 0.271467 | 0.065779 |
| -0.20808 | 0.537697 | -0.01639 | -0.06084 | 0.528917 | 0.35078  | 0.559236 | -0.16573 | -0.0878  |
| -0.1339  | 0.427954 | -0.23714 | -0.08944 | 0.359249 | 0.408143 | 0.516273 | -0.21227 | -0.15812 |
| -0.20485 | 0.432572 | -0.33703 | -0.21134 | 0.457304 | 0.436057 | 0.568401 | -0.39896 | -0.2458  |
| -0.05558 | 0.506736 | -0.35083 | -0.0818  | 0.356879 | 0.399518 | 0.554308 | -0.47731 | -0.27108 |
| 0.098088 | 0.359795 | 0.298895 | 0.314866 | 0.334075 | 0.427692 | 0.449187 | -0.39843 | -0.33439 |

| TCGA-IB-A | TCGA-IB-A | TCGA-IB-A | TCGA-IB-A | TCGA-IB-A | TCGA-IB-A | TCGA-LB-A | TCGA-Q3-A | TCGA-Q3-A |
|-----------|-----------|-----------|-----------|-----------|-----------|-----------|-----------|-----------|
| 0.066943  | -0.13124  | -0.24758  | 0.129843  | -0.18501  | -0.13803  | -0.02185  | -0.29549  | -0.45717  |
| 0.346661  | 0.085556  | -0.36967  | 0.660151  | 0.608395  | 0.126211  | -0.32879  | -0.4308   | -0.36424  |
| 0.003096  | -0.11101  | -0.31695  | -0.15187  | -0.34319  | -0.0565   | -0.30049  | -0.35483  | -0.04381  |
| -0.19533  | -0.08574  | 0.01848   | 0.561831  | 0.172945  | 0.453304  | -0.31433  | -0.18161  | -0.18659  |
| -0.16224  | 0.249644  | 0.059311  | 0.34871   | -0.04941  | 0.146162  | -0.20523  | -0.20362  | -0.13943  |
| -0.23534  | -0.17947  | -0.08871  | -0.12962  | 0.112023  | -0.14448  | -0.01241  | 0.115811  | 0.180622  |
| -0.47569  | -0.04962  | -0.53376  | -0.36782  | -0.12009  | -0.51197  | -0.00147  | -0.5925   | -0.47534  |
| -0.15537  | -0.25212  | -0.14642  | -0.19112  | 0.01377   | -0.18766  | 0.103842  | -0.12083  | 0.250675  |
| -0.11243  | -0.27318  | -0.18091  | -0.24715  | 0.077778  | -0.188    | 0.361918  | -0.28473  | 0.31681   |
| 0.046093  | -0.01681  | -0.02142  | 0.012696  | 0.347251  | -0.05747  | 0.208918  | 0.181737  | 0.094675  |
| -0.17634  | -0.23877  | -0.0898   | -0.23235  | 0.132422  | -0.28664  | 0.271724  | -0.05366  | 0.358317  |
| 0.02599   | -0.41862  | -0.10522  | -0.25046  | 0.135906  | -0.16901  | 0.383962  | 0.042438  | 0.357558  |
| -0.32802  | -0.18465  | -0.43919  | 0.039508  | 0.227462  | -0.13437  | -0.14945  | -0.43549  | -0.2931   |
| -0.3468   | -0.19012  | -0.31379  | -0.1326   | -0.07087  | -0.3301   | 0.116625  | -0.19804  | 0.151899  |
| -0.03265  | -0.34236  | -0.06516  | 0.27068   | 0.103844  | -0.06172  | 0.228919  | -0.13641  | -0.16799  |
| 0.170091  | -0.21758  | 0.088529  | 0.465104  | -0.05379  | 0.337606  | -0.55792  | -0.07139  | -0.4512   |
| -0.25793  | 0.059889  | -0.24651  | 0.121653  | -0.2594   | -0.10545  | -0.3148   | 0.051991  | -0.04123  |
| -0.09762  | 0.08668   | -0.08645  | 0.110105  | -0.2346   | -0.00959  | 0.309745  | 0.0045    | -0.36972  |
| -0.22249  | 0.111764  | -0.26765  | -0.13701  | 0.082113  | -0.13029  | -0.04158  | -0.21611  | -0.34506  |
| -0.39885  | -0.11821  | -0.42909  | -0.52249  | -0.57722  | -0.59735  | 0.199589  | -0.38717  | -0.11354  |
| -0.02918  | -0.07187  | -0.12761  | -0.17522  | -0.49973  | 0.184545  | -0.09336  | 0.120213  | -0.01048  |
| 0.464604  | -0.08477  | -0.06232  | -0.59802  | -0.64934  | -0.56519  | 0.405534  | 0.202361  | -0.27427  |
| -0.14163  | 0.115922  | -0.12684  | 0.142957  | 0.102292  | -0.02814  | -0.30803  | -0.16346  | -0.18838  |
| 0.071085  | -0.00247  | -0.25914  | 0.5453    | 0.431093  | 0.266153  | -0.3545   | -0.1674   | -0.24717  |
| -0.05797  | 0.122624  | -0.09656  | 0.071567  | -0.14253  | -0.11864  | 0.016587  | 0.211502  | 0.343009  |
| 0.118261  | 0.26405   | 0.487174  | 0.566351  | 0.319485  | 0.418057  | -0.19507  | -0.06268  | -0.04764  |
| -0.33542  | -0.00149  | 0.020959  | -0.08133  | 0.301486  | 0.051655  | 0.040416  | -0.3216   | 0.304806  |
| 0.205419  | 0.232688  | 0.300016  | 0.002073  | 0.233973  | 0.124132  | 0.206437  | 0.125375  | 0.283982  |
| -0.49819  | -0.19998  | -0.43576  | -0.31813  | 0.528978  | -0.37065  | -0.14278  | -0.26364  | -0.07185  |
| 0.258866  | -0.07321  | 0.191605  | 0.147612  | -0.06857  | 0.088506  | -0.25256  | 0.018913  | -0.23234  |
| 0.529042  | -0.24821  | 0.55409   | 0.607228  | 0.572972  | 0.479692  | -0.14365  | 0.506741  | -0.32293  |
| 0.765256  | -0.2287   | 0.711197  | 0.526449  | 0.485057  | 0.189999  | 0.023648  | 0.739036  | -0.27474  |
| 0.135971  | 0.035336  | 0.108393  | 0.2155    | -0.09308  | 0.188397  | -0.3019   | -0.16188  | 0.125167  |
| 0.227894  | 0.011052  | 0.010145  | -0.00236  | -0.07298  | 0.096268  | -0.34149  | -0.22258  | -0.03789  |
| 0.253739  | 0.067691  | 0.227816  | 0.235185  | 0.017821  | 0.244005  | -0.3473   | -0.12598  | 0.039131  |
| -0.23989  | 0.222216  | -0.39019  | -0.00885  | 0.124329  | -0.32247  | -0.02597  | -0.28732  | 0.129126  |
| -0.36094  | -0.46317  | -0.58542  | -0.10209  | 0.064308  | -0.47624  | 0.221807  | -0.39866  | -0.53535  |
| -0.08736  | 0.345908  | -0.23453  | 0.115877  | 0.130441  | -0.42175  | 0.273739  | 0.0255    | 0.122102  |
| -0.31369  | 0.277669  | -0.43052  | -0.14641  | 0.029325  | -0.05045  | -0.09515  | -0.31753  | 0.212776  |
| -0.48277  | 0.15381   | -0.39448  | -0.11324  | 0.081728  | -0.45663  | -0.2606   | -0.29866  | 0.229349  |
| -0.21894  | 0.39862   | -0.23511  | 0.388626  | 0.255723  | 0.30029   | -0.30827  | -0.32087  | -0.03468  |
| -0.39415  | 0.191447  | -0.39849  | -0.29309  | 0.193881  | -0.28635  | 0.05442   | -0.39838  | 0.254019  |
| -0.3273   | -0.4348   | -0.37413  | -0.06112  | 0.313886  | -0.20283  | 0.133231  | -0.37719  | -0.01622  |
| -0.48149  | -0.23953  | -0.41427  | -0.42199  | 0.207976  | -0.60388  | 0.236336  | -0.3091   | -0.3785   |
| -0.032    | 0.073876  | -0.07132  | 0.398605  | 0.59369   | 0.192847  | 0.437008  | 0.063413  | -0.33025  |
| -0.24602  | 0.180126  | -0.34144  | -0.16028  | 0.140527  | -0.25023  | 0.176712  | -0.23342  | 0.101965  |
| -0.34646  | 0.018221  | -0.35051  | 0.079998  | -0.20063  | -0.35288  | 0.221799  | 0.21379   | 0.165157  |
| -0.07484  | 0.096965  | -0.12588  | -0.02498  | -0.20366  | -0.146    | -0.06647  | -0.08072  | -0.00911  |
| -0.20073  | 0.067362  | -0.30284  | -0.20048  | -0.46303  | -0.26895  | 0.151855  | -0.02762  | 0.018919  |

|          |          |          |          |          |          |          |          |          |
|----------|----------|----------|----------|----------|----------|----------|----------|----------|
| -0.36574 | -0.02458 | -0.3856  | -0.2656  | -0.04514 | -0.32111 | 0.334145 | -0.30567 | 0.051399 |
| -0.41596 | 0.040884 | -0.32611 | -0.22607 | 0.477339 | -0.26481 | -0.14273 | -0.17501 | -0.14901 |
| -0.18708 | 0.056094 | -0.34597 | -0.04337 | 0.246689 | -0.23534 | -0.14944 | -0.1084  | 0.068537 |
| -0.45173 | -0.20976 | -0.55008 | -0.30247 | 0.477978 | -0.39394 | 0.366029 | -0.46105 | -0.2198  |
| 0.046596 | -0.2205  | -0.12509 | -0.29617 | 0.169204 | -0.09538 | 0.18983  | -0.27769 | -0.32116 |
| -0.43159 | -0.00547 | -0.44455 | -0.20497 | 0.005624 | -0.24114 | 0.120538 | -0.40634 | -0.05179 |
| -0.43689 | -0.21422 | -0.34914 | -0.3451  | -0.27429 | -0.33324 | 0.407876 | -0.14249 | 0.289218 |
| -0.25123 | 0.081304 | -0.13193 | -0.14499 | 0.109576 | -0.11952 | 0.313745 | 0.113575 | 0.219714 |
| -0.40892 | 0.042035 | -0.17808 | -0.04995 | 0.087692 | -0.26193 | 0.25111  | 0.05709  | 0.170561 |
| 0.145456 | -0.16022 | 0.048799 | 0.047467 | 0.258287 | -0.05044 | -0.08713 | 0.192641 | -0.08605 |
| -0.46349 | -0.36174 | -0.39863 | -0.14623 | 0.409078 | -0.14549 | 0.34351  | -0.18039 | 0.064088 |
| -0.36331 | 0.473297 | -0.14564 | -0.13524 | 0.517023 | -0.01778 | 0.064349 | -0.27332 | 0.006641 |
| -0.37593 | 0.044858 | -0.34287 | -0.30647 | 0.136437 | -0.42532 | 0.108886 | -0.30845 | 0.074479 |
| -0.32488 | 0.147017 | -0.28452 | -0.01641 | 0.331684 | -0.36553 | 0.514651 | -0.26196 | 0.016422 |
| -0.10927 | 0.406441 | -0.21535 | -0.02929 | 0.026184 | 0.046751 | -0.08484 | -0.24982 | 0.061989 |
| -0.38828 | 0.046589 | -0.29616 | 0.321191 | 0.213027 | 0.247434 | -0.20873 | -0.34599 | -0.17957 |
| 0.340769 | 0.63429  | 0.43581  | 0.555042 | 0.30969  | 0.692759 | -0.43961 | 0.448102 | 0.043395 |
| 0.068657 | 0.08488  | 0.055772 | 0.439407 | 0.2302   | 0.391532 | -0.18285 | -0.02194 | 0.105624 |
| 0.124532 | -0.25145 | 0.130418 | -0.08712 | 0.146152 | -0.10689 | -0.06561 | -0.07298 | -0.00701 |
| -0.45601 | 0.045584 | -0.43651 | -0.23396 | 0.081029 | -0.1646  | 0.018401 | -0.0511  | -0.14153 |
| -0.27964 | 0.369351 | -0.34632 | 0.125473 | -0.262   | -0.17754 | 0.211912 | -0.13134 | -0.08567 |
| -0.49731 | -0.43738 | -0.51624 | -0.40996 | 0.34314  | -0.16743 | 0.100674 | -0.33675 | -0.22496 |
| -0.38582 | -0.08228 | -0.48835 | -0.2622  | 0.426388 | -0.26384 | 0.090376 | -0.30666 | -0.04392 |
| -0.28172 | -0.02503 | -0.29731 | -0.22942 | -0.49927 | -0.25508 | 0.093538 | -0.20544 | 0.035083 |
| -0.19779 | 0.441195 | -0.38872 | 0.087801 | -0.32134 | -0.2783  | 0.548906 | 0.187022 | -0.27159 |
| -0.21242 | 0.198305 | -0.29588 | -0.20842 | 0.048109 | -0.279   | 0.09997  | -0.13573 | 0.288905 |
| -0.3978  | 0.38166  | -0.46094 | 0.060317 | -0.13334 | -0.28924 | 0.136873 | -0.20119 | 0.068781 |
| -0.57321 | -0.12937 | -0.34822 | -0.40518 | -0.20976 | -0.601   | 0.289362 | -0.33473 | -0.35953 |
| -0.41011 | -0.38943 | -0.37638 | -0.32737 | 0.065208 | -0.19159 | 0.230064 | -0.32582 | 0.190992 |
| -0.28277 | -0.10783 | -0.28884 | -0.08015 | -0.37207 | -0.04234 | -0.22484 | -0.09741 | 0.193582 |
| -0.19796 | 0.228599 | -0.29682 | -0.2162  | 0.294021 | -0.23225 | 0.410494 | -0.15266 | 0.297032 |
| -0.2849  | 0.123118 | -0.28609 | -0.27135 | 0.293436 | -0.21485 | 0.306098 | -0.19377 | 0.290642 |
| -0.43422 | 0.267109 | -0.35334 | 0.043077 | -0.21027 | -0.30631 | 0.08617  | -0.25627 | 0.246534 |
| -0.58066 | -0.08533 | -0.50294 | -0.04408 | -0.27973 | -0.50811 | -0.46579 | -0.25607 | 0.05376  |
| 0.243593 | -0.08595 | 0.137679 | 0.090836 | 0.178686 | 0.084997 | -0.20569 | -0.1071  | -0.02796 |
| 0.635018 | -0.17221 | 0.660011 | -0.21133 | -0.20313 | 0.322964 | -0.20231 | 0.784132 | 0.518303 |
| 0.186654 | -0.21553 | 0.137413 | -0.08583 | -0.41007 | -0.05492 | -0.01039 | 0.323085 | 0.046622 |
| -0.0987  | -0.15777 | 0.130745 | -0.33165 | -0.45567 | 0.190115 | 0.112586 | 0.307083 | -0.08031 |
| 0.46506  | -0.0177  | -0.26915 | -0.23839 | -0.59453 | -0.62097 | 0.379845 | 0.329221 | -0.03361 |
| 0.406901 | -0.26678 | 0.392395 | -0.20266 | -0.37866 | -0.16431 | 0.181364 | 0.437093 | 0.11606  |
| 0.057215 | 0.085746 | -0.43357 | 0.173769 | -0.51251 | -0.48245 | 0.047983 | 0.050757 | -0.13388 |
| -0.23933 | -0.11063 | -0.43406 | -0.05944 | -0.26334 | -0.08313 | -0.20877 | -0.18315 | -0.12861 |
| -0.31988 | 0.007712 | -0.16861 | 0.057538 | 0.023143 | -0.07054 | -0.1056  | 0.084226 | 0.078749 |
| 0.280086 | -0.33228 | -0.17333 | -0.33202 | -0.54748 | -0.63474 | 0.289629 | 0.065171 | 0.347711 |
| -0.00388 | 0.161683 | -0.32351 | -0.33347 | -0.51143 | -0.30725 | -0.03324 | -0.01145 | -0.0192  |
| 0.426658 | 0.045871 | -0.39807 | -0.39454 | -0.53432 | -0.5533  | 0.313143 | 0.111745 | -0.01227 |
| 0.272136 | 0.131137 | -0.20871 | -0.22166 | -0.65589 | -0.4838  | 0.410829 | 0.211272 | 0.271738 |
| 0.197441 | -0.16083 | 0.24783  | 0.18604  | 0.171891 | 0.239376 | -0.06948 | 0.074903 | -0.0981  |
| 0.138969 | -0.22873 | 0.104143 | -0.10792 | 0.112662 | 0.051138 | -0.08469 | -0.00899 | -0.3656  |
| 0.229389 | -0.18209 | 0.26359  | 0.138824 | 0.103658 | 0.216    | -0.17628 | 0.118298 | -0.071   |

|          |          |          |          |          |          |          |          |          |
|----------|----------|----------|----------|----------|----------|----------|----------|----------|
| 0.282309 | -0.18367 | 0.428768 | 0.408261 | 0.362051 | 0.189484 | -0.12088 | 0.401523 | -0.04101 |
| 0.303859 | -0.25931 | 0.402981 | 0.400622 | 0.318365 | 0.298864 | -0.1237  | 0.319389 | -0.2417  |
| 0.275896 | -0.2877  | 0.206907 | -0.1221  | 0.065755 | -0.03028 | -0.08922 | 0.141141 | -0.01176 |
| 0.183789 | 0.079248 | 0.294571 | 0.289503 | 0.250014 | 0.202451 | -0.1476  | 0.236747 | -0.04103 |
| 0.279257 | -0.06545 | -0.17148 | -0.28913 | -0.483   | -0.36764 | 0.19907  | 0.089615 | -0.22916 |
| 0.237908 | -0.03808 | -0.13791 | -0.20248 | -0.29722 | -0.19188 | 0.011732 | -0.18284 | -0.22299 |
| 0.117599 | 0.110753 | -0.04846 | 0.051276 | -0.31592 | -0.10259 | -0.16595 | 0.206101 | 0.217963 |
| 0.239022 | -0.05102 | -0.20001 | -0.29234 | -0.35048 | 0.021683 | 0.096563 | -0.01256 | -0.21305 |
| -0.20112 | -0.11477 | -0.28833 | 0.011645 | 0.010251 | 0.251037 | -0.22345 | -0.16893 | -0.15255 |
| 0.027323 | -0.21955 | 0.06225  | 0.031148 | 0.086161 | -0.03838 | -0.12603 | -0.14994 | -0.13628 |
| -0.41476 | -0.04045 | -0.5363  | -0.31138 | -0.25583 | -0.40778 | 0.308165 | -0.34714 | 0.104082 |
| 0.121766 | -0.04179 | 0.138045 | 0.188993 | 0.13468  | 0.246144 | 0.051804 | 0.162785 | -0.3726  |
| 0.193887 | -0.28584 | 0.286171 | 0.262651 | 0.037007 | -0.02706 | -0.11301 | 0.1044   | -0.17605 |
| 0.309645 | -0.1102  | 0.261938 | 0.274624 | 0.317    | 0.307745 | -0.17352 | -0.01286 | 0.042482 |
| 0.187738 | 0.036911 | 0.083153 | -0.10931 | -0.05854 | 0.128644 | 0.036325 | -0.06454 | -0.19928 |
| 0.251876 | -0.00829 | 0.126645 | 0.046443 | 0.486619 | 0.116949 | -0.34322 | -0.23039 | -0.25818 |
| 0.278428 | 0.062718 | 0.085258 | -0.01037 | 0.260181 | -0.1784  | -0.06906 | -0.23879 | -0.04494 |
| 0.16587  | 0.308011 | 0.197083 | 0.015953 | 0.06845  | 0.126929 | 0.101741 | -0.0416  | 0.005847 |
| 0.155688 | -0.08382 | 0.210687 | 0.050211 | 0.237763 | 0.31183  | -0.20034 | -0.11178 | -0.37805 |
| 0.155832 | 0.175508 | -0.01121 | -0.07092 | 0.055339 | 0.036452 | -0.00073 | -0.21104 | -0.27805 |
| 0.281029 | -0.32049 | 0.198672 | 0.169947 | 0.128953 | 0.126551 | -0.02933 | 0.057463 | -0.22962 |
| 0.319093 | 0.171009 | 0.157749 | 0.236484 | 0.124341 | 0.235222 | -0.34815 | -0.17721 | -0.34579 |
| 0.365003 | 0.336562 | 0.183106 | 0.433172 | 0.213774 | 0.228128 | -0.4367  | -0.17992 | -0.36289 |
| 0.509278 | -0.10766 | 0.325937 | 0.414881 | 0.517024 | 0.265179 | -0.23232 | 0.286037 | -0.38514 |
| 0.067582 | 0.037849 | -0.11136 | -0.19592 | 0.106721 | 0.045631 | -0.34265 | -0.28566 | -0.26924 |
| -0.13883 | -0.16407 | -0.29858 | -0.15695 | 0.140679 | -0.16031 | -0.10719 | -0.41005 | 0.030167 |
| 0.165381 | -0.00053 | 0.038666 | 0.143354 | 0.222178 | 0.230355 | -0.19039 | -0.20703 | -0.20817 |
| -0.08579 | 0.470371 | 0.193423 | 0.382145 | 0.506118 | 0.382713 | -0.40428 | -0.03256 | -0.24842 |
| 0.492223 | -0.31929 | 0.438889 | 0.551835 | 0.495558 | 0.126903 | 0.132462 | 0.372387 | -0.30633 |
| 0.292895 | -0.35216 | 0.314597 | 0.403773 | 0.257106 | 0.298649 | -0.29918 | 0.341787 | -0.29655 |
| 0.104304 | -0.21922 | 0.32179  | 0.291638 | 0.064683 | -0.00195 | 0.109179 | 0.249115 | -0.06801 |
| 0.371302 | 0.066271 | 0.303273 | 0.116895 | 0.092976 | -0.09318 | -0.19423 | 0.389792 | -0.18409 |
| 0.275478 | 0.015171 | 0.434555 | 0.287934 | -0.1298  | 0.09527  | 0.026622 | 0.510026 | -0.10819 |
| 0.354157 | -0.18731 | 0.447268 | 0.312138 | 0.225691 | 0.184393 | -0.20062 | 0.411159 | -0.1522  |
| 0.503725 | -0.23647 | 0.52401  | 0.524514 | 0.428939 | 0.36426  | -0.29437 | 0.501131 | -0.20543 |
| 0.467225 | -0.27868 | 0.376494 | 0.453853 | 0.340412 | 0.174821 | -0.2225  | 0.376411 | -0.23441 |
| 0.519395 | -0.35093 | 0.393128 | 0.226608 | 0.2446   | 0.208655 | -0.22687 | 0.345984 | -0.33655 |
| 0.578344 | -0.3016  | 0.468696 | 0.431155 | 0.224436 | 0.314107 | -0.2372  | 0.452593 | -0.28846 |
| 0.377907 | -0.3458  | 0.256287 | 0.173346 | 0.083679 | 0.078626 | -0.06446 | 0.25621  | -0.20223 |
| 0.364214 | -0.24014 | 0.261825 | 0.264473 | 0.166701 | 0.09066  | -0.13085 | 0.159269 | -0.17631 |
| 0.380739 | -0.09478 | 0.181601 | 0.274356 | 0.372959 | 0.102164 | -0.25031 | 0.116334 | -0.16921 |
| 0.631251 | -0.34092 | 0.72505  | 0.616111 | 0.613424 | 0.393188 | -0.12268 | 0.699267 | -0.21601 |
| 0.417601 | -0.2719  | 0.244701 | -0.01497 | 0.084128 | 0.116742 | -0.10701 | 0.095812 | -0.23048 |
| 0.363301 | -0.24569 | 0.230089 | 0.260247 | 0.181667 | 0.272525 | -0.2484  | 0.117201 | -0.28314 |
| 0.175707 | -0.18906 | -0.02574 | -0.02143 | 0.154516 | 0.051482 | -0.10633 | -0.14739 | -0.19508 |
| 0.227489 | 0.093395 | 0.281497 | 0.282392 | 0.185956 | 0.212153 | 0.154653 | 0.206004 | 0.261436 |
| 0.31007  | -0.00914 | 0.152301 | 0.178191 | 0.119301 | 0.222647 | -0.20386 | -0.07141 | -0.24273 |
| 0.069308 | -0.0372  | 0.082631 | 0.081489 | 0.131175 | 0.034757 | -0.04319 | 0.044029 | -0.13194 |
| 0.235484 | -0.29452 | 0.173309 | 0.016534 | 0.174361 | 0.067742 | 0.025888 | -0.12465 | -0.00654 |
| 0.248197 | 0.10745  | -0.15817 | 0.135848 | -0.03844 | -0.04932 | -0.09684 | -0.15464 | -0.34289 |

|          |          |          |          |          |          |          |          |          |
|----------|----------|----------|----------|----------|----------|----------|----------|----------|
| 0.252251 | 0.134566 | 0.142816 | 0.175113 | 0.243428 | 0.250453 | 0.114957 | -0.03252 | -0.09435 |
| -0.18861 | -0.1327  | 0.060694 | 0.162996 | 0.20773  | -0.0181  | -0.02169 | -0.17194 | -0.06761 |
| -0.0389  | 0.148795 | -0.04862 | 0.209082 | 0.181834 | 0.006432 | -0.23604 | -0.11289 | -0.28598 |
| 0.561932 | -0.29733 | 0.541777 | 0.451015 | 0.459229 | 0.117603 | 0.064584 | 0.557792 | -0.19692 |
| -0.49045 | 0.418832 | -0.50491 | -0.56152 | 0.637044 | -0.41514 | -0.21853 | -0.56355 | -0.0705  |
| -0.02632 | 0.071993 | -0.05623 | 0.21008  | 0.327461 | -0.00346 | -0.06525 | -0.06462 | -0.31153 |
| 0.078729 | 0.042037 | -0.10644 | -0.0516  | 0.288009 | 0.111919 | -0.20607 | -0.3647  | 0.103246 |
| -0.16122 | -0.18443 | -0.25436 | -0.00489 | -0.20421 | -0.29791 | 0.19998  | 0.012713 | 0.039951 |
| -0.28426 | -0.04117 | -0.27881 | -0.03677 | -0.15283 | -0.29748 | 0.25084  | 0.187696 | 0.158147 |
| -0.01324 | -0.28546 | -0.0127  | 0.06266  | -0.17685 | -0.0708  | -0.14327 | -0.0543  | 0.080318 |
| -0.20974 | -0.14937 | -0.2738  | -0.23858 | -0.18056 | -0.35486 | 0.191817 | -0.03674 | 0.1272   |
| 0.238389 | 0.236323 | 0.377962 | 0.432109 | 0.410687 | 0.415671 | -0.33669 | 0.310933 | -0.2614  |
| -0.16124 | -0.00714 | -0.282   | 0.308152 | 0.212061 | -0.17003 | 0.012427 | -0.28613 | -0.26788 |
| -0.06547 | -0.35852 | -0.0417  | 0.186519 | 0.022026 | 0.041588 | 0.039578 | -0.10424 | -0.2201  |
| 0.562544 | -0.32615 | 0.525593 | 0.602696 | 0.485075 | 0.444983 | -0.21901 | 0.476855 | -0.20595 |
| 0.307182 | -0.01168 | 0.123381 | 0.135412 | 0.111875 | 0.057194 | -0.06942 | -0.041   | -0.27725 |
| 0.328098 | -0.14294 | 0.12239  | 0.14272  | 0.044532 | 0.214982 | -0.27608 | 0.080032 | -0.40725 |
| 0.326789 | -0.15463 | 0.027352 | 0.136683 | 0.254944 | 0.112221 | -0.26768 | -0.06083 | -0.39829 |
| 0.190553 | 0.064429 | 0.023183 | 0.232639 | 0.081788 | 0.023113 | -0.22396 | -0.18045 | -0.4582  |
| 0.329683 | -0.18789 | 0.200758 | 0.090227 | 0.120892 | 0.170663 | -0.24846 | 0.068737 | -0.44809 |
| 0.36064  | -0.06904 | 0.170135 | 0.057888 | 0.137692 | 0.182841 | -0.15625 | -0.03699 | -0.41706 |
| 0.302496 | -0.23157 | 0.160699 | 0.089699 | 0.15037  | 0.122078 | -0.15717 | 0.026294 | -0.35105 |
| 0.325135 | -0.33346 | 0.025176 | -0.12678 | -0.26092 | 0.013605 | -0.34503 | -0.07656 | -0.41349 |
| 0.287115 | 0.254431 | 0.171077 | 0.052171 | 0.159769 | 0.152318 | 0.251437 | 0.079205 | -0.08585 |
| 0.245195 | 0.119325 | 0.104136 | 0.261177 | 0.204374 | 0.269228 | -0.14336 | -0.18909 | -0.38004 |
| 0.206994 | -0.06487 | 0.210894 | 0.070929 | 0.098747 | 0.109958 | -0.30812 | -0.00674 | -0.3744  |
| 0.308248 | -0.26017 | 0.270962 | 0.151712 | 0.117741 | 0.106934 | -0.24278 | 0.001444 | -0.26155 |
| 0.468997 | -0.22131 | 0.380377 | 0.420181 | 0.311538 | 0.309656 | -0.10671 | 0.372594 | -0.35169 |
| 0.302302 | 0.0358   | 0.124385 | 0.186752 | -0.02771 | -0.04139 | -0.29772 | -0.07464 | -0.35339 |
| 0.325511 | -0.09343 | 0.236062 | 0.176355 | 0.298706 | 0.124996 | -0.20865 | 0.119184 | -0.43685 |
| 0.62325  | -0.42859 | 0.77803  | 0.603375 | 0.529671 | 0.503959 | 0.269346 | 0.722367 | -0.12297 |
| 0.672595 | -0.34066 | 0.644618 | 0.632368 | 0.546145 | 0.329359 | 0.07169  | 0.658689 | -0.14699 |
| 0.697996 | -0.38584 | 0.720267 | 0.611792 | 0.596427 | 0.337389 | 0.00849  | 0.716606 | -0.13657 |
| 0.658298 | -0.38148 | 0.642943 | 0.726566 | 0.617445 | 0.366397 | 0.016626 | 0.662777 | -0.31976 |
| 0.439687 | -0.10952 | 0.39514  | 0.447331 | 0.229487 | 0.267821 | -0.19959 | 0.358937 | -0.33807 |



| TCGA-RB-A | TCGA-S4-A | TCGA-S4-A | TCGA-S4-A | TCGA-US-A | TCGA-US-A | TCGA-US-A | TCGA-US-A | TCGA-XD-A |
|-----------|-----------|-----------|-----------|-----------|-----------|-----------|-----------|-----------|
| -0.39014  | -0.27594  | -0.14796  | -0.35513  | 0.164463  | -0.1836   | 0.033333  | -0.09473  | -0.18668  |
| 0.002749  | -0.38327  | -0.34125  | -0.12151  | -0.04837  | -0.2784   | 0.197258  | 0.24175   | 0.023609  |
| -0.03683  | 0.362686  | 0.218789  | 0.349651  | 0.12626   | -0.1346   | 0.229078  | -0.37285  | -0.15298  |
| 0.293617  | 0.059862  | -0.31467  | -0.35139  | 0.147985  | -0.40812  | 0.383578  | 0.272079  | 0.446483  |
| -0.02883  | -0.34045  | -0.25312  | -0.05319  | -0.19907  | -0.05682  | 0.077501  | 0.207213  | 0.225772  |
| 0.031502  | 0.07666   | 0.120888  | -0.07965  | 0.078379  | 0.202394  | 0.066485  | 0.209559  | -0.14655  |
| -0.16121  | 0.042734  | 0.070628  | -0.20414  | 0.389327  | 0.321273  | 0.165642  | -0.18842  | -0.27188  |
| -0.01295  | 0.227378  | -0.1409   | -0.03399  | -0.09924  | 0.147187  | 0.220699  | -0.04603  | -0.0667   |
| -0.01457  | 0.194106  | -0.32128  | 0.242962  | 0.018993  | 0.192558  | 0.044804  | -0.21057  | -0.08084  |
| 0.21046   | 0.16175   | -0.00024  | 0.213609  | -0.10866  | 0.325673  | 0.151961  | 0.301032  | 0.132998  |
| 0.319563  | 0.479358  | -0.02948  | 0.336296  | 0.398501  | 0.487263  | 0.404419  | -0.14866  | -0.25882  |
| 0.157138  | 0.301862  | 0.030988  | 0.303007  | 0.009714  | 0.338121  | 0.188038  | -0.17936  | -0.14149  |
| -0.24807  | 0.115055  | -0.40285  | -0.19934  | -0.40159  | 0.037159  | 0.382757  | -0.10568  | 0.013958  |
| 0.130192  | -0.10267  | -0.06772  | -0.07103  | -0.019    | 0.176906  | 0.239542  | -0.11841  | -0.19848  |
| -0.43094  | -0.12222  | -0.02447  | -0.12398  | -0.42065  | -0.08502  | 0.127323  | 0.041373  | -0.12524  |
| 0.173746  | -0.54585  | -0.30164  | -0.19659  | -0.1498   | -0.48391  | 0.30719   | 0.396108  | 0.204091  |
| 0.17947   | 0.040924  | 0.167712  | -0.00353  | -0.21896  | -0.28037  | 0.294123  | -0.3906   | -0.2499   |
| -0.23158  | 0.047034  | -0.21582  | -0.33441  | -0.18652  | -0.22427  | -0.14589  | -0.04555  | -0.0474   |
| -0.03762  | -0.09689  | -0.49537  | -0.39247  | 0.307938  | 0.163722  | 0.489597  | 0.130398  | -0.24093  |
| 0.259587  | 0.331132  | 0.670411  | -0.0495   | 0.480551  | 0.433015  | -0.3672   | -0.20858  | -0.52984  |
| 0.002221  | -0.04517  | 0.049903  | -0.42037  | 0.264794  | -0.07495  | 0.221767  | -0.19989  | 0.040949  |
| -0.20387  | 0.504643  | 0.293823  | 0.142446  | -0.11069  | -0.01302  | -0.4276   | -0.333    | -0.58244  |
| 0.031336  | -0.14915  | -0.14003  | -0.32124  | -0.13798  | -0.02134  | 0.009625  | 0.080215  | -0.11311  |
| 0.053978  | -0.30656  | -0.30444  | 0.049163  | -0.40861  | -0.14048  | 0.290494  | 0.121404  | -0.04782  |
| -0.00899  | -0.08625  | 0.136811  | 0.139102  | 0.051294  | 0.25674   | -0.04949  | 0.114529  | 0.085655  |
| -0.18127  | -0.4002   | -0.03592  | -0.03863  | -0.26104  | -0.43302  | -0.17208  | 0.3687    | 0.269242  |
| -0.43816  | 0.437665  | -0.09705  | -0.01272  | -0.57885  | -0.22457  | 0.534295  | -0.33922  | 0.144412  |
| -0.10657  | 0.162826  | -0.1759   | 0.096364  | 0.181728  | 0.022662  | 0.231833  | -0.04015  | 0.41958   |
| -0.17334  | -0.0934   | 0.063913  | 0.135408  | -0.14413  | 0.446711  | 0.000612  | 0.032087  | -0.26134  |
| 0.181547  | -0.10262  | 0.025337  | 0.385726  | -0.21982  | -0.29339  | -0.22545  | 0.162821  | -0.01388  |
| 0.002806  | -0.50738  | -0.38151  | -0.14075  | -0.60068  | -0.51397  | -0.57805  | 0.529568  | 0.272063  |
| 0.077936  | -0.09676  | -0.24632  | -0.32447  | -0.34968  | -0.35364  | -0.34666  | 0.655597  | -0.44671  |
| 0.00318   | 0.132483  | -0.10318  | 0.107505  | -0.24537  | -0.31457  | 0.020255  | -0.07405  | 0.254822  |
| -0.04559  | 0.051228  | -0.04416  | 0.13311   | -0.294    | -0.35127  | -0.02392  | -0.18438  | 0.295539  |
| 0.01799   | 0.045637  | -0.09671  | 0.224602  | -0.24128  | -0.30362  | -0.07613  | 0.091058  | 0.302854  |
| 0.215801  | -0.21834  | 0.251521  | 0.070139  | -0.01157  | 0.22645   | -0.01668  | -0.02618  | -0.22753  |
| -0.29004  | -0.3818   | 0.250992  | -0.3119   | -0.12652  | -0.26113  | -0.30929  | -0.07527  | -0.52979  |
| 0.169193  | -0.20193  | 0.201517  | -0.19676  | -0.01949  | 0.463813  | -0.32368  | 0.025995  | -0.35728  |
| 0.079231  | 0.409505  | 0.2876    | -0.00372  | 0.265753  | 0.506683  | -0.17837  | -0.3176   | -0.07081  |
| 0.05359   | 0.001552  | 0.285963  | 0.058677  | 0.034302  | 0.273571  | 0.102575  | -0.22606  | -0.09755  |
| 0.11008   | -0.17239  | -0.049    | 0.161181  | -0.12314  | 0.153246  | 0.199402  | 0.03314   | 0.11906   |
| 0.156777  | 0.409291  | -0.00105  | 0.132133  | 0.376349  | 0.54617   | 0.215813  | -0.19594  | -0.02626  |
| 0.234444  | -0.12966  | -0.15875  | 0.167034  | -0.22307  | 0.310507  | -0.09746  | 0.150765  | 0.062977  |
| 0.087497  | -0.15431  | 0.315722  | 0.019935  | 0.063474  | 0.576787  | -0.31111  | 0.07378   | -0.63321  |
| 0.165247  | -0.07146  | -0.62665  | -0.08066  | 0.159243  | 0.402745  | -0.58304  | 0.138302  | -0.04859  |
| 0.36348   | 0.33308   | -0.04803  | 0.228328  | 0.368369  | 0.537326  | 0.274105  | -0.18135  | -0.07394  |
| 0.211031  | -0.29692  | 0.364055  | -0.02192  | 0.119508  | 0.358651  | -0.01755  | 0.186298  | -0.38277  |
| 0.056954  | -0.11744  | 0.137894  | -0.06407  | 0.138911  | 0.056677  | -0.27355  | 0.032942  | -0.11699  |
| 0.109243  | -0.11014  | 0.295785  | -0.15068  | 0.300286  | 0.252264  | -0.25232  | 0.018341  | -0.38265  |

|          |          |          |          |          |          |          |          |          |
|----------|----------|----------|----------|----------|----------|----------|----------|----------|
| 0.039996 | 0.003422 | 0.044272 | -0.15132 | 0.282214 | 0.261312 | -0.22803 | -0.02597 | -0.12478 |
| -0.21236 | -0.23683 | -0.00421 | 0.026213 | 0.312304 | 0.297376 | -0.26568 | 0.116298 | -0.09178 |
| 0.011029 | -0.168   | 0.240531 | -0.20728 | 0.188154 | -0.05656 | -0.16462 | -0.21026 | -0.06702 |
| -0.17435 | -0.26144 | 0.144343 | -0.36748 | 0.033848 | 0.29503  | -0.24457 | -0.08242 | -0.21657 |
| -0.21303 | -0.02445 | 0.081269 | -0.03444 | -0.05648 | -0.02235 | -0.2183  | -0.04716 | -0.0115  |
| 0.131944 | -0.15439 | 0.146317 | -0.04795 | 0.108183 | 0.241481 | -0.08346 | -0.17544 | -0.11433 |
| 0.296525 | 0.170019 | 0.256018 | -0.00461 | 0.097769 | 0.416023 | -0.22352 | 0.168224 | 0.070754 |
| 0.075707 | -0.03697 | 0.204759 | 0.079507 | 0.0846   | 0.330425 | -0.03935 | 0.167755 | 0.102259 |
| -0.05069 | -0.0545  | 0.220171 | 0.015358 | -0.26853 | 0.241367 | -0.19412 | 0.20342  | -0.12535 |
| 0.171541 | -0.25284 | 0.046834 | 0.122928 | -0.07604 | 0.117233 | -0.29812 | 0.379151 | 0.092566 |
| -0.12005 | -0.22278 | -0.01538 | -0.02362 | 0.145783 | 0.099877 | -0.34223 | -0.01883 | 0.32338  |
| 0.351506 | 0.077378 | -0.05334 | 0.659143 | -0.38953 | 0.137807 | 0.35437  | 0.300459 | 0.567882 |
| 0.166492 | 0.071714 | 0.064688 | 0.03133  | 0.028107 | 0.1537   | -0.09932 | -0.14513 | 0.014858 |
| 0.336129 | -0.19336 | 0.089449 | -0.14798 | -0.05602 | 0.389048 | -0.00746 | 0.309736 | -0.19662 |
| 0.064532 | 0.102354 | -0.00756 | -0.00969 | 0.008352 | 0.184695 | 0.136135 | -0.22387 | 0.001965 |
| 0.103567 | -0.29466 | -0.10524 | -0.27304 | 0.204759 | -0.03373 | -0.177   | -0.16637 | -0.05794 |
| 0.424164 | -0.61069 | -0.03032 | -0.07031 | -0.42116 | -0.53751 | 0.27973  | 0.326091 | 0.647957 |
| 0.354994 | -0.16055 | -0.36784 | 0.118414 | 0.192522 | -0.41234 | 0.289233 | 0.084397 | 0.392985 |
| -0.09979 | 0.193112 | -0.01268 | 0.140839 | -0.23292 | -0.15312 | -0.01294 | -0.11514 | 0.060981 |
| 0.036682 | -0.39197 | 0.205816 | -0.27282 | 0.076403 | 0.167939 | -0.24062 | 0.248829 | -0.1889  |
| -0.39826 | -0.49372 | 0.192068 | -0.42657 | 0.259459 | 0.155734 | -0.33259 | 0.201789 | -0.37598 |
| -0.16946 | -0.28222 | 0.084885 | -0.15225 | 0.255693 | 0.128634 | -0.30666 | -0.0055  | 0.043672 |
| -0.16264 | -0.09567 | 0.316839 | -0.09306 | 0.31772  | 0.427857 | 0.017686 | 0.099751 | 0.04865  |
| -0.24282 | -0.14602 | 0.36676  | -0.06471 | 0.512346 | -0.12644 | -0.41458 | -0.01307 | -0.37425 |
| 0.002929 | -0.13111 | 0.189659 | -0.27452 | 0.243428 | -0.0473  | 0.179619 | 0.100435 | -0.10711 |
| 0.050893 | 0.390461 | -0.08209 | 0.285281 | 0.314947 | 0.543897 | 0.279756 | 0.013323 | -0.07163 |
| 0.244672 | 0.102384 | -0.00981 | 0.068239 | 0.178114 | 0.527299 | 0.094792 | 0.012251 | -0.39115 |
| 0.123299 | -0.09155 | 0.22902  | -0.062   | 0.318578 | 0.452816 | -0.41924 | 0.113106 | -0.43081 |
| -0.10035 | 0.516719 | -0.101   | 0.09887  | 0.258175 | 0.318567 | 0.198191 | -0.30889 | 0.152011 |
| 0.070298 | -0.03629 | -0.27099 | 0.251096 | -0.14412 | 0.289909 | -0.19701 | -0.03232 | 0.024486 |
| 0.330333 | 0.367756 | -0.05283 | 0.160146 | 0.191687 | 0.600842 | 0.239141 | 0.02824  | -0.12935 |
| 0.284258 | 0.370119 | -0.15874 | 0.24223  | 0.158063 | 0.568962 | 0.271566 | -0.0161  | -0.00048 |
| 0.205981 | 0.368001 | 0.266673 | 0.122406 | 0.324613 | 0.539461 | 0.276048 | -0.18414 | -0.35286 |
| -0.11973 | 0.0477   | 0.131595 | 0.08509  | 0.203587 | 0.408521 | -0.05287 | -0.23343 | -0.51179 |
| 0.053249 | -0.02866 | -0.32938 | 0.14012  | 0.03012  | -0.04746 | -0.04105 | 0.050657 | -0.14704 |
| 0.107614 | -0.11961 | 0.477362 | -0.21346 | 0.131453 | 0.49769  | -0.66632 | 0.713945 | 0.199868 |
| -0.37886 | 0.013972 | 0.369734 | -0.33569 | 0.239956 | -0.08186 | -0.37985 | 0.026855 | -0.27486 |
| 0.143868 | -0.22812 | 0.236194 | -0.47482 | 0.307326 | 0.420529 | -0.44111 | 0.083265 | -0.06659 |
| -0.10379 | -0.32179 | 0.364596 | -0.40901 | 0.574729 | 0.194983 | -0.44227 | 0.464438 | -0.73872 |
| -0.04197 | 0.001199 | 0.277868 | 0.089292 | 0.284188 | -0.09775 | -0.40771 | 0.181026 | -0.13676 |
| -0.23125 | -0.6123  | 0.421655 | -0.51363 | 0.347553 | 0.163615 | -0.42015 | 0.298185 | -0.57281 |
| -0.02707 | -0.3762  | 0.139017 | -0.37165 | 0.179174 | -0.43158 | -0.32072 | 0.03739  | -0.04569 |
| 0.002778 | 0.010761 | 0.029312 | 0.126603 | 0.075407 | 0.358365 | -0.08027 | 0.023927 | -0.02813 |
| 0.366046 | 0.185478 | 0.271549 | 0.133249 | 0.438962 | 0.48879  | -0.04426 | 0.310847 | -0.55135 |
| -0.29523 | -0.23602 | 0.086383 | -0.39241 | 0.307471 | -0.15388 | -0.34567 | 0.204035 | -0.41348 |
| -0.25958 | -0.20576 | 0.128039 | -0.55863 | 0.573326 | -0.08707 | -0.26444 | 0.427114 | -0.66002 |
| -0.12851 | 0.097548 | 0.126797 | -0.3201  | 0.58564  | 0.209457 | 0.06164  | 0.017271 | -0.62772 |
| -0.04117 | -0.02132 | -0.23456 | -0.06866 | -0.2431  | -0.28291 | 0.00324  | 0.037964 | 0.22352  |
| -0.30298 | 0.056684 | -0.20672 | -0.03637 | -0.24359 | -0.29068 | -0.15858 | -0.07535 | -0.00829 |
| -0.11844 | -0.02099 | -0.09789 | 0.099299 | -0.05683 | -0.18864 | -0.19061 | 0.126279 | 0.277204 |

|          |          |          |          |          |          |          |          |          |
|----------|----------|----------|----------|----------|----------|----------|----------|----------|
| 0.030015 | -0.13786 | -0.31501 | -0.01493 | -0.36603 | -0.36161 | -0.2612  | 0.407031 | 0.096219 |
| 0.009943 | -0.22597 | -0.27715 | -0.00781 | -0.31859 | -0.25602 | -0.27636 | 0.355499 | 0.047011 |
| -0.15281 | 0.19006  | -0.07132 | 0.236946 | -0.15241 | -0.10586 | 0.027665 | 0.01041  | 0.137101 |
| 0.085636 | -0.15151 | -0.12583 | 0.120628 | -0.19305 | -0.10684 | -0.17557 | 0.239851 | 0.293888 |
| -0.28463 | -0.2829  | 0.349959 | -0.34413 | 0.20418  | -0.30162 | -0.31507 | -0.04032 | -0.41467 |
| -0.31309 | -0.06394 | 0.122545 | -0.09089 | -0.08765 | -0.20648 | -0.12279 | 0.037435 | -0.18351 |
| 0.159561 | -0.0948  | 0.209259 | -0.16558 | -0.11102 | -0.28813 | -0.06916 | 0.03352  | -0.20888 |
| -0.28177 | 0.077694 | -0.11336 | -0.26033 | -0.09642 | -0.24472 | 0.034665 | -0.25595 | -0.18598 |
| 0.124656 | -0.11961 | -0.28544 | -0.20527 | 0.193742 | -0.30701 | -0.08371 | -0.04292 | 0.009141 |
| -0.10401 | -0.04551 | -0.06421 | 0.144177 | -0.31802 | -0.15768 | 0.039514 | -0.13295 | -0.04859 |
| 0.1523   | 0.196504 | -0.211   | 0.006902 | 0.07204  | 0.520955 | 0.012954 | -0.17408 | -0.41521 |
| -0.33887 | -0.11129 | -0.10835 | -0.29231 | -0.31356 | -0.32418 | 0.121486 | -0.06493 | 0.100932 |
| -0.11812 | 0.180765 | -0.16159 | 0.003118 | -0.23191 | -0.20632 | -0.04623 | -0.00288 | -0.10002 |
| 0.057766 | 0.051074 | -0.18423 | 0.315275 | -0.1561  | -0.1387  | 0.050527 | 0.100864 | 0.343281 |
| -0.09756 | -0.05586 | -0.14175 | -0.06913 | -0.20421 | -0.10312 | 0.085662 | -0.04309 | 0.184095 |
| -0.13792 | 0.234964 | -0.13202 | 0.252298 | -0.391   | -0.34849 | 0.273871 | -0.27745 | 0.107758 |
| 0.301376 | -0.15972 | 0.003222 | 0.255241 | -0.29521 | -0.04117 | 0.116929 | -0.28004 | -0.03837 |
| 0.080215 | -0.0379  | 0.007398 | 0.266772 | -0.28688 | -0.12502 | 0.008439 | -0.14237 | 0.339811 |
| 0.028849 | -0.1617  | -0.19827 | 0.085974 | -0.35367 | -0.47261 | 0.200466 | -0.23118 | 0.395702 |
| -0.10447 | -0.02668 | -0.29731 | 0.007478 | -0.43663 | -0.18583 | -0.08023 | -0.1217  | 0.174489 |
| -0.05916 | 0.130475 | -0.11105 | 0.043281 | -0.32585 | -0.09203 | 0.084979 | 0.048696 | 0.12524  |
| 0.078638 | -0.20445 | -0.26755 | 0.234722 | -0.44281 | -0.42425 | 0.031882 | -0.11542 | 0.279787 |
| 0.304473 | -0.35407 | -0.24677 | 0.21388  | -0.49866 | -0.5136  | 0.182986 | -0.03358 | 0.316995 |
| 0.016061 | -0.35705 | -0.37173 | 0.18899  | -0.49824 | -0.48474 | -0.25117 | 0.437002 | 0.202593 |
| -0.1293  | 0.034621 | -0.32518 | 0.033261 | -0.4019  | -0.33152 | 0.217549 | -0.2412  | 0.168254 |
| -0.04741 | 0.081054 | -0.11326 | 0.218015 | -0.23937 | -0.01186 | 0.225369 | -0.28519 | 0.031912 |
| 0.050076 | -0.0252  | -0.21453 | 0.280151 | -0.19053 | -0.26395 | -0.03505 | -0.05483 | 0.299075 |
| 0.119864 | -0.31436 | -0.24311 | 0.238794 | -0.37853 | -0.07496 | -0.09199 | 0.415795 | 0.370834 |
| -0.16402 | -0.1515  | -0.28179 | 0.081915 | -0.37222 | -0.56168 | -0.20689 | 0.384295 | -0.26153 |
| -0.1986  | -0.09916 | -0.29195 | -0.02601 | -0.33486 | -0.3787  | -0.20068 | 0.246913 | -0.13085 |
| 0.029208 | -0.1665  | -0.23659 | -0.26653 | -0.34027 | -0.51828 | -0.37955 | 0.130543 | -0.21016 |
| -0.25672 | 0.074046 | 0.01213  | -0.12291 | -0.02114 | -0.30244 | 0.239875 | 0.052319 | -0.29362 |
| 0.064275 | 0.151295 | -0.08911 | -0.20655 | -0.03535 | -0.05405 | -0.24517 | 0.399938 | -0.10537 |
| -0.20152 | 0.217139 | -0.18769 | 0.053363 | -0.2927  | -0.36697 | -0.28074 | 0.285943 | 0.137905 |
| -0.07898 | -0.27205 | -0.24532 | 0.02785  | -0.42719 | -0.45943 | -0.38022 | 0.538433 | 0.072903 |
| -0.16282 | 0.077724 | -0.19999 | -0.19283 | -0.3924  | -0.42984 | -0.08631 | 0.242232 | -0.22867 |
| -0.09688 | 0.136009 | -0.23378 | -0.11374 | -0.38365 | -0.39639 | -0.18578 | 0.229225 | -0.011   |
| -0.12707 | 0.025026 | -0.23608 | -0.1111  | -0.43969 | -0.34965 | -0.15859 | 0.347137 | -0.07517 |
| -0.16142 | 0.030057 | -0.17981 | 0.098227 | -0.22109 | -0.22814 | -0.09256 | 0.156259 | -0.01561 |
| 0.163244 | -0.01033 | -0.14279 | 0.249704 | -0.28723 | -0.15799 | -0.05472 | 0.183308 | 0.041067 |
| 0.010667 | -0.09068 | -0.28567 | 0.224853 | -0.47049 | -0.27125 | -0.04054 | 0.120119 | -0.01686 |
| -0.25418 | -0.10487 | -0.39367 | -0.09635 | -0.54741 | -0.4645  | -0.57077 | 0.740576 | 0.146891 |
| -0.07494 | 0.205425 | -0.1559  | -0.0427  | 0.061162 | -0.0603  | 0.117103 | -0.13721 | 0.149604 |
| -0.1599  | -0.03984 | -0.25603 | -0.0595  | -0.22762 | -0.36007 | -0.028   | 0.004695 | 0.117976 |
| -0.12759 | 0.058969 | -0.05937 | 0.057996 | -0.21993 | -0.1426  | 0.023071 | -0.11211 | 0.291844 |
| 0.134447 | 0.195648 | 0.050804 | 0.190305 | 0.263407 | -0.1167  | 0.163351 | 0.091124 | 0.181741 |
| 0.062867 | -0.09191 | -0.15692 | 0.079807 | -0.32388 | -0.26732 | -0.12711 | 0.019013 | 0.12419  |
| -0.20973 | 0.007837 | -0.00337 | -0.03177 | -0.17525 | -0.15763 | 0.047219 | -0.05796 | 0.082601 |
| -0.10058 | 0.097388 | -0.20524 | 0.195384 | 0.004128 | -0.0496  | 0.084465 | -0.11041 | 0.102819 |
| -0.37367 | -0.18537 | 0.026483 | -0.23597 | 0.004294 | -0.28956 | -0.0716  | -0.00818 | -0.05891 |

|          |          |          |          |          |          |          |          |          |
|----------|----------|----------|----------|----------|----------|----------|----------|----------|
| 0.086486 | -0.05016 | -0.17883 | 0.230975 | -0.21636 | -0.01392 | 0.07432  | -0.00494 | 0.302873 |
| -0.27875 | -0.09172 | -0.21934 | -0.12336 | -0.00051 | -0.09723 | 0.106961 | -0.11363 | 0.180306 |
| -0.13472 | -0.03193 | -0.15023 | -0.06758 | -0.10964 | -0.13417 | -0.14124 | -0.01037 | 0.278868 |
| -0.34796 | -0.22331 | -0.25692 | 0.231726 | -0.37747 | -0.60294 | -0.38537 | 0.564909 | -0.18155 |
| -0.05238 | 0.301476 | -0.24669 | 0.586542 | 0.117461 | 0.544618 | 0.119424 | 0.056036 | 0.421615 |
| -0.25768 | 0.019843 | -0.36695 | -0.1432  | 0.009387 | -0.12261 | 0.159683 | 0.088541 | 0.186824 |
| 0.024047 | -0.02086 | -0.21258 | 0.278186 | -0.22046 | -0.13926 | -0.20392 | -0.15663 | 0.291996 |
| 0.04358  | -0.1286  | 0.156583 | -0.14196 | 0.082619 | 0.153485 | -0.09196 | -0.02718 | -0.30751 |
| 0.087171 | -0.33092 | 0.214891 | -0.18411 | 0.187703 | 0.317293 | -0.05281 | 0.168999 | -0.32614 |
| 0.097861 | 0.048322 | -0.03767 | -0.16437 | -0.01056 | -0.03349 | 0.106507 | -0.12225 | 0.018939 |
| 0.097024 | -0.25565 | 0.267621 | -0.11124 | 0.142129 | 0.266348 | -0.08352 | -0.02631 | -0.34229 |
| 0.104963 | -0.33828 | -0.23973 | 0.05503  | -0.3447  | -0.34713 | -0.35739 | 0.289305 | 0.335767 |
| 0.119118 | -0.0246  | -0.03595 | 0.251901 | -0.04852 | 0.047808 | 0.259061 | -0.01334 | -0.15232 |
| -0.22129 | -0.09012 | -0.1679  | -0.00638 | -0.32635 | -0.17858 | 0.102006 | -0.06804 | -0.15874 |
| -0.01186 | -0.35067 | -0.22861 | 0.08131  | -0.53424 | -0.55401 | -0.45153 | 0.460789 | -0.05831 |
| -0.04449 | -0.11897 | -0.17196 | 0.037353 | -0.32398 | -0.25527 | -0.03113 | -0.01766 | 0.087252 |
| -0.18165 | -0.05971 | -0.05054 | -0.20772 | -0.22396 | -0.3118  | -0.05196 | 0.063639 | 0.122816 |
| -0.27658 | 0.029253 | -0.33068 | -0.02786 | -0.3533  | -0.4192  | -0.05052 | -0.16307 | -0.02471 |
| -0.29434 | -0.01955 | -0.16067 | -0.18771 | -0.29306 | -0.33392 | -0.12241 | -0.10888 | -0.08271 |
| -0.23135 | -0.08723 | -0.18372 | -0.12372 | -0.31928 | -0.28159 | -0.13417 | 0.056123 | 0.162541 |
| -0.23569 | -0.08557 | -0.2076  | 0.044817 | -0.24305 | -0.43761 | -0.14325 | -0.00668 | 0.117254 |
| -0.16363 | -0.03659 | -0.21021 | -0.1011  | -0.3049  | -0.36289 | -0.04793 | 0.036137 | 0.164186 |
| 0.123481 | 0.16008  | 0.099658 | 0.120047 | -0.24813 | -0.31973 | -0.31621 | -0.03597 | 0.013775 |
| 0.215486 | -0.31463 | -0.25602 | 0.178609 | -0.40961 | -0.0918  | 0.100182 | -0.04381 | 0.350171 |
| -0.03811 | -0.22638 | -0.25301 | -0.16903 | -0.31264 | -0.39861 | -0.12747 | -0.02721 | 0.234802 |
| -0.24858 | -0.13619 | 0.079108 | 0.052233 | -0.24266 | -0.37061 | -0.04495 | 0.228758 | -0.06453 |
| -0.0794  | -0.002   | -0.04725 | -0.03693 | -0.32618 | -0.31247 | -0.15069 | -0.05816 | 0.025326 |
| -0.21619 | -0.14996 | -0.08639 | -0.2083  | -0.41204 | -0.28634 | -0.13145 | 0.158731 | 0.249141 |
| -0.04839 | -0.04273 | -0.02324 | 0.086183 | -0.26797 | -0.39016 | -0.03378 | -0.05352 | -0.03644 |
| -0.33302 | 0.086693 | -0.19149 | -0.0246  | -0.27438 | -0.31423 | -0.12243 | 0.175614 | -0.0042  |
| -0.13235 | -0.35092 | -0.41931 | 0.206417 | -0.62265 | -0.59151 | -0.64911 | 0.698043 | 0.393112 |
| -0.25727 | -0.19359 | -0.38847 | 0.114326 | -0.52204 | -0.66532 | -0.40621 | 0.636706 | -0.05376 |
| -0.29503 | -0.27246 | -0.4238  | 0.227857 | -0.52365 | -0.69045 | -0.38711 | 0.684923 | -0.23721 |
| -0.24113 | -0.35173 | -0.53623 | -0.0652  | -0.53839 | -0.70878 | -0.34512 | 0.650178 | -0.22259 |
| -0.03499 | -0.26963 | -0.12728 | 0.094429 | -0.44373 | -0.53923 | -0.11267 | 0.356202 | 0.135966 |

| TCGA-XD-A | TCGA-XD-A | TCGA-XD-A | TCGA-XN-A | TCGA-XN-A | TCGA-YB-A | TCGA-Z5-AAPL |
|-----------|-----------|-----------|-----------|-----------|-----------|--------------|
| -0.24599  | -0.28008  | -0.32987  | 0.095009  | -0.23517  | -0.26249  | -0.23976     |
| -0.39904  | -0.40936  | 0.486866  | -0.00638  | -0.32098  | -0.07157  | -0.46586     |
| -0.02117  | -0.02613  | -0.11754  | -0.04033  | 0.069763  | 0.426305  | -0.36357     |
| -0.14725  | -0.40601  | 0.277189  | 0.260709  | 0.016234  | 0.197986  | -0.32042     |
| -0.05224  | 0.074235  | 0.458652  | 0.313129  | -0.19671  | 0.233418  | -0.4136      |
| 0.083501  | 0.260365  | 0.161826  | -0.01056  | -0.16197  | 0.085047  | -0.28398     |
| -0.3594   | -0.23788  | -0.14511  | -0.33933  | -0.48363  | -0.00932  | -0.41986     |
| -0.00973  | 0.116335  | 0.201255  | -0.02502  | -0.13982  | -0.04564  | -0.2279      |
| -0.15488  | -0.16897  | 0.093238  | -0.05606  | -0.04397  | 0.073166  | -0.30122     |
| -0.03105  | 0.204484  | 0.081529  | -0.11499  | 0.166953  | 0.29892   | -0.20982     |
| -0.14876  | -0.05414  | 0.26511   | -0.34676  | -0.17761  | 0.059457  | -0.16743     |
| -0.11647  | 0.139936  | 0.111396  | -0.09603  | -0.20594  | 0.133009  | -0.11179     |
| -0.10209  | -0.0926   | 0.290044  | -0.35282  | -0.16269  | 0.261071  | -0.5449      |
| -0.08886  | 0.02019   | 0.168976  | -0.15553  | -0.15769  | 0.065146  | -0.38797     |
| -0.1407   | -0.44927  | -0.04818  | -0.29147  | 0.290696  | 0.182802  | -0.4562      |
| 0.125265  | -0.35001  | 0.047777  | 0.014073  | 0.330084  | -0.10793  | -0.17086     |
| 0.137728  | -0.38572  | -0.00594  | -0.26141  | -0.28786  | 0.24681   | 0.016067     |
| 0.106916  | -0.15957  | -0.23146  | -0.34152  | 0.013097  | 0.238404  | 0.090879     |
| -0.25251  | -0.33339  | 0.126198  | 0.061131  | -0.47712  | 0.144582  | -0.16618     |
| -0.51942  | -0.40898  | -0.40869  | -0.43975  | -0.62176  | -0.57498  | 0.018741     |
| -0.12183  | -0.10407  | -0.01912  | -0.48059  | -0.19038  | -0.2446   | 0.33695      |
| -0.15379  | -0.40054  | -0.60186  | -0.543    | -0.0879   | -0.3      | 0.57689      |
| -0.11808  | 0.27005   | 0.113999  | -0.30979  | -0.17834  | 0.15403   | 0.008205     |
| -0.07193  | -0.21928  | 0.316283  | -0.03211  | -0.27047  | 0.312801  | -0.40159     |
| 0.058108  | 0.328478  | -0.17705  | -0.08298  | 0.192891  | 0.176675  | -0.08855     |
| 0.146833  | -0.36352  | -0.24523  | -0.21672  | 0.253376  | 0.189842  | -0.16232     |
| 0.36034   | 0.045296  | 0.274076  | 0.292196  | -0.27601  | 0.300952  | -0.47891     |
| 0.28887   | 0.352091  | -0.05573  | 0.257346  | 0.210424  | 0.194979  | 0.301527     |
| 0.069874  | 0.269895  | -0.31953  | 0.074566  | -0.08981  | 0.078442  | -0.30533     |
| -0.10346  | 0.391808  | 0.498238  | 0.281128  | 0.313599  | 0.287598  | -0.01892     |
| 0.287579  | 0.098462  | 0.168397  | 0.202491  | 0.400872  | 0.514229  | 0.422608     |
| 0.410142  | 0.388959  | -0.28703  | -0.03966  | 0.506187  | -0.04849  | 0.753796     |
| 0.094075  | 0.270394  | 0.161576  | -0.12124  | 0.258739  | 0.322435  | -0.20627     |
| 0.136808  | 0.265272  | 0.340422  | 0.006333  | 0.294464  | 0.389003  | -0.27039     |
| 0.22029   | 0.245644  | 0.151773  | -0.06726  | 0.386529  | 0.354377  | -0.202       |
| -0.16141  | 0.352252  | -0.09598  | -0.19696  | -0.23552  | 0.362249  | -0.37397     |
| -0.05288  | 0.27956   | -0.51766  | -0.19914  | -0.38259  | 0.130101  | -0.23682     |
| -0.37087  | 0.328464  | 0.02786   | 0.056744  | -0.15565  | 0.352164  | -0.26215     |
| -0.34779  | 0.04292   | 0.402664  | -0.17072  | -0.43127  | 0.181862  | -0.32486     |
| -0.16988  | 0.082285  | -0.10244  | -0.30466  | -0.32618  | 0.423273  | -0.33745     |
| -0.09939  | 0.230053  | 0.408326  | 0.108736  | -0.33838  | 0.35609   | -0.23377     |
| -0.23084  | -0.01473  | 0.333535  | -0.04743  | -0.34236  | 0.115633  | -0.46849     |
| 0.100352  | -0.24566  | -0.33361  | -0.1534   | -0.28745  | 0.161868  | -0.39925     |
| -0.20382  | 0.63651   | 0.063784  | 0.075026  | -0.54123  | 0.451468  | -0.46258     |
| -0.07943  | -0.21035  | -0.26401  | -0.12393  | -0.03173  | 0.446786  | -0.43543     |
| -0.35499  | 0.05586   | 0.487801  | -0.2401   | -0.24954  | 0.230233  | -0.38006     |
| -0.20233  | 0.27057   | -0.3      | -0.09995  | -0.11954  | -0.20759  | -0.17954     |
| -0.16026  | -0.10507  | -0.37723  | -0.14182  | -0.14452  | 0.068142  | 0.0279       |
| -0.35232  | -0.12614  | -0.37943  | 0.03136   | -0.27695  | -0.20336  | 0.094996     |

|          |          |          |          |          |          |          |
|----------|----------|----------|----------|----------|----------|----------|
| -0.14075 | 0.241973 | -0.24747 | -0.32702 | -0.15893 | -0.11452 | -0.17523 |
| -0.14934 | 0.250941 | -0.30723 | -0.0665  | -0.19802 | -0.08492 | -0.36863 |
| -0.3579  | 0.20635  | -0.15907 | -0.15747 | -0.18632 | -0.18245 | 0.189996 |
| -0.02266 | -0.21092 | -0.55417 | -0.19432 | -0.49377 | -0.12923 | -0.38043 |
| -0.11708 | -0.13908 | -0.05077 | 0.092263 | -0.40227 | -0.32709 | -0.11382 |
| -0.26811 | 0.22026  | -0.20715 | -0.32897 | -0.13241 | 0.125709 | -0.41966 |
| -0.04445 | -0.05341 | -0.05366 | -0.26079 | -0.19057 | -0.21081 | -0.29012 |
| -0.02661 | 0.136632 | 0.065077 | -0.13674 | -0.06482 | 0.060383 | -0.22016 |
| 0.107118 | 0.187523 | 0.110422 | 0.025315 | -0.01717 | 0.13379  | -0.20062 |
| 0.27407  | 0.207542 | -0.0055  | -0.13907 | -0.04632 | 0.419897 | -0.14321 |
| 0.080246 | -0.12113 | -0.45258 | -0.2327  | -0.09174 | -0.00639 | -0.24555 |
| 0.097578 | 0.279421 | -0.02077 | 0.553901 | 0.374526 | 0.207163 | -0.42463 |
| -0.22252 | -0.02273 | -0.27462 | -0.21429 | -0.33185 | -0.21892 | -0.12426 |
| -0.17629 | 0.289616 | -0.19804 | 0.0032   | -0.0703  | 0.239035 | -0.2955  |
| -0.13215 | 0.12082  | 0.256772 | -0.04035 | -0.32055 | 0.304282 | -0.30489 |
| -0.12059 | 0.079456 | -0.03178 | -0.19226 | -0.24668 | 0.19994  | -0.33297 |
| 0.051765 | -0.11386 | 0.610368 | 0.383784 | 0.42859  | 0.510028 | -0.346   |
| 0.077559 | -0.32811 | 0.396871 | 0.275661 | 0.04222  | 0.256762 | -0.26439 |
| 0.146008 | 0.171324 | 0.041291 | -0.07335 | 0.052918 | 0.01247  | 0.010597 |
| 0.221127 | 0.359861 | -0.3051  | -0.27263 | -0.27175 | 0.195456 | -0.28772 |
| 0.180173 | 0.301059 | -0.58416 | 0.04204  | -0.13368 | -0.00859 | 0.092931 |
| 0.038244 | 0.055767 | -0.52952 | -0.26513 | -0.34241 | -0.11526 | -0.37813 |
| 0.163304 | 0.215855 | -0.37931 | -0.24047 | -0.42908 | 0.168408 | -0.35217 |
| -0.41997 | -0.09901 | -0.60147 | -0.27516 | -0.54009 | -0.57808 | 0.152056 |
| -0.1283  | -0.06837 | -0.32095 | -0.03878 | 0.118358 | 0.136127 | -0.23175 |
| -0.18805 | -0.11123 | 0.43197  | -0.37603 | -0.13608 | 0.345589 | -0.25303 |
| -0.42315 | 0.064647 | 0.39179  | -0.27843 | -0.38542 | 0.330845 | -0.30853 |
| 0.136605 | 0.660054 | -0.13614 | -0.37772 | -0.3582  | 0.153254 | -0.32394 |
| 0.039552 | 0.056394 | -0.01812 | -0.40671 | -0.22433 | -0.2885  | -0.02091 |
| -0.09008 | -0.26481 | 0.152291 | -0.07472 | -0.36037 | 0.077009 | -0.24692 |
| -0.11153 | 0.214456 | 0.358835 | -0.29266 | -0.18351 | 0.222313 | -0.40221 |
| -0.15394 | 0.120744 | 0.353616 | -0.28974 | -0.23509 | 0.333482 | -0.37015 |
| -0.33976 | 0.107568 | 0.411842 | -0.20053 | -0.31421 | 0.125669 | -0.35313 |
| -0.06058 | 0.243471 | 0.084558 | 0.335016 | -0.33674 | 0.079157 | -0.47096 |
| 0.105349 | 0.096969 | -0.09658 | -0.15695 | 0.068973 | 0.074227 | -0.13567 |
| 0.55324  | 0.375817 | -0.77792 | -0.53692 | 0.588974 | -0.46514 | 0.695082 |
| -0.0719  | -0.01072 | -0.49368 | -0.14445 | -0.04404 | -0.38236 | 0.513861 |
| 0.136256 | -0.19896 | -0.50756 | -0.18137 | 0.020015 | -0.44325 | 0.296431 |
| -0.66787 | 0.133855 | -0.39723 | 0.369155 | -0.50108 | -0.4626  | 0.59094  |
| 0.260961 | 0.287484 | -0.37078 | 0.179064 | 0.168146 | -0.22639 | 0.587591 |
| -0.34638 | 0.682853 | -0.33977 | 0.127962 | 0.279702 | -0.36995 | 0.297053 |
| 0.130151 | -0.54904 | -0.64755 | -0.24869 | -0.31674 | -0.48241 | 0.122385 |
| 0.28726  | 0.212962 | 0.007141 | -0.11634 | -0.18269 | 0.263875 | -0.29655 |
| -0.5437  | 0.019041 | -0.23229 | 0.303264 | -0.45486 | -0.18118 | 0.388034 |
| -0.35948 | -0.10308 | -0.36691 | 0.078324 | -0.32821 | -0.4533  | 0.443915 |
| -0.62682 | 0.073481 | -0.37082 | 0.094471 | -0.52119 | -0.44066 | 0.575027 |
| -0.62139 | -0.00403 | -0.24816 | -0.23201 | -0.47765 | -0.49875 | 0.582487 |
| 0.230809 | 0.191439 | 0.143472 | -0.12089 | 0.308446 | 0.301553 | 0.054794 |
| 0.05905  | -0.01516 | 0.222741 | -0.02651 | 0.164957 | 0.05413  | 0.010252 |
| 0.302621 | 0.179229 | -0.08341 | -0.18964 | 0.315076 | 0.273856 | 0.069984 |

|          |          |          |          |          |          |          |
|----------|----------|----------|----------|----------|----------|----------|
| 0.322434 | 0.258848 | 0.047775 | -0.20988 | 0.353558 | 0.416825 | 0.300746 |
| 0.325286 | 0.255732 | 0.159735 | -0.12608 | 0.313318 | 0.371368 | 0.336338 |
| 0.277769 | 0.162188 | 0.073703 | -0.10011 | 0.279001 | -0.03872 | 0.126124 |
| 0.343342 | 0.063805 | -0.05041 | -0.18668 | 0.289739 | 0.254239 | 0.060317 |
| -0.34174 | 0.236258 | -0.32924 | 0.183747 | -0.19354 | -0.31264 | 0.43258  |
| -0.0407  | 0.129421 | 0.03472  | 0.115452 | -0.10731 | -0.29231 | 0.235685 |
| -0.20118 | 0.222628 | -0.20622 | 0.26254  | -0.15483 | -0.06889 | 0.090727 |
| -0.07699 | -0.21102 | -0.06508 | 0.111177 | -0.18713 | -0.3689  | 0.25473  |
| -0.08632 | -0.01991 | -0.13333 | -0.10825 | -0.24335 | 0.09519  | -0.04418 |
| 0.084777 | 0.113878 | 0.234873 | -0.12789 | 0.188584 | 0.327812 | -0.08805 |
| -0.38437 | -0.13338 | -0.0434  | -0.31536 | -0.38277 | 0.082797 | -0.40016 |
| 0.168534 | 0.052738 | 0.168844 | 0.132861 | 0.147698 | -0.10683 | 0.072663 |
| 0.030829 | 0.207098 | 0.198566 | -0.04366 | 0.228038 | 0.132878 | 0.198229 |
| 0.283445 | 0.165588 | 0.099969 | -0.01468 | 0.335165 | 0.321362 | -0.00523 |
| 0.209538 | 0.008902 | 0.132418 | -0.0077  | 0.15977  | 0.209418 | -0.06799 |
| 0.082302 | 0.133891 | 0.202288 | -0.15235 | 0.07368  | 0.204207 | -0.10345 |
| -0.11326 | 0.169147 | 0.111369 | 0.465738 | -0.18431 | 0.180066 | -0.43454 |
| 0.051085 | -0.03633 | 0.094219 | 0.165047 | 0.199778 | 0.346429 | -0.33345 |
| 0.369207 | -0.05637 | 0.293436 | 0.086956 | 0.34747  | 0.328625 | -0.21606 |
| 0.076192 | 0.058785 | 0.270552 | 0.128526 | 0.266561 | 0.343224 | -0.22371 |
| 0.117187 | 0.229404 | 0.283703 | 0.006051 | 0.262591 | 0.03138  | 0.097775 |
| 0.124792 | 0.176282 | 0.369871 | 0.279617 | 0.351796 | 0.335567 | -0.22985 |
| 0.09654  | 0.225902 | 0.396755 | 0.338683 | 0.404201 | 0.467244 | -0.38181 |
| 0.375239 | 0.341291 | 0.136024 | 0.007918 | 0.555238 | 0.438205 | 0.118488 |
| 0.125611 | 0.044208 | 0.40608  | 0.035585 | 0.022031 | 0.220164 | -0.293   |
| -0.01749 | 0.137981 | 0.368637 | 0.048559 | 0.039733 | 0.381705 | -0.35537 |
| 0.044712 | 0.177861 | 0.266928 | 0.244589 | 0.263019 | 0.298973 | -0.20912 |
| 0.308071 | 0.140943 | 0.340898 | 0.202249 | 0.330289 | 0.335758 | -0.30443 |
| 0.282675 | 0.081487 | -0.10436 | 0.102373 | 0.40264  | 0.16857  | 0.517817 |
| 0.041995 | 0.092994 | 0.230557 | -0.27293 | 0.143456 | 0.261688 | 0.402426 |
| 0.132886 | 0.059293 | 0.168866 | -0.42652 | 0.293249 | 0.277033 | 0.364665 |
| -0.00814 | 0.18568  | 0.221104 | -0.11515 | 0.143851 | 0.15227  | 0.477363 |
| 0.228156 | -0.02057 | -0.16163 | -0.27034 | 0.20287  | -0.03632 | 0.533717 |
| 0.378769 | 0.109683 | 0.081677 | -0.2167  | 0.317758 | 0.185089 | 0.403157 |
| 0.423396 | 0.375895 | -0.02351 | -0.25562 | 0.44382  | 0.426808 | 0.475659 |
| 0.20518  | 0.170283 | 0.201958 | -0.15179 | 0.388884 | 0.101502 | 0.409531 |
| 0.272274 | 0.173579 | 0.205806 | -0.15013 | 0.317068 | 0.212069 | 0.479375 |
| 0.373794 | 0.299111 | 0.155701 | -0.24946 | 0.403235 | 0.232182 | 0.530871 |
| 0.239386 | 0.122475 | 0.060892 | -0.19804 | 0.238509 | 0.070385 | 0.308579 |
| -0.01578 | 0.135964 | 0.19953  | 0.092928 | 0.212622 | 0.301776 | 0.081899 |
| 0.267334 | 0.349009 | 0.285645 | 0.074509 | 0.349103 | 0.342147 | 0.079696 |
| 0.246402 | 0.123051 | -0.08751 | -0.06812 | 0.567225 | 0.393603 | 0.663365 |
| 0.246652 | 0.048881 | 0.107329 | -0.00357 | 0.186077 | 0.238629 | 0.256669 |
| 0.172822 | 0.127156 | 0.246618 | 0.085673 | 0.26058  | 0.017376 | 0.201378 |
| 0.207674 | -0.07293 | 0.085522 | -0.05898 | 0.283436 | 0.224799 | -0.05967 |
| 0.141362 | 0.200684 | 0.126538 | 0.053948 | 0.180437 | 0.173778 | 0.229501 |
| 0.064228 | 0.217556 | 0.298445 | 0.219803 | 0.307928 | 0.335169 | -0.05945 |
| 0.154643 | 0.190074 | 0.129177 | 0.073898 | 0.072356 | 0.006361 | 0.048764 |
| 0.133877 | -0.00016 | 0.13796  | -0.04446 | 0.223141 | 0.11426  | -0.07173 |
| -0.03263 | 0.093178 | 0.082421 | 0.14021  | -0.10099 | -0.23119 | 0.159974 |

|          |          |          |          |          |          |          |
|----------|----------|----------|----------|----------|----------|----------|
| 0.128124 | 0.043378 | 0.148817 | 0.073667 | 0.311866 | 0.340244 | -0.17447 |
| 0.171825 | 0.216444 | 0.213136 | -0.00643 | -0.08399 | 0.264087 | -0.2266  |
| 0.213055 | 0.101876 | 0.16543  | 0.09699  | -0.04852 | 0.305116 | -0.14444 |
| 0.439546 | 0.283744 | -0.1264  | -0.2483  | 0.494362 | 0.44252  | 0.579432 |
| 0.481848 | 0.107614 | -0.26038 | 0.291031 | -0.43327 | 0.35529  | -0.51139 |
| 0.012842 | 0.158206 | 0.26593  | 0.058671 | 0.156731 | 0.136224 | -0.19817 |
| 0.058537 | 0.116378 | 0.217145 | -0.07067 | 0.209187 | 0.307249 | -0.32491 |
| -0.12946 | 0.230061 | -0.25369 | -0.15726 | -0.10083 | -0.0798  | -0.14448 |
| -0.28423 | 0.314329 | -0.34048 | -0.11644 | -0.10192 | -0.24727 | 0.03116  |
| 0.173353 | 0.287016 | 0.09726  | -0.24914 | 0.134608 | 0.157119 | 0.095483 |
| -0.25004 | 0.167002 | -0.32736 | -0.1612  | -0.18954 | -0.12713 | -0.04879 |
| 0.35202  | 0.286835 | -0.08073 | -0.02046 | 0.483485 | 0.354415 | 0.107881 |
| 0.004763 | 0.073485 | -0.12226 | 0.028562 | -0.01832 | 0.276888 | -0.30311 |
| 0.114618 | 0.076356 | 0.341342 | -0.28743 | 0.148059 | 0.30048  | -0.02652 |
| 0.266193 | 0.278676 | 0.377471 | 0.024902 | 0.356835 | 0.472757 | 0.472166 |
| 0.051746 | 0.124228 | 0.219004 | 0.135675 | 0.199848 | 0.270496 | -0.09742 |
| 0.04419  | 0.035301 | 0.202657 | 0.138171 | 0.220773 | 0.091747 | 0.155294 |
| 0.056934 | 0.077782 | 0.285633 | 0.234493 | 0.151045 | 0.17173  | 0.044076 |
| -0.07027 | 0.083761 | 0.308898 | -0.022   | 0.193163 | 0.107651 | -0.00668 |
| 0.127491 | 0.086627 | 0.452722 | 0.176735 | 0.242082 | -0.04604 | 0.016259 |
| 0.166028 | 0.090274 | 0.14512  | 0.162811 | 0.282074 | 0.00098  | 0.02524  |
| 0.05353  | -0.01304 | 0.312204 | 0.208036 | 0.205946 | 0.138186 | 0.074002 |
| 0.222367 | 0.225098 | 0.207576 | 0.025505 | 0.186002 | 0.044243 | 0.016225 |
| -0.05751 | 0.018196 | 0.331891 | 0.347468 | 0.368507 | 0.438975 | -0.36319 |
| 0.10848  | 0.094016 | 0.217674 | 0.130424 | 0.325999 | 0.172067 | -0.13561 |
| 0.091144 | 0.372791 | 0.085646 | -0.03763 | 0.22481  | 0.02921  | 0.028491 |
| 0.12822  | 0.21122  | 0.268338 | -0.03808 | 0.321155 | 0.034089 | 0.031447 |
| 0.248998 | 0.195707 | 0.468642 | -0.02597 | 0.273122 | 0.207662 | 0.294535 |
| -0.02089 | 0.271785 | 0.311734 | 0.182981 | 0.060959 | 0.052884 | -0.06209 |
| 0.0581   | 0.099398 | 0.313608 | 0.117881 | 0.153693 | -0.0098  | 0.098158 |
| 0.572719 | -0.11619 | 0.085897 | 0.222311 | 0.588194 | 0.623094 | 0.607904 |
| 0.325296 | 0.022148 | 0.016194 | -0.00605 | 0.533536 | 0.412493 | 0.638063 |
| 0.351559 | 0.092773 | -0.05044 | -0.07364 | 0.554258 | 0.454023 | 0.698105 |
| 0.443768 | 0.070595 | -0.11125 | -0.12132 | 0.587304 | 0.233157 | 0.682433 |
| 0.279812 | 0.267829 | 0.204625 | -0.10843 | 0.414867 | 0.474981 | 0.350781 |
